# Supplementary material for: Association between serum lipid and papillary thyroid cancer: a retrospective study in China
Source: PeerJ. 2025 Jun 23;13:e19644. doi: 10.7717/peerj.19644 (PMC12199739; doi:10.7717/peerj.19644)
Supplement: Supplemental Information 1 [file peerj-13-19644-s001.xlsx]

## Sheet: Primary PTC patients
NO	Course (months)	Symptoms	Hoarseness	Sore Throat	Dysphagia	Fever	High(cm)	Weight(kg)	BMI	Gender(1:male,2:female)	Age (year)	Age groups(1:18-34;2:35-55;3:55-)	Tumour size(cm)	Nodule number	Lymph Node Metastasis(1:yes,0:no)	positive lymph nodes	sampled lymph nodes	Lymph node ratio	FBG (mmol/L)	TG (mmol/L)	TCH(mmol/L)	HDL-C (mmol/L)	HDL/TG	LDL-C (mmol/L)	LDL/TG	LDL/HDL	vLDL-C (mmol/L)	TSH(mIU/L)	TT4(nmol/L)	TT3(nmol/L)	FT4(pmol/L)	FT3(pmol/L)
1	0.05	0					171	80	27.3588	1	48	2	1.5	2	1	7	10	70	4.76	2.74	5.58	0.95	17.0251	3.7	66.3082	3.89474	0.93	0.642	112.17	1.19	14.23	4.27
2	3	1		1			160	55	21.4844	2	43	2	0.5	1	1	2	12	16.6667	5.36	0.99	5.24	1.54	29.3893	3.05	58.2061	1.98052	0.65	0.914	102.66	1.6	13.42	4.88
3	1.5	0					156	43	17.6693	2	32	1	1.3	1	0				5.31	0.69	4.31	1.56	36.1949	2.17	50.348	1.39103	0.58	2.218	96.81	1.8	16.81	3.77
4	1	1		1			155	50	20.8117	2	66	3	0.4	2	0				6.51	0.77	7.7	2.25	29.2208	4.76	61.8182	2.11556	0.69	1.317	110.99	1.3	12.86	4.02
5	0.2	0					153	43	18.369	2	27	1	2	1	1	5	12	41.6667	4.46	0.76	4.63	1.78	38.4449	2.39	51.6199	1.3427	0.46	2.424	169.54	1.77	13.82	5.36
6	2	0					169	67	23.4586	1	38	2	0.8	1	0				4.92	2.6	4.71	0.92	19.5329	2.87	60.9342	3.11957	0.92	2.34	70.54	1.47	14.18	4.42
7	1	0					165	52	19.1001	2	57	3	1.2	2	1	3	21	14.2857	4.44	0.81	5.71	2.39	41.8564	2.8	49.0368	1.17155	0.52	0.336	100.43	1.48	12.36	4.92
8	0.5	0					155	53	22.0604	2	56	3	2.5	3	0				5.2	0.92	4.26	1.65	38.7324	0.39	9.15493	0.236364	2.22	0.094	104.3	1.89	19.42	5.67
9	0.1	0					165	60	22.0386	1	52	2	0.3	1	0				5.44	0.72	3.84	1.15	29.9479	2.26	58.8542	1.96522	0.43	1.272	80.21	2.17	11.73	4.9
10	0.2	0					160	58.5	22.8516	2	39	2	0.3	1	0				4.91	0.72	3.52	0.98	27.8409	2.14	60.7955	2.18367	0.4	1.356	101.78	1.5	13.42	4.65
11	0.5	0					155	55	22.8928	2	67	3	0.5	2	0				5.4	1.42	5.11	1.99	38.9432	2.55	49.9022	1.28141	0.57	1.165	112.97	2.06	14.07	4.41
12	1	0					170	72	24.9135	2	38	2	0.5	3	0				5.36	1.76	3.86	0.83	21.5026	2.41	62.4352	2.90361	0.62	1.768	150.79	1.29	15.69	5.39
13	5	0					170	53	18.3391	2	36	2	1	2	0				5.07	0.69	4.17	1.23	29.4964	2.52	60.4317	2.04878	0.42	0.444	118.23	1.59	14.92	4.23
14	1	0					155	43	17.898	2	33	1	0.5	1	0				4.81	0.55	3.93	1.69	43.0025	1.96	49.8728	1.15976	0.28	1.934	121.2	1.48	12.74	3.95
15	1	0					155	54	22.4766	2	29	1	1	1	1	1	6	16.6667	4.75	0.68	3.91	1.48	37.8517	2.11	53.9642	1.42568	0.32	0.201	80.02	1.49	12.99	4.47
16	0.05	0					160	69	26.9531	2	35	2	0.3	1	0				4.96	0.76	3.99	1.03	25.8145	2.55	63.9098	2.47573	0.41	1.366	96.73	1.12	12.75	3.68
17	0.1	0					160	70	27.3438	1	36	2	0.7	1	1	1	18	5.55556	4.73	1.36	3.97	0.93	23.4257	2.46	61.9647	2.64516	0.58	1.71	81.04	1.73	13.4	4.05
18	4	0					169	68	23.8087	1	53	2	0.4	1	1	3	4	75	6.42	2.9	6.12	1.17	19.1176	3.97	64.8693	3.39316	0.98	0.244	93.24	1.12	14.4	2.93
19	0.01	0					159	56	22.151	2	42	2	0.9	1	0				4.86	1.58	4.69	1.23	26.226	2.83	60.3412	2.30081	0.63	1.029	101.08	1.49	12.5	4.48
20	1	0					160	52	20.3125	2	33	1	0.5	1	1	2	2	100	4.67	0.52	5.28	2.27	42.9924	2.78	52.6515	1.22467	0.23	0.597	99.67	1.62	12.16	4.74
21	0.1	0					169	63	22.0581	1	74	3	1	1	0				5.82	1.72	4.75	1.08	22.7368	3	63.1579	2.77778	0.67	1.7	61.71	1.14	12.02	4.81
22	0.1	0					170	70	24.2215	1	42	2	0.2	1	1	2	2	100	5.07	2.58	5.09	0.95	18.664	3.33	65.4224	3.50526	0.81	1.38	124.9	1.58	11.8	4.3
23	0.1	0					155	45	18.7305	2	52	2	0.7	1	0				5.09	0.9	6.33	2	31.5956	3.94	62.2433	1.97	0.39	1.754	113.59	1.07	10.8	4.87
24	2	1				1	161	55.5	21.4112	2	51	2	1	1	0				5.61	0.53	4.75	1.47	30.9474	2.89	60.8421	1.96599	0.39	0.89	102.07	1.82	12.2	4.92
25	0.1	0					160	70	27.3438	2	26	1	0.4	1	0				4.96	1.4	4.87	1.35	27.7207	2.87	58.9322	2.12593	0.65	3.028	116.04	1.22	13.2	3.54
26	4	0					162	53	20.1951	2	39	2	1	1	0				5.18	0.67	3.64	1.17	32.1429	2.07	56.8681	1.76923	0.4	0.358	72.72	1.39	12.2	4.13
27	4	0					156	65	26.7094	2	55	2	1	2	0				5.22	3.55	5.17	1.16	22.4371	2.88	55.706	2.48276	1.13	1.899	114.04	1.76	14	4.25
28	2	0					160	58	22.6562	2	48	2	0.7	1	1	1	18	5.55556	6.01	0.96	4.13	1.12	27.1186	2.48	60.0484	2.21429	0.53	1.209	89.99	1.43	11.4	3.41
29	1	0					186	89	25.7255	1	34	1	0.4	1	0				4.5	2.8	3.6	0.99	27.5	1.75	48.6111	1.76768	0.86	0.633	70.49	1.22	12.7	3.97
30	4	0					160	54	21.0938	2	34	1	2.5	1	1	10	19	52.6316	5.41	1	3.64	1.27	34.8901	2.11	57.967	1.66142	0.26	3.592	109.67	1.64	16.24	4.49
31	2.5	0					157	52	21.0962	2	53	2	1	2	0				5.4	1.47	4.8	1.42	29.5833	3.08	64.1667	2.16901	0.3	1.483	101.56	1.47	12.51	4.17
32	0.1	0					163	55	20.7008	2	24	1	0.5	1	1	5	6	83.3333	4.66	1.64	3.63	1.46	40.2204	1.7	46.832	1.16438	0.47	4.361	94.09	1.39	13.91	4.39
33	10	0					158	67	26.8386	2	53	2	0.3	1	0				5.62	1.72	5.26	1.39	26.4259	3.39	64.4487	2.43885	0.48	1.536	104.51	1.31	14.04	4.27
34	4	0					162	58	22.1003	2	35	2	0.4	1	0				5.08	0.73	5.05	1.17	23.1683	3.64	72.0792	3.11111	0.24	2.072	105.58	1.57	15.9	4.06
35	3	0					152	51	22.0741	2	51	2	0.3	3	0				5.64	0.49	4.75	2.03	42.7368	2.67	56.2105	1.31527	0.05	6.551	103.06	1.54	10.52	4.73
36	0.1	0					150	60	26.6667	2	59	3	1	2	0				5.62	1.84	5.59	1.81	32.3792	3.41	61.0018	1.88398	0.37	0.204	97.98	1.52	15.24	4.66
37	0.06	0					169	56	19.6072	1	49	2	0.6	1	0				4.5	1.46	4.26	0.76	17.8404	2.92	68.5446	3.84211	0.58	1.392	107.02	1.75	12.98	5.11
38	0.1	0					163	55	20.7008	2	45	2	0.4	1	0				5.31	0.54	2.77	1.27	45.8484	1.34	48.3755	1.05512	0.16	3.014	125.91	1.57	10.97	4.24
39	0.2	0					150	56	24.8889	2	53	2	0.4	3	1	2	10	20	6.36	2.09	5.9	1.09	18.4746	3.92	66.4407	3.59633	0.89	0.945	87.72	1.35	13.23	4.15
40	0.3	0					162	57	21.7193	2	73	3	0.5	2	1	8	27	29.6296	5.24	1.57	6.11	1.17	19.1489	4.53	74.1408	3.87179	0.41	1.636	115.16	1.25	12.14	4.47
41	0.05	1			1		170	72	24.9135	2	49	2	0.8	3	1	2	22	9.09091	5.31	1.04	4.52	1.8	39.823	2.52	55.7522	1.4	0.2	1.704	82.35	1.41	11.11	4.23
42	0.8	0					172	88	29.7458	1	49	2	1.1	1	1	1	11	9.09091	5.47	1.73	5.9	0.94	15.9322	4.47	75.7627	4.75532	0.49	3.583	87.7	1.54	12.42	4.64
43	N	0					175	84.5	27.5918	1	69	3	0.5	1	0				5.43	1.72	4.79	1.06	22.1294	3.43	71.6075	3.23585	0.3	1.678	94.06	1.6	12.28	4.1
44	10	0					171	61	20.8611	2	59	3	1	2	0				4.81	0.78	5.46	1.78	32.6007	3.61	66.1172	2.02809	0.07	1.044	90.74	1.62	12.43	4.09
45	0.5	0					170	63	21.7993	2	52	2	1	2	1	1	1	100	4.93	0.83	4.7	1.53	32.5532	3.05	64.8936	1.99346	0.12	1.774	104.95	1.48	12.28	4.11
46	0.8	0					168	73	25.8645	1	50	2	1	3	0				5.32	2.06	3.88	0.86	22.1649	2.47	63.6598	2.87209	0.55	1.442	114.21	1.91	13.19	4.08
47	0.01	0					165	78	28.6501	1	49	2	0.3	1	0				5.49	3.33	5.62	0.95	16.9039	4.05	72.0641	4.26316	0.62	0.675	96.36	1.51	14.62	4.04
48	0.4	1		1			156	49	20.1348	2	72	3	0.6	1	0				6.12	0.76	6.15	2.22	36.0976	3.85	62.6016	1.73423	0.08	1.374	118.39	1.53	16.65	4.34
49	0.1	1	1				159	51	20.1733	2	51	2	0.9	1	0				3.87	0.78	3.89	2.07	53.2134	1.77	45.5013	0.855072	0.05	2.501	101.34	2.05	12.78	5.48
50	2	0								2	32	1	0.6	1	0				4.77	1.26	5.46	1.64	30.0366	2.94	53.8462	1.79268	0.88	1.147	85.27	1.58	10.94	4.75
51	5.5	0					172	95	32.112	1	50	2	2	2	1	4	14	28.5714	4.89	1.23	4.58	1.27	27.7293	2.73	59.607	2.14961	0.58	1.413	103.4	1.67	12.63	4.54
52	4	0					150	71.5	31.7778	2	62	3	0.6	2	1	2	2	100	5.04	1.86	5.63	1.53	27.1758	3.66	65.0089	2.39216	0.44	1.88	93.3	1	12.04	2.98
53	0.1	0					165	58	21.3039	2	35	2	0.6	1	1	1	6	16.6667	5.36	0.65	3.88	1.72	44.3299	1.96	50.5155	1.13953	0.2	2.818	84.7	1.4	10.62	3.8
54	0.1	0					174	86	28.4053	1	42	2	1.1	2	0				5.75	3.42	3.95	0.9	22.7848	2.03	51.3924	2.25556	1.02	1.25	73.7	1.26	14.88	4.21
55	0.05	0					159	58	22.9421	2	58	3	0.7	1	0				5.97	1.02	5.16	1.31	25.3876	3.29	63.7597	2.51145	0.56	1.529	89.74	1.52	9.94	4.31
56	4	0								1	57	3	0.4	1	0				5.45	0.99	4.02	1.14	28.3582	2.48	61.6915	2.17544	0.4	4.409	84.1	1.59	9.26	4.19
57	0.1	0					158	56	22.4323	2	48	2	1.2	3	1	1	17	5.88235	5.6	3.92	6.22	1.07	17.2026	3.65	58.6817	3.41121	1.5	1.093	104.8	1.45	11.32	4.49
58	0.3	0					158	62	24.8358	2	52	2	0.3	2	0				5.86	0.97	4.68	1.33	28.4188	0.52	11.1111	0.390977	2.83	1.067	113.94	1.43	10.54	4.81
59	2	0					158	66	26.4381	2	51	2	0.4	1	0				6.13	1.8	4.61	1.14	24.7289	3.02	65.5098	2.64912	0.45	1.232	102.76	1.54	11.96	4.1
60	0.2	0					158	52	20.83	2	33	1	0.4	3	1	1	8	12.5	5.62	0.51	3.95	1.44	36.4557	2.41	61.0127	1.67361	0.1	1.134	85.96	1.95	14.25	4
61	0.1	0					156	60	24.6548	2	26	1	0.8	1	0				5.17	1.86	4.74	0.93	19.6203	3.04	64.135	3.26882	0.77	2.169	133.34	1.37	12.26	4.08
62	8	0					176	71	22.921	1	52	2	1	1	1	2	5	40	5.44	1.47	6.39	1.77	27.6995	4.13	64.6322	2.33333	0.49	3.772	114.71	1.58	12.64	4.19
63	0.6	1		1			164	60.5	22.4941	2	55	2	0.3	3	0				5.4	1.94	6.81	1.41	20.7048	4.86	71.3656	3.44681	0.54	1.7	96.52	1.32	12.24	3.54
64	0.1	0					162	54	20.5761	2	36	2	0.5	1	1	1	3	33.3333	4.87	0.81	4.29	1.21	28.2051	2.7	62.9371	2.2314	0.38	0.894	127.67	1.57	14.39	4.59
65	2	1				1	165	64	23.5078	2	56	3	0.3	1	1	2	5	40	4.65	0.69	3.58	1.41	39.3855	1.82	50.838	1.29078	0.35	1.199	65.61	1.51	11.09	4.35
66	0.1	0					170	71.5	24.7405	1	56	3	1	1	0				5.07	0.94	3.4	1.18	34.7059	1.91	56.1765	1.61864	0.31	0.612	86.08	1.53	13.53	5.26
67	0.1	0					163	50	18.8189	2	54	2	1	2	0				4.96	0.88	4.18	1.34	32.0574	2.35	56.2201	1.75373	0.49	1.426	92.7	1.62	12.39	3.85
68	0.1	0					157	60	24.3418	2	41	2	0.6	2	0				4.64	0.7	3.64	1.24	34.0659	1.94	53.2967	1.56452	0.46	0.002	110.08	1.25	13.82	4
69	0.05	1		1			155	52.5	21.8522	2	49	2	2	1	1	4	15	26.6667	6.69	2.5	6.1	1.22	20	3.79	62.1311	3.10656	1.09	3.088	121.9	1.53	12.89	4.53
70	0.1	0					160	62	24.2188	2	67	3	0.6	2	0				5.12	1.25	4.9	1.27	25.9184	3.04	62.0408	2.3937	0.59	1.747	114.94	1.7	13.49	4.05
71	0.1	0					155	59	24.5578	2	32	1	0.3	1	1	5	11	45.4545	4.59	1.39	4.61	1.27	27.5488	2.75	59.6529	2.16535	0.59	2.697	90	1.58	15.62	4.55
72	0.5	0					155	56	23.3091	2	50	2	0.6	3	0				5.68	0.7	3.57	1.48	41.4566	1.86	52.1008	1.25676	0.23	2.254	103.91	2	11.89	5.25
73	N	0					183	100	29.8606	1	35	2	1	2	0				5.38	1.23	4.81	0.83	17.2557	3.36	69.8545	4.04819	0.62	1.267	102.84	1.38	10.96	4.24
74	0.2	0					176	75	24.2123	1	47	2	0.5	3	0				4.18	5.7	5.68	0.75	13.2042	2.59	45.5986	3.45333	2.34	1.329	99.71	1.52	12.16	4.96
75	0.1	0					163	54	20.3244	2	39	2	1	1	0				5.9	1.73	4.81	0.81	16.8399	3.13	65.0728	3.8642	0.87	1.107	103.2	1.38	13.8	4.12
76	1	0					158	54	21.6311	2	39	2	1	2	0				4.21	0.87	3.23	1.04	32.1981	1.83	56.6563	1.75962	0.36	0.951	72.28	1.59	12.29	4.27
77	N	0					162	60	22.8624	2	64	3	0.8	1	1	1	3	33.3333	4.44	2.09	4.28	1.05	24.5327	2.52	58.8785	2.4	0.71	1.293	93.58	1.8	13.28	4.47
78	N	0					163	65	24.4646	2	63	3	0.4	1	0				5.43	0.94	4.5	1.1	24.4444	3	66.6667	2.72727	0.4	1.928	112.95	1.51	14.44	3.84
79	3	0					162	65	24.7676	2	48	2	0.3	2	0				5.69	0.83	3.95	1.49	37.7215	2.14	54.1772	1.43624	0.32	1.056	92.05	1.12	11.88	3.73
80	7	0					160	54	21.0938	2	40	2	0.8	1	1	1	9	11.1111	4.72	0.98	3.48	1.15	33.046	2.02	58.046	1.75652	0.31	1.436	121.22	2.15	13.84	4.64
81	4	0					172	69	23.3234	1	32	1	0.5	1	0				4.06	0.68	3.42	1.24	36.2573	1.87	54.6784	1.50806	0.31	1.246	90	1.59	17.12	3.96
82	1	0					160	49	19.1406	2	58	3	0.9	3	0				4.28	0.71	5.21	1.83	35.1248	3.18	61.0365	1.7377	0.2	1.06	89.03	1.43	12.17	4.61
83	2	0					160	69	26.9531	2	43	2	0.4	1	0				5.74	1.07	4.02	1.38	34.3284	2.29	56.9652	1.65942	0.35	2.714	105.25	1.69	12.98	4.52
84	1	0					150	57	25.3333	2	64	3	0.6	2	1	1	16	6.25	5.16	1.27	5.31	1.21	22.7872	3.62	68.1733	2.99174	0.48	1.855	74.32	1.52	12.25	4.53
85	3	0					169	67	23.4586	1	43	2	1.3	1	1	7	9	77.7778	4.41	2.97	5.41	1.1	20.3327	3.15	58.2255	2.86364	1.16	3.102	117.49	1.69	11.97	4.37
86	6	0					155	53	22.0604	2	53	2	0.5	1	1	1	4	25	5.13	1.51	4.99	1.46	29.2585	2.93	58.7174	2.00685	0.6	3.1	90.61	1.61	13.41	4.32
87	N	0					170	71	24.5675	1	28	1	1.9	1	1	3	4	75	4.63	1.84	4.27	0.89	20.8431	2.66	62.2951	2.98876	0.72	0.945	115.65	1.59	10.6	4.17
88	0.1	0					162	62.5	23.815	1	58	3	1	2	0				5	2.14	4.61	0.86	18.6551	2.71	58.7852	3.15116	1.04	0.972	111.22	0.96	12.77	2.75
89	0.01	0					169	54	18.9069	1	46	2	0.9	1	1	1	3	33.3333	5.15	0.64	4.75	2.07	43.5789	2.42	50.9474	1.16908	0.26	0.684	108.91	1.49	13.47	4.39
90	0.4	0					166	68	24.677	1	28	1	1.2	2	1	2	3	66.6667	3.96	1.84	3.52	1.13	32.1023	1.72	48.8636	1.52212	0.67	0.565	103.94	1.31	13.76	4.76
91	N	0					155	57.5	23.9334	2	58	3	0.4	3	0				5.91	1.53	5.11	1.19	23.2877	3.08	60.274	2.58824	0.84	1.417	93.84	1.79	13.95	4.87
92	8	0					160	60	23.4375	2	70	3	1.1	2	0				4.99	1.64	5.78	1.1	19.0311	3.77	65.2249	3.42727	0.91	1.505	123.75	1.86	11.69	4.25
93	4	0					160	69	26.9531	2	52	2	0.1	3	0				4.61	2.9	5.1	0.76	14.902	2.81	55.098	3.69737	1.53	0.932	96.78	1.53	13.57	4.66
94	0.05	0					161	62	23.9188	2	59	3	0.5	1	1	1	7	14.2857	4.18	0.99	4.47	1.44	32.2148	2.4	53.6913	1.66667	0.63	1.091	85.05	1.66	10.36	4.7
95	8	1		1			155	54	22.4766	2	49	2	1.2	3	1	2	4	50	4.75	0.96	4.57	1.37	29.9781	2.65	57.9869	1.93431	0.55	0.318	95.76	1.64	13.42	4.21
96	0.1	0					158	57	22.8329	2	29	1	0.9	1	1	4	11	36.3636	4.63	0.77	3.82	1.52	39.7906	1.77	46.3351	1.16447	0.53	0.486	116.2	1.7	11.23	4.68
97	0.5	0					163	64	24.0882	2	58	3	0.8	2	1	2	7	28.5714	4.86	1.41	5.13	1.35	26.3158	2.99	58.2846	2.21481	0.79	0.751	99.62	1.67	13.01	4.21
98	0.4	0					155	52.5	21.8522	2	49	2	1.1	3	1	4	23	17.3913	4.87	0.73	5.13	2.1	40.9357	2.48	48.3431	1.18095	0.55	1.722	79.93	1.07	13.43	3.78
99	0.1	0					152	48	20.7756	2	40	2	0.6	1	0				4.38	0.87	4.51	1.69	37.4723	2.23	49.4457	1.31953	0.59	1.386	86.2	1.42	16.8	4.16
100	0.1	0					170	88	30.4498	1	43	2	3.1	2	1	8	8	100	4.4	2.22	4.87	0.93	19.0965	2.84	58.3162	3.05376	1.1	1.333	107.22	1.24	12.69	3.79
101	0.1	0					162	59.5	22.6718	2	51	2	1	1	0				5.12	0.92	4.87	1.15	23.614	3.07	63.039	2.66957	0.65	0.416	86.49	1.53	12.44	4.15
102	N	0					158	55	22.0317	2	59	3	0.7	2	1	1	8	12.5	4.62	1.4	4.08	1.33	32.598	2.06	50.4902	1.54887	0.69	2.561	86.02	1.67	14.05	4.72
103	0.2	0					154	45	18.9745	2	56	3	0.8	2	1	14	17	82.3529	5.56	1.09	4.05	1.54	38.0247	1.98	48.8889	1.28571	0.53	1.259	109.52	1.61	13.66	4.1
104	1	0					168	70	24.8016	1	49	2	0.7	1	0				4.89	0.6	4.43	0.9	20.316	3.03	68.3973	3.36667	0.5	1.457	95.85	1.35	12.12	4.05
105	2	0					168	57	20.1956	1	36	2	0.5	1	0				4.2	0.87	4.02	1.25	31.0945	2.52	62.6866	2.016	0.25	1.158	113.88	1.5	11.97	4.4
106	0.1	0					152	44.5	19.2607	2	40	2	0.3	1	0				5	0.71	4.33	1.8	41.5704	2.37	54.7344	1.31667	0.16	3.029	89.6	1.44	13.29	4.4
107	1	0					171	70	23.939	1	51	2	0.6	3	1	1	4	25	5.08	0.89	3.92	0.96	24.4898	2.7	68.8776	2.8125	0.26	0.386	90.06	1.79	12.67	4.62
108	0.05	0					162	60	22.8624	2	47	2	0.8	2	0				4.79	5.71	4.76	0.73	15.3361	1.16	24.3697	1.58904	2.87	1.112	100.09	1.74	12.95	4.81
109	0.5	0					170	80	27.6817	1	40	2	0.7	1	1	5	9	55.5556	5.04	1.91	5.47	1.33	24.3144	3.72	68.0073	2.79699	0.42	1.818	113.76	1.61	14.55	5.03
110	1.5	0					162	75	28.578	2	64	3	1.1	2	1	1	3	33.3333	5.34	1.54	5.6	1.23	21.9643	3.88	69.2857	3.15447	0.49	1.993	84.46	1.62	12.82	4.44
111	0.1	0					165	81	29.7521	1	56	3	2	1	1	4	30	13.3333	5.29	3.46	4.84	0.75	15.4959	2.87	59.2975	3.82667	1.22	3.069	140.56	1.52	13.06	4.09
112	4	0								2	36	2	0.6	1	1	7	10	70	4.56	0.71	3.03	1.1	36.3036	1.62	53.4653	1.47273	0.31	1.219	79.17	1.24	13.93	3.7
113	0.05	0					161	62.5	24.1117	2	58	3	0.7	1	0				4.63	1.21	5.64	1.39	24.6454	3.77	66.844	2.71223	0.48	1.493	87.17	1.67	8.51	4.62
114	0.1	0					155	50	20.8117	2	42	2	0.7	3	1	3	7	42.8571	4.57	2.51	4.75	1.49	31.3684	2.18	45.8947	1.46309	1.08	0.253	113.39	1.59	12.12	5.1
115	0.1	0					150	42	18.6667	2	50	2	0.4	1	0				4.39	3.55	4.33	0.98	22.6328	2.25	51.963	2.29592	1.1	1.399	107.67	1.4	12.44	3.88
116	0.9	0					167	80	28.6851	2	40	2	0.3	1	0				4.97	1.07	4.21	0.99	23.5154	2.87	68.171	2.89899	0.35	2.685	96.28	1.4	12.67	4.46
117	0.5	0					158	59	23.634	2	45	2	0.7	2	1	1	3	33.3333	4.69	1.59	4.78	1.2	25.1046	2.99	62.5523	2.49167	0.59	1.275	98.06	1.28	12.67	4.44
118	0.05	0					158	70	28.0404	2	42	2	0.3	2	0				4.61	1.36	5.1	1.41	27.6471	3.32	65.098	2.35461	0.37	1.331	97.39	2.7	12.14	5.54
119	4	0					156	54	22.1893	2	54	2	1	3	0				4.83	1.37	5.49	1.44	26.2295	3.64	66.3024	2.52778	0.41	1.301	84.63	1.41	13.7	4.65
120	3	0					155	66	27.4714	2	43	2	1.1	1	0				4.87	1.76	4.42	1.08	24.4344	2.82	63.8009	2.61111	0.52	1.456	100.13	1.95	10.66	4.78
121	4	0					157	45.5	18.4592	2	66	3	1.1	3	0				4.58	0.93	5.19	1.37	26.3969	3.52	67.8227	2.56934	0.3	2.405	109.22	1.73	12.98	4.84
122	N	0					158	55	22.0317	2	57	3	1	3	1	1	16	6.25	4.82	0.9	4.4	1.42	32.2727	2.61	59.3182	1.83803	0.37	1.454	92.88	1.21	12.56	4.56
123	0.1	0					152	50	21.6413	2	41	2	1	1	0				4.59	1.66	3.07	0.94	30.6189	1.62	52.7687	1.7234	0.51	1.969	100.43	1.52	11.14	4.61
124	0.2	0					160	55	21.4844	2	59	3	1.2	3	1	4	11	36.3636	5.48	0.73	4.59	1.85	40.305	2.41	52.5054	1.3027	0.33	2.991	103.21	1.64	12.6	4.42
125	0.1	0					175	70	22.8571	1	29	1	0.5	2	1	4	10	40	4.79	1.59	3.05	0.81	26.5574	1.81	59.3443	2.23457	0.43	0.666	92.48	1.34	12.75	4.09
126	0.1	0					180	84	25.9259	1	52	2	0.6	3	0				4.79	2.56	7.02	1.08	15.3846	5.38	76.6382	4.98148	0.56	1.883	109.57	1.99	12.23	5.36
127	0.1	0					157	53	21.5019	2	62	3	1.2	2	0				4.67	1.81	3.72	1.27	34.1398	1.83	49.1935	1.44094	0.62	1.469	85.13	1.64	12.01	4.77
128	0.1	0					160	53.5	20.8984	2	41	2	0.6	1	0				4.33	0.75	3.59	1.02	28.4123	2.07	57.6602	2.02941	0.5	1.58	105.89	1.71	12.23	4.16
129	2	0					155	66	27.4714	2	71	3	1	1	0				4.76	1.3	5.66	1.41	24.9117	3.87	68.3746	2.74468	0.38	0.376	95.97	1.62	12.7	4.53
130	1	0								2	52	2	0.8	2	1	1	5	20	5.44	1.14	4.91	1.61	32.7902	3	61.0998	1.86335	0.3	0.643	95.85	1.46	13.44	4.58
131	4	0					163	86	32.3685	2	41	2	2.7	1	1	2	7	28.5714	5.22	3.28	4.18	0.96	22.9665	2.09	50	2.17708	1.13	1.964	113.61	1.43	13.6	4.16
132	0.1	0					155	56	23.3091	2	51	2	1	3	0				4.81	1.58	6.44	1.28	19.8758	4.46	69.2547	3.48438	0.7	0.962	80.43	2.16	13.92	5.15
133	0.02	0					158	66	26.4381	2	77	3	0.4	2	0				4.31	1.03	5.4	1.55	28.7037	3.46	64.0741	2.23226	0.39	1.346	94.72	1.35	12.96	4.11
134	2	0					157	51	20.6905	2	46	2	0.4	1	0				4.88	0.65	3.29	1.45	44.0729	1.54	46.8085	1.06207	0.3	1.956	128.74	1.09	13.35	4.2
135	0.1	0					160	69.5	27.1484	2	53	2	0.3	1	0				4.81	1.17	4.01	1.19	29.6758	2.6	64.8379	2.18487	0.22	1.627	109.52	1.64	12.57	4.64
136	2	0					178	80	25.2493	1	42	2	1.2	1	0				5.33	0.83	4.36	1.18	27.0642	2.96	67.8899	2.50847	0.22	1.087	82.67	1.49	13.58	4.2
137	0.1	0					172	81	27.3797	1	36	2	0.5	1	1	1	7	14.2857	4.95	2.77	5.16	0.95	18.4109	3.45	66.8605	3.63158	0.76	1.135	97.07	1.5	11.05	5.04
138	2	1		1			165	56	20.5693	2	37	2	1	3	1	8	15	53.3333	4.67	2.2	4.01	0.87	21.6958	2.24	55.8603	2.57471	0.9	2.483	106.02	2.21	13.89	4.92
139	0.4	0					175	97	31.6735	1	31	1	0.7	1	0				4.78	1.39	3.57	1	28.0112	2.02	56.5826	2.02	0.55	0.957	121.4	1.7	11.41	5
140	2	0					155	56	23.3091	2	51	2	1	3	0				4.04	0.79	3.83	1.08	28.1984	2.48	64.752	2.2963	0.27	2.974	86.4	1.65	13.09	4.48
141	0.5	0					175	75	24.4898	1	52	2	0.5	1	0				4.92	0.66	3.83	1.47	38.3812	2.11	55.0914	1.43537	0.25	1.174	119.56	1.42	14.38	4.35
142	0.05	0					165	52.5	19.2837	2	40	2	0.9	1	0				4.52	0.59	3.39	1.6	47.1976	1.55	45.7227	0.96875	0.24	1.996	103.38	1.57	15.87	4.64
143	6	0					159	77	30.4577	2	51	2	0.7	3	0				5.16	1.76	5.39	1.38	25.603	3.37	62.5232	2.44203	0.64	1.367	83.44	1.44	12.45	4.49
144	0.5	0					168	75	26.5731	2	55	2	1	3	1	18	41	43.9024	4.75	1.01	4.54	1.57	34.5815	2.66	58.5903	1.69427	0.31	0.558	97.41	1.75	12.12	4.89
145	0.1	0					160	61.5	24.0234	2	46	2	0.5	1	0				4.36	1.38	3.64	0.98	26.9231	2.24	61.5385	2.28571	0.42	2.818	114.46	1.61	13.75	4.77
146	0.06	0					165	62.5	22.9568	1	35	2	0.5	1	1	2	5	40	5.48	3.76	4.63	0.84	18.1425	2.57	55.5076	3.05952	1.22	1.501	104.05	1.46	13.35	4.64
147	N	0					158	50	20.0288	2	57	3	0.2	1	0				4.18	3.28	4.18	0.87	20.8134	2.09	50	2.4023	1.22	0.816	96.21	1.5	14.64	4.17
148	8	0					159	59	23.3377	1	58	3	1	2	1	4	7	57.1429	4.25	1.34	3.17	1.03	32.4921	1.66	52.3659	1.61165	0.48	0.56	93.88	1.55	14.73	4.94
149	1	0					165	70.5	25.8953	1	44	2	1	3	0				4.27	1.05	3.65	1.14	31.2329	2.23	61.0959	1.95614	0.28	1.897	88.79	1.79	15.98	5.11
150	0.1	0					164	63.5	23.6095	2	32	1	1.6	2	1	5	8	62.5	4.42	0.64	3.79	1.51	39.8417	2.01	53.0343	1.33113	0.27	2.085	74.59	1.64	14.88	4.85
151	N	0					158	55	22.0317	2	52	2	0.9	2	1	2	19	10.5263	4.38	2.23	4.7	1.12	23.8298	3.01	64.0426	2.6875	0.57	2.589	123.78	1.22	12.49	4.22
152	2	0					168	70	24.8016	2	42	2	1	2	0				5.11	0.89	4.14	1.34	32.3671	2.54	61.3527	1.89552	0.26
153	N	0					160	60	23.4375	2	54	2	0.3	1	0				5	2.8	3.64	0.75	20.6044	2.09	57.4176	2.78667	0.8	2.515	90.86	1.58	12.05	3.87
154	4	0					158	57	22.8329	2	27	1	1.2	2	0				4.39	0.67	3.94	1.5	38.0711	2.08	52.7919	1.38667	0.36	1.109	81.49	1.32	12.58	4.73
155	0.2	0					170	64.5	22.3183	1	30	1	0.3	1	0				4.74	2.14	3.78	1.08	28.5714	2.21	58.4656	2.0463	0.49	2.018	90.94	1.35	13.5	3.98
156	0.4	0					168	69	24.4473	1	27	1	0.5	1	1	2	3	66.6667	4.8	0.59	4.18	1.34	32.0574	2.45	58.6124	1.82836	0.39	0.721	78.06	1.08	14.62	3.89
157	0.1	0					167	54	19.3625	2	55	2	0.8	2	1	1	3	33.3333	4.89	1.07	5.31	1.38	25.9887	3.52	66.29	2.55072	0.41	0.698	97.38	1.59	14.22	4.15
158	N	0					160	56.5	22.0703	2	54	2	0.8	1	0				5.45	0.72	4.24	1.84	43.3962	2.01	47.4057	1.09239	0.39	0.925	91.43	1.5	12.21	3.66
159	N	0					156	51	20.9566	2	59	3	1.2	1	0				4.56	1.77	5	1.44	28.8	3.07	61.4	2.13194	0.49	0.767	95.81	1.2	12.22	4.88
160	N	0					164	53	19.7055	2	42	2	0.8	2	0				4.43	0.85	3.59	1.49	41.5042	1.69	47.0752	1.13423	0.41	1.138	120.75	1.47	11.54	4.44
161	N	0					156	47	19.313	2	63	3	2	2	0				5.58	1.66	6.18	1.45	23.4628	4.44	71.8447	3.06207	0.29	0.977	99.97	1.53	13.2	4.05
162	0.1	0					158	49	19.6283	2	42	2	1.8	1	1	1	6	16.6667	4.93	0.7	4.47	1.5	33.557	2.65	59.2841	1.76667	0.32	0.621	83.45	1.85	15.25	5.36
163	1	0					165	57	20.9366	2	50	2	0.6	1	0				4.17	0.95	3.85	1.7	44.1558	1.78	46.2338	1.04706	0.37	1.24	99.6	1.64	12.75	4.28
164	3	0					165	59	21.6713	1	62	3	0.3	1	0				4.74	0.77	4.38	1.38	31.5068	2.75	62.7854	1.99275	0.25	1.704	86.23	1.25	13.06	3.53
165	0.2	0					172	62	20.9573	1	42	2	1	1	0				5.05	0.75	4.13	1.29	31.2349	2.54	61.5012	1.96899	0.3	1.908	90.87	1.7	13.54	4.61
166	2	0					155	60	24.974	2	40	2	0.5	1	0				5.52	1.07	3.91	1.21	30.9463	2.47	63.1714	2.04132	0.23	1.803	128.11	1.39	12.23	4.38
167	0.2	1	1				173	83.5	27.8994	1	52	2	0.8	1	1	2	4	50	4.3	0.87	4.96	1.48	29.8387	3.15	63.5081	2.12838	0.33	1.023	120.43	1.76	14.69	4.79
168	0.06	0					150	65	28.8889	2	59	3	0.8	1	0				4.66	2.6	5.18	1.29	24.9035	3.22	62.1622	2.49612	0.67	3.498	83.19	1.75	12.44	5.04
169	0.05	0					156	52	21.3675	2	45	2	0.7	2	0				4.59	1.08	4.9	1.26	25.7143	3.22	65.7143	2.55556	0.42	2.693	94.35	1.54	13.81	4.76
170	0.1	0					156	65	26.7094	2	43	2	0.9	3	0				5.76	1.85	5.54	1.13	20.3971	3.99	72.0217	3.53097	0.42	3.481	109.6	1.09	10.07	3.95
171	0.2	0					170	68	23.5294	2	56	3	0.9	1	1	2	5	40	4.95	1.77	5.17	1.46	28.2398	3.15	60.9284	2.15753	0.56	1.682	83.49	1.53	9.19	4.83
172	0.3	0					160	62	24.2188	2	62	3	1.4	3	1	1	1	100	4.35	1.76	5.76	1.05	18.2292	4	69.4444	3.80952	0.71	1.546	129.26	1.42	11.87	4.41
173	N	0					168	68	24.093	1	43	2	1	1	0				4.8	1.11	4.3	1.09	25.3488	2.79	64.8837	2.55963	0.42	1.135	92.65	1.75	11.77	4.98
174	2	0					162	53	20.1951	2	28	1	1.2	2	1	2	5	40	4.42	1.01	3.28	1.37	41.7683	1.64	50	1.19708	0.27	2.629	107.63	1.36	13.55	4.62
175	0.4	0					165	60	22.0386	1	44	2	0.3	2	0				4.55	0.9	4.49	1.28	28.5078	2.85	63.4744	2.22656	0.36	1.99	119.16	1.4	13.71	3.5
176	2	0					164	64	23.7954	2	45	2	0.4	1	1	1	6	16.6667	5.47	1.01	4.38	1.43	32.6484	2.73	62.3288	1.90909	0.22	1	101.61	1.92	12.86	4.55
177	0.1	0					165	60	22.0386	2	59	3	0.3	1	1	1	1	100	5.05	1.82	5.35	1.47	27.4766	3.05	57.0093	2.07483	0.83	0.481	117.76	1.59	12.33	4.98
178	0.1	0					158	67	26.8386	2	42	2	1.3	3	1	1	13	7.69231	5.51	1.09	4.93	1.04	21.0953	3.29	66.7343	3.16346	0.6	1.924	88.62	1.67	11.28	3.84
179	N	0					181	79	24.114	1	64	3	0.3	1	0				5.69	1.15	3.88	0.99	25.5155	2.29	59.0206	2.31313	0.6	0.517	109.51	1.78	12.62	5.28
180	0.06	0					168	88	31.1791	1	64	3	2	2	0				5.88	0.92	2.97	1.25	42.0875	1.43	48.1481	1.144	0.29	1.339	113.71	1.24	12.27	4.56
181	0.8	0					159	65	25.711	2	55	2	0.7	3	1	5	30	16.6667	5.03	2.72	6.4	1.35	21.0938	3.94	61.5625	2.91852	1.11	1.861	111.74	2.01	12.14	3.59
182	3	0					168	73	25.8645	1	30	1	2.2	1	1	3	11	27.2727	4.54	4.88	3.77	0.51	13.5279	1.48	39.2573	2.90196	1.78	2.431	137.12	1.19	13.93	4.92
183	0.02	0					163	76	28.6048	2	55	2	0.8	2	0				4.59	0.73	3.54	1.25	35.3107	2.01	56.7797	1.608	0.28	1.069	82.97	1.74	14.25	4.62
184	N	0					155	47	19.563	2	36	2	0.3	1	0				5.01	1.85	4.63	0.98	21.1663	3.21	69.3305	3.27551	0.44	2.923	118.31	1.36	14.14	4.03
185	0.06	0					165	69	25.3444	2	56	3	0.5	3	0				4.95	0.63	4.27	1.55	36.2998	2.53	59.2506	1.63226	0.19	1.18	76.51	1.51	13.61	4.28
186	0.5	0					179	75	23.4075	1	28	1	0.5	1	0				4.09	1.11	3.95	1.03	26.0759	2.53	64.0506	2.45631	0.39	1.491	136.8	1.63	15.24	4.3
187	N	0					163	69	25.9701	2	42	2	0.6	1	0				5.25	0.84	3.13	1.02	32.5879	2	63.8978	1.96078	0.11	1.213	83.36	1.69	14.93	4.66
188	3	0					163	53	19.9481	2	39	2	0.4	1	0				5.21	0.92	3.93	1.27	32.3155	2.31	58.7786	1.8189	0.35	0.527	122.04	2.04	13.16	5.55
189	0.1	0					172	86	29.0698	1	29	1	1.3	3	1	33	65	50.7692	3.69	1.72	5.25	1	19.0476	3.81	72.5714	3.81	0.44	2.569	104.51	1.6	12.19	4.36
190	0.1	0					169	69.5	24.3339	2	52	2	0.5	3	1	1	11	9.09091	5.1	3.21	4.61	0.82	17.7874	2.72	59.0022	3.31707	1.07	0.383	108.08	1.58	16.43	4.68
191	0.1	0					166	66	23.9512	1	41	2	0.6	1	0				4.02	1.93	5.37	0.99	18.4358	3.62	67.4115	3.65657	0.76	0.829	84.97	1.51	12.65	4.75
192	0.02	0					163	56.5	21.2654	1	60	3	0.8	2	0				5.31	1.54	5.02	1.27	25.2988	3.52	70.1195	2.77165	0.23	1.315	86.46	1.28	13.02	4.04
193	2	0					173	74	24.7252	1	53	2	1	1	0				4.81	1.9	4.48	0.96	21.4286	2.98	66.5179	3.10417	0.54	1.637	98.69	1.81	12.07	4.38
194	0.05	0					158	55	22.0317	2	49	2	1.1	3	0				5.55	1.78	3.59	0.8	22.2841	2.21	61.5599	2.7625	0.58	0.735	109.72	1.69	12.19	4.78
195	0.04	0					172	70	23.6614	1	55	2	4	3	0				4.48	3.45	4.53	0.92	20.3091	2.27	50.1104	2.46739	1.34	1.979	96.31	1.81	13.36	5.16
196	2	0					174	93	30.7174	1	59	3	3	3	0				5.26	2.44	2.62	0.79	30.1527	1.14	43.5115	1.44304	0.69	0.95	80.73	1.72	11.48	5.29
197	N	0					164	50	18.5901	2	33	1	0.6	2	1	5	8	62.5	4.77	0.81	4.53	1.22	26.9316	3.13	69.0949	2.56557	0.18	1.522	98.41	1.65	13.1	5.16
198	0.06	0					165	80.5	29.5684	2	36	2	0.4	1	0				5.55	1.56	5.84	1.12	19.1781	4.25	72.774	3.79464	0.47	3.564	81.4	1.42	12.54	4.22
199	0.5	0					166	58	21.048	2	38	2	1.1	1	1	2	6	33.3333	4.75	0.83	4.09	2.01	49.1443	1.7	41.5648	0.845771	0.38	2.53	76.27	1.83	10.29	4.43
200	0.2	0					161	55	21.2183	2	35	2	0.3	1	0				4.51	0.83	3.91	1.57	40.1535	2.01	51.4066	1.28025	0.33	1.348	123.34	1.15	12.87	4.93
201	N	0					148	51.5	23.5117	2	33	1	0.8	1	0				4.15	0.93	2.97	0.94	31.6498	1.78	59.9327	1.89362	0.25	1.428	93.86	1.84	12.99	4.6
202	0.1	0					160	68	26.5625	2	58	3	4	3	0				4.86	1.91	3.91	1.1	28.133	2.33	59.5908	2.11818	0.48	0.835	101.93	1.26	13.63	5.16
203	0.05	0					161	51.5	19.8681	2	31	1	1	2	1	8	15	53.3333	4.02	0.83	3.95	1.19	30.1266	2.41	61.0127	2.02521	0.35	0.875	105.28	1.57	16.13	3.85
204	2	0					162	56.5	21.5287	2	47	2	0.5	2	0				4.6	0.48	4.47	1.49	33.3333	2.78	62.1924	1.86577	0.2	0.984	84.88	1.89	11.09	5.18
205	1	0					160	47	18.3594	2	27	1	0.5	1	0				4.25	0.98	3.47	1.21	34.8703	1.98	57.0605	1.63636	0.28	0.008	103.89	1.67	16.1	4.99
206	0.1	0					172	71	23.9995	1	54	2	0.4	1	0				5.4	5.32	4.09	0.57	13.9364	1.57	38.3863	2.75439	1.95	1.63	136.89	1.58	12.88	4.5
207	N	0					157	50	20.2848	2	39	2	1	1	1	1	5	20	4.52	0.48	2.74	1.16	42.3358	1.4	51.0949	1.2069	0.18	1.504	105.67	1.54	11.9	4.8
208	1	0					154	53.5	22.5586	2	57	3	1	3	0				4.79	2.66	5.15	1.11	21.5534	3.18	61.7476	2.86486	0.86	1.268	95.75	1.41	13.13	4.7
209	N	0					160	60	23.4375	2	39	2	2.5	1	1	2	5	40	5.09	1.11	3.93	1.11	28.2443	2.38	60.5598	2.14414	0.44	0.435	100.66	1.59	12.03	4.22
210	5	0					160	62	24.2188	1	58	3	0.5	2	0				5.17	1.81	5.67	1.45	25.5732	3.79	66.843	2.61379	0.43	2.98	88.85	1.28	12.54	5.19
211	0.05	0					175	88	28.7347	1	52	2	0.4	1	0				4.5	1.47	3.89	0.89	22.8792	2.54	65.2956	2.85393	0.46	1.107	86.71	1.63	12.56	4.65
212	2	0					158	56	22.4323	2	53	2	0.6	1	0				5.29	1.18	4.93	1.6	32.4544	3.1	62.8803	1.9375	0.23	0.596	114.57	1.61	13.41	4.86
213	N	0					162	60	22.8624	2	33	1	0.3	1	0				4.46	1.24	4.57	1.15	25.1641	3.04	66.5208	2.64348	0.38	2.192	80.21	1.73	16.59	4.73
214	1	0					164	52	19.3337	2	34	1	0.4	3	0				5.47	0.57	3.77	1.56	41.3793	2.1	55.7029	1.34615	0.11	1.39	133.1	1.73	13.43	4.01
215	1	0					161	60	23.1473	2	46	2	1.1	2	0				3.85	1.24	5.3	1.1	20.7547	3.8	71.6981	3.45455	0.4	0.663	142.55	1.3	11.73	4.55
216	N	0					155	67.5	28.0957	2	69	3	1.3	1	0				4.94	1.93	5.04	1.26	25	3.08	61.1111	2.44444	0.7	1.051	88.96	1.84	14.33	5.43
217	0.1	0					160	51	19.9219	2	27	1	1.5	1	1	3	5	60	4.61	0.82	3.88	1.56	40.2062	2.2	56.701	1.41026	0.12	1.19	101.8	1.54	12.55	3.72
218	N	0					158	65	26.0375	2	56	3	0.4	1	0				5.54	1.8	5.18	0.99	19.112	3.61	69.6911	3.64646	0.58	1.874	131.97	1.6	11.97	4.64
219	0.1	0					163	46.5	17.5016	2	45	2	0.9	1	0				4.53	0.59	4.39	1.2	27.3349	2.72	61.959	2.26667	0.47	0.934	97.39	1.55	13.68	4.95
220	0.5	0					158	71	28.441	1	60	3	1.1	1	0				4.95	2.12	5.74	1.05	18.2927	4.03	70.2091	3.8381	0.66	0.875	119.8	1.78	14.67	4.47
221	0.1	0					175	67	21.8776	1	27	1	0.5	1	1	2	8	25	4.07	0.78	4.64	1.26	27.1552	2.87	61.8534	2.27778	0.51	0.849	120.62	1.4	12.84	4.13
222	0.1	0					160	64	25	2	45	2	2	1	1	4	4	100	4.35	1.92	5.7	1.13	19.8246	3.6	63.1579	3.18584	0.97	1.947	94	1.52	13.99	4.28
223	N	0					150	56	24.8889	2	66	3	0.4	1	0				4.39	1.39	3.95	0.91	23.038	2.33	58.9873	2.56044	0.71	2.131	102.93	1.72	11.3	4.5
224	0.1	0					160	55	21.4844	2	51	2	0.4	2	1	14	30	46.6667	4.8	0.67	3.95	1.44	36.4557	2.17	54.9367	1.50694	0.34	1.69	81.34	1.51	12.29	4.13
225	0.9	0					158	48	19.2277	2	54	2	1	2	1	1	10	10	4.73	0.82	4.56	1.5	32.8947	2.68	58.7719	1.78667	0.38	1.568	106.75	1.26	14.08	4.29
226	0.05	0					161	58	22.3757	2	54	2	1	3	0				4.87	2.3	6.16	1.44	23.3766	3.71	60.2273	2.57639	1.01	1.035	64.51	1.41	14.59	4.69
227	0.3	0					157	50	20.2848	2	50	2	0.4	1	0				4.93	1.57	4.44	1.07	24.0991	2.62	59.009	2.4486	0.75	2.607	104.82	1.49	15.63	4.78
228	0.2	1			1		158	63	25.2363	2	64	3	2	2	0				5	1.7	4.86	0.92	18.93	3.26	67.0782	3.54348	0.68	0.437	99.8	1.78	13	4.72
229	0.06	1	1			1	165	60	22.0386	2	53	2	0.8	3	1	1	4	25	5.19	2.61	5.21	1.23	23.6084	3	57.5816	2.43902	0.98	2.844	96.66	1.55	11.53	4.88
230	N	0					173	77	25.7276	1	53	2	0.5	1	1	2	7	28.5714	5.82	2.88	4.35	0.75	17.2414	2.57	59.0805	3.42667	1.03	1.178	118.75	1.76	11.84	4.04
231	N	0					174	80	26.4236	1	46	2	0.8	1	0				5.36	1.31	4.22	1.05	24.8815	2.57	60.9005	2.44762	0.6	0.873	83.74	1.47	13.2	4.05
232	0.5	1			1		157	45	18.2563	2	50	2	2	3	1	2	3	66.6667	5	0.72	5.65	1.85	32.7434	3.54	62.6549	1.91351	0.26	6.798	108.83	1.31	12.06	4.06
233	N	0					160	53	20.7031	2	37	2	0.7	1	1	1	5	20	4.83	1.07	3.57	1.18	33.0532	1.95	54.6218	1.65254	0.44	1.221	56.1	1.71	10.47	5.43
234	0.05	0					162	56	21.3382	2	39	2	0.4	1	1	2	7	28.5714	4.61	0.59	3.7	1.83	49.4595	1.61	43.5135	0.879781	0.26	1.385	104.65	1.26	11.65	4.84
235	N	0					160	48	18.75	2	49	2	0.5	1	0				4.48	0.95	4.77	1.57	32.914	2.98	62.4738	1.89809	0.22	0.783	93.48	2.16	13.04	4.81
236	1	0					165	52	19.1001	2	32	1	0.6	3	1	1	9	11.1111	4.37	0.53	3.36	1.45	43.1548	1.73	51.4881	1.1931	0.18	1.402	88.3	1.44	13.11	4.09
237	0.1	0					172	63	21.2953	2	26	1	0.9	1	1	7	10	70	4.4	0.74	3.68	1.16	31.5217	2.24	60.8696	1.93103	0.28	1.317	104.23	1.84	13.26	3.93
238	N	0					170	79	27.3356	1	29	1	4	2	1	5	16	31.25	5.7	1.05	4.01	0.87	21.6958	2.51	62.5935	2.88506	0.63	1.769	111.68	1.35	12.87	6.16
239	0.4	0					160	55	21.4844	2	58	3	0.9	1	1	3	4	75	5.03	1.73	4.51	1.17	25.9424	2.63	58.3149	2.24786	0.71	1.96	103.48	1.59	13.51	4.26
240	0.1	0					167	56	20.0796	1	34	1	1.8	1	1	2	3	66.6667	5.31	1.22	4.24	1.03	24.2925	2.57	60.6132	2.49515	0.64	1.458	107.51	1.55	14.66	4.15
241	2	0					159	54	21.3599	2	41	2	0.5	1	0				4.65	0.87	3.78	1.35	35.7143	1.92	50.7937	1.42222	0.51	2.041	101.34	1.31	13.62	4.89
242	0.1	0					170	69	23.8754	1	56	3	0.5	3	0				5.64	1.62	5.55	1.29	23.2432	3.44	61.982	2.66667	0.82
243	N	0					155	60	24.974	2	31	1	0.3	2	1	1	4	25	4.49	0.56	2.98	0.59	19.7987	1.94	65.1007	3.28814	0.45	3.974	108.38	1.63	12.01	4.74
244	0.5	0					160	50	19.5312	2	50	2	0.8	3	0				4.97	1.23	4.12	0.94	22.8155	2.41	58.4951	2.56383	0.77	1.925	89.5	1.64	10.08	4.21
245	2	0					158	57	22.8329	2	49	2	0.5	1	1	1	3	33.3333	4.3	1.22	4.97	1.3	26.1569	2.93	58.9537	2.25385	0.74	1.274	80.91	1.35	14.33	3.6
246	1	0					172	56	18.9292	2	34	1	0.6	1	1	6	16	37.5	4.81	0.7	4.59	1.33	28.976	2.56	55.7734	1.92481	0.7	1.28	103.3	1.55	11.04	3.93
247	0.1	1	1				155	49	20.3954	2	48	2	0.5	1	1	1	6	16.6667	4.18	0.84	3.83	1.62	42.2977	1.7	44.3864	1.04938	0.51	0.512	86.07	1.64	12.62	4.41
248	0.2	0					162	46	17.5278	2	28	1	0.7	1	0				4.74	1.07	5.49	1.8	32.7869	3.03	55.1913	1.68333	0.66	3.025	77.45	2.03	11.68	5.42
249	N	0					165	58	21.3039	2	57	3	0.7	3	0				5.12	1.35	3.31	0.88	26.5861	1.75	52.8701	1.98864	0.68	2.292	114.37	1.51	13.06	4.52
250	N	0					159	55	21.7555	2	39	2	2	1	1	1	20	5	5.14	0.71	3.38	1.23	36.3905	1.78	52.6627	1.44715	0.37	0.898	87.07	1.59	12.17	4.1
251	0.1	0					158	50	20.0288	2	56	3	1	2	0				5.17	1.15	5.38	1.36	25.2788	3.28	60.9665	2.41176	0.74	0.914	133.42	1.35	14.16	4.8
252	0.1	0					158	63.5	25.4366	2	25	1	0.4	1	0				5.17	0.96	4.56	1.06	23.2456	2.85	62.5	2.68868	0.65	1.046	116.65	1.69	13.65	4.85
253	0.1	0					149	60	27.0258	1	67	3	0.5	1	0				5.08	2.07	4.86	1.03	21.1934	2.81	57.8189	2.72816	1.02	1.009	99.68	1.85	12.11	4.94
254	0.05	0					172	53	17.9151	1	29	1	0.5	1	1	2	2	100	4.31	1.26	4.46	1.16	26.009	2.52	56.5022	2.17241	0.78	1.168	105.83	1.45	11.66	5.53
255	0.2	0					164	52	19.3337	2	29	1	0.5	1	0				4.54	0.65	4.25	1.62	38.1176	2	47.0588	1.23457	0.63	1.395	105.83	1.77	12.11	4.49
256	N	0					162	80	30.4832	2	47	2	0.6	1	0				4.69	0.98	3.39	1.08	31.8584	1.73	51.0324	1.60185	0.58	1.759	117.64	2.01	13.7	4.61
257	N	0					167	56	20.0796	2	34	1	1.3	3	1	3	13	23.0769	5.16	0.62	3.34	1.28	38.3234	1.52	45.509	1.1875	0.54	0.002	85.01	1.51	12.93	4.64
258	N	0					162	64	24.3865	2	68	3	0.5	1	0				4.77	1.13	4.91	1.18	24.0326	3.07	62.5255	2.60169	0.66	3.023	88.09	1.41	10.86	4.59
259	0.1	0					165	64	23.5078	2	30	1	0.7	3	0				4.94	0.98	3.78	0.99	26.1905	2.08	55.0265	2.10101	0.71	2.356	124.47	1.63	10.02	4.65
260	1	0					158	59	23.634	2	32	1	0.7	1	0				4.6	0.6	3.67	1.07	29.1553	2.15	58.5831	2.00935	0.45	1.271	59.33	1.28	14.62	4.02
261	0.2	0					164	59	21.9363	2	34	1	1	1	0				4.36	0.39	3.58	1.33	37.1508	1.86	51.9553	1.3985	0.39	1.038	99.92	1.84	14.61	4.22
262	0.1	0					175	72	23.5102	1	50	2	0.8	1	1	2	5	40	4.56	1.6	4.69	0.76	16.2047	2.91	62.0469	3.82895	1.02	1.44	113.28	2.27	13.23	6.16
263	0.4	0					153	65	27.7671	2	73	3	1.2	3	0				4.21	1.91	4.01	0.82	20.4489	2.21	55.1122	2.69512	0.98	1.579	88.77	1.55	11.28	4.75
264	N	0					156	56	23.0112	2	27	1	1	2	1	2	7	28.5714	4.3	0.66	3.08	1.11	36.039	1.51	49.026	1.36036	0.46	3.107	99.71	1.5	9.93	4.5
265	8	0					154	48	20.2395	2	47	2	0.6	1	0				5.19	1.01	5.23	1.17	22.3709	3.4	65.0096	2.90598	0.66	0.766	94.18	1.34	12.89	4.3
266	2	0					160	60.5	23.6328	2	42	2	1.1	2	0				4.35	1.4	4.38	1.1	25.1142	2.48	56.621	2.25455	0.8	1.908	83.21	1.27	12.43	3.64
267	0.2	0					172	76.5	25.8586	1	50	2	0.3	1	0				5.32	0.61	4.16	1.4	33.6538	2.19	52.6442	1.56429	0.57	1.315	93.59	1.85	10.96	4.92
268	0.6	0					173	79	26.3958	2	32	1	1.8	3	0				4.82	2.02	4.07	0.86	21.1302	2.12	52.0885	2.46512	1.09	2.047	84.1	1.46	11.57	3.99
269	0.1	0					160	69	26.9531	2	61	3	0.6	2	1	1	5	20	5.11	2.83	5.25	0.96	18.2857	3.14	59.8095	3.27083	1.15	1.149	66.82	1.51	11.81	4.71
270	0.1	0					153	58	24.7768	2	34	1	0.4	1	1	1	6	16.6667	4.48	1.11	4.73	1.2	25.37	3.36	71.0359	2.8	0.17	2.619	97.9	1.55	13.8	4.71
271	1	0					158	54	21.6311	2	50	2	0.3	1	0				4.9	0.83	4.18	1.05	25.1196	2.59	61.9617	2.46667	0.54	1.55	109.9	1.35	12.89	4.28
272	0.1	0					164	47	17.4747	2	38	2	0.6	1	0				4.29	0.66	5.5	1.92	34.9091	2.94	53.4545	1.53125	0.64	0.648	109.16	1.27	12.89	4.24
273	N	0					159	75	29.6665	2	44	2	0.3	2	0				4.29	0.84	3.7	1.17	31.6216	1.9	51.3514	1.62393	0.63	1.239	75.77	1.45	12.24	4.81
274	0.1	0					169	80	28.0102	1	47	2	0.6	2	1	7	9	77.7778	4.17	2.19	4.79	0.7	14.6138	2.93	61.1691	4.18571	1.16	1.034	94.85	1.51	12.79	3.37
275	1	1		1		1	160	68	26.5625	2	49	2	1	3	0				5.12	0.71	3.84	1.47	38.2812	1.87	48.6979	1.27211	0.5	2.028	75.66	1.76	11.72	5.25
276	0.1	0					168	66	23.3844	1	55	2	1.8	1	0				5.03	5.69	5.73	0.9	15.7068	1.87	32.6353	2.07778	2.96	1.29	107.04	1.36	13.06	4.4
277	2	0					155	48	19.9792	2	33	1	0.3	1	0				4.25	1.21	3.74	1.03	27.5401	1.97	52.6738	1.91262	0.74	2.11	97.56	1.65	11.27	4.19
278	N	0					179	82	25.5922	1	49	2	1	1	1	3	5	60	4.53	1.39	4.96	1.04	20.9677	2.91	58.6694	2.79808	1.01	1.356	119.7	1.77	12.09	5.18
279	0.1	0					168	74	26.2188	1	43	2	0.6	2	0				5.61	2.14	4.64	0.8	17.2414	2.78	59.9138	3.475	1.06	1.029	91.47	1.38	12.32	3.68
280	N	0					158	58	23.2335	2	53	2	0.4	3	0				5.13	0.72	3.29	1.13	34.3465	1.69	51.3678	1.49558	0.47	0.842	113.42	1.44	13.11	2.83
281	0.5	0					162	60	22.8624	2	33	1	0.5	3	0				4.66	0.68	4.32	1.24	28.7037	2.4	55.5556	1.93548	0.68	1.021	99.25	1.07	14.57	5.3
282	0.02	0					163	59.5	22.3945	2	36	2	2	2	0				4.58	1.05	6.08	1.23	20.2303	3.84	63.1579	3.12195	1.01	3.127	122.47	1.07	14.77	3.93
283	0.1	1	1		1		152	55	23.8054	2	33	1	1.5	3	1	14	64	21.875	5.39	1.01	5.56	1.27	22.8417	3.52	63.3094	2.77165	0.77	1.154	109.85	1.71	13.39	4.58
284	0.2	0					166	77	27.9431	1	53	2	1.5	1	1	4	8	50	5.47	1.36	5.3	1.35	25.4717	3.26	61.5094	2.41481	0.69	3.428	88.03	1.64	11.11	5.14
285	N	0					161	71	27.3909	2	67	3	1.6	1	0				4.81	1.56	5.47	0.99	18.0987	3.42	62.5229	3.45455	1.06	1.249	118.88	1.34	13.2	3.71
286	N	0					172	95	32.112	1	34	1	0.8	2	1	2	10	20	4.78	2.84	4.89	0.68	13.9059	3.09	63.1902	4.54412	1.12	1.52	111.48	1.31	12.31	4.19
287	N	0					172	80	27.0416	1	52	2	1.8	1	1	2	2	100	5.44	1.21	4.55	1.28	28.1319	2.49	54.7253	1.94531	0.78	1.057	121.17	1.71	12.9	5.15
288	N	0					170	75	25.9516	2	47	2	0.8	3	1	7	21	33.3333	4.75	0.62	4.09	1.31	32.0293	2.23	54.5232	1.70229	0.55	2.984	97.97	1.74	12.05	3.5
289	3	0					158	45	18.026	2	33	1	0.6	1	0				4.74	0.96	3.57	1.33	37.2549	1.79	50.1401	1.34586	0.45	0.956	102.19	1.53	12.52	4.87
290	8	0					173	72	24.0569	1	63	3	0.6	2	0				4.85	1.07	2.61	0.66	25.2874	1.38	52.8736	2.09091	0.57	0.608	86.75	1.19	13.12	4.61
291	0.3	0					158	74	29.6427	2	35	2	0.4	2	1	1	4	25	5.11	0.61	3.58	1.14	31.8436	1.98	55.3073	1.73684	0.46	2.188	92.63	1.28	13.41	4.72
292	0.2	0					162	53.5	20.3856	2	50	2	0.2	1	1	1	10	10	5.01	1.02	4.92	1.41	28.6585	2.88	58.5366	2.04255	0.63	0.873	95.36	1.67	11.12	4.87
293	0.5	0					160	60	23.4375	2	46	2	0.8	1	1	4	5	80	4.83	0.58	5.54	1.35	24.3682	3.54	63.8989	2.62222	0.65	1.323	102.29	1.5	11.88	5.16
294	0.2	0					179	80	24.968	1	54	2	1.6	2	1	2	4	50	5.71	0.99	4.81	1.22	25.3638	2.83	58.8358	2.31967	0.76	0.901	89.02	1.38	11.22	5.31
295	0.05	0					156	52.5	21.573	2	56	3	1.2	2	1	2	7	28.5714	5.59	1.66	4.73	0.97	20.5074	2.84	60.0423	2.92784	0.92	1.783	96.98	1.38	12.5	3.81
296	7	0					158	55	22.0317	2	60	3	0.4	1	0				5.14	1.4	4.81	1.39	28.8981	2.73	56.7568	1.96403	0.69	1.593	74.74	1.54	13.19	4.93
297	0.1	0					158	60	24.0346	2	69	3	1.5	2	1	8	55	14.5455	5.77	1	4.96	1.38	27.8226	2.98	60.0806	2.15942	0.6	0.578	86.11	1.79	13.87	5.43
298	N	0					157	51.5	20.8933	2	28	1	1.5	2	1	3	24	12.5	4.17	0.51	4.39	1.81	41.2301	2.27	51.7084	1.25414	0.31	1.001	68.02	1.52	12.45	5.03
299	0.9	0					167	63	22.5896	2	39	2	0.6	1	0				4.92	0.95	4.54	1.37	30.1762	2.63	57.9295	1.91971	0.54	0.619	81.72	1.55	12.72	4.89
300	0.05	0					162	56.5	21.5287	2	33	1	0.7	1	0				5.46	0.61	3.4	1.18	34.7059	1.76	51.7647	1.49153	0.46	1.273	110.73	1.61	11.92	4.91
301	0.1	0					155	85	35.3798	2	35	2	1	3	1	2	4	50	5.15	1.92	5.44	0.93	17.0956	3.39	62.3162	3.64516	1.12	2.989	114.27	1.16	11.71	3.96
302	0.6	0					163	64	24.0882	2	54	2	0.6	1	0				5.42	1.05	2.77	1.18	42.5993	1.09	39.3502	0.923729	0.5	1.422	86.61	1.9	11.5	4.28
303	N	0					155	49.5	20.6035	2	35	2	0.7	1	0				5.18	0.76	3.52	1.15	32.6705	2.02	57.3864	1.75652	0.35	1.123	93.46	1.41	12.9	5.44
304	2	0					175	71	23.1837	1	28	1	1.8	2	1	1	1	100	4.56	1.52	4.29	0.91	21.2121	2.74	63.8695	3.01099	0.64	1.155	74.05	1.32	13.77	4.25
305	2	0					164	65	24.1672	2	57	3	0.5	1	0				4.37	1.01	4.63	1.59	34.3413	2.43	52.4838	1.5283	0.61	0.978	101.53	1.43	13.19	4.99
306	6	0					157	56	22.719	2	59	3	0.8	3	1	6	21	28.5714	6.29	5.5	5.96	0.77	12.9195	2.41	40.4362	3.12987	2.78	0.652	97.72	1.6	12.97	4.3
307	0.05	0					162	57	21.7193	2	53	2	1.5	3	1	2	9	22.2222	5	1.29	2.37	0.8	33.7553	0.99	41.7722	1.2375	0.58	1.632	87.56	1.61	11.26	5.48
308	1	0					156	59	24.2439	2	34	1	0.3	1	0				4.58	0.78	3.9	1.02	26.1538	2.42	62.0513	2.37255	0.46	0.639	85.19	1.17	13.22	4.54
309	1	0					168	77	27.2817	2	48	2	0.5	2	0				4.84	1.35	3.17	0.72	22.7129	1.82	57.4132	2.52778	0.63	1.063	106.44	1.22	18.28	3.97
310	0.04	0					168	80	28.3447	1	28	1	0.5	1	0				4.96	6.63	4.73	0.75	15.8562	2.14	45.2431	2.85333	1.84	0.95	92.7	1.45	12.81	4.53
311	N	0					152	46	19.91	2	43	2	0.6	1	0				5.13	1.22	5.04	1.16	23.0159	3.16	62.6984	2.72414	0.72	1.404	79.33	1.7	11.45	5.03
312	0.1	0					166	69.5	25.2214	1	44	2	1.7	1	0				6.11	0.7	4.79	1.12	23.382	3.15	65.762	2.8125	0.52	0.927	143.94	1.47	12.99	5.38
313	0.1	0					158	59.5	23.8343	2	49	2	0.4	1	0				4.97	0.92	4.58	1.45	31.6594	2.52	55.0218	1.73793	0.61	1.551	93.48	1.31	14.82	4.5
314	2	0					167	53	19.0039	2	28	1	0.7	1	0				4.51	0.85	3.96	1.7	42.9293	1.82	45.9596	1.07059	0.44	1.002	81.84	1.42	15	4.84
315	0.1	0					162	45	17.1468	2	27	1	0.7	2	0				5.1	0.57	3.31	1.08	32.6284	1.73	52.2659	1.60185	0.5	2.575	93.86	1.54	11.28	4.87
316	N	0					182	87	26.2649	1	59	3	1.5	1	0				6.24	0.97	4.35	1.32	30.3448	2.43	55.8621	1.84091	0.6	1.102	91.17	1.16	14.69	3.87
317	N	0					160	57.5	22.4609	2	51	2	1.2	1	1	3	23	13.0435	5.15	1.29	4	1.2	30	2.27	56.75	1.89167	0.53	2.787	117.51	1.41	15.79	4.12
318	0.1	0					161	56	21.6041	2	44	2	2.9	1	0				4.49	0.99	3.8	1.12	29.4737	2.11	55.5263	1.88393	0.57	1.294	63.35	1.78	11.04	4.86
319	0.2	0					173	75	25.0593	1	36	2	1.6	2	1	8	15	53.3333	4.93	1.79	3.65	0.97	26.5753	1.97	53.9726	2.03093	0.71	2.036	94.79	1.99	11	4.85
320	N	0					173	65	21.7181	2	30	1	0.4	1	1	1	15	6.66667	5.09	1.54	4.42	1.19	26.9231	2.49	56.3348	2.09244	0.74	0.933	99.23	1.36	12.39	4.6
321	N	0					150	52	23.1111	2	78	3	0.3	1	0				6.67	2.49	3.95	1.09	27.5949	1.77	44.8101	1.62385	1.09
322	0.1	0					168	55	19.487	2	55	2	0.6	1	0				5	1.02	4.19	2.11	50.358	1.7	40.5728	0.805687	0.38	3.811	102.51	1.45	13.26	4.37
323	0.1	0					177	59	18.8324	1	36	2	1	1	0				5.13	0.69	4.56	1.56	34.2105	2.62	57.4561	1.67949	0.38	0.81	65.99	1.65	11.5	4.7
324	3	0					160	58	22.6562	2	59	3	0.6	1	0				5.17	1.2	4.94	0.92	18.6235	3.31	67.004	3.59783	0.71	1.673	91.76	1.99	8.49	5.64
325	0.1	0					168	73	25.8645	1	44	2	1.5	3	1	5	6	83.3333	6.11	1.33	3.08	0.61	19.8052	1.8	58.4416	2.95082	0.67	1.588	92.8	1.65	13.88	4.94
326	0.4	0					161	52	20.061	2	40	2	3.5	2	1	1	38	2.63158	5.08	0.6	4.5	1.55	34.4444	2.49	55.3333	1.60645	0.46	2.099	115.71	1.69	12.5	4.44
327	N	0					170	80	27.6817	1	57	3	0.8	1	0				5.24	1.22	2.8	0.69	24.6429	1.58	56.4286	2.28986	0.53	2.542	108.38	1.64	15.27	4.58
328	0.5	0					152	51	22.0741	2	61	3	0.5	2	0				5.43	2.36	6.79	1.01	14.8748	4.5	66.2739	4.45545	1.28	2.088	78.54	1.62	11.4	4.66
329	1	0					162	64	24.3865	2	51	2	0.3	1	0				5.42	1.08	5.13	1.35	26.3158	3.13	61.0136	2.31852	0.65	0.91	83.56	1.56	12.75	4.26
330	8	0					162	65	24.7676	2	37	2	2	2	0				5.46	0.86	4.42	0.94	21.267	2.96	66.9683	3.14894	0.52	2.504	90.69	1.75	12.41	5.07
331	2	0					160	57.5	22.4609	2	45	2	0.8	1	0				4.25	0.73	3.86	1.66	43.0052	1.85	47.9275	1.11446	0.35	0.606	84.59	1.68	11.29	3.97
332	1	0					160	55	21.4844	2	53	2	0.6	1	0				4.51	1.57	4.97	1.45	29.1751	2.79	56.1368	1.92414	0.73	0.807	108.06	1.6	12.64	4.54
333	0.2	0					170	65	22.4913	1	39	2	0.8	2	0				5.38	1.93	3.14	0.79	25.1592	1.59	50.6369	2.01266	0.76	1.222	94.33	1.43	12.77	4.26
334	4	0					152	66	28.5665	2	46	2	0.8	2	0				5.41	2.74	5.1	1.03	20.1961	2.98	58.4314	2.8932	1.09	3.709	101.47	1.56	12.14	4.24
335	N	0					158	50	20.0288	2	56	3	1.5	2	0				5.79	1.01	6.06	1.55	25.5776	3.8	62.7063	2.45161	0.71	1.265	109.8	1.69	11.75	5.03
336	0.1	0					158	50	20.0288	2	61	3	1.3	1	0				4.84	2.46	5.15	1	19.4175	3.08	59.8058	3.08	1.07	2.48	72.8	1.5	11.71	4.95
337	10	1			1		155	45.5	18.9386	2	63	3	0.6	1	0				4.72	1.31	4.9	1.03	21.0204	3.3	67.3469	3.20388	0.57	2.398	138.61	1.44	12.04	4.49
338	1.5	0					155	45	18.7305	2	69	3	2	1	1	1	14	7.14286	4.75	1.49	4.35	1.52	34.9425	2.17	49.8851	1.42763	0.66	0.57	101.2	1.21	14.34	4.05
339	N	0					158	56.5	22.6326	2	63	3	1.2	2	0				5.59	0.63	2.74	1.22	44.5255	1.14	41.6058	0.934426	0.38	1.464	72.3	1.19	12.18	4.35
340	N	0					162	72.5	27.6254	2	45	2	0.6	1	1	1	4	25	5.85	1.05	5.09	1.42	27.8978	2.97	58.3497	2.09155	0.7	1.864	87.83	1.45	9.77	5.28
341	0.3	0					156	44	18.0802	2	29	1	0.3	1	0				4.7	0.73	3.23	1.43	44.2724	1.41	43.6533	0.986014	0.39	1.029	72.35	2.03	11.97	4.27
342	0.1	0					152	55	23.8054	2	53	2	0.3	2	0				4.28	1.49	3.79	1.1	29.0237	2	52.7704	1.81818	0.69	1.98	106.15	1.52	15.24	5.33
343	2	0					146	44	20.6418	2	49	2	1.1	1	0				5.14	0.58	4.23	1.58	37.3522	2.29	54.1371	1.44937	0.36	1.262	78.94	1.84	12.43	5.19
344	0.1	0					158	67.5	27.0389	2	43	2	0.7	1	1	1	2	50	4.67	2.41	4.27	0.8	18.7354	2.38	55.7377	2.975	1.09	1.232	111.38	1.95	10.76	4.4
345	N	0					160	60	23.4375	2	41	2	1	1	0				4.97	1.37	4.31	1.13	26.2181	2.52	58.4687	2.23009	0.66	2.956	98.81	1.5	13.72	4.48
346	0.1	0					163	64	24.0882	2	57	3	1.2	2	0				4.52	3.66	4.28	0.85	19.8598	2.05	47.8972	2.41176	1.38	0.547	132.49	1.36	11.5	5.32
347	0.02	0					158	63	25.2363	2	78	3	0.7	1	0				6.07	1.64	4.29	0.95	22.1445	2.49	58.042	2.62105	0.85	1.905	82.36	1.7	11.35	4.49
348	3	0					163	73	27.4756	2	50	2	0.4	2	0				5.06	0.74	3.34	1.02	30.5389	1.82	54.491	1.78431	0.5	1.898	103.43	1.95	12.75	3.88
349	N	0					164	61	22.68	2	43	2	0.5	1	0				5.02	0.82	4.59	1.62	35.2941	2.4	52.2876	1.48148	0.57	1.693	104.6	1.28	11.7	5.4
350	0.1	0					161	64	24.6904	2	58	3	1.2	3	0				5	1.2	4.98	1.24	24.8996	2.99	60.0402	2.41129	0.75	1.95	100.22	1.86	13.47	5.04
351	1	0					155	51	21.2279	2	42	2	0.4	2	1	1	4	25	5.09	1.17	3.65	1.04	28.4932	1.97	53.9726	1.89423	0.64	2.127	100.89	2	14.67	5.4
352	0.1	0					152	50	21.6413	2	64	3	0.2	1	0				5.29	2.73	5.35	0.85	15.8879	3.05	57.0093	3.58824	1.45	0.427	84.45	2.06	14.11	4.66
353	2	0					160	57	22.2656	2	58	3	0.7	1	0				5.96	0.95	4.72	0.94	19.9153	2.99	63.3475	3.18085	0.79	2.772	91.87	1.59	12.06	4.79
354	1	0					150	46	20.4444	2	59	3	1.7	2	0				5.07	1.06	6.07	1.16	19.1104	3.98	65.5684	3.43103	0.93	1.481	98.34	1.65	13.83	4.63
355	N	0					155	47	19.563	2	65	3	0.5	1	0				4.42	1.16	5.97	1.77	29.6482	3.34	55.9464	1.88701	0.86	1.158	99.85	1.65	12.25	4.45
356	0.05	0					161	55	21.2183	2	54	2	1.3	3	1	1	21	4.7619	5.53	1.27	5.09	1.18	23.1827	3.11	61.1002	2.63559	0.8	0.823	90.75	1.86	12.45	4.99
357	N	0					156	52	21.3675	2	30	1	1.1	3	1	4	5	80	4.55	0.86	3.8	1.13	29.7368	2.01	52.8947	1.77876	0.66	0.835	131.4	1.69	14.49	4.64
358	0.1	0					161	52	20.061	2	28	1	0.8	2	1	2	2	100	4.23	0.95	3.41	1.11	32.5513	1.7	49.8534	1.53153	0.6	1.368	77.11	1.22	11.03	5.58
359	N	0					157	48	19.4734	2	41	2	3	1	1	8	16	50	4.58	0.47	3.81	1.52	39.895	1.85	48.5564	1.21711	0.44	2.325	104.23	1.9	11.24	4.25
360	0.1	1		1			169	92	32.2118	1	31	1	1	1	1	6	20	30	4.52	3.64	4.43	0.9	20.316	2.38	53.7246	2.64444	1.15	0.716	99.17	1.4	12.51	4.64
361	0.5	0					157	58	23.5304	2	49	2	1.2	1	1	2	18	11.1111	4.6	0.99	5.47	1.28	23.4004	3.65	66.7276	2.85156	0.54	1.31	78.43	1.2	12.04	4.63
362	0.1	1	1				158	46.5	18.6268	2	22	1	1.5	1	1	11	28	39.2857	4.28	0.5	3.47	1.21	34.8703	1.93	55.6196	1.59504	0.33	1.587	90.05	1.73	11.41	4.69
363	N	0					154	62	26.1427	2	67	3	0.6	1	0				5.16	1.33	4.94	1.16	23.4818	3.17	64.17	2.73276	0.61	2.025	62.13	1.76	11.59	5.39
364	0.05	0					153	47	20.0777	2	30	1	0.8	1	1	1	11	9.09091	5.23	0.54	4.01	1.2	29.9252	2.39	59.601	1.99167	0.42	2.755	77.49	1.44	11.29	3.84
365	0.3	0					166	66	23.9512	2	24	1	0.4	3	1	1	5	20	4.85	1.05	4.56	1.08	23.6842	2.84	62.2807	2.62963	0.64	0.574	112.05	1.42	11.86	4.36
366	0.1	0					156	59	24.2439	2	52	2	0.3	2	0				4.92	1.36	4.64	1.57	33.8362	2.76	59.4828	1.75796	0.31
367	0.3	0					154	52	21.9261	2	40	2	0.4	1	0				4.9	0.81	4.23	1.46	34.5154	2.39	56.5012	1.63699	0.38	0.777	72.47	1.59	14.93	5.16
368	0.2	0					164	52	19.3337	2	24	1	2	1	0				4.98	0.66	3.87	1.41	36.4341	2.18	56.3307	1.5461	0.28	3.604	102.54	1.37	12.54	4.62
369	0.5	0					160	65	25.3906	1	35	2	1.5	2	1	11	15	73.3333	4.74	2.08	3.01	0.82	27.2425	1.26	41.8605	1.53659	0.93	0.858	92.36	1.75	15.59	4.36
370	N	0					168	78	27.6361	1	62	3	0.3	1	0				5.22	2.34	5.03	1.19	23.6581	3.15	62.6243	2.64706	0.69	1.069	112.3	1.62	12.27	4.46
371	N	0					155	50	20.8117	2	49	2	0.5	1	0				4.12	1.22	4.63	1.29	27.8618	2.87	61.987	2.22481	0.47	1.272	101.6	1.56	14.51	4.47
372	1	0					173	75	25.0593	1	43	2	0.7	1	1	2	8	25	4.72	3.35	6.41	0.81	12.6365	4.36	68.0187	5.38272	1.24	1.499	98.17	1.23	12.08	4.15
373	N	0					155	42	17.4818	2	45	2	1	1	0				3.99	0.91	3.87	1.16	29.9742	2.2	56.8475	1.89655	0.51	1.405	97.39	1.58	11.19	4.26
374	N	0					160	55	21.4844	2	34	1	0.7	1	0				3.88	0.84	3.39	1.01	29.7935	2.04	60.177	2.0198	0.34	2.165	106.07	1.89	12.1	4.67
375	0.02	1	1				160	60	23.4375	1	59	3	0.7	2	0				4.09	0.91	2.86	0.87	30.4196	1.56	54.5455	1.7931	0.43	0.295	84.93	1.6	11.46	4.47
376	N	0					160	65	25.3906	2	53	2	0.6	1	0				5.09	1.95	4.04	0.94	23.2673	2.34	57.9208	2.48936	0.76	1.251	84.59	1.85	15.12	4.96
377	0.03	0					173	60	20.0474	1	37	2	2.2	2	1	5	6	83.3333	4.67	0.59	3.67	1.11	30.2452	2.18	59.4005	1.96396	0.38	3.196	84.46	1.36	13.8	5.03
378	N	0					153	65	27.7671	2	61	3	0.8	2	1	1	4	25	5.11	2.03	5.07	1	19.7239	3.28	64.6943	3.28	0.79	3.376	114.21	1.5	11.93	4.95
379	5	0					160	52	20.3125	2	52	2	0.5	1	0				4.93	0.83	4.56	1.33	29.1667	2.86	62.7193	2.15038	0.37	1.641	86.59	1.43	11.71	3.56
380	N	0					175	80	26.1224	1	51	2	1.4	1	0				5.01	1.47	4.37	0.8	18.3066	2.84	64.9886	3.55	0.73	1.003	87.97	1.53	11.96	4.75
381	1.5	0					171	56	19.1512	2	27	1	1	1	1	5	13	38.4615	4.56	0.58	2.97	1.22	41.0774	1.36	45.7912	1.11475	0.39	1.024	98.12	1.63	12.49	4.89
382	0.1	0					156	55	22.6003	2	59	3	0.6	1	0				5	1.2	5.13	1.27	24.7563	3.2	62.3782	2.51969	0.66	1.242	90.52	1.62	14.41	5.37
383	N	0					159	59	23.3377	2	51	2	0.6	1	0				5.1	1.37	3.43	0.9	26.2391	1.91	55.6851	2.12222	0.62	0.934	79.59	1.4	13.13	4.71
384	0.04	0					162	75	28.578	2	41	2	1.2	2	0				4.67	2.2	4.08	1.01	24.7549	2.32	56.8627	2.29703	0.75	1.776	98.97	1.61	11.41	4.89
385	3	0					162	52	19.8141	2	45	2	1	2	0				5.49	0.73	3.36	1.14	33.9286	1.93	57.4405	1.69298	0.29	1.35	97.44	1.6	13.04	4.43
386	0.05	0					150	40	17.7778	2	59	3	1.2	1	1	1	3	33.3333	5.77	0.88	4.77	1.6	33.543	2.47	51.782	1.54375	0.7	2.043	88.25	1.25	12.88	4.49
387	N	0					158	62	24.8358	2	62	3	0.6	1	0				4.95	1.72	3.87	0.99	25.5814	2.09	54.0052	2.11111	0.79	0.983	99.01	1.46	14.07	5.22
388	1	0					160	42	16.4062	2	27	1	4	1	1	6	31	19.3548	4.59	0.62	4.31	1.79	41.5313	2.03	47.0998	1.13408	0.49	1.108	86.98	1.82	12.7	5.48
389	N	0					153	51	21.7865	2	57	3	1	1	1	1	4	25	4.68	0.76	5.34	1.49	27.9026	3.26	61.0487	2.18792	0.59	1.644	98.15	1.51	11.15	4.41
390	N	0					161	61	23.533	2	46	2	0.8	1	0				4.99	1.17	4.14	1.1	26.57	2.29	55.314	2.08182	0.75	2.662	100.26	1.82	13.31	4.77
391	0.05	1		1			154	53	22.3478	2	62	3	1	1	0				5.56	0.78	3.98	1.26	31.6583	2.19	55.0251	1.7381	0.53	0.998	106.82	1.61	13.84	4.61
392	0.1	0					160	56.5	22.0703	2	40	2	1	1	0				4.6	0.79	3.7	1.01	27.2973	2.16	58.3784	2.13861	0.53	1.677	108.25	1.69	11.55	4.74
393	N	0					159	48	18.9866	2	56	3	0.5	3	0				4.72	1.23	4.68	1.25	26.7094	2.7	57.6923	2.16	0.73	2.235	86.49	2.12	10.99	5.45
394	N	0					172	65	21.9713	1	40	2	0.9	1	0				4.27	1.38	3.57	1.14	31.9328	1.72	48.1793	1.50877	0.71	0.801	85.31	1.54	13.42	4.85
395	0.9	0					160	63	24.6094	2	50	2	0.5	1	0				4.39	0.65	3.43	0.99	28.863	1.89	55.102	1.90909	0.55	0.484	89.49	1.86	10.24	5.14
396	0.1	1		1			166	58	21.048	2	30	1	1.2	2	1	2	2	100	4.11	0.66	3.21	1.27	39.5639	1.58	49.2212	1.24409	0.36	1.773	84.27	2.14	12.15	5.79
397	0.1	1	1				166	71	25.7657	2	53	2	3	2	0				5.43	7.37	5.34	0.71	13.2959	1.15	21.5356	1.61972	3.48	1.242	106.19	1.53	11.48	4.82
398	0.1	0					170	61	21.1073	2	28	1	2	1	1	5	8	62.5	4.62	0.72	4.21	1.29	30.6413	2.46	58.4323	1.90698	0.46	0.791	125.08	1.23	11.27	4.02
399	2	0					150	44	19.5556	2	37	2	0.9	1	1	4	5	80	4.41	0.47	3.15	1.3	41.2698	1.43	45.3968	1.1	0.42	1.038	92.22	2.14	12.73	3.85
400	0.4	0					161	75	28.9341	1	36	2	0.8	2	0				5.34	2.2	5.27	0.88	16.6983	3.34	63.3776	3.79545	1.05	0.855	86.37	1.28	11.25	4.56
401	0.4	0					158	57	22.8329	2	46	2	0.9	3	0				4.55	0.97	3.45	0.94	27.2464	2.02	58.5507	2.14894	0.49	0.979	92.37	1.75	13.34	3.9
402	6	0					166	63	22.8625	2	40	2	0.4	1	0				4.93	0.73	3.46	1.03	29.7688	1.94	56.0694	1.8835	0.49	1.221	70.35	1.92	12.56	5.7
403	5	0					161	57	21.9899	2	34	1	1.3	1	1	2	10	20	4.76	0.77	4.09	1.23	30.0733	2.37	57.9462	1.92683	0.49	0.738	118.06	1.78	12.69	4.59
404	0.1	0					180	81	25	1	36	2	3	2	1	9	16	56.25	5.32	5.6	6.11	0.67	10.9656	3.51	57.4468	5.23881	1.93	2.531	77.99	1.9	10.07	4.92
405	0.1	0					166	72	26.1286	2	59	3	0.3	2	0				5.1	2.45	5.18	1	19.305	3.09	59.6525	3.09	1.09	3.085	77.85	1.73	12.27	5.81
406	2	1	1				160	48	18.75	2	27	1	1.5	2	1	6	19	31.5789	4.89	0.64	3.9	1.57	40.2564	1.82	46.6667	1.15924	0.51	1.668	118.24	1.72	10.82	4.74
407	N	0					160	55	21.4844	2	37	2	1.7	1	0				4.83	1.24	4.89	1.31	26.7894	2.76	56.4417	2.10687	0.82	0.815	103.93	1.48	12.02	4.63
408	N	0					179	98	30.5858	1	29	1	0.3	1	0				4.88	1.27	3.06	0.87	28.4314	1.6	52.2876	1.83908	0.59	1.132	90.23	1.61	10.54	4.23
409	0.1	0					166	47.5	17.2376	2	29	1	0.5	1	0				4.55	0.43	3.23	1.44	44.582	1.38	42.7245	0.958333	0.41	1.49	89.23	2.05	12.94	4.74
410	N	0					180	82	25.3086	1	53	2	0.4	1	0				5.38	1.74	5.34	1.05	19.6629	3.21	60.1124	3.05714	1.08	2.756	106.92	2.17	11.71	5.63
411	0.6	0					155	54	22.4766	2	31	1	1	1	0				4.64	0.63	3.2	1.25	39.0625	1.59	49.6875	1.272	0.36	2.969	103.21	1.24	9.96	4.07
412	N	0					159	60	23.7332	2	49	2	0.8	1	0				5.31	0.95	4.86	1.28	26.3374	2.96	60.9053	2.3125	0.62	0.523	110.38	1.32	13.02	5.35
413	N	0					150	44	19.5556	2	39	2	1.2	1	0				4.62	0.7	3.86	1.16	30.0518	2.18	56.4767	1.87931	0.52	1.002	93.54	1.47	13.83	3.61
414	6	0					155	54	22.4766	2	45	2	1	1	0				5.16	1.62	4.52	0.94	20.7965	2.67	59.0708	2.84043	0.91	2.123	103.78	2.02	12.13	3.95
415	N	0					162	57	21.7193	2	30	1	0.3	1	0				5.06	0.69	3.78	1.42	37.5661	1.84	48.6772	1.29577	0.52	2.057	103.82	1.26	12.72	3.44
416	0.03	0					159	53	20.9644	2	59	3	1.5	2	0				4.33	2.51	4.03	1.06	26.3027	1.9	47.1464	1.79245	1.07	1.123	99.36	1.62	11.75	4.41
417	N	0					154	61	25.721	2	63	3	0.4	1	0				5.54	1.96	3.86	0.99	25.6477	2.01	52.0725	2.0303	0.86	2.031	119.76	1.74	12.23	4.42
418	2	0					150	50	22.2222	2	59	3	1.5	2	0				5.33	4.56	6.43	1.09	16.9518	3.23	50.2333	2.9633	2.11	1.045	89.67	1.88	11.84	5.13
419	N	0					153	52.5	22.4273	2	47	2	1	1	0				5.06	0.71	3.52	1.36	38.6364	1.82	51.7045	1.33824	0.34	0.787	111.01	1.51	12.56	4.35
420	0.5	0					169	65	22.7583	2	57	3	0.3	1	0				4.85	1.38	4.11	1.4	34.0633	2.17	52.7981	1.55	0.54	3.825	72.39	2	13.13	4.75
421	N	0					160	61.5	24.0234	2	54	2	1.3	1	1	4	11	36.3636	4.83	1.54	4.21	1.13	26.8409	2.37	56.2945	2.09735	0.71	0.002	91.7	1.62	11.21	5.2
422	0.1	0					168	81	28.699	2	43	2	0.7	3	0				5.4	0.78	4.95	1.75	35.3535	2.72	54.9495	1.55429	0.48	1.175	109.74	1.91	16.38	5.3
423	0.06	0					155	57	23.7253	2	54	2	0.7	1	0				5.25	0.88	4	1.07	26.75	2.46	61.5	2.29907	0.47	1.339	80.68	1.63	11.83	4.44
424	N	0					158	51.5	20.6297	2	55	2	1	1	0				5.24	1.08	4.33	1.52	35.1039	2.29	52.8868	1.50658	0.52	1.501	92.7	1.45	12.47	4.49
425	0.1	0					149	41	18.4676	2	73	3	1.5	2	1	1	5	20	5.09	0.69	3.64	1.1	30.2198	2.13	58.5165	1.93636	0.41	1.161	88.96	1.47	12.33	4.58
426	N	0					155	45	18.7305	2	67	3	0.3	1	0				6.65	0.53	3.39	1.51	44.5428	1.52	44.8378	1.00662	0.36	1.013	129.88	1.93	14.68	5
427	0.1	0					160	57	22.2656	2	62	3	1	1	0				4.92	1.25	4.47	1.44	32.2148	2.39	53.4676	1.65972	0.64	1.538	113.36	1.58	12.57	4.34
428	0.2	1			1		155	52	21.6441	2	42	2	0.6	2	0				5.63	0.73	3.59	0.84	23.3983	2.28	63.5097	2.71429	0.47	1.072	104.84	1.48	12.86	4.72
429	0.1	0					160	47	18.3594	2	38	2	0.4	2	0				4.55	0.81	4.09	1.54	37.6528	2.01	49.1443	1.30519	0.54	2.531	105.29	1.69	11.2	4.89
430	N	0					160	58.5	22.8516	2	57	3	0.4	3	0				5.68	0.85	5.28	1.46	27.6515	3.15	59.6591	2.15753	0.67	1.526	99.22	1.76	13.76	4.62
431	4	0					152	42.5	18.3951	2	30	1	0.4	1	0				5.57	1.28	4.83	1.05	21.7391	3.03	62.7329	2.88571	0.75	2.169	86.01	2.07	8.98	4.33
432	0.2	0					162	72	27.4348	2	53	2	0.7	2	0				4.88	3.45	4.11	0.89	21.6545	1.83	44.5255	2.05618	1.39	1.045	98.43	1.39	11.99	3.82
433	N	0					156	60	24.6548	2	42	2	0.8	1	0				4.65	1.58	5.68	1.17	20.5986	3.51	61.7958	3	1	2.005	110.75	2.03	11.87	5.11
434	N	0					168	67	23.7387	1	44	2	0.6	1	0				4.76	5.73	5.4	0.92	17.037	2.57	47.5926	2.79348	1.91	0.769	110.98	1.67	10.8	4.98
435	0.5	1		1			176	66	21.3068	1	56	3	0.5	1	0				5.18	0.91	3.53	1.21	34.2776	1.82	51.5581	1.50413	0.5	2.178	92.01	1.72	10.55	5
436	N	0					156	57	23.4221	2	56	3	0.4	1	0				6.62	2.04	4.61	1.03	22.3427	2.59	56.1822	2.51456	0.99	1.846	137.79	1.68	11.95	4.3
437	0.3	0					170	70.5	24.3945	1	54	2	0.3	1	0				4.97	0.64	4.07	1.21	29.7297	2.36	57.9853	1.95041	0.5	1.389	100.96	1.56	10.68	4.55
438	0.2	0					160	59.5	23.2422	2	41	2	0.9	2	0				4.54	1.55	3.59	0.98	27.2981	1.98	55.1532	2.02041	0.63	1.377	105.37	1.56	9.86	4.64
439	N	0					178	92	29.0367	1	41	2	1	1	0				4.95	2.87	5.91	0.9	15.2284	3.72	62.9442	4.13333	1.29	1.21	102.91	1.16	13.86	3.97
440	0.5	0					166	57	20.6852	2	26	1	0.6	1	0				4.73	0.76	3.74	1.26	33.6898	2.04	54.5455	1.61905	0.44	2.377	107.08	1.47	15.25	3.89
441	N	0					153	70	29.903	2	71	3	0.4	1	0				4.44	3.18	3.75	0.76	20.2667	1.6	42.6667	2.10526	1.39	1.795	87.12	1.49	11.85	4.02
442	0.2	0					152	56.5	24.4546	2	62	3	0.6	1	0				5.13	2.08	4.82	1.25	25.9336	2.7	56.0166	2.16	0.87	1.759	92.25	1.49	11.31	4.73
443	0.1	0					167	62.5	22.4103	1	55	2	1.6	1	1	6	8	75	4.64	2.49	2.88	0.67	23.2639	1.38	47.9167	2.0597	0.83	1.559	79.15	0.72	12.99	4.37
444	0.1	0					164	65	24.1672	2	54	2	1	2	0				5.31	1.01	3.14	0.99	31.5287	1.77	56.3694	1.78788	0.38	0.071	80.88	1.3	13.46	4.32
445	5	1			1		158	57	22.8329	2	52	2	1.3	2	0				4.75	5.66	4.47	0.79	17.6734	1.83	40.9396	2.31646	1.85	1.392	91.84	1.78	12.59	2.41
446	3	0					164	60.5	22.4941	1	46	2	0.5	2	0				4.5	1.16	4.08	0.8	19.6078	2.52	61.7647	3.15	0.76	0.894	103.41	1.52	14.12	4.67
447	0.1	0					174	77	25.4327	1	31	1	0.6	1	1	2	14	14.2857	4.71	0.59	5.14	1.14	22.179	3.32	64.5914	2.91228	0.68	0.776	98.44	1.61	12.81	4.67
448	N	0					160	60	23.4375	2	45	2	0.7	2	1	2	15	13.3333	5.02	1.28	3.89	1.37	35.2185	1.91	49.1003	1.39416	0.61	1.47	93.24	1.51	12.02	4.51
449	0.3	0					158	55	22.0317	2	58	3	0.7	1	0				5.36	1.94	6.89	1.28	18.5776	4.52	65.6023	3.53125	1.09	2.171	95.41	1.45	12.2	3.97
450	2	0					158	50	20.0288	2	55	2	1	2	0				4.52	1.51	5.11	1.08	21.135	3.26	63.7965	3.01852	0.77	1.002	97.21	1.42	13.09	4.08
451	0.1	1				1	152	51.5	22.2905	2	59	3	0.8	1	1	2	5	40	5.13	1.62	4.01	0.97	24.1895	2.39	59.601	2.46392	0.65	1.731	105.31	1.41	13.64	4.63
452	0.3	0					150	60	26.6667	2	51	2	0.8	1	0				5.08	1.91	6.27	1.2	19.1388	4.07	64.9123	3.39167	1	1.691	85.35	1.74	13.3	4.1
453	0.2	0					150	51	22.6667	2	54	2	1	3	1	1	7	14.2857	4.84	1.64	4.76	0.77	16.1765	3.25	68.2773	4.22078	0.74	2.297	93.73	1.38	12.55	4.29
454	0.1	0					158	52.5	21.0303	2	59	3	1	1	1	10	39	25.641	4.74	3.22	4.29	0.84	19.5804	2.05	47.7855	2.44048	1.4	1.55	97.58	1.49	13.14	3.65
455	2	0					162	60	22.8624	2	46	2	1.5	2	1	1	6	16.6667	5.53	4.31	4.39	0.97	22.0957	1.99	45.3303	2.05155	1.43	1.021	95.81	1.32	11.85	4.42
456	0.5	0					158	47	18.8271	2	57	3	0.8	2	0				4.71	1.45	4.25	1.09	25.6471	2.55	60	2.33945	0.61	1.242	126.42	1.59	12.66	4.29
457	6	0					161	59	22.7615	2	46	2	1	1	0				5.28	1.63	3.41	0.95	27.8592	1.72	50.4399	1.81053	0.74	2.092	79.94	1.3	11.48	4.44
458	0.2	0					155	65	27.0552	2	58	3	0.5	1	0				5.7	2.02	4.47	0.94	21.0291	2.62	58.613	2.78723	0.91	1.667	94.13	1.41	13.34	4.15
459	0.4	0					158	50	20.0288	2	31	1	0.6	1	0				4.16	0.69	5.02	1.52	30.2789	2.88	57.3705	1.89474	0.62	1.917	104.06	1.33	12.61	4.18
460	3	0					161	43	16.5889	2	45	2	0.6	1	0				4.94	0.88	3.45	1.4	40.5797	1.63	47.2464	1.16429	0.42	0.893	94.49	2.17	13.61	7.09
461	0.2	0					166	47	17.0562	2	38	2	1	1	1	1	3	33.3333	4.71	0.95	5.82	1.82	31.2715	3.52	60.4811	1.93407	0.48	1.261	103.46	1.66	12.45	4.87
462	0.1	0					168	73	25.8645	2	47	2	0.7	3	0				4.38	0.78	4.22	1.54	36.4929	2.25	53.3175	1.46104	0.43	0.891	94.2	1.65	13.22	4.4
463	3	0					162	58	22.1003	2	39	2	1.3	1	0				4.26	0.65	3.67	1.58	43.0518	1.78	48.5014	1.12658	0.31	1.264	94.15	1.7	12.46	4.36
464	N	0					167	56	20.0796	2	37	2	1	1	0				5	0.93	4.23	1.7	40.1891	2.22	52.4823	1.30588	0.31	2.9	95.57	1.6	13.08	5
465	0.4	0					163	70	26.3465	2	39	2	1	2	0				5.72	0.89	4.18	0.99	23.6842	2.82	67.4641	2.84848	0.37	1.977	96.02	1.57	11.15	4.55
466	3	0					163	56.5	21.2654	2	32	1	1	1	0				5.14	0.57	3.36	1.49	44.3452	1.67	49.7024	1.12081	0.2	0.851	99.04	1.54	11.42	5.23
467	20	0					166	52.5	19.0521	2	65	3	1	2	1	1	2	50	5.27	1.39	6.07	1.66	27.3476	3.82	62.9325	2.3012	0.59	1.326	108.63	1.69	13.3	4.88
468	3	0					160	48	18.75	2	39	2	0.3	2	0				4.71	0.92	3.57	1.36	38.0952	1.9	53.2213	1.39706	0.31	0.859	109.68	1.87	14.34	5.15
469	3	0					167	70	25.0995	1	53	2	1.2	2	1	2	3	66.6667	5.04	1.05	4.15	1.13	27.2289	2.43	58.5542	2.15044	0.59	1.21	105.47	1.77	11.35	4.04
470	0.2	0					176	59	19.047	1	48	2	0.3	3	1	1	2	50	5.08	0.56	3	1.52	50.6667	1.28	42.6667	0.842105	0.2	1.295	111.52	1.73	14.49	4.37
471	0.05	0					160	75	29.2969	2	46	2	0.5	1	0				4.73	0.7	4.41	1.41	31.9728	2.58	58.5034	1.82979	0.42	2.118	91.85	1.69	13.96	4.89
472	0.3	0					159	60	23.7332	2	52	2	0.5	2	1	4	8	50	5.04	1.18	4.82	1.4	29.0456	2.9	60.166	2.07143	0.52	1.167	91.04	2.12	11.24	4.72
473	0.3	0					156	57	23.4221	2	48	2	1	1	0				4.86	1.47	4.32	1.6	37.037	2.16	50	1.35	0.56	1.192	96.11	1.43	12.51	4.28
474	0.1	0					170	60	20.7612	1	65	3	0.5	1	0				5.18	1.68	3.83	1.12	29.2428	2.05	53.5248	1.83036	0.66	1.985	104.93	1.24	13.76	4.61
475	0.1	0					156	56	23.0112	2	62	3	0.9	1	0				4.7	1.17	3.94	1.28	32.4873	2.13	54.0609	1.66406	0.53	1.435	88.57	1.65	13.83	4.47
476	0.02	0					157	60	24.3418	2	56	3	0.3	2	0				4.68	1.27	3.73	1.06	28.4182	2.1	56.3003	1.98113	0.57	1.892	72.42	1.54	10.98	4.39
477	0.1	1			1		164	79	29.3724	2	54	2	2	1	0				4.63	1.36	4.2	0.85	20.2381	2.83	67.381	3.32941	0.52	1.631	87.56	1.58	12.17	4.96
478	3	0					155	43	17.898	2	59	3	1	2	0				5.26	0.69	4.79	1.65	34.4468	2.74	57.2025	1.66061	0.4	2.01	87.93	1.42	12.14	4.68
479	0.05	0					170	65	22.4913	2	36	2	1	1	0				5.25	0.89	2.91	0.78	26.8041	1.82	62.543	2.33333	0.31	4.557	74.35	1.85	10.94	4.67
480	0.5	0					149	46	20.7198	2	58	3	1	2	0				4.84	1.01	4.37	1.43	32.7231	2.43	55.6064	1.6993	0.51	2.104	73.49	1.49	11.89	4.49
481	3	0					156	71	29.1749	2	43	2	1.1	2	0				5.5	1.21	4.05	1.16	28.642	2.4	59.2593	2.06897	0.49	1.46	80.64	1.24	10.32	4.54
482	0.1	0					180	70	21.6049	1	35	2	0.6	1	1	2	2	100	4.9	1.57	5.19	1.34	25.8189	3.26	62.8131	2.43284	0.59	1.781	100.02	1.56	13.51	4.4
483	0.1	0					160	53	20.7031	2	71	3	0.8	1	0				6.1	0.92	3.59	1.43	39.8329	1.72	47.9109	1.2028	0.44	1.572	80.95	1.33	11.9	4.6
484	0.1	0					154	65	27.4077	1	59	3	1	3	0				5.63	1.56	4	0.99	24.75	2.4	60	2.42424	0.61	1.387	120	1.37	14.71	4.6
485	0.2	1			1		158	60	24.0346	2	52	2	0.6	3	0				5.42	1.04	4.83	1.51	31.2629	2.79	57.764	1.84768	0.53	1.673	80.38	1.39	12.09	5.4
486	0.05	0					158	45.5	18.2262	2	37	2	0.6	2	1	2	3	66.6667	4.71	0.51	4.18	1.89	45.2153	1.98	47.3684	1.04762	0.31	2.673	77.07	1.69	11.07	5.45
487	1	1	1				153	49.5	21.1457	2	49	2	0.5	1	0				4.84	0.66	3.79	1.38	36.4116	2.04	53.8259	1.47826	0.37	1.689	106.13	1.32	10.77	5.05
488	0.2	1	1				175	52	16.9796	1	34	1	1.2	2	1	17	31	54.8387	4.37	1.23	4.67	1.39	29.7645	2.71	58.03	1.94964	0.57	1.176	79.86	1.73	13.53	4.6
489	0.5	0					170	75	25.9516	1	55	2	0.8	1	0				5.49	3.3	4.62	0.91	19.697	2.51	54.329	2.75824	1.2	1.273	93.91	1.66	11.53	4.7
490	0.2	0					165	65	23.8751	1	47	2	0.6	1	0				4.66	1.86	3.36	0.91	27.0833	1.93	57.4405	2.12088	0.52	0.695	68.07	1.14	12.86	4.74
491	1	0					163	54	20.3244	2	41	2	0.5	3	1	1	9	11.1111	4.73	1.36	4.3	0.97	22.5581	2.71	63.0233	2.79381	0.62	2.041	112.04	1.52	11	4.23
492	1	0					168	73	25.8645	1	50	2	0.2	1	0				5.67	1.58	3.89	0.91	23.3933	2.34	60.1542	2.57143	0.64	1.31	104.47	1.23	12.26	4
493	5	1			1		169	60	21.0077	1	35	2	0.9	2	0				4.52	1.02	5.31	1.39	26.177	3.29	61.9586	2.36691	0.63	1.852	78.33	1.61	13.49	4.05
494	0.2	0					165	48	17.6309	2	48	2	0.7	1	0				5.51	2.38	4.36	0.7	16.055	2.75	63.0734	3.92857	0.91	1.009	94.76	1.27	13.29	4.62
495	13	0					172	78	26.3656	1	42	2	1	1	0				5.22	4.28	5.84	0.93	15.9247	3.4	58.2192	3.65591	1.51	1.271	98.43	1.25	13.68	5.23
496	1	0					150	57	25.3333	2	51	2	0.5	1	1	1	5	20	5	1.59	4.86	1.03	21.1934	3.03	62.3457	2.94175	0.8	1.486	81.06	1.7	14.55	5.11
497	N	0					158	45	18.026	2	29	1	0.7	1	1	1	4	25	4.9	0.72	4.92	1.64	33.3333	2.97	60.3659	1.81098	0.31	1.172	95.59	1.41	12.64	3.9
498	3	0					161	49	18.9036	2	40	2	1	1	1	1	7	14.2857	4.97	0.76	3.78	1.16	30.6878	2.28	60.3175	1.96552	0.34	2.428	88.45	1.6	11.25	4.21
499	0.2	1		1	1		160	75.6	29.5312	2	57	3	1	1	0				4.58	2.08	4.64	0.93	20.0431	2.64	56.8966	2.83871	1.07	1.571	73.01	1.93	12.09	4.91
500	0.3	0					162	80	30.4832	2	35	2	0.5	2	0				5.32	1.9	5.21	1.31	25.144	3.02	57.9655	2.30534	0.88	3.776	115.52	1.78	10.4	4.51
501	0.1	1	1	1			165	78	28.6501	2	34	1	1.3	2	1	12	12	100	4.92	2.23	3.32	1.13	34.0361	1.35	40.6627	1.19469	0.84	3.47	105.91	1.25	9.59	4.93
502	N	0					165	54	19.8347	2	56	3	0.4	3	0				4.79	1.68	5.28	1.03	19.5076	3.21	60.7955	3.1165	1.04	2.724	107.03	1.75	12.47	4.58
503	0.3	0					159	51.5	20.371	2	33	1	0.4	2	1	6	22	27.2727	4.53	0.63	4.32	1.37	31.713	2.5	57.8704	1.82482	0.45	1.853	105.1	1.32	11.77	4.64
504	0.1	0					160	57	22.2656	2	48	2	1.1	3	0				5.01	1.06	3.73	0.87	23.3244	2.31	61.9303	2.65517	0.55	1.746	102.67	1.39	11.73	4.7
505	8	0					175	77	25.1429	1	57	3	0.5	1	1	1	6	16.6667	4.97	2.46	6.11	1.22	19.9673	3.55	58.1015	2.90984	1.34	2.393	97.14	1.38	14.45	4.65
506	0.4	0					155	65	27.0552	2	51	2	2	1	0				4.36	0.94	3.98	1.6	40.201	1.99	50	1.24375	0.39	3.346	92.12	1.53	14.81	4.15
507	0.1	0					156	60	24.6548	2	74	3	0.7	1	0				4.98	1.46	5	0.96	19.2	3.4	68	3.54167	0.64	1.226	91.6	1.48	13.42	4.06
508	0.1	0					167	62	22.231	2	38	2	1.4	2	1	7	36	19.4444	5.12	0.86	3.76	1.33	35.3723	2.05	54.5213	1.54135	0.38	0.465	100.45	1.28	12.1	4.4
509	1	0					162	50	19.052	2	38	2	1	2	0				4.42	0.97	4.54	1.59	35.022	2.51	55.2863	1.57862	0.44	1.065	108.19	1.73	10.94	4.78
510	0.1	0					159	68	26.8977	2	55	2	0.5	2	0				4.45	2.16	6.08	1.26	20.7237	4.01	65.9539	3.18254	0.81	2.107	78.5	1.27	11.65	4.83
511	1	0					168	77	27.2817	1	31	1	1.4	3	1	5	6	83.3333	4.89	2.5	4.73	0.78	16.4905	2.93	61.945	3.75641	1.02	1.23	78.23	1.56	12.83	4.56
512	0.3	0					170	53	18.3391	1	39	2	1.8	1	1	1	6	16.6667	5.03	0.76	3.57	1.19	33.3333	2.02	56.5826	1.69748	0.36	1.218	103.55	1.61	13.27	4.3
513	N	0					161	51	19.6752	2	40	2	0.4	1	0				4.42	0.43	4.39	1.79	40.7745	2.4	54.6697	1.34078	0.2	0.956	110.36	1.48	12.7	4.64
514	3	0					158	55	22.0317	2	45	2	0.5	3	0				5.36	1.31	3.25	0.92	28.3077	1.83	56.3077	1.98913	0.5	1.431	106.11	1.53	13.42	4.08
515	0.3	0					160	57	22.2656	2	47	2	0.5	1	0				4.34	1.02	4.38	1.02	23.2877	2.73	62.3288	2.67647	0.63	1.057	80.5	1.87	11.79	4.55
516	0.5	0					158	65	26.0375	2	35	2	0.6	1	1	2	3	66.6667	4.6	1.33	4.5	0.83	18.4444	2.92	64.8889	3.51807	0.75	1.21	95.83	1.36	13.25	4.86
517	0.03	0					160	56	21.875	2	33	1	0.5	1	0				5.07	0.85	3.93	1.12	28.4987	2.31	58.7786	2.0625	0.5	1.599	89.6	1.49	12.55	4.58
518	0.1	1	1				155	54	22.4766	2	45	2	0.5	2	0				4.85	1.1	4.39	1.15	26.1959	2.74	62.4146	2.38261	0.5	0.916	119.51	1.48	10.78	4.35
519	0.2	0					156	60	24.6548	2	61	3	0.7	3	0				5.13	1.31	4.73	1.37	28.9641	2.71	57.2939	1.9781	0.65	1.647	91.83	1.16	12.92	3.78
520	1	0					175	85	27.7551	1	60	3	0.6	1	0				6.2	1.55	4.78	1.5	31.3808	2.65	55.4393	1.76667	0.63	0.002	94.8	1.52	15.18	4.2
521	0.1	0					158	56	22.4323	2	51	2	0.7	3	0				4.86	1.12	2.68	0.96	35.8209	1.14	42.5373	1.1875	0.58	0.825	113.44	1.94	13.6	4.84
522	6	0					157	62	25.1532	2	51	2	0.4	1	0				4.91	1.43	3.74	0.93	24.8663	2.23	59.6257	2.39785	0.58	1.294	98.82	1.74	12.9	4.67
523	0.3	1		1			159	58	22.9421	2	56	3	1.6	2	0				4.6	1.34	5.1	1.22	23.9216	3.18	62.3529	2.60656	0.7
524	0.6	0					158	48.5	19.428	2	39	2	0.4	3	1	1	5	20	4.74	0.45	4.35	1.2	27.5862	2.61	60	2.175	0.54	2.13	80.09	1.28	12.25	4.07
525	1	0					150	45	20	2	58	3	0.8	1	1	1	2	50	4.6	0.86	4.18	1.22	29.1866	2.43	58.134	1.9918	0.53	0.51	117.33	1.94	11.68	4.84
526	0.04	0					165	61.5	22.5895	2	46	2	0.5	1	0				5.69	0.82	4.47	1.93	43.1767	2.09	46.7562	1.0829	0.45	1.33	125.45	1.81	11.78	3.63
527	N	0					160	59	23.0469	2	66	3	1.4	3	0				4.99	1.28	4.16	1.67	40.1442	1.96	47.1154	1.17365	0.53	1.706	102.52	2.28	12.01	4.52
528	0.1	0					160	61	23.8281	2	58	3	0.3	1	0				5.1	2.29	5.49	1.46	26.5938	2.7	49.1803	1.84932	1.33	0.815	96.95	1.37	12.65	4.19
529	0.05	0					163	52.5	19.7599	2	54	2	0.5	3	0				5.55	0.69	2.98	1.12	37.5839	1.5	50.3356	1.33929	0.36	1.71	101.03	1.95	14.33	5.27
530	0.3	0					170	65	22.4913	1	41	2	0.5	1	0				4.65	0.83	3.33	1.12	33.6336	1.84	55.2553	1.64286	0.37	1.191	129.31	1.59	13.26	4.45
531	0.1	0					160	54	21.0938	2	49	2	0.8	3	0				5.04	1.46	3.11	0.91	29.2605	1.73	55.627	1.9011	0.47	2.725	88.6	1.57	10.56	3.76
532	0.2	1			1		158	56	22.4323	2	41	2	1.2	1	0				4.73	0.74	4.22	1.3	30.8057	2.45	58.0569	1.88462	0.47	1.34	107.83	1.74	13.7	4.5
533	3	0					172	74.5	25.1825	1	59	3	0.8	3	1	1	5	20	4.85	1.22	4.67	1.19	25.4818	2.86	61.242	2.40336	0.62	6.769	89.24	1.43	9.89	4.27
534	1.5	0					160	50	19.5312	2	53	2	1	2	1	2	4	50	5.2	0.81	3.4	1.21	35.5882	1.8	52.9412	1.4876	0.39	1.356	93.19	1.79	13.91	5.02
535	N	0					168	63.5	22.4986	1	62	3	0.4	1	0				5.19	1.41	6.33	1.15	18.1675	4.3	67.9305	3.73913	0.88	0.992	120.51	1.48	12.88	4.99
536	0.02	0					177	70.5	22.5031	1	23	1	2	3	1	1	1	100	5.31	1.01	4.65	1.34	28.8172	2.75	59.1398	2.05224	0.56	0.6	99.83	1.45	11.79	4.47
537	0.2	0					182	89	26.8687	1	50	2	1.6	3	1	10	14	71.4286	4.47	1.86	3.72	0.88	23.6559	2.16	58.0645	2.45455	0.68	0.961	98.19	1.33	14.9	4.18
538	0.05	0					170	70	24.2215	1	39	2	0.3	1	0				4.88	1.42	4.13	0.97	23.4867	2.64	63.9225	2.72165	0.52	1.055	91.87	1.56	14.93	3.84
539	0.1	0					167	66.5	23.8445	2	47	2	1.1	3	1	1	3	33.3333	5.36	3.3	4.73	1.11	23.4672	1.93	40.8034	1.73874	1.69	0.652	81.32	1.56	12.75	4.46
540	0.7	0					160	54	21.0938	2	35	2	1.3	2	0				4.84	0.59	4.12	1.97	47.8155	1.98	48.0583	1.00508	0.17	0.856	88.82	1.67	13.56	4.52
541	0.5	0					161	58	22.3757	2	41	2	0.4	2	0				5.06	0.9	3.99	1.44	36.0902	2.11	52.8822	1.46528	0.44	1.27	117.45	1.4	12.07	5.63
542	0.1	0					175	75	24.4898	1	25	1	0.3	1	0				5.3	1.04	4.07	1.08	26.5356	2.47	60.688	2.28704	0.52	0.828	108.88	1.37	13.5	3.82
543	0.4	0					160	67	26.1719	2	47	2	1.1	3	0				6.57	1.69	5.64	1.4	24.8227	3.33	59.0426	2.37857	0.91	3.042	96.13	1.38	12.08	4.9
544	0.3	0					154	58	24.4561	2	69	3	0.3	1	0				4.83	1.28	5.55	1.51	27.2072	3.46	62.3423	2.29139	0.58	1.038	82.48	1.75	12.59	5.14
545	0.1	0					158	55	22.0317	2	54	2	0.6	2	0				4.85	2.33	4.12	1.01	24.5146	2.12	51.4563	2.09901	0.99	1.122	108.17	1.3	13	4.26
546	0.5	0					155	50	20.8117	2	39	2	0.5	1	1	5	11	45.4545	4.93	0.85	3.63	1.12	30.854	2.25	61.9835	2.00893	0.26	0.791	68.34	1.59	13.29	4.21
547	1	0					163	52	19.5717	2	59	3	0.9	2	1	2	8	25	4.96	1.2	5.75	1.42	24.6957	3.88	67.4783	2.73239	0.45	0.542	88.96	2	11.1	5.2
548	0.1	0					170	64	22.1453	1	39	2	0.8	1	1	1	1	100	5.52	1.24	3.95	1.18	29.8734	2.44	61.7722	2.0678	0.33	0.567	78.62	1.36	11.12	4.34
549	1	0					160	69	26.9531	1	43	2	0.7	1	0				4.7	1.58	3.74	0.99	26.4706	2.23	59.6257	2.25253	0.52	1.156	97.66	1.53	12.05	4.01
550	0.4	0					150	68	30.2222	2	58	3	0.6	1	0				3.96	1.21	4.29	1.26	29.3706	2.45	57.1096	1.94444	0.58	2.09	83.23	1.72	12.94	3.94
551	0.1	0					165	60	22.0386	2	49	2	0.6	2	0				5.56	1.71	4.3	1.75	40.6977	2.04	47.4419	1.16571	0.51	0.932	93.77	1.52	16.35	4.33
552	0.1	0					165	67.5	24.7934	2	24	1	0.6	3	1	1	2	50	5.06	1.53	4.21	1.15	27.3159	2.55	60.5701	2.21739	0.51	0.923	99.64	1.56	16.18	4.68
553	0.3	0					160	70	27.3438	2	42	2	0.7	1	0				4.75	1.78	5.09	1.23	24.165	3.19	62.6719	2.5935	0.67	3.356	109.17	1.64	11.2	4.57
554	N	0					168	68	24.093	1	49	2	0.3	1	1	2	5	40	5.51	1.36	4.83	1.02	21.118	3.35	69.3582	3.28431	0.46	2.61	96.92	1.52	13.38	4.19
555	N	0					157	60	24.3418	2	56	3	0.3	1	0				5.15	2.35	5.41	0.98	18.1146	3.51	64.8799	3.58163	0.92	0.606	87.75	1.31	12.99	3.95
556	6	0					168	63.5	22.4986	2	43	2	0.7	1	0				4.66	0.65	3.25	1.42	43.6923	1.67	51.3846	1.17606	0.16	0.798	106.13	1.84	14.15	4.58
557	1	0					156	57	23.4221	2	61	3	1	1	0				5.07	1.57	5.21	1.04	19.9616	3.35	64.2994	3.22115	0.82	1.784	119.03	1.3	13.23	4.36
558	0.1	0					158	49	19.6283	2	53	2	1	1	0				5.59	0.97	3.88	1.46	37.6289	2.1	54.1237	1.43836	0.32	1.597	81.41	1.6	13.35	5.08
559	0.1	0					158	60	24.0346	2	45	2	1	1	0				4.88	0.64	5.06	1.23	24.3083	3.45	68.1818	2.80488	0.38	1.111	101.08	1.67	12.66	4.11
560	1	1		1			157	52	21.0962	2	55	2	0.3	2	0				5.21	1.17	5.62	1.96	34.8754	3.4	60.4982	1.73469	0.26	3.57	101.44	1.7	12.37	4.35
561	N	0					165	67	24.6097	1	50	2	0.3	1	1	1	4	25	5.24	0.9	5.22	1.22	23.3716	3.59	68.7739	2.94262	0.41	0.685	105.29	1.59	11.51	4.65
562	0.1	0					165	58	21.3039	1	49	2	0.4	1	0				5.01	1.19	6.13	1.26	20.5546	4.15	67.6998	3.29365	0.72	0.713	94.72	1.23	13.8	4.62
563	0.1	0					165	67	24.6097	2	32	1	1.2	2	1	3	9	33.3333	5.2	1.07	4.31	1.04	24.1299	2.9	67.2854	2.78846	0.37	1.812	108.02	1.7	13.85	4.51
564	0.1	0					168	69.5	24.6244	1	52	2	0.5	2	0				4.64	1.73	3.38	0.87	25.7396	1.89	55.9172	2.17241	0.62	1.294	120.18	1.29	14.08	3.79
565	0.2	0					155	55	22.8928	2	52	2	0.8	1	0				4.7	2.19	4.89	0.9	18.4049	3.23	66.0532	3.58889	0.76	0.674	60.75	1.52	12.99	4.14
566	0.3	0					155	44	18.3143	2	53	2	0.5	2	0				5.13	0.53	4.65	1.33	28.6022	3.15	67.7419	2.36842	0.17	2.468	139.14	1.48	13.98	5
567	0.1	0					154	45	18.9745	2	45	2	0.3	1	0				5.28	0.52	4.59	1.67	36.3834	2.64	57.5163	1.58084	0.28	0.908	135.01	1.49	11.89	4.97
568	1	0					168	70	24.8016	2	38	2	0.8	3	0				4.79	0.47	3.7	1.6	43.2432	1.86	50.2703	1.1625	0.24	1.841	105.7	1.39	13.16	4.9
569	1.5	0					150	42.5	18.8889	2	70	3	0.8	3	0				5.31	2.58	4.93	1.3	26.3692	2.73	55.3753	2.1	0.9	0.664	75.52	1.41	11.5	4.13
570	1	0					155	60.5	25.1821	2	72	3	1.1	2	0				4.76	2.43	3.99	1.27	31.8296	2.06	51.6291	1.62205	0.66	0.198	105.27	1.43	12.48	3.89
571	0.7	1		1			156	51	20.9566	2	56	3	2.5	2	0				4.65	1.44	4.56	1.24	27.193	2.86	62.7193	2.30645	0.46	1.714	71.62	1.96	10.8	3.8
572	0.1	0					160	56	21.875	2	25	1	0.2	2	0				5.1	0.83	3.52	1.17	33.2386	1.97	55.9659	1.68376	0.38	1.368	78.99	1.55	11.94	4.59
573	N	0					170	77	26.6436	2	56	3	1.2	3	0				5.37	1.54	4.89	1.26	25.7669	3.02	61.7587	2.39683	0.61	1.96	92.89	1.65	11.77	4.29
574	0.4	0					175	89	29.0612	1	35	2	0.7	3	1	1	19	5.26316	5.52	1.19	5.13	0.86	16.7641	3.58	69.7856	4.16279	0.69	1.887	112.23	1.44	13.18	4.87
575	0.1	0					160	55	21.4844	2	50	2	0.5	1	1	2	6	33.3333	5.71	2.57	4.72	0.94	19.9153	2.76	58.4746	2.93617	1.02	1.388	77.97	1.23	13.19	4.35
576	5	0					170	78	26.9896	2	51	2	0.5	1	0				4.77	0.63	3.34	1.35	40.4192	1.79	53.5928	1.32593	0.2	2.308	84.11	1.88	10.66	4.72
577	N	0					158	57	22.8329	2	38	2	2	1	1	1	21	4.7619	4.76	0.89	4.47	1.68	37.5839	2.55	57.047	1.51786	0.24	1.134	84.51	1.34	13.47	4.06
578	1	0					174	61	20.148	1	69	3	2	2	1	1	7	14.2857	5.79	0.74	3.55	1.27	35.7746	2.1	59.1549	1.65354	0.18	1.247	132.2	1.32	13.25	4.38
579	0.2	0					155	43.5	18.1061	2	47	2	1	2	0				4.77	1.05	3.83	1.35	35.248	2.19	57.1802	1.62222	0.29	1.742	98.77	1.81	12.99	4.61
580	0.4	1			1		169	57	19.9573	2	41	2	1.3	3	1	2	2	100	4.77	0.72	3.27	1.16	35.474	1.8	55.0459	1.55172	0.31	0.976	109	1.35	12.91	4.07
581	1	0					164	48	17.8465	2	32	1	0.7	1	1	3	3	100	5.54	0.87	3.85	1.58	41.039	2.04	52.987	1.29114	0.23	1.877	92.29	1.06	13.54	4.57
582	0.5	0					157	53	21.5019	2	47	2	0.7	2	1	1	5	20	4.5	1.21	4.81	1.84	38.2536	2.34	48.6486	1.27174	0.63	1.255	106.44	1.39	12.1	4.87
583	5	1		1			150	52	23.1111	2	74	3	1	1	0				4.87	1.09	3.87	1.03	26.615	2.24	57.8811	2.17476	0.6	2.015	93.34	1.39	13	4.05
584	0.02	0					160	55	21.4844	2	61	3	1	1	1	4	8	50	4.29	0.44	4.82	1.77	36.722	2.76	57.2614	1.55932	0.29	0.809	87.24	1.86	11.21	4.45
585	2	0					167	66.5	23.8445	2	61	3	1	3	0				5.07	1.27	3.63	1.06	29.2011	2.11	58.1267	1.99057	0.46	1.255	78.35	1.08	11.94	4.98
586	3	0					158	52.5	21.0303	2	58	3	0.5	1	1	1	4	25	3.95	0.4	4.5	1.65	36.6667	2.73	60.6667	1.65455	0.12	2.872	91.57	1.6	11.95	4.44
587	6	0					162	75	28.578	2	34	1	2	2	1	4	21	19.0476	4.34	1.38	4.65	0.98	21.0753	3.1	66.6667	3.16327	0.57	1.621	91.34	1.26	12.91	4.87
588	0.1	0					165	65	23.8751	2	57	3	1.4	3	0				4.98	3.16	4.35	0.85	19.5402	2.05	47.1264	2.41176	1.45	1.065	74.75	1.31	12.74	4.07
589	0.02	1		1			157	52	21.0962	2	73	3	1.5	3	0				5.2	1.9	7.04	1.21	17.1875	4.86	69.0341	4.01653	0.97	2.823	99.08	1.6	13.02	4.76
590	N	0					153	53	22.6409	2	39	2	0.2	1	0				4.75	1.58	4.99	1.63	32.6653	2.93	58.7174	1.79755	0.43	0.782	77.08	1.4	13.75	5
591	N	0					150	52.5	23.3333	2	54	2	1.1	1	0				5.37	0.8	4.29	1.26	29.3706	2.64	61.5385	2.09524	0.39	0.821	108.92	1.73	12.86	4.24
592	N	0					168	65	23.03	2	58	3	0.4	2	0				5.27	2.8	5.11	0.94	18.3953	3.04	59.4912	3.23404	1.13	1.163	118.53	1.48	12.28	3.95
593	5	0					162	53	20.1951	2	34	1	1.1	2	1	1	6	16.6667	5.16	1.16	4.4	1.17	26.5909	2.83	64.3182	2.4188	0.4	1.045	83.66	1.55	11.39	4.32
594	N	0					160	70	27.3438	2	47	2	0.6	1	0				5.26	1.16	5.17	1.49	28.8201	3.2	61.8956	2.14765	0.48	1.282	96.57	1.24	12.63	4.26
595	N	0					150	56	24.8889	2	36	2	2	3	0				5.53	0.64	3.78	1.29	34.127	2.2	58.2011	1.70543	0.29	0.812	94.21	1.36	13.25	4.52
596	2	0					147	47	21.7502	2	41	2	0.6	4	1	1	8	12.5	4.4	0.78	3.87	1.08	27.907	2.26	58.3979	2.09259	0.53	0.757	91.84	1.94	13.43	4.56
597	0.1	0					151	55	24.1217	2	71	3	0.7	2	1	2	6	33.3333	6.6	1.64	6.09	1.52	24.9589	3.95	64.8604	2.59868	0.62	1.072	103.49	1.8	13.04	4.46
598	0.3	1		1			158	65	26.0375	1	72	3	0.6	3	1	1	5	20	5.27	0.99	4.31	1.58	36.6589	2.36	54.7564	1.49367	0.37	0.893	67.54	1.43	17.61	5
599	0.05	0					160	60	23.4375	2	57	3	0.4	2	0				5.69	1.27	5.76	1.48	25.6944	3.7	64.2361	2.5	0.58	0.126	115.58	1.41	12.99	4.11
600	0.1	1		1			160	54	21.0938	2	45	2	0.9	2	1	4	25	16	4.74	1.34	4.1	1.15	28.0488	2.46	60	2.13913	0.49	0.388	96.78	1.59	12.98	3.92
601	3	0					155	55	22.8928	2	40	2	0.3	3	1	3	7	42.8571	4.76	0.35	3.21	1.3	40.4984	1.73	53.8941	1.33077	0.18	1.385	100.38	1.76	11.64	4.27
602	0.1	0					160	65	25.3906	2	49	2	0.9	3	0				4.47	0.52	3.46	1.42	41.0405	1.9	54.9133	1.33803	0.14	2.13	82.98	1.46	13.13	4.12
603	N	0					170	75	25.9516	1	25	1	0.2	1	0				4.92	3.16	5	1.01	20.2	3.44	68.8	3.40594	0.55
604	N	0					162	51	19.433	2	27	1	0.6	3	1	2	10	20	5.03	1.56	4.76	0.93	19.5378	3.42	71.8487	3.67742	0.41	1.606	102.13	1.62	12.78	4.81
605	N	0					178	86.5	27.3008	1	31	1	0.5	2	1	3	6	50	5.05	1.13	3.04	1.04	34.2105	1.7	55.9211	1.63462	0.3	1.065	84.92	1.49	10.85	4.8
606	0.05	0					165	55	20.202	2	39	2	2.3	2	1	17	46	36.9565	4.81	1.11	3.93	0.99	25.1908	2.64	67.1756	2.66667	0.3	1.993	87.53	1.48	11.86	4.46
607	0.05	0					165	65	23.8751	1	55	2	0.7	3	0				5.1	1.12	4.97	1.19	23.9437	3.4	68.4105	2.85714	0.38	1.335	101.87	1.72	11.52	4.28
608	5	0					170	65	22.4913	1	29	1	3	2	1	3	5	60	4.89	1.61	3.62	0.71	19.6133	2.51	69.337	3.53521	0.4	0.775	91.78	1.53	13.77	4.74
609	2	0					160	57	22.2656	2	51	2	0.2	1	1	3	16	18.75	4.82	0.89	5.06	1.31	25.8893	3.35	66.2055	2.55725	0.4	2.213	100.07	1.34	12.93	4.7
610	0.1	0					162	50	19.052	2	39	2	1.4	1	1	1	11	9.09091	4.8	0.96	4.15	1.36	32.7711	2.6	62.6506	1.91176	0.19	2.34	113.74	1.28	11.96	5.53
611	N	0					164	55	20.4491	2	48	2	0.5	1	1	3	3	100	5.48	0.74	6.1	1.98	32.459	3.81	62.459	1.92424	0.31	0.823	96.93	1.24	13.76	4.9
612	0.1	0					170	79	27.3356	1	60	3	0.5	1	0				5.7	1.19	5.18	1.72	33.2046	3.1	59.8456	1.80233	0.36	0.23	99.95	1.33	12.86	4.9
613	1	0					154	55	23.1911	2	60	3	0.8	1	0				6.62	1.18	5.56	1.2	21.5827	3.68	66.1871	3.06667	0.68	3.298	102.25	1.64	13.65	4.12
614	3	0					174	70	23.1206	1	28	1	1	1	0				5.52	0.93	5.1	1.49	29.2157	3.06	60	2.05369	0.55	0.889	99.47	1.33	12.77	4.27
615	0.06	1			1		160	71	27.7344	2	57	3	1.1	1	0				5.63	1.63	4.79	1.16	24.2171	2.85	59.499	2.4569	0.78	1.281	90.74	1.51	14.14	4.15
616	0.1	0					170	68	23.5294	1	29	1	1.5	3	1	3	7	42.8571	4.55	0.76	4.1	1.35	32.9268	2.31	56.3415	1.71111	0.44	2.378	87.33	1.47	13.44	4.94
617	0.1	1		1			159	70	27.6888	2	41	2	0.7	3	1	3	42	7.14286	4.71	0.76	3.94	1.27	32.2335	2.18	55.3299	1.71654	0.49	1.544	97.92	1.67	12.4	4.39
618	0.04	0					172	84	28.3937	2	45	2	1.2	2	1	1	4	25	5.66	6.85	5.79	0.93	16.0622	2.05	35.4059	2.2043	2.81	1.439	139.97	1.31	12.36	5.15
619	0.5	0					169	77.5	27.1349	1	42	2	0.5	3	0				5.54	0.91	4.6	1.21	26.3043	2.8	60.8696	2.31405	0.59	1.726	81.63	1.54	12.39	5.06
620	0.02	0					148	52.5	23.9682	2	51	2	0.7	3	1	2	5	40	5.42	1.67	5.28	1.37	25.947	3.09	58.5227	2.25547	0.82	0.832	77.38	1.39	15.47	4
621	4	1		1			163	67.5	25.4055	2	47	2	1	1	0				5.42	1.67	3.8	1.26	33.1579	2.11	55.5263	1.6746	0.43	2.094	101.41	1.58	11.47	4.84
622	2	0					165	60	22.0386	2	30	1	0.4	1	1	2	7	28.5714	4.72	0.77	3.58	1.22	34.0782	2.11	58.9385	1.72951	0.25	1.397	80.49	1.01	12.8	4.72
623	4	0					162	47	17.9089	2	37	2	1.5	2	0				4.32	1.43	3.72	1.12	30.1075	2.03	54.5699	1.8125	0.57	2.483	111.64	1.55	11.34	4.47
624	0.7	0					168	80	28.3447	2	60	3	1	1	1	1	1	100	4.99	2.5	6.28	1.45	23.0892	3.87	61.6242	2.66897	0.96	2.029	113.84	1.59	13.98	4.54
625	N	0					166	65	23.5883	1	73	3	1	3	1	3	4	75	5.56	1.28	4.88	1.22	25	3.09	63.3197	2.53279	0.57	1.845	120.74	1.48	12.35	3.98
626	0.04	0					170	78	26.9896	2	54	2	0.8	1	1	4	4	100	5.25	1.58	4.9	1.11	22.6531	3.16	64.4898	2.84685	0.63	1.953	87.94	1.34	14.08	4.38
627	1	0					160	52	20.3125	2	30	1	1	1	0				5.61	0.49	3.26	1.17	35.8896	1.87	57.362	1.59829	0.22	1.371	96.73	1.41	11.61	4.87
628	1	0					153	50	21.3593	2	59	3	0.6	2	0				6.67	4.59	4.28	1.13	26.4019	1.95	45.5607	1.72566	1.2	2.842	82.9	1.44	13.82	4.82
629	0.02	0					164	75	27.8852	2	73	3	1.5	2	1	2	2	100	6.09	1.71	5.09	1.14	22.3969	3.29	64.6365	2.88596	0.66	0.505	92.26	1.63	13.49	3.11
630	N	0					152	48.5	20.992	2	19	1	0.2	1	0				4.58	1.01	4.58	1.24	27.0742	2.83	61.7904	2.28226	0.51	0.518	68.15	1.63	12.05	4.57
631	2	0					162	58	22.1003	2	70	3	0.4	1	0				5.06	1.28	5.95	2.22	37.3109	3.04	51.0924	1.36937	0.69	0.987	105.7	1.74	11.99	4.59
632	0.2	0					158	54	21.6311	1	33	1	0.7	1	0				5.8	2.33	3.41	1.3	38.1232	1.54	45.1613	1.18462	0.57	2.585	91.7	1.4	11.97	4.95
633	0.1	0					168	50	17.7154	1	23	1	0.7	3	1	1	5	20	5.03	1.5	4.91	1.99	40.5295	2.52	51.3238	1.26633	0.4	1.057	97	1.69	14.3	4.16
634	0.2	0					163	55	20.7008	2	24	1	0.7	1	1	3	10	30	4.77	0.59	3.73	1.44	38.6059	2	53.6193	1.38889	0.29	1.378	85.17	1.31	14.03	3.65
635	0.1	0					170	80	27.6817	2	41	2	0.6	1	0				5.43	1.29	5.31	1.21	22.7872	3.54	66.6667	2.92562	0.56	0.666	88.59	1.6	15.19	4.33
636	0.1	0					157	54	21.9076	2	39	2	0.6	1	0				4.61	0.43	4.06	1.36	33.4975	2.54	62.5616	1.86765	0.16	1.365	108.08	2.02	13.34	4.34
637	N	0					153	53	22.6409	2	59	3	0.8	3	0				4.47	1.19	4.62	1.47	31.8182	2.65	57.3593	1.80272	0.5	3.727	96.77	1.67	13.09	4.81
638	1	0					155	54	22.4766	2	69	3	0.2	1	0				5.3	1.75	5.81	1.67	28.7435	3.54	60.9294	2.11976	0.6	2.59	108.99	1.56	13.81	3.5
639	0.3	0					160	66	25.7812	2	29	1	1.2	3	0				5.16	1.65	3.34	0.96	28.7425	1.82	54.491	1.89583	0.56	0.877	97.34	1.38	13.38	4.05
640	N	0					156	60	24.6548	1	51	2	1.3	1	0				5.35	0.54	3.9	1.58	40.5128	2.18	55.8974	1.37975	0.14	0.661	85.9	1.55	13.12	4.21
641	N	0					167	58	20.7967	2	51	2	1.5	3	1	5	5	100	5.48	0.52	3.09	1.25	40.4531	1.62	52.4272	1.296	0.22	0.629	104.11	1.39	12.86	4.16
642	0.02	0					160	53	20.7031	2	51	2	1.4	1	1	6	11	54.5455	5.06	0.41	3.87	1.65	42.6357	2.17	56.0724	1.31515	0.05	0.564	96.38	1.44	12.59	5.12
643	0.04	0					165	86	31.5886	2	47	2	0.8	2	1	7	11	63.6364	4.68	0.84	3.91	0.94	24.0409	2.64	67.5192	2.80851	0.33	1.241	108.05	1.61	13.93	4.23
644	N	0					160	76	29.6875	2	65	3	0.3	1	0				5.32	1.01	4.41	1.31	29.7052	2.67	60.5442	2.03817	0.43	1.089	88.36	1.46	11.94	4.69
645	1	0					171	75	25.6489	1	30	1	0.2	1	1	1	2	50	4.63	0.7	4.1	1.16	28.2927	2.69	65.6098	2.31897	0.25	1.511	93.21	1.42	15.55	4.79
646	N	0					167	80	28.6851	2	63	3	1.3	2	1	2	4	50	5.54	2.07	4.5	1.12	24.8889	2.86	63.5556	2.55357	0.52	1.115	90.97	1.21	12.5	4.77
647	2	1			1		156	59	24.2439	1	37	2	1.1	1	0				4.09	0.5	3.61	1.61	44.5983	1.76	48.7535	1.09317	0.24	1.143	85.59	1.58	12.28	4.82
648	N	0					176	77	24.858	1	54	2	0.8	1	1	1	4	25	4.79	1.21	4.47	1.51	33.7808	2.41	53.915	1.59603	0.55	1.07	99.43	1.39	14.54	4.18
649	5	0					159	47	18.591	2	56	3	1.1	1	0				5.35	2.09	6.44	1.39	21.5839	4.13	64.1304	2.97122	0.92	1.125	107.01	1.11	13.82	5.18
650	0.1	0					153	72	30.7574	2	36	2	2	1	0				4.51	1.85	5.18	1.32	25.4826	3.06	59.0734	2.31818	0.8	0.577	88.61	1.45	11.49	5.08
651	0.3	0					162	84	32.0073	2	25	1	1	3	1	1	6	16.6667	4.52	1.41	5.6	1.23	21.9643	3.69	65.8929	3	0.68	0.812	79.89	1.47	11.17	4.99
652	0.1	0					160	55	21.4844	2	63	3	0.3	2	0				5.31	1.5	3.77	1.44	38.1963	1.65	43.7666	1.14583	0.68	1.465	90.55	1.02	12.51	5.12
653	0.1	0					160	64	25	2	68	3	0.4	1	0				4.38	0.74	4.33	1.18	27.2517	2.74	63.2794	2.32203	0.41	0.597	101.45	1.54	14.2	4.55
654	0.5	0					167	65	23.3067	1	46	2	1	1	0				4.63	3.39	5.77	0.93	16.1179	3.56	61.6984	3.82796	1.28	1.116	104.21	1.41	14.48	3.97
655	0.2	1		1			160	75	29.2969	2	52	2	0.9	3	0				5.12	1.6	4.7	1.28	27.234	3.03	64.4681	2.36719	0.39	2.708	84.96	1.32	11.99	4.43
656	0.5	0					176	66	21.3068	2	66	3	0.8	2	1	1	13	7.69231	4.93	1.26	5.61	1.24	22.1034	3.86	68.8057	3.1129	0.51	0.712	89.32	1.02	12.53	4.93
657	0.04	0					165	62	22.7732	2	63	3	0.6	1	1	1	3	33.3333	4.81	1.06	4.52	1.31	28.9823	2.9	64.1593	2.21374	0.31	0.786	92.2	1.35	13.22	4.68
658	0.1	0					159	63	24.9199	2	28	1	1.4	2	0				5.35	1.32	5.1	1.14	22.3529	3.3	64.7059	2.89474	0.66	2.402	102.65	1.18	12.07	4.49
659	1	0					167	74	26.5338	1	41	2	1.1	1	1	4	5	80	4.88	1.99	4.57	1.21	26.477	2.65	57.9869	2.19008	0.71	0.794	99.54	1.3	12.22	3.69
660	0.2	0					179	87	27.1527	1	27	1	0.7	1	1	4	6	66.6667	5.09	2.09	3.42	0.71	20.7602	1.93	56.4327	2.71831	0.78	0.636	75.81	1.62	13.19	4.45
661	N	0					166	63	22.8625	2	53	2	0.6	2	1	2	7	28.5714	5.4	3.3	4.36	0.94	21.5596	2.21	50.6881	2.35106	1.21	10.954	114.27	1.46	13.31	4.88
662	0.3	0					178	72	22.7244	1	27	1	0.7	1	1	2	2	100	4.44	1.29	4.24	1.24	29.2453	2.4	56.6038	1.93548	0.6	1.505	112.38	1.32	11.22	3.18
663	N	0					158	50	20.0288	2	41	2	0.8	3	1	3	8	37.5	4.26	0.98	4.45	1.99	44.7191	2.06	46.2921	1.03518	0.4	2.892	84.74	1.72	14.07	3.65
664	0.4	0					156	50	20.5457	2	53	2	0.7	2	0				5.79	1.14	3.45	1.26	36.5217	1.75	50.7246	1.38889	0.44	1.13	67.18	1.6	11.55	4.28
665	N	0					162	60	22.8624	2	38	2	0.8	1	1	5	5	100	4.74	0.39	4	1.38	34.5	2.31	57.75	1.67391	0.31	0.978	133.54	1.65	11.46	4.12
666	0.04	0					155	65	27.0552	1	67	3	0.7	1	1	3	6	50	4.94	1.23	5.12	1.37	26.7578	3.24	63.2812	2.36496	0.51	1.667	121.76	1.55	15.84	4.28
667	N	0					168	60	21.2585	2	26	1	0.7	3	0				4.37	0.73	4.19	1.9	45.3461	2.05	48.926	1.07895	0.24	1.749	85.33	1.61	12.28	4.69
668	0.1	0					160	48	18.75	2	44	2	0.9	1	1	4	10	40	4.22	0.69	3.73	1.49	39.9464	1.9	50.9383	1.27517	0.34	1.048	107.19	1.36	13.39	4.54
669	0.9	0					165	66	24.2424	2	44	2	1	3	0				5.38	0.91	3.79	1.28	33.7731	1.94	51.1873	1.51562	0.57	2.454	104.54	1.47	11.04	4.26
670	0.3	0					152	44	19.0443	2	50	2	0.6	1	0				5.1	1.22	4.18	1.61	38.5167	1.98	47.3684	1.22981	0.59	2.361	100.41	1.16	12.58	4.5
671	1	0					163	51	19.1953	2	46	2	0.6	1	0				5.15	0.99	4.48	1.77	39.5089	2.37	52.9018	1.33898	0.34	1.676	98.58	1.59	14.29	4.49
672	0.5	0					167	65	23.3067	1	39	2	1	1	0				4.79	0.84	5.05	1.78	35.2475	2.72	53.8614	1.52809	0.55	0.484	134.64	1.43	14.2	4.6
673	0.1	0					158	56	22.4323	2	45	2	0.4	2	0				5.12	1.42	3.49	1.24	35.5301	1.62	46.4183	1.30645	0.63	0.841	107.93	1.2	12.97	4.31
674	0.5	0					158	50	20.0288	2	39	2	0.4	1	0				4.92	0.77	4.38	2.07	47.2603	2.09	47.7169	1.00966	0.22	2.66	78.88	1.33	11.17	3.5
675	N	0					167.5	63.5	22.6331	2	43	2	1	2	1	1	7	14.2857	4.35	0.46	4.37	1.4	32.0366	2.67	61.0984	1.90714	0.3	0.787	90.19	1.54	14.94	4.85
676	1	0					165	64	23.5078	2	37	2	2	2	1	5	14	35.7143	4.83	0.94	3.96	0.79	19.9495	2.63	66.4141	3.32911	0.54	5.356	95.36	1.45	14.68	4.46
677	0.1	0					165	61	22.4059	2	58	3	0.6	1	0				5.23	1.33	4.41	1.23	27.8912	2.71	61.4512	2.20325	0.47	0.909	103.9	1.59	12.57	4.22
678	0.1	0					171	63	21.5451	1	28	1	0.5	1	1	9	9	100	5.42	1.18	4.18	1.15	27.512	2.55	61.0048	2.21739	0.48	1.138	99.24	1.43	12.91	4.51
679	0.1	0					160	75	29.2969	1	28	1	1.2	1	0				4.73	1.13	3.37	0.84	24.9258	2.18	64.6884	2.59524	0.35	2.09	77	1.54	11.87	4.03
680	2	1		1			166	65	23.5883	2	32	1	1.2	1	1	1	2	50	4.95	1.54	4.24	0.73	17.217	2.9	68.3962	3.9726	0.61	1.757	132.76	1.75	10.33	4.09
681	0.1	0					157	44.5	18.0535	2	45	2	0.4	1	0				5.38	0.57	3.78	1.59	42.0635	1.93	51.0582	1.21384	0.26	0.831	69.27	1.63	13.97	3.24
682	0.01	0								2	43	2	0.3	1	0				5.39	2.11	4.14	1.44	34.7826	2.08	50.2415	1.44444	0.62	2.437	91.82	1.22	16.72	4.85
683	0.6	0					155	51	21.2279	2	52	2	0.5	1	0				5.33	1.02	3.84	1.24	32.2917	2.17	56.5104	1.75	0.43	1.767	137.2	1.41	13.18	4.45
684	0.1	0					158	63	25.2363	2	39	2	0.6	1	0				5.76	1.3	4.71	1.24	26.327	2.9	61.5711	2.33871	0.57
685	2	0					164	60	22.3081	2	58	3	1.1	1	1	4	7	57.1429	6.28	0.88	4.31	1.07	24.826	2.9	67.2854	2.71028	0.34	0.851	111.11	1.71	12.03	4.39
686	4	0					155	65	27.0552	1	44	2	1.8	1	1	7	37	18.9189	4.81	0.97	3.32	1.25	37.6506	1.7	51.2048	1.36	0.37	0.628	118.12	1.28	15.74	4.76
687	N	0					176	88	28.4091	2	46	2	0.6	1	0				5.46	1.81	4.34	1.16	26.7281	2.55	58.7558	2.19828	0.63	0.289	90.53	1.59	13.63	4.89
688	0.4	0					158	52	20.83	2	57	3	0.7	1	0				5.34	1.45	5.49	1.23	22.4044	3.6	65.5738	2.92683	0.66	1.283	100.53	1.26	14.08	4.8
689	0.1	0					181	80.5	24.5719	1	42	2	1	1	0				5.4	1.4	5	1.37	27.4	3.16	63.2	2.30657	0.47	1.078	94.86	1.56	15.7	4.44
690	9	0					163	49	18.4425	2	50	2	1	1	0				5.37	0.74	4.17	1.61	38.6091	2.37	56.8345	1.47205	0.19	0.907	119.95	1.22	13.16	3.45
691	0.2	0					153	65	27.7671	2	37	2	0.5	1	0				5.11	0.64	5.46	1.83	33.5165	3.41	62.4542	1.86339	0.22	0.727	106.3	1.33	12.6	3.91
692	N	0					156	42.5	17.4638	2	36	2	1.3	1	1	1	2	50	5.65	0.48	5.16	2.2	42.6357	2.9	56.2016	1.31818	0.06	2.251	88.02	1.67	15.23	4.14
693	N	0					162	58	22.1003	2	55	2	1	1	0				4.72	1.83	3.02	0.99	32.7815	1.58	52.3179	1.59596	0.45	0.604	109.19	1.3	11.58	3.87
694	0.3	0					170	76	26.2976	2	34	1	0.2	2	0				5.15	0.81	3.39	1.39	41.0029	1.83	53.9823	1.31655	0.17	1.522	117.26	1.34	12.09	4.01
695	0.2	0					167	70	25.0995	2	36	2	2.2	1	1	4	9	44.4444	4.14	3.57	3.65	0.86	23.5616	1.61	44.1096	1.87209	1.18	0.522	92.19	1.16	15.09	4.11
696	0.1	0					165	78	28.6501	1	47	2	2	3	1	1	3	33.3333	4.14	1.58	4.29	1.17	27.2727	2.56	59.6737	2.18803	0.56	1.962	93.73	1.55	12.26	4.57
697	0.4	1			1		164	65	24.1672	2	59	3	0.3	1	0				5.43	1.15	5.47	2.14	39.1225	2.92	53.3821	1.36449	0.41	0.291	94.02	1.78	11.78	5.17
698	0.04	0					158	59	23.634	1	54	2	0.4	3	0				4.82	1.61	4.34	0.88	20.2765	2.78	64.0553	3.15909	0.68	2.808	94.41	1.49	12.92	4.33
699	1	0					150	60	26.6667	2	25	1	0.5	2	0				5.2	1.06	4.2	0.97	23.0952	2.76	65.7143	2.84536	0.47	0.391	92.58	1.67	13.64	4.56
700	0.1	0					170	100	34.6021	1	47	2	0.7	3	0				4.9	1.15	3.61	1.1	30.4709	2.06	57.0637	1.87273	0.45	1.258	81.16	1.55	13.38	3.96
701	1	0					178	74	23.3556	1	40	2	0.2	1	0				5.08	3.71	5.16	0.87	16.8605	2.91	56.3953	3.34483	1.38	1.633	126.62	1.19	12.07	3.56
702	6	0					160	44.5	17.3828	2	51	2	3.6	2	0				5.12	0.54	4.39	2.2	50.1139	1.89	43.0524	0.859091	0.3	0.334	84.2	1.58	15.19	3.88
703	1	0					162	39	14.8605	1	38	2	0.3	1	0				4.99	0.96	4.78	1.47	30.7531	2.92	61.0879	1.98639	0.39	1.81	96.63	1.63	13.53	3.75
704	3	0					163	55	20.7008	1	43	2	6	2	1	12	29	41.3793	5.28	1.95	4.49	1.09	24.2762	2.66	59.2428	2.44037	0.74	1.311	88.31	1.59	12.08	3.79
705	0.2	1		1			164	67	24.9108	2	56	3	2	2	0				5.08	0.62	4.81	1.52	31.6008	2.95	61.3306	1.94079	0.34	1.157	92.58	1.36	12.78	3.65
706	3	0					164	56.5	21.0068	1	60	3	1.5	1	1	4	30	13.3333	5.77	1.22	4.97	1.41	28.3702	3.15	63.3803	2.23404	0.41	1.327	108.76	1.44	13.08	4.93
707	0.1	0					180	90	27.7778	1	35	2	0.6	1	0				4.76	1.31	4.56	1.15	25.2193	2.87	62.9386	2.49565	0.54	0.747	86.24	1.28	15.44	3.14
708	N	0					159	61	24.1288	2	31	1	0.7	3	0				4.84	2.22	3.95	1.09	27.5949	2.05	51.8987	1.88073	0.81	1.903	74.27	1.39	13.49	3.53
709	3	0					160	60	23.4375	2	61	3	0.2	2	0				5.37	1.74	4.58	1.2	26.2009	2.6	56.7686	2.16667	0.78	0.942	199.98	1.68	12	4
710	N	0					166	100	36.2897	2	31	1	0.9	2	1	2	11	18.1818	5.76	0.67	4.34	1.04	23.9631	2.84	65.4378	2.73077	0.46	1.041	102.73	1.11	14.42	3.39
711	N	0					170	85	29.4118	2	59	3	0.5	1	1	1	2	50	4.54	2.51	4.17	0.76	18.2254	2.53	60.6715	3.32895	0.88	1.649	112.11	1.45	12.14	4.44
712	N	0					171	69	23.597	2	46	2	0.7	1	1	1	4	25	4.75	2.44	3.69	0.82	22.2222	2.07	56.0976	2.52439	0.8	2.066	123.28	1.92	12.78	4.53
713	0.5	0					156	63.5	26.093	2	64	3	0.9	1	0				4.77	0.97	4.57	1.16	25.3829	2.81	61.488	2.42241	0.6	1.758	117.14	1.6	12.43	4.82
714	N	0					169	60	21.0077	1	37	2	1	1	0				5.61	2.07	4.48	1.09	24.3304	2.61	58.2589	2.3945	0.78	1.136	94.28	1.66	16.76	4.46
715	N	0					166	65	23.5883	2	43	2	0.3	1	0				5.36	5.83	5.02	0.81	16.1355	2.26	45.0199	2.79012	1.95	0.863	83.47	1.79	11.5	4.33
716	0.1	0					163	52	19.5717	2	38	2	0.4	1	0				5.63	0.75	3.73	1.41	37.8016	2.05	54.9598	1.4539	0.27	0.583	75.72	1.72	14.71	4.58
717	N	0					180	85	26.2346	2	58	3	1.2	2	0				4.78	1.78	3.43	0.91	26.5306	1.77	51.6035	1.94505	0.75	1.872	133.62	1.96	12.41	5.09
718	1	0					178	61	19.2526	1	29	1	1	1	1	5	9	55.5556	5.22	0.79	3.62	1.35	37.2928	1.86	51.3812	1.37778	0.41	0.638	83.63	1.27	14.31	3.99
719	1	0					155	67	27.8876	1	55	2	0.6	3	1	2	14	14.2857	6.56	0.89	3.29	1.1	33.4347	1.88	57.1429	1.70909	0.31	0.442	106.65	1.85	12.77	5.7
720	0.1	0					172	69	23.3234	1	66	3	0.8	2	1	21	26	80.7692	5.28	3.78	4.48	0.9	20.0893	2.06	45.9821	2.28889	1.52	0.62	131.44	1.75	12.78	4.75
721	0.1	0					160	64	25	2	46	2	2.5	2	1	5	6	83.3333	5.79	2.62	4.96	1.05	21.1694	2.96	59.6774	2.81905	0.95	0.771	101.44	1.46	13.43	3.94
722	N	0					159	61	24.1288	2	49	2	0.6	1	1	3	4	75	4.71	1.17	4.38	1.14	26.0274	2.72	62.1005	2.38596	0.52	1.413	99.2	1.48	11.78	4.33
723	2	0					180	72	22.2222	1	35	2	1	3	1	2	4	50	4.67	1.01	2.87	1	34.8432	1.45	50.5226	1.45	0.42	1.158	75.73	1.36	11.49	4.46
724	0.1	0					165	72	26.4463	2	49	2	3	2	1	7	22	31.8182	5.73	2.19	6.34	1.24	19.5584	3.9	61.5142	3.14516	1.2	2.512	92.54	1.73	12.46	4.11
725	1	0					168	66	23.3844	1	58	3	0.4	2	1	3	4	75	5.88	3.41	5.64	1	17.7305	3.11	55.1418	3.11	1.53	2.855	87.54	1.2	14.11	4.48
726	0.1	0					159	75	29.6665	2	78	3	0.5	1	0				5.68	0.69	4.94	0.78	15.7895	3.03	61.336	3.88462	1.13	1.142	105.85	1.58	12.48	4.07
727	2.5	0					165	65	23.8751	2	39	2	0.8	1	0				4.84	0.93	3.84	1.1	28.6458	0.48	12.5	0.436364	2.26	2.353	90.17	1.57	14.17	4.18
728	20	0					162	65	24.7676	1	49	2	0.5	3	0				5.16	2.58	3.82	0.87	22.7749	2.08	54.4503	2.3908	0.87	1.089	112.33	1.36	11.63	3.89
729	0.05	0					161	62	23.9188	2	51	2	1.5	1	1	12	23	52.1739	5.85	1.15	4.46	1.19	26.6816	2.71	60.7623	2.27731	0.56	1.422	106.82	1.3	14.24	4.02
730	10	0					165	65	23.8751	2	46	2	1.8	2	1	3	5	60	4.67	0.82	3.98	1.91	47.9899	1.84	46.2312	0.963351	0.23	1.21	110.33	1.17	14.1	4.3
731	0.1	0					171	76	25.9909	1	50	2	1	1	0				6.21	1.75	4.33	1.06	24.4804	2.56	59.1224	2.41509	0.71	0.498	101.77	1.48	16.4	4.28
732	1.5	0					172	75	25.3515	1	53	2	1	2	0				4.15	1	2.97	1.2	40.404	1.41	47.4747	1.175	0.36	0.987	81.16	1.43	12.99	4.13
733	0.06	0					163	52.5	19.7599	2	47	2	1.7	2	1	9	22	40.9091	5.7	1.17	3.64	1.36	37.3626	1.91	52.4725	1.40441	0.37	1.078	99.96	1.55	13.18	4.24
734	0.8	0					150	55	24.4444	1	34	1	1.1	3	0				4.34	2.38	4.23	0.94	22.2222	2.38	56.2648	2.53191	0.91	1.537	92.5	1.25	10.88	4.6
735	0.03	0					160	45	17.5781	1	32	1	1.2	2	1	18	28	64.2857	4.49	0.71	4.54	1.5	33.0396	2.63	57.9295	1.75333	0.41	2.164	93.66	1.25	14.13	3.31
736	0.5	0					164	56	20.8209	2	49	2	0.3	1	0				5.43	0.75	3.33	1.15	34.5345	1.76	52.8529	1.53043	0.42	1.712	92.91	1.33	13.43	4.01
737	N	0					175	75	24.4898	1	30	1	0.3	2	0				5.28	1.71	5.72	1.14	19.9301	3.73	65.2098	3.27193	0.85	1.397	85.7	1.4	12.57	4.14
738	0.1	1				1	170	83	28.7197	2	52	2	2	2	1	7	36	19.4444	5.85	0.98	4.11	1.22	29.6837	2.36	57.4209	1.93443	0.53	1.219	107.43	1.16	12.84	4.44
739	0.2	0					160	65	25.3906	2	46	2	2	2	1	4	12	33.3333	5.23	0.28	3.84	1.78	46.3542	1.95	50.7812	1.09551	0.11	0.637	111.96	1.37	13.16	3.91
740	0.1	0					160	48	18.75	2	39	2	2	2	1	4	4	100	5.2	0.32	3.7	1.62	43.7838	2.03	54.8649	1.25309	0.05	1.062	101.83	1.41	12.98	4.18
741	0.3	0					155	49	20.3954	1	36	2	0.2	1	0				4.65	1.25	4.12	0.99	24.0291	2.71	65.7767	2.73737	0.42	1.318	95.95	1.4	12.67	3.77
742	0.3	0					163	59	22.2063	2	51	2	0.5	1	0				4.82	1.53	3.37	0.98	29.0801	2.09	62.0178	2.13265	0.3	0.993	104.24	1.38	14.23	4.42
743	0.1	0					165	55	20.202	2	33	1	0.7	0	1	1	22	4.54545	5.15	1.2	4.15	1.38	33.253	2.15	51.8072	1.55797	0.62	2.715	100.42	1.53	12.15	4.51
744	0.5	1	1				159	65	25.711	2	72	3	1.1	2	1	2	5	40	5	0.97	4.67	1.07	22.9122	3.07	65.7388	2.86916	0.53	1.293	97.49	1.61	13.75	3.97
745	1	0					176	72	23.2438	1	49	2	1	1	0				5.16	1.16	4.96	1.21	24.3952	3.14	63.3065	2.59504	0.61	0.758	143.11	1.38	11.99	4.15
746	N	0					162	54	20.5761	1	56	3	0.8	1	0				5.02	0.66	3.92	1.4	35.7143	2.28	58.1633	1.62857	0.24	1.475	120.28	1.68	12	4.41
747	1	0					155	56	23.3091	2	55	2	0.7	1	0				5.12	0.96	5.45	1.62	29.7248	3.31	60.7339	2.04321	0.52	2.664	100.3	1.11	13.84	3.28
748	1	0					166	65	23.5883	2	61	3	1	1	0				5.15	1.87	5.78	1.57	27.1626	3.54	61.2457	2.25478	0.67	2.098	114.48	1.59	15.18	4.04
749	1.5	0					157	51	20.6905	2	56	3	3	2	0				5.02	0.97	4.5	2.05	45.5556	2.13	47.3333	1.03902	0.32	1.903	95.16	1.32	13.14	3.63
750	4	0					173.5	83	27.5727	2	30	1	1.1	1	1	2	12	16.6667	5.36	1.92	3.91	0.87	22.2506	2.45	62.6598	2.81609	0.59	1.215	122.38	1.55	13.27	4.47
751	3	0					158	46	18.4265	2	64	3	0.5	2	0				5.27	1.01	3.49	1.12	32.0917	1.88	53.8682	1.67857	0.49	1.73	115.86	1.4	14.11	4
752	10	1			1		156	53.5	21.9839	2	63	3	3	2	1	2	5	40	6.19	1.03	5.45	1.96	35.9633	3.04	55.7798	1.55102	0.45	0.241	129.67	1.5	13.14	4.54
753	0.1	0					153	54	23.0681	2	52	2	0.6	1	0				5.32	1.11	5.79	1.31	22.6252	3.79	65.4577	2.89313	0.69	0.377	120.19	1.16	13.77	3.98
754	0.5	1		1			168	55	19.487	2	48	2	0.6	2	1	1	5	20	5	0.82	5.28	1.82	34.4697	3.19	60.4167	1.75275	0.27	0.877	94.13	1.52	12.42	4.41
755	0.1	0					158	51.5	20.6297	2	29	1	1	1	0				4.48	0.84	4.07	1.56	38.3292	2.21	54.2998	1.41667	0.3	2.118	77.58	1.61	10.73	4.45
756	0.7	0					166	66	23.9512	2	59	3	0.5	2	0				4.92	1.2	3.9	0.93	23.8462	2.64	67.6923	2.83871	0.33	1.256	103.15	1.54	12.94	3.92
757	0.05	0					181	81	24.7245	1	31	1	2	1	1	15	35	42.8571	4.66	1.32	4.49	1.01	22.4944	3	66.8151	2.9703	0.48	1.14	139.69	1.36	15.36	4.74
758	0.8	0					162	53	20.1951	2	46	2	0.4	1	0				5.13	0.98	3.87	1.27	32.8165	2.33	60.2067	1.83465	0.27	1.722	96.68	1.68	11.45	4.78
759	0.2	0					158	55	22.0317	2	55	2	0.3	1	0				4.74	0.66	4.54	2.27	50	2.12	46.696	0.933921	0.15	1.27	89.42	1.43	11.89	3.78
760	0.1	0					150	46	20.4444	2	52	2	1.6	1	0				4.74	0.63	4.3	2.08	48.3721	2.08	48.3721	1	0.14	0.6	100.69	1.63	12.26	4.08
761	2	0					157	48	19.4734	2	46	2	0.3	2	0				4.93	1.61	3.97	0.78	19.6474	2.5	62.9723	3.20513	0.69	1.331	108.59	1.62	12.57	4.05
762	0.1	0					156	52	21.3675	2	54	2	0.5	1	0				4.42	2.01	5.6	1.18	21.0714	3.61	64.4643	3.05932	0.81	3.31	90.65	1.53	12.5	4.51
763	0.1	0					177	83	26.493	1	42	2	0.4	1	1	2	4	50	5.25	2.29	4.62	1.23	26.6234	2.52	54.5455	2.04878	0.87	1.276	131.96	1.33	14.24	4.19
764	0.1	0					159	62	24.5243	2	45	2	0.7	3	0				6.09	1.52	4.33	1.35	31.1778	2.6	60.0462	1.92593	0.38	3.073	126.01	1.62	12.98	4.57
765	0.1	0					156	44.5	18.2857	2	40	2	0.3	3	0				4.75	0.76	4.09	1.6	39.1198	2.14	52.3227	1.3375	0.35	0.643	90.52	1.28	12.7	4.6
766	0.5	0					174	80	26.4236	1	45	2	0.4	1	1	1	14	7.14286	4.93	1.79	4.54	1.17	25.7709	2.79	61.4537	2.38462	0.58	0.312	106.65	1.58	11.11	4.82
767	0.2	0					157	61.5	24.9503	2	49	2	0.6	2	0				4.51	0.61	3.23	1.33	41.1765	1.78	55.1084	1.33835	0.12	1.241	83.05	1.13	14.1	3.44
768	0.5	0					163	60	22.5827	2	25	1	0.2	1	1	2	8	25	4.6	1.02	5.22	1.84	35.249	3.08	59.0038	1.67391	0.3	1.163	88.05	1.28	13.24	3.7
769	N	0					160	60	23.4375	2	38	2	0.7	3	0				4.33	1.96	4.26	0.89	20.892	2.67	62.6761	3	0.7	2.135	116.06	1.54	11.86	3.87
770	10	0					159	67.5	26.6999	2	58	3	0.8	1	0				5.4	0.5	4.09	1.28	31.2958	2.58	63.0807	2.01562	0.23	0.986	66.3	2	14.24	4.8
771	2	0					166	58	21.048	2	33	1	0.8	2	0				4.09	0.54	3.36	1.15	34.2262	1.89	56.25	1.64348	0.32	2.332	99.39	1.29	13.38	3.94
772	0.2	0					165	51	18.7328	2	50	2	0.6	1	0				5.39	1.31	4.47	1.13	25.2796	2.78	62.1924	2.46018	0.56	1	93.42	1.19	11.06	4.54
773	0.1	0					160	62.5	24.4141	2	54	2	0.4	1	0				6.39	3.51	6.32	1.27	20.0949	3.79	59.9684	2.98425	1.26	1.186	108.44	1.77	11.29	3.64
774	0.1	0					158	55	22.0317	2	31	1	2	2	1	8	38	21.0526	4.84	1.36	4.81	1.42	29.5218	2.85	59.2516	2.00704	0.54	0.524	91.32	1.63	13.35	3.65
775	0.5	0					156	51	20.9566	2	47	2	0.5	1	0				5.05	0.73	4.65	2.31	49.6774	2.04	43.871	0.883117	0.3	1.991	118.99	1.31	12.98	4.55
776	3	1		1			165	58	21.3039	2	69	3	0.3	1	0				5.68	1.08	4.02	1.09	27.1144	2.44	60.6965	2.23853	0.49	0.403	113.31	1.31	12.66	4.15
777	0.1	0					163	70	26.3465	2	50	2	0.3	3	0				5.49	2.19	2.5	0.75	30	1.06	42.4	1.41333	0.69	0.837	92.38	1.69	12.51	3.71
778	0.02	0					157	47.5	19.2706	2	36	2	1.7	2	1	4	14	28.5714	4.94	0.56	3.56	1.22	34.2697	2.23	62.6404	1.82787	0.11	0.776	132.31	1.64	12.99	4.53
779	1	0					160	52	20.3125	2	57	3	0.3	2	0				4.84	1.4	6.2	0.88	14.1935	4.62	74.5161	5.25	0.7	1.989	115.75	1.37	11.51	4.38
780	0.1	0					178	72.5	22.8822	1	47	2	0.5	1	0				4.83	2.37	5.01	1.29	25.7485	2.93	58.483	2.27132	0.79	0.684	97.32	1.32	10.49	3.44
781	0.5	1		1			163	61.5	23.1473	2	53	2	1.1	1	0				5.97	1.25	4.79	1.33	27.7662	2.95	61.5866	2.21805	0.51	0.779	126.01	1.8	12.44	3.98
782	0.1	0					165	62	22.7732	2	30	1	1	1	1	12	78	15.3846	5.75	1.03	4.66	1.45	31.1159	2.85	61.1588	1.96552	0.36	1.441	139.81	1.17	15.69	4.9
783	0.2	0					163	61.5	23.1473	2	60	3	0.4	1	0				5.8	1.04	4.48	1.58	35.2679	2.51	56.0268	1.58861	0.39	1.127	93.6	1.65	14.31	4.46
784	N	0					156	82	33.6949	2	57	3	0.3	1	0				5.51	1.55	5.34	1.18	22.0974	3.52	65.9176	2.98305	0.64	4.472	98.28	1.76	12.08	4.48
785	0.5	0					156	50.5	20.7512	2	36	2	0.5	2	0				4.66	0.84	3.42	1.59	46.4912	1.72	50.2924	1.08176	0.11	2.836	71.23	1.64	12.43	4.24
786	2	0					170	90	31.1419	2	33	1	0.2	1	0				4.98	2.34	5.26	1.15	21.8631	3.28	62.3574	2.85217	0.83	1.754	107.87	1.58	11.93	5.5
787	0.05	0					174	70	23.1206	1	31	1	0.5	2	1	25	52	48.0769	5.47	1.03	4.62	1.26	27.2727	2.97	64.2857	2.35714	0.39	0.856	86.36	1.67	13.42	4.57
788	0.1	1	1				155	60	24.974	2	36	2	2.4	1	1	28	47	59.5745	5.1	0.92	3.86	1.33	34.456	2.12	54.9223	1.59398	0.41	3.021	107.98	1.78	13.12	4.97
789	3	0					180	80	24.6914	1	41	2	0.6	1	0				5.28	0.92	3.94	1.11	28.1726	2.32	58.8832	2.09009	0.51	1.106	88.65	1.49	12.6	4.48
790	0.1	0					171	75	25.6489	1	26	1	0.7	1	1	3	3	100	5.1	0.8	3.61	1.16	32.133	2.03	56.2327	1.75	0.42	2.002	131.92	1.29	12.1	4.11
791	0.04	0					182	87	26.2649	1	26	1	0.6	1	1	1	2	50	5.05	2.5	3.81	0.88	23.0971	2.05	53.8058	2.32955	0.88	1.142	101.61	1.45	14.08	4.04
792	0.1	0					171.5	85	28.8995	1	32	1	0.3	1	0				5.6	0.86	4.41	1.4	31.746	2.6	58.9569	1.85714	0.41	1.232	104.94	1.52	14.55	3.89
793	0.05	0					170	68	23.5294	1	58	3	1.8	1	1	1	5	20	4.7	1.57	6.2	1.89	30.4839	3.99	64.3548	2.11111	0.32	0.637	102.99	1.2	13.66	3.97
794	0.5	0					160	56	21.875	2	39	2	0.8	2	0				5.12	0.68	5.09	2.13	41.8468	2.89	56.778	1.35681	0.07	1.658	111.11	1.24	13.87	3.41
795	0.3	1		1			163	71	26.7229	2	66	3	0.2	1	0				5.05	2.19	4.66	1	21.4592	3.02	64.8069	3.02	0.64	1.657	83.47	1.55	12.56	4.17
796	2	0								1	29	1	2.2	1	0				4.41	1.03	3.83	1.22	31.8538	2.3	60.0522	1.88525	0.31	0.305	121.19	1.52	14.7	3.89
797	0.03	0					162	50	19.052	2	35	2	0.2	1	0				5.32	0.61	4.65	1.82	39.1398	2.6	55.914	1.42857	0.23	1.286	133.78	1.51	13.44	4.36
798	0.2	0					158	62.5	25.0361	2	42	2	0.5	1	0				4.71	0.55	4.21	1.33	31.5914	2.45	58.1948	1.84211	0.43	1.337	89.67	1.58	13.38	4.4
799	0.5	0					150	45	20	2	48	2	0.5	1	1	6	12	50	5.74	0.6	4.67	1.63	34.9036	2.69	57.6017	1.65031	0.35	0.97	80.37	1.85	12.41	4.25
800	0.3	1			1		152	46	19.91	2	30	1	1.6	2	1	1	6	16.6667	4.75	1.58	5.32	1.74	32.7068	3.01	56.5789	1.72989	0.57	3.414	123.43	1.61	12	4.43
801	0.2	1				1	157	55	22.3133	2	43	2	0.7	2	1	1	6	16.6667	5.28	0.65	3.92	1.5	38.2653	2.14	54.5918	1.42667	0.28	1.603	104.49	1.46	12.44	3.6
802	0.1	0					160	67.5	26.3672	2	57	3	0.3	2	0				5.85	0.78	3.94	1.25	31.7259	2.18	55.3299	1.744	0.51	2.552	59.39	1.48	11.26	4.56
803	0.02	0					165	60	22.0386	2	31	1	0.5	1	0				5.47	0.92	3.8	1.43	37.6316	2.16	56.8421	1.51049	0.21	1.217	85.7	1.38	13.05	3.75
804	0.1	0					158	62	24.8358	2	37	2	0.5	1	1	1	11	9.09091	5.15	2.01	4.14	1.09	26.3285	2.34	56.5217	2.14679	0.71	1.572	101.36	1.4	10.82	3.61
805	1	0					158	55	22.0317	2	57	3	0.4	2	0				5.6	0.67	5.27	2.55	48.3871	2.19	41.556	0.858824	0.53	2.849	121.14	1.65	13.57	4.05
806	1	0					153	48.5	20.7185	2	45	2	0.8	2	1	1	2	50	5.02	0.66	4.82	1.83	37.9668	2.79	57.8838	1.52459	0.2	2.244	91.52	1.59	14.62	4.33
807	6	0					168	65	23.03	2	53	2	1.1	1	0				5.33	0.63	4.37	1.63	37.2998	2.52	57.6659	1.54601	0.22	0.794	94.32	1.68	13.19	4.26
808	4	0					156	57	23.4221	2	37	2	1.5	1	0				4.8	2.18	5.02	1.01	20.1195	3.21	63.9442	3.17822	0.8	1.458	102.31	2.04	13.31	4.27
809	5	0					157	57	23.1247	2	34	1	0.4	1	1	1	14	7.14286	4.86	3.06	5.26	0.96	18.251	3.33	63.308	3.46875	0.97	2.009	123.59	1.68	11.42	4.47
810	N	0					160	63	24.6094	2	62	3	1.2	1	1	1	3	33.3333	5.59	3.28	4.98	1.12	22.49	2.61	52.4096	2.33036	1.25	1.496	106.18	1.66	11.01	3.99
811	5	0					169	65	22.7583	1	58	3	1	1	0				4.97	3.22	4.54	0.95	20.9251	2.57	56.6079	2.70526	1.02	1.917	93	1.89	13.38	4.28
812	5	0					160	58	22.6562	2	30	1	0.8	4	1	1	33	3.0303	5.36	1.52	3.61	1.06	29.3629	1.91	52.9086	1.80189	0.64	4.679	118.64	1.27	12.44	3.92
813	0.4	0					172	82	27.7177	1	37	2	0.5	1	1	2	3	66.6667	5.15	1.63	4.88	0.88	18.0328	3.1	63.5246	3.52273	0.9	2.685	90.15	1.76	14.2	4.43
814	1	0					160	63	24.6094	2	36	2	0.3	1	0				4.96	1.39	4.86	1.33	27.3663	2.98	61.3169	2.2406	0.55	1.927	84.77	1.24	11.52	4.54
815	0.2	0					158	55	22.0317	2	40	2	0.8	1	0				5	1.2	4.99	1.69	33.8677	2.84	56.9138	1.68047	0.46	2.235	112.94	1.7	11.48	3.38
816	0.3	0					170	75	25.9516	1	40	2	0.8	1	1	12	12	100	5.13	1.47	4.36	0.95	21.789	2.92	66.9725	3.07368	0.49	1.769	91.27	1.19	12.8	4.13
817	0.1	0					155	50	20.8117	2	45	2	0.2	1	0				5.28	0.83	4.59	1.14	24.8366	3.14	68.4096	2.75439	0.31	1.674	109.1	1.69	14.72	4.92
818	1	0					175	88	28.7347	1	32	1	0.6	1	0				4.98	2.5	5.08	1.05	20.6693	3.07	60.4331	2.92381	0.96	1.432	112.36	1.62	12.19	4.87
819	0.1	0					163	50	18.8189	2	32	1	0.5	1	0				4.72	0.71	3.55	1.1	30.9859	2.12	59.7183	1.92727	0.33	1.03	121.4	1.43	14.62	4.36
820	0.9	0					158	54	21.6311	2	46	2	0.3	1	0				5	1.16	3.45	1.4	40.5797	1.69	48.9855	1.20714	0.36	1.512	92.03	1.91	12.91	3.79
821	0.2	0					170	70	24.2215	1	51	2	0.7	1	0				6.25	3.57	5.1	0.89	17.451	2.92	57.2549	3.2809	1.29	0.996	103.27	1.36	11.43	4.73
822	0.3	0					170	74	25.6055	1	36	2	0.5	1	0				5.16	2.25	4.14	1.39	33.5749	1.67	40.3382	1.20144	1.08	1.009	108.89	1.55	12.98	4.52
823	0.04	0					172	81	27.3797	1	52	2	0.5	1	0				6.62	1.86	5.59	1.01	18.068	3.64	65.1163	3.60396	0.94	0.362	71.03	1.46	12.36	4.09
824	2	0					155	52.5	21.8522	2	44	2	1.1	2	1	1	19	5.26316	4.71	0.75	4.34	1.32	30.4147	2.66	61.2903	2.01515	0.36	1.491	104.36	1.5	13.05	4.67
825	0.3	0					157	50	20.2848	2	37	2	0.3	1	0				4.56	0.62	5.7	2.2	38.5965	3.37	59.1228	1.53182	0.13	0.87	100.33	1.19	14.02	3.82
826	0.1	0					178	80	25.2493	1	31	1	0.8	1	1	3	5	60	4.58	1.75	4.91	1.09	22.1996	3.25	66.1914	2.98165	0.57	2.761	106.17	2.28	11.6	4.17
827	0.5	0					156	50	20.5457	2	20	1	2	1	1	26	74	35.1351	4.63	0.56	4.17	1.69	40.5276	2.31	55.3957	1.36686	0.17	1.138	98.23	1.38	12.41	4.34
828	0.06	0					155	44	18.3143	2	66	3	1.1	3	0				5.42	2.59	4.34	1.11	25.576	2.18	50.2304	1.96396	1.05	1.649	67.43	1.47	11.61	4.02
829	0.4	0					156	46	18.902	2	47	2	0.4	1	0				4.92	1.05	4.67	1.61	34.4754	2.65	56.7452	1.64596	0.41	2.211	110.29	1.58	13.21	3.91
830	0.1	0					161	49	18.9036	2	38	2	0.6	1	0				5.37	0.86	4.34	1.8	41.4747	2.21	50.9217	1.22778	0.33	0.954	71.19	1.66	11.37	4.29
831	0.2	0					160	60	23.4375	2	53	2	0.5	1	0				5.01	1.15	5.3	1.57	29.6226	3.29	62.0755	2.09554	0.44	0.675	87.74	1.13	12.45	3.5
832	0.5	0					165	70	25.7117	1	49	2	0.8	1	0				5.15	2.13	4.36	0.92	21.1009	2.85	65.367	3.09783	0.59	1.427	98.91	1.88	11.55	4.99
833	0.02	0					168	61	21.6128	2	47	2	0.5	5	0				5.37	0.52	4.05	1.65	40.7407	2.19	54.0741	1.32727	0.21	0.632	117.46	1.74	11.36	4.24
834	0.4	0					163	73	27.4756	2	29	1	1.5	1	1	2	11	18.1818	5.19	1.2	3.59	1.14	31.7549	2	55.7103	1.75439	0.45	1.236	86.04	1.66	15.06	4.47
835	0.4	0					168	66	23.3844	2	57	3	0.3	1	0				4.54	1.18	4.96	1.71	34.4758	2.86	57.6613	1.67251	0.39	5.858	87.7	1.55	12.55	4.22
836	0.3	0					164	56	20.8209	2	32	1	0.3	2	1	3	10	30	5.26	0.62	3.69	1.61	43.6314	1.74	47.1545	1.08075	0.34	1.521	113.28	1.53	14.19	3.99
837	0.1	0					162	53	20.1951	2	34	1	0.3	1	1	1	5	20	4.54	0.73	3.85	1.45	37.6623	2.02	52.4675	1.3931	0.38	1.708	85.18	1.68	11.21	4.35
838	0.4	0					156	55	22.6003	2	48	2	0.4	1	1	2	11	18.1818	5.07	0.91	4.61	1.1	23.8612	3.04	65.9436	2.76364	0.47	0.57	95.92	1.54	12.22	4.22
839	1	0					157	66	26.7759	2	48	2	0.3	1	1	1	13	7.69231	5.39	1.01	3.29	1.1	33.4347	1.73	52.5836	1.57273	0.46	1.709	102.65	1.51	13.29	3.61
840	0.5	0					164	60	22.3081	2	44	2	0.7	1	0				5.23	0.81	6.69	2.36	35.2765	3.88	57.997	1.64407	0.45	0.677	93.28	1.55	13.26	3.99
841	0.03	0					179	98	30.5858	1	42	2	0.8	1	0				6.57	1.68	5.62	1.08	19.2171	3.63	64.5907	3.36111	0.91	1.687	119.96	1.39	13.37	4.28
842	0.25	0					172	67	22.6474	1	37	2	0.4	1	0				5.89	1.45	4.72	1.09	23.0932	2.77	58.6864	2.54128	0.86	2.519	114.12	1.73	15.15	4.35
843	0.2	0					170	73	25.2595	1	53	2	0.7	3	1	2	13	15.3846	4.49	1.15	5.26	1.55	29.4677	2.97	56.4639	1.91613	0.74	1.505	95.33	1.31	14.31	3.79
844	0.4	0					160	47.5	18.5547	2	25	1	2.2	1	1	3	4	75	4.93	0.73	3.84	1.64	42.7083	2.05	53.3854	1.25	0.15	0.002	105.06	1.49	5.15	4.39
845	0.25	0					165	72	26.4463	1	35	2	0.5	2	1	5	6	83.3333	4.95	0.68	3.78	1.31	34.6561	2.17	57.4074	1.65649	0.3	2.11	117.02	1.22	13.61	4.66
846	0.2	1		1			156	80	32.8731	2	59	3	0.3	1	0				5.5	2.18	4.73	1.02	21.5645	2.99	63.2135	2.93137	0.72	1.95	102.74	1.26	14.72	3.34
847	0.2	0					155	57	23.7253	2	41	2	0.4	1	0				4.14	0.71	3.07	1.25	40.7166	1.45	47.2313	1.16	0.37	1.349	102.25	0.98	11.46	2.5
848	0.3	0					176	76	24.5351	1	55	2	0.6	1	0				4.77	2.18	3.78	0.92	24.3386	2.22	58.7302	2.41304	0.64	1.094	87.74	1.47	9.06	3.96
849	0.2	0					158	60	24.0346	2	54	2	1.4	2	1	1	12	8.33333	4.31	2.11	4.42	1.24	28.0543	2.55	57.6923	2.05645	0.63	2.782	102.46	1.58	11.67	4.52
850	0.3	0					160	71.5	27.9297	2	53	2	1.5	2	1	6	9	66.6667	6.02	3.45	5.31	1.25	23.5405	2.85	53.6723	2.28	1.21	2.576	69.63	1.37	12.5	3.36
851	3	0					158	58	23.2335	2	38	2	0.5	2	0				5.06	0.58	4.87	1.54	31.6222	2.92	59.9589	1.8961	0.41	0.38	76.91	1.23	14.7	3.72
852	0.2	1			1		158	63	25.2363	2	47	2	0.6	1	0				4.63	1.33	5.69	1.3	22.8471	3.6	63.2689	2.76923	0.79	3.441	83.15	1.72	12.58	4
853	2	0					160	56	21.875	2	49	2	0.4	1	0				4.54	0.53	6.06	2.14	35.3135	3.68	60.7261	1.71963	0.24	0.836	93.16	1.46	13.23	3.74
854	2	0					156	60	24.6548	2	53	2	3	3	0				4.65	1.71	5.08	1.44	28.3465	2.94	57.874	2.04167	0.7	0.412	73.34	1.74	13.89	4.24
855	0.3	0					158	65	26.0375	2	30	1	0.5	1	1	2	5	40	4.23	0.72	4.18	1.5	35.8852	2.41	57.6555	1.60667	0.27	5.53	98.42	1.57	12.55	4.18
856	0.5	0					180	85	26.2346	1	26	1	0.7	1	1	2	5	40	4.43	0.74	3.93	1.09	27.7354	2.55	64.8855	2.33945	0.29	1.004	108.93	1.43	15.49	3.72
857	7	0					168	69	24.4473	1	55	2	1.3	1	0				5.82	0.61	4.02	1.25	31.0945	2.64	65.6716	2.112	0.13	1.299	113.51	1.57	13.01	3.88
858	7	1			1		158	49	19.6283	2	50	2	0.5	1	0				5.98	1.94	6.08	2.36	38.8158	3.1	50.9868	1.31356	0.62	1.52	118.23	1.6	10.99	3.89
859	0.35	0					170	68	23.5294	1	36	2	1	1	1	12	17	70.5882	4.96	1.27	4.79	1.31	27.3486	3.07	64.0919	2.34351	0.41	0.841	88.1	1.25	13.77	3.62
860	2	0					160	65	25.3906	2	53	2	0.5	1	0				4.94	1.04	5.19	1.5	28.9017	3.31	63.7765	2.20667	0.38	1.136	100.89	1.64	11.81	4.09
861	0.45	0					160	68	26.5625	2	57	3	0.7	2	0				5.84	1.34	6.34	1.84	29.0221	3.93	61.9874	2.13587	0.57	1.205	79.7	1.75	15.49	4.17
862	2	0					158	60	24.0346	1	30	1	1.2	1	0				4.43	1.34	5.26	1.12	21.2928	3.49	66.3498	3.11607	0.65
863	0.1	1		1			160	56	21.875	2	53	2	0.1	1	1	2	24	8.33333	5.49	1.15	3.94	1.26	31.9797	2.23	56.599	1.76984	0.45	2.152	24.35	2.01	12.57	5.35
864	0.7	0					156	57	23.4221	2	35	2	0.4	1	0				4.72	2.1	4.76	1.31	27.521	2.72	57.1429	2.07634	0.73	3.091	94.94	1.53	11.49	3.82
865	0.35	0					171	71	24.281	1	32	1	0.8	1	1	2	5	40	4.66	1.08	4.18	0.93	22.2488	2.75	65.7895	2.95699	0.5	1.398	98.9	1.63	12.05	3.63
866	2	0					163	70	26.3465	2	56	3	0.3	2	0				5.12	0.59	4.55	1.56	34.2857	2.72	59.7802	1.74359	0.27	1.413	83.74	1.58	13.75	4.19
867	0.8	0					178	70	22.0932	1	27	1	1.5	1	1	5	12	41.6667	4.63	1.37	4.09	1.29	31.5403	2.3	56.2347	1.78295	0.5	0.937	112.26	1.65	16.33	4.58
868	3	0					170	65	22.4913	1	43	2	0.4	1	1	2	5	40	4.96	0.71	4.04	1.08	26.7327	2.42	59.901	2.24074	0.54	0.738	58.94	1.53	14.78	4.35
869	4	0					150	50	22.2222	2	60	3	2	2	0				6.09	1.6	6.06	1.3	21.4521	3.81	62.8713	2.93077	0.95	1.595	103.76	1.68	12.98	4.01
870	4	0					159	55	21.7555	2	44	2	1	1	0				4.69	0.8	4.48	1.39	31.0268	2.72	60.7143	1.95683	0.37	1.233	106.21	1.13	13.94	3.65
871	0.05	0					170	49	16.955	1	32	1	1	1	1	1	15	6.66667	4.98	0.76	4.22	1.62	38.3886	2.2	52.1327	1.35802	0.4	0.833	86.64	1.2	11.52	3.29
872	0.04	0					173	66.5	22.2193	1	50	2	0.5	1	0				5.81	1.78	3.91	0.83	21.2276	2.39	61.1253	2.87952	0.69	0.002	112.77	1.34	12.23	3.95
873	1	0					175	68	22.2041	1	36	2	0.5	1	0				5.68	1.57	3.86	1.24	32.1244	2.1	54.4041	1.69355	0.52	1.572	124.02	1.65	12.15	3.44
874	0.25	0					162	70	26.6728	2	59	3	1.5	2	0				5.26	0.62	3.14	1.29	41.0828	1.48	47.1338	1.14729	0.37	1.701	115.64	1.57	13.21	5.81
875	0.2	0					166	51.5	18.6892	2	31	1	0.4	2	0				4.83	0.65	4.07	1.65	40.5405	2.16	53.0713	1.30909	0.26	1.603	152.57	2.36	12.15	3.81
876	0.1	0					160	54	21.0938	2	49	2	4	1	1	3	6	50	5.01	0.88	4.13	1.88	45.5206	1.79	43.3414	0.952128	0.46	1.195	99.39	1.25	12.12	3.61
877	0.1	0					168	53	18.7783	2	25	1	1.1	1	0				4.81	0.49	5.28	2.14	40.5303	2.89	54.7348	1.35047	0.25	0.626	101.49	1.5	10.08	4.27
878	1	0					155	53	22.0604	2	42	2	1.8	1	1	1	60	1.66667	5.37	0.8	6.32	1.78	28.1646	4.06	64.2405	2.2809	0.48	2.217	93.26	1.43	12.3	3.77
879	5	0					160	59	23.0469	2	33	1	0.8	1	0				4.71	1	3.95	1.23	31.1392	2.17	54.9367	1.76423	0.55	2.698	81.85	1.33	12.21	3.46
880	0.1	1			1		159	62	24.5243	2	50	2	0.8	1	1	1	4	25	5.83	2.58	4.83	1.01	20.911	2.89	59.8344	2.86139	0.93	3.932	102.38	1.66	9.7	4.44
881	0.1	0					160	55	21.4844	2	39	2	0.7	1	0				5.23	0.53	4.04	1.27	31.4356	2.45	60.6436	1.92913	0.32	2.575	111.97	1.36	12.9	3.89
882	0.2	0					167	67	24.0238	2	54	2	0.5	1	0				5.5	1.31	4.15	1	24.0964	2.55	61.4458	2.55	0.6	0.912	96.4	1.46	13.78	3.61
883	0.02	0					163	72.5	27.2874	2	60	3	0.4	3	0				4.84	0.92	4.87	0.94	19.3018	3.32	68.1725	3.53191	0.61	2.12	78.86	1.8	14.17	5.12
884	0.2	0					164	60	22.3081	2	55	2	1	1	0				5.08	1.32	7.12	1.64	23.0337	4.76	66.8539	2.90244	0.72	2.057	63.12	1.6	13.57	3.91
885	0.02	0					156	56	23.0112	2	23	1	0.7	1	1	4	10	40	4.91	1.24	4.38	1.39	31.7352	2.51	57.3059	1.80576	0.48	0.99	88.41	1.48	13.12	4.3
886	N	0					158	52	20.83	2	35	2	0.3	1	0				5.02	0.66	4.04	1.73	42.8218	2	49.505	1.15607	0.31	0.916	118.72	1.44	12.58	3.94
887	0.35	0					155	55	22.8928	2	48	2	0.4	3	0				5.53	2.1	6.15	1.53	24.878	3.73	60.6504	2.43791	0.89	1.417	92.14	1.61	11.85	3.94
888	0.4	0					161	80	30.863	2	39	2	1.1	3	1	2	14	14.2857	5.51	1.06	4.58	1	21.8341	2.85	62.2271	2.85	0.73	1.228	88.82	1.47	13.75	4.11
889	0.2	0					158	62.5	25.0361	2	41	2	1.1	1	1	1	8	12.5	5.05	2.5	6	1.45	24.1667	3.59	59.8333	2.47586	0.96	1.532	113.29	1.49	13.02	3.63
890	0.1	0					178	83	26.1962	1	23	1	1.7	1	1	1	4	25	4.7	1.41	4.68	1.14	24.359	2.73	58.3333	2.39474	0.81	0.544	91.14	1.7	10.59	4.56
891	0.25	0					165	74	27.1809	1	45	2	0.7	3	1	6	7	85.7143	6.62	1.37	5.98	1.08	18.0602	3.94	65.8863	3.64815	0.96	0.076	70.15	1.75	11.69	4.63
892	0.03	0					167	80	28.6851	1	34	1	1.2	1	1	1	12	8.33333	6.3	2.63	4.75	0.8	16.8421	2.91	61.2632	3.6375	1.04	1.366	83.89	2.09	14.13	4.93
893	0.6	0					158	59	23.634	2	58	3	0.9	1	1	3	6	50	5.19	1.37	5.93	1.4	23.6088	3.82	64.4182	2.72857	0.71	2.178	99.03	1.35	12.99	3.74
894	N	0					158	68.5	27.4395	2	48	2	1.7	2	0				4.94	1.1	4.92	1.22	24.7967	3.07	62.3984	2.51639	0.63	2.08	115.88	1.46	13.71	3.74
895	0.3	0					160	78.5	30.6641	2	28	1	0.4	2	1	3	14	21.4286	4.92	1.45	3.96	1.22	30.8081	2.14	54.0404	1.7541	0.6	1.802	108.83	1.65	12.18	4.06
896	3	0					158	48	19.2277	2	70	3	1.5	3	0				4.79	0.69	5.42	2.37	43.7269	2.81	51.845	1.18565	0.24	1.314	92.92	1.52	11.15	3.8
897	N	0					167	64	22.9481	2	28	1	1.1	1	1	1	2	50	4.61	0.6	4.77	1.79	37.5262	2.7	56.6038	1.50838	0.28	0.002	63.31	1.51	14.5	4.29
898	3	0					174	77.5	25.5978	1	47	2	0.2	1	1	1	5	20	5.18	1.28	5.6	0.9	16.0714	3.99	71.25	4.43333	0.71	2.04	88.28	1.5	11.48	3.84
899	0.1	0					180	75	23.1481	1	48	2	0.3	2	0				6.38	1.78	5.25	1.21	23.0476	3.32	63.2381	2.7438	0.72	1.156	124.8	1.55	14.88	3.79
900	2	0					155	53	22.0604	2	58	3	0.3	2	0				5.08	1.57	5.78	1.65	28.5467	3.52	60.8997	2.13333	0.61	2.588	82.82	1.52	13.08	3.95
901	0.06	0					165	80	29.3848	2	49	2	1.3	2	0				4.97	2.95	5.65	1.51	26.7257	2.53	44.7788	1.6755	1.61	0.474	121.89	1.3	10.25	4.54
902	1	0					160	65	25.3906	2	60	3	1.6	1	1	2	15	13.3333	4.67	1.54	4.34	1.32	30.4147	2.53	58.2949	1.91667	0.49	4.532	86.62	1.85	10.99	3.55
903	3	0					168	82.5	29.2304	1	58	3	0.9	2	1	2	2	100	5.88	0.92	3.8	1.14	30	2.28	60	2	0.38	1.18	101.03	1.13	14.94	3.99
904	1	0					158	54	21.6311	2	37	2	0.6	2	0				4.66	0.98	3.66	1.37	37.4317	2.13	58.1967	1.55474	0.16	1.002	106.23	1.38	12.34	4.03
905	0.1	0					185	63	18.4076	1	25	1	0.8	2	1	10	12	83.3333	4.32	1.21	3.83	1.37	35.7702	2.06	53.7859	1.50365	0.4	1.047	100.74	1.62	13.46	3.98
906	5	0					155	46	19.1467	2	35	2	0.8	1	0				4.89	0.65	3.73	2.15	57.6408	1.33	35.6568	0.618605	0.25	2.038	107.76	1.52	13.37	4.2
907	0.35	0					170	54	18.6851	2	26	1	0.5	1	0				5.39	0.76	4.58	1.69	36.8996	2.41	52.6201	1.42604	0.48	1.548	111.92	1.42	14.46	4.59
908	0.5	0					170	60	20.7612	2	27	1	0.4	1	1	3	4	75	5.02	0.53	4.88	2.5	51.2295	2.19	44.877	0.876	0.19	1.359	75.94	1.39	13.27	4.11
909	4	0					160	55	21.4844	2	41	2	0.2	1	1	2	7	28.5714	5.43	1.26	3.42	1.04	30.4094	2.05	59.9415	1.97115	0.33	1.922	91.59	1.41	11.5	3.9
910	4	0								1	57	3	0.3	1	0				5.63	0.87	3.87	1.1	28.4238	2.55	65.8915	2.31818	0.22	1.093	106	1.48	11	4.32
911	0.1	0					172	75	25.3515	1	32	1	1.1	1	0				4.84	2.28	6.43	1.01	15.7076	4.26	66.2519	4.21782	1.16	3.12	90.33	1.49	13.12	3.61
912	0.4	0					165	60	22.0386	2	31	1	1.4	2	1	3	12	25	5.04	1.24	3.92	0.92	23.4694	2.55	65.051	2.77174	0.45	0.874	113.11	1.8	13.59	4.34
913	0.05	0					176	75	24.2123	1	37	2	1.1	2	0				4.93	1.98	4.57	1.31	28.6652	2.47	54.0481	1.8855	0.79	0.731	119.43	1.66	14.57	3.58
914	1	0					170	65	22.4913	2	20	1	0.8	1	0				4.77	1.07	4.67	1.26	26.9807	2.94	62.955	2.33333	0.47	2.187	98.21	1.32	14.01	4.19
915	0.35	0					162	62	23.6244	2	38	2	0.5	1	1	5	6	83.3333	4.84	2.13	3.76	0.9	23.9362	2.12	56.383	2.35556	0.74	2.214	127.71	1.55	12.95	4.47
916	0.3	0					160	54	21.0938	2	26	1	0.2	1	0				4.64	0.8	3.6	1.44	40	1.95	54.1667	1.35417	0.21	6.052	88.84	1.35	12.29	4.21
917	0.1	0					160	55	21.4844	2	67	3	0.5	2	0				4.58	2.23	4	1.37	34.25	1.94	48.5	1.41606	0.69	1.159	78.2	1.54	11.59	3.67
918	0.05	1			1		153	60	25.6312	2	31	1	0.4	1	0				4.53	1.72	3.82	1.08	28.2723	2.15	56.2827	1.99074	0.59
919	0.2	0					158	60	24.0346	2	63	3	1.5	1	0				4.93	1.33	4.15	1.24	29.8795	2.55	61.4458	2.05645	0.36	0.187	98.04	2	12.41	3.88
920	0.02	0					155	60	24.974	2	46	2	1.2	1	0				5.31	1.42	4.02	0.98	24.3781	2.58	64.1791	2.63265	0.46	1.944	118.65	1.36	12.48	4.63
921	1	0					158	49	19.6283	2	29	1	0.6	1	1	1	5	20	4.61	0.82	4.15	1.51	36.3855	2.34	56.3855	1.54967	0.3	1.328	97.7	1.46	13.21	3.65
922	0.03	0					167	70	25.0995	2	45	2	0.5	1	0				4.95	1.23	4.86	1.46	30.0412	2.93	60.2881	2.00685	0.47	1.18	87.53	1.53	12.03	3.7
923	4	0					161	53	20.4467	2	37	2	0.4	1	0				4.93	0.69	4.81	2.08	43.2432	2.51	52.183	1.20673	0.22	0.719	106.53	1.28	14	3.79
924	3	0					163	55	20.7008	2	36	2	0.5	1	0				5.16	0.64	4.01	1.75	43.6409	2.05	51.1222	1.17143	0.21	0.611	117.91	1.9	12.66	4.25
925	2	0					158	65	26.0375	2	35	2	0.8	1	0				5.04	1.59	5.21	1.46	28.023	3.24	62.1881	2.21918	0.51	1.456	91.84	1.18	13.78	3.46
926	3	0					160	45	17.5781	2	52	2	0.3	1	0				4.6	1.29	4.81	1.78	37.0062	2.5	51.9751	1.40449	0.53	1.576	111.5	1.59	12.98	3.77
927	0.5	0					161	53	20.4467	2	43	2	0.7	1	1	2	8	25	5.86	0.81	4.31	1.57	36.4269	2.4	55.6845	1.52866	0.34	1.578	101.15	1.67	12.9	4.68
928	0.1	0					154	42.5	17.9204	2	45	2	1	1	0				4.82	0.55	4.16	1.62	38.9423	2.36	56.7308	1.45679	0.18	2.607	98.72	1.5	13.11	3.66
929	2	0					160	48	18.75	2	30	1	0.7	1	1	3	22	13.6364	4.97	0.53	5.26	1.86	35.3612	3.18	60.4563	1.70968	0.22	0.914	101.96	1.47	12.36	3.36
930	0.3	0					158	62	24.8358	2	56	3	0.2	2	0				4.68	1.46	5.83	1.55	26.5866	3.73	63.9794	2.40645	0.55	1.133	111.31	1.54	12.03	4.04
931	0.7	0					156	43	17.6693	2	60	3	0.3	1	0				5.69	1.12	3.81	1.17	30.7087	2.2	57.7428	1.88034	0.44	0.949	85.96	1.64	13.88	4.74
932	0.05	0					165	47	17.2635	2	23	1	1.5	1	1	5	11	45.4545	4.58	0.49	4.38	1.58	36.0731	2.5	57.0776	1.58228	0.3	1.884	94.65	1.77	12.21	4.44
933	0.4	0					179	80	24.968	1	35	2	0.2	2	0				5.66	3.92	4.72	0.77	16.3136	2.57	54.4492	3.33766	1.38	1.036	89.69	1.55	14.02	4.39
934	0.08	0					158	63	25.2363	2	39	2	1.1	2	0				4.59	0.95	4.18	1.33	31.8182	2.42	57.8947	1.81955	0.43	0.97	105.76	1.49	12.28	3.68
935	0.02	0					158	59.5	23.8343	2	31	1	0.6	1	0				5	0.54	3.9	1.48	37.9487	2.11	54.1026	1.42568	0.31	1.648	114.46	1.52	13.52	4.43
936	5	0					164	63	23.4236	2	61	3	0.2	2	1	1	3	33.3333	5.43	1.26	4.91	1.31	26.6802	2.99	60.8961	2.28244	0.61	2.954	114.22	1.61	12.73	3.65
937	0.4	0					165	70	25.7117	1	35	2	0.3	2	0				5.95	0.96	3.53	0.89	25.2125	2.11	59.7734	2.37079	0.53	1.15	81.65	1.51	12.63	3.88
938	0.35	0					165	65	23.8751	2	57	3	0.8	1	0				5.58	1.11	5.31	1.42	26.742	3.23	60.8286	2.27465	0.66	2.549	83.16	1.39	13.05	3.66
939	0.4	0					162	60	22.8624	2	32	1	2	2	1	2	8	25	5.6	0.57	3.98	1.42	35.6784	2.2	55.2764	1.5493	0.36	1.127	102.08	1.57	14.06	4.78
940	0.5	0					157	45	18.2563	2	59	3	1	1	0				5.97	1.04	5.22	2.37	45.4023	2.27	43.4866	0.957806	0.58	2.055	89.38	1.59	12.07	4.39
941	2	0					150	56	24.8889	2	39	2	1	6	1	4	4	100	5.14	1.29	5.2	1.52	29.2308	3	57.6923	1.97368	0.68	1.43	93.17	1.58	11.45	4.07
942	0.5	0					156	43	17.6693	2	42	2	1	1	0				5.51	0.42	4.27	1.84	43.0913	2.19	51.2881	1.19022	0.24	0.521	94.5	1.36	14.68	3.95
943	2	0					163	76	28.6048	2	46	2	1	1	0				5.09	0.98	4.17	1.54	36.9305	2.24	53.717	1.45455	0.39	1.356	110.88	1.53	11.54	3.84
944	0.06	0					170	87	30.1038	1	57	3	1	1	1	2	13	15.3846	5.98	1.43	5.89	1.13	19.1851	3.88	65.8744	3.43363	0.88	1.37	109.18	1.66	11.63	4.28
945	5	0					170	69	23.8754	1	47	2	0.5	1	1	2	4	50	6.05	1.87	3.97	1.04	26.1965	2.22	55.9194	2.13462	0.71	1.23	85.66	1.77	12.39	4.55
946	2	0					168	70	24.8016	1	33	1	1	1	1	1	1	100	5.42	1.68	3.95	0.85	21.519	2.27	57.4684	2.67059	0.83	2.519	111.33	1.55	14.14	4.03
947	5	0					163	66	24.841	2	50	2	1	1	0				5	0.94	4.95	1.92	38.7879	2.62	52.9293	1.36458	0.41	1.494	128.63	2.02	14.63	3.84
948	2	0					172	80	27.0416	1	30	1	1.4	2	1	1	1	100	5.07	1.21	4.28	1.07	25	2.6	60.7477	2.42991	0.61	1.228	103.92	1.56	11.2	4.2
949	0.5	0					165	72	26.4463	1	48	2	0.7	3	1	2	4	50	6.03	3.29	4.18	1.01	24.1627	2.01	48.0861	1.9901	1.16	1.144	96.38	1.25	12.66	3.56
950	0.9	0					165	69	25.3444	2	28	1	1	2	0				4.92	0.84	4.28	1.49	34.8131	2.4	56.0748	1.61074	0.39	1.585	126.26	1.74	14.24	4.75
951	0.05	0					164	62	23.0518	2	34	1	0.4	1	0				4.41	0.55	4.64	1.39	29.9569	2.77	59.6983	1.99281	0.48	1.6	101.52	1.78	12.43	4.76
952	2	0					156	59	24.2439	2	37	2	0.1	1	0				5.28	0.97	4.15	1.76	42.4096	2	48.1928	1.13636	0.39	1.077	102.58	1.19	12.8	4.21
953	3	0					158	70	28.0404	2	65	3	3	1	1	3	37	8.10811	5.64	1.69	6.05	1.57	25.9504	3.69	60.9917	2.35032	0.79	3.57	104.46	1.11	15.1	3.47
954	5	0					160	58	22.6562	2	41	2	0.7	1	0				4.83	0.85	4.77	1.71	35.8491	2.7	56.6038	1.57895	0.36	1.372	110.59	1.36	12.98	3.78
955	0.1	0					157	60	24.3418	2	45	2	1.5	2	0				5.88	1.25	3.95	1.04	26.3291	2.36	59.7468	2.26923	0.55	2.191	102.77	1.48	13.78	3.75
956	8	0					162	51	19.433	2	38	2	1	2	1	4	15	26.6667	4.96	0.93	4.57	1.38	30.1969	2.55	55.7987	1.84783	0.64	1.017	88.65	1.6	14	3.24
957	5	0					160	68	26.5625	2	45	2	1	1	0				5.22	1.62	5.26	1.09	20.7224	3.38	64.2586	3.10092	0.79	1.432	77.25	1.83	13.16	3.89
958	N	0					160	60	23.4375	2	52	2	1	3	1	1	8	12.5	5.34	0.8	4.84	1.19	24.5868	3.15	65.0826	2.64706	0.5	1.769	76.01	1.47	12.44	4.77
959	1	0					168	69	24.4473	1	51	2	1	2	1	4	23	17.3913	5.57	2	4.67	1.09	23.3405	2.87	61.4561	2.63303	0.71	1.635	113.62	1.43	12.37	4.2
960	0.1	0					161	52	20.061	2	54	2	1	1	0				4.94	0.89	5.86	1.33	22.6962	3.72	63.4812	2.79699	0.81	1.262	96.81	1.57	12.18	4.16
961	1	0					156	57	23.4221	2	57	3	1	3	0				5.28	1.98	5.72	1.02	17.8322	3.76	65.7343	3.68627	0.94	1.596	96.47	1.55	11.32	3.9
962	1.5	0					160	61	23.8281	2	58	3	1	1	0				6.06	2.4	5.5	1.24	22.5455	3.11	56.5455	2.50806	1.15	0.633	98.51	1.61	12.18	3.9
963	2	0					157	55	22.3133	2	28	1	1	1	0				4.67	0.46	3.47	1.48	42.6513	1.65	47.5504	1.11486	0.34	1.27	102.77	1.51	12.34	3.88
964	0.5	0					156	51	20.9566	2	32	1	1	1	1	1	8	12.5	4.89	1.07	3.14	0.98	31.2102	1.69	53.8217	1.72449	0.47	1.245	121.28	1.5	13.29	4.18
965	N	0					172	70	23.6614	1	72	3	2	1	0				6.02	1.85	5.04	1.59	31.5476	2.58	51.1905	1.62264	0.87	0.647	97.56	1.22	12.52	3.43
966	0.05	0					165	68	24.977	2	62	3	2.2	3	1	1	4	25	4.89	2.85	5.32	0.94	17.6692	3.15	59.2105	3.35106	1.23	2.735	115.49	1.42	10.96	3.7
967	0.45	0					174	64	21.1389	1	30	1	0.5	1	0				4.81	1.72	4.55	0.83	18.2418	2.88	63.2967	3.46988	0.84	1.3	106.14	1.78	12.71	4.09
968	0.5	0					158	55	22.0317	2	41	2	0.7	1	0				4.94	1.01	3.36	1.26	37.5	1.67	49.7024	1.3254	0.43	0.989	118.84	1.64	12.61	4.55
969	0.2	0					169	57	19.9573	1	47	2	2	1	1	1	2	50	4.66	0.65	4.98	2.12	42.5703	2.48	49.7992	1.16981	0.38	1.669	96.82	1.67	13.19	4.44
970	3	0					158	56	22.4323	2	35	2	0.5	2	1	1	11	9.09091	5	1.52	4.55	1.15	25.2747	2.6	57.1429	2.26087	0.8	1.064	118.26	1.52	11.54	4.88
971	0.15	0					162	56	21.3382	2	25	1	1	1	1	2	4	50	4.26	0.73	3.63	1.18	32.5069	2.08	57.3003	1.76271	0.37	0.566	82.36	1.71	11.53	4.42
972	0.3	0					176	78	25.1808	1	56	3	1	1	0				5.64	0.88	3.44	1.06	30.814	1.86	54.0698	1.75472	0.52	1.779	111.49	1.56	12.52	4.07
973	N	0					173	62	20.7157	2	32	1	0.5	1	0				4.86	1	5.62	1.83	32.5623	3.32	59.0747	1.81421	0.47	1.736	97.59	1.42	12.53	4.7
974	0.5	0					162	66	25.1486	2	62	3	1.5	1	0				4.57	0.91	3.92	1.11	28.3163	2.18	55.6122	1.96396	0.63	1.648	132.1	1.47	11.61	4.27
975	2	0					160	60	23.4375	2	45	2	0.7	3	1	1	4	25	5.52	0.48	3.81	1.3	34.1207	2.18	57.2178	1.67692	0.33	0.861	114.41	1.56	13.21	4.39
976	3	0					152	55	23.8054	2	65	3	0.5	1	1	1	2	50	5.27	0.86	4.05	1.92	47.4074	1.66	40.9877	0.864583	0.47	1.003	100.22	1.32	11.91	3.99
977	0.1	0					170	79	27.3356	1	37	2	0.2	1	0				4.98	2.26	4.07	0.93	22.8501	2.29	56.2654	2.46237	0.85	2.258	114.19	1.56	11.87	4.75
978	0.4	0					160	63	24.6094	2	36	2	0.4	1	1	6	9	66.6667	6.65	1.02	5.36	1.55	28.9179	3.25	60.6343	2.09677	0.56	0.989	94.79	1.38	13.07	4.15
979	0.5	0					162	64	24.3865	2	42	2	0.2	1	0				5.31	1.25	4.84	1.22	25.2066	2.98	61.5702	2.44262	0.64	1.173	113.64	1.58	12.28	4.44
980	0.02	0					159.5	58.5	22.9951	2	39	2	0.7	1	0				4.82	0.86	3.47	1.41	40.634	1.69	48.7032	1.19858	0.37	1.963	117.36	1.5	12.19	4.08
981	2	1			1		170	68	23.5294	1	54	2	0.3	1	0				5.2	0.79	4.21	1.2	28.5036	2.56	60.8076	2.13333	0.45	1.616	94.69	1.84	11.93	4.91
982	0.6	0					158	55.5	22.232	2	42	2	0.9	2	0				4.84	0.78	3.77	1.6	42.4403	1.8	47.7454	1.125	0.37	1.238	82.4	1.57	12.92	4.27
983	8	0					160	67	26.1719	2	56	3	0.2	3	1	1	4	25	6.8	0.86	4.76	1.71	35.9244	2.48	52.1008	1.45029	0.57	1.246	135.48	1.39	15.75	5.25
984	0.2	0					156	64	26.2985	2	51	2	1.7	1	0				5.49	1.22	3.84	1.64	42.7083	1.79	46.6146	1.09146	0.41	1.321	97.94	1.8	14.33	5.21
985	3	0					172	85	28.7317	2	66	3	0.6	2	0				5.87	0.81	4.26	1.24	29.108	2.54	59.6244	2.04839	0.48	2.132	120.15	1.63	11.47	4.95
986	0.5	0					157	62	25.1532	2	51	2	0.6	1	0				4.91	0.92	4.05	1.48	36.5432	2.14	52.8395	1.44595	0.43	0.681	85.54	1.87	12.59	5.6
987	0.5	0					166	61	22.1367	2	50	2	0.4	1	0				5.75	1.06	6.06	1.91	31.5182	3.79	62.5413	1.98429	0.36	4.068	101.95	2.07	10.14	4.47
988	5	0					161	51	19.6752	2	47	2	0.3	2	0				5.49	1	4.38	1.42	32.4201	2.45	55.9361	1.72535	0.51	1.654	97.43	1.32	13.06	4.39
989	0.8	0					152	50	21.6413	2	40	2	0.1	1	0				5.48	1.92	4.12	0.79	19.1748	2.62	63.5922	3.31646	0.71	1.758	79.46	1.56	10.53	4.17
990	0.2	0								1	34	1	0.3	1	1	4	11	36.3636	5.44	0.88	4.79	1.1	22.9645	3.18	66.3883	2.89091	0.51	1.109	77.48	1.63	12.95	4.19
991	6	0					162	65	24.7676	2	29	1	0.7	1	0				5.06	2	4.34	1.48	34.1014	2.2	50.6912	1.48649	0.66	3.503	79.16	1.42	9.99	3.91
992	2	0					163	65	24.4646	2	41	2	0.9	1	1	6	8	75	4.85	1.45	4.16	1	24.0385	2.66	63.9423	2.66	0.5	1.805	130.14	1.42	13.92	4.48
993	0.5	0					160	60	23.4375	2	48	2	0.5	1	0				4.95	1.75	3.82	0.98	25.6545	2.07	54.1885	2.11224	0.77	1.019	78.18	1.39	12.22	4.32
994	0.2	0					150	43	19.1111	2	47	2	1.2	2	0				5.39	1.01	3.61	1.05	29.0859	2.28	63.1579	2.17143	0.28	2.94	105.74	1.42	11.92	4.01
995	0.1	0					171	70	23.939	2	34	1	1.2	1	1	3	4	75	4.45	0.81	3.28	1.5	45.7317	1.64	50	1.09333	0.14	0.721	112.2	1.73	12.25	4.75
996	0.1	0					157	57	23.1247	2	33	1	0.7	1	1	1	9	11.1111	4.43	0.77	3.25	1.39	42.7692	1.68	51.6923	1.20863	0.18	2.127	89.88	1.59	11.41	4.75
997	0.1	0					153	55	23.4952	2	43	2	0.4	1	1	1	5	20	4.94	1.22	3.57	0.92	25.7703	2.16	60.5042	2.34783	0.49	0.614	89.75	1.12	13.34	4.15
998	0.5	0					162	62	23.6244	2	50	2	0.5	1	0				4.69	0.68	3.84	1.63	42.4479	2.05	53.3854	1.25767	0.16	2.283	86.95	1.2	12.08	3.94
999	5	0					158	72.5	29.0418	2	51	2	1.2	1	1	1	6	16.6667	4.62	0.95	3.64	1.68	46.1538	1.68	46.1538	1	0.28	1.168	94.69	1.47	13.16	4.48
1000	2	0					159	65	25.711	2	53	2	0.8	2	0				5.39	1.76	5.62	1.18	20.9964	3.8	67.6157	3.22034	0.64	1.773	113.22	1.54	12.7	4.69
1001	0.7	0					167	55	19.721	2	38	2	1	1	0				4.87	0.73	3.5	1.26	36	1.94	55.4286	1.53968	0.3	2.072	89.01	1.11	10.6	3.37
1002	0.02	0					163	63	23.7118	2	46	2	1	5	1	1	6	16.6667	5.49	1.27	3.55	0.91	25.6338	1.96	55.2113	2.15385	0.68	1.019	78.6	1.49	11.19	3.96
1003	1	0					162	61	23.2434	2	52	2	0.4	3	0				4.97	0.92	3.06	1.02	33.3333	1.72	56.2092	1.68627	0.32	2.995	117.19	1.39	11.15	4.58
1004	0.1	0					162	61	23.2434	1	47	2	0.3	1	0				6.65	1.14	3.93	0.77	19.5929	2.59	65.9033	3.36364	0.57	0.509	102.58	1.51	14.44	4.24
1005	0.05	0					162	70	26.6728	1	50	2	0.4	2	1	1	6	16.6667	5.04	1.89	4.17	1.03	24.7002	2.58	61.8705	2.50485	0.56	1.194	96.04	1.55	13.17	4.34
1006	5	0					168	56	19.8413	2	23	1	0.7	2	1	3	4	75	4.27	0.68	3.31	1.32	39.8792	1.69	51.0574	1.2803	0.3	1.205	93.67	1.48	12.5	5.19
1007	0.5	0					151	47.5	20.8324	2	28	1	0.5	1	1	1	1	100	4.63	0.74	3.41	1.21	35.4839	1.99	58.3578	1.64463	0.21	1.183	104.54	1.78	14.32	4.33
1008	0.1	1		1			162	56	21.3382	2	56	3	1.5	1	0				5.44	1.9	5.43	1	18.4162	3.67	67.5875	3.67	0.76	1.267	119.81	1.46	14.4	5.52
1009	1	0					162	52	19.8141	2	45	2	0.3	3	0				4.71	0.4	4.35	1.61	37.0115	2.54	58.3908	1.57764	0.2	0.911	101.88	1.63	13.41	4.03
1010	0.5	0					160	48	18.75	2	34	1	1.1	2	1	1	17	5.88235	4.34	1.05	3.3	1.43	43.3333	1.68	50.9091	1.17483	0.19	5.808	101.45	1.59	11.99	3.93
1011	3	1	1				155	52	21.6441	2	54	2	0.4	1	0				5.46	1.7	5.58	1.19	21.3262	3.55	63.6201	2.98319	0.84	2.251	92.56	1.46	11.92	4.4
1012	0.1	0					173	90	30.0712	2	31	1	0.4	1	1	2	4	50	4.57	1.35	3.91	0.97	24.8082	2.41	61.6368	2.48454	0.53	1.523	102.15	1.37	10.81	4.26
1013	0.1	1			1		176	59	19.047	1	56	3	1.1	1	0				5.56	1.08	5.29	1.44	27.2212	3.15	59.5463	2.1875	0.7	0.888	86.68	1.75	11.3	4.82
1014	2	0					167	61	21.8724	1	56	3	2	1	1	2	6	33.3333	5.35	3.5	5.17	1.27	24.5648	2.75	53.1915	2.16535	1.15	1.48	87.86	1.18	11.9	3.54
1015	0.1	0					157	51.5	20.8933	2	55	2	0.6	1	0				5.08	1.38	6.02	1.73	28.7375	3.33	55.3156	1.92486	0.96	1.829	97.4	1.59	12.7	4.99
1016	1	0					155	58	24.1415	2	63	3	0.8	2	0				5.28	1.36	5.08	1.29	25.3937	3.15	62.0079	2.44186	0.64	4.527	120.67	1.9	12.93	4.43
1017	0.02	0					160	52	20.3125	2	27	1	2	1	1	2	16	12.5	4.45	0.55	3.25	1.33	40.9231	1.6	49.2308	1.20301	0.32	2.113	96.92	1.95	13.38	4.58
1018	3	0					158	44	17.6254	2	52	2	0.8	1	1	2	4	50	4.77	0.74	4.07	1.65	40.5405	1.96	48.1572	1.18788	0.46	1.511	122.12	1.53	11.61	4.51
1019	0.1	0					145	57	27.1106	2	38	2	2	1	1	1	7	14.2857	5.79	1.04	5.8	1.46	25.1724	3.75	64.6552	2.56849	0.59	1.723	113.98	1.76	12.05	4.43
1020	0.1	0					173	68	22.7204	1	28	1	0.8	1	1	3	4	75	4.82	0.77	3.55	0.91	25.6338	2.22	62.5352	2.43956	0.42	0.718	105.14	1.52	15.24	4.07
1021	0.8	0					157	50	20.2848	2	47	2	0.2	1	0				4.45	0.82	4.46	1.5	33.6323	2.65	59.417	1.76667	0.31	0.914	132.25	1.57	12.6	4.33
1022	10	0					160	60	23.4375	2	33	1	0.7	1	1	4	24	16.6667	4.64	2.36	4.3	0.88	20.4651	2.53	58.8372	2.875	0.89	0.846	118.78	1.37	13.16	3.49
1023	N	0					163	50	18.8189	2	33	1	0.2	1	0				4.74	0.7	3.99	1.57	39.3484	2.25	56.391	1.43312	0.17	1.169	111.05	1.45	13.02	4.41
1024	0.5	0					170	70	24.2215	1	61	3	1	1	1	2	5	40	4.9	0.47	3.19	1.11	34.7962	1.81	56.7398	1.63063	0.27	0.992	81.32	1.51	13.35	4.21
1025	0.04	0					169	68	23.8087	1	43	2	1.5	1	0				5.15	0.77	3.42	1.43	41.8129	1.71	50	1.1958	0.28	1.255	102	1.19	12.63	4.73
1026	0.03	0					160	59	23.0469	2	42	2	0.3	1	0				5.16	1.11	4.64	1.59	34.2672	2.39	51.5086	1.50314	0.66	1.064	98.86	1.73	13.42	4.83
1027	0.5	0					160	51	19.9219	2	20	1	1.4	1	1	2	2	100	4.72	1.43	4.98	1.57	31.5261	2.71	54.4177	1.72611	0.7	1.059	107.71	2.02	11.93	4.31
1028	3	0					172	72	24.3375	1	40	2	0.3	3	0				4.91	1.18	4.22	1	23.6967	2.67	63.2701	2.67	0.55	1.877	108.2	1.6	13.95	4.97
1029	0.04	0					160	50.5	19.7266	2	47	2	0.4	1	1	1	2	50	4.59	2.98	4.61	1.01	21.9089	2.67	57.9176	2.64356	0.93	1.131	33.99	1.64	12.84	4.88
1030	11	0					162	52	19.8141	2	71	3	0.3	1	1	2	4	50	5.01	2.3	5.7	1.2	21.0526	3.54	62.1053	2.95	0.96	1.375	101.34	1.47	11.4	4.33
1031	0.2	0					157	55	22.3133	2	36	2	2.7	1	1	3	26	11.5385	4.56	2.41	5.38	1.99	36.9888	2.69	50	1.35176	0.7	109.133	112.87	1.65	12.45	4.79
1032	5	1	1		1		150	65	28.8889	2	41	2	0.6	2	0				5.38	3.93	5.41	0.71	13.1238	3.06	56.5619	4.30986	1.64	1.308	89.2	1.7	13.56	4.45
1033	0.7	0					160	52	20.3125	2	28	1	2.2	1	0				4.73	1.12	4.1	1.39	33.9024	2.3	56.0976	1.65468	0.41	1.782	103.31	2.04	5.97	4.88
1034	0.1	0					178	73	23.04	1	59	3	2	2	1	8	37	21.6216	5.25	2.2	5.08	0.79	15.5512	3.25	63.9764	4.11392	1.04	0.346	108.19	1.46	11.87	4.3
1035	0.1	0					160	56	21.875	2	30	1	0.5	1	0				4.55	0.59	4.56	1.36	29.8246	2.99	65.5702	2.19853	0.21	1.02	110.04	1.1	13.17	4.59
1036	1	0					163	63	23.7118	2	35	2	0.9	1	1	2	16	12.5	4.9	1.37	3.97	1.24	31.2343	2.11	53.1486	1.70161	0.62	3.217	99.55	1.12	12.2	4.02
1037	0.4	0					160	45	17.5781	2	43	2	0.2	1	0				4.76	0.98	3.77	1.11	29.443	2.14	56.7639	1.92793	0.52	1.711	97.87	1.73	14.64	4.36
1038	0.9	1				1	160	54	21.0938	2	54	2	0.6	1	1	1	7	14.2857	4.67	1.23	4.73	1.45	30.6554	2.67	56.4482	1.84138	0.61	2.162	99.28	1.52	12.5	3.49
1039	0.1	0					162	60	22.8624	2	46	2	0.6	4	0				5.71	1.45	3.74	1.31	35.0267	1.75	46.7914	1.33588	0.68	1.529	96.86	1.34	11.85	4.86
1040	N	0					160	50	19.5312	2	36	2	0.8	1	0				5.24	0.58	3.84	1.43	37.2396	2.18	56.7708	1.52448	0.23	0.84	109.34	1.42	12.72	4.51
1041	N	0					165	55	20.202	2	62	3	0.2	1	0				4.91	0.77	3.46	1.41	40.7514	1.77	51.1561	1.25532	0.28	0.991	113.72	1.46	13.73	4.65
1042	N	0					155	56	23.3091	2	62	3	0.5	1	0				6.02	1.76	4.66	1.22	26.1803	2.79	59.8712	2.28689	0.65	1.282	120.83	1.68	14.05	3.9
1043	0.1	0					158	62	24.8358	2	27	1	0.4	1	0				3.99	0.51	3.37	1.62	48.0712	1.46	43.3234	0.901235	0.29	1.427	130.17	1.48	13.82	4.1
1044	1	0					170	60	20.7612	2	58	3	0.3	3	1	1	18	5.55556	5.36	1.31	4.2	1.33	31.6667	2.14	50.9524	1.60902	0.73	0.599	105.02	1.3	13.74	4.96
1045	0.06	1			1		160	63	24.6094	2	43	2	1.3	1	0				4.48	1.53	4.05	1.27	31.358	2.08	51.358	1.6378	0.7	1.102	116.26	1.61	12.5	3.95
1046	6	0					165	59	21.6713	2	48	2	0.3	1	0				4.63	0.86	3.56	1.46	41.0112	1.77	49.7191	1.21233	0.33	1.841	108	1.07	12.71	5.09
1047	0.1	0					152	38	16.4474	2	59	3	0.1	1	0				5.87	0.66	5.1	1.78	34.902	2.87	56.2745	1.61236	0.45	1.025	95.86	1.37	14.26	3.66
1048	8	0					155	59	24.5578	2	31	1	1.2	1	0				4.85	0.76	3.69	1.25	33.8753	2.02	54.7425	1.616	0.42	1.443	78.48	1.48	12.67	5.68
1049	0.02	0					168	81	28.699	1	56	3	0.5	2	1	3	4	75	5.46	3.97	5.67	1.06	18.6949	3.26	57.4956	3.07547	1.35	1.979	99.7	1.94	11.82	3.71
1050	1	0					160	58.5	22.8516	2	49	2	0.8	3	1	5	11	45.4545	6.04	1.59	4.07	0.92	22.6044	2.52	61.9165	2.73913	0.63	1.132	66.44	1.44	11.82	4.63
1051	0.2	0					166	70	25.4028	1	26	1	0.4	1	0				4.77	1.44	4.5	1.08	24	2.56	56.8889	2.37037	0.86	2.268	95.11	1.61	13.11	4.37
1052	0.9	0					160	50	19.5312	2	36	2	0.8	2	1	3	4	75	4.47	0.92	4.22	1.67	39.5735	2.08	49.2891	1.24551	0.47	2.23	60.54	1.83	11.36	4.1
1053	0.1	0					158	50	20.0288	2	38	2	1.1	3	1	1	5	20	4.48	1.38	3.55	1.08	30.4225	1.85	52.1127	1.71296	0.62	2.808	109.29	1.47	12.6	5.13
1054	0.3	1			1		158	44	17.6254	2	40	2	2.8	3	1	18	29	62.069	4.78	1.05	4.23	1.41	33.3333	2.3	54.3735	1.63121	0.52	3.867	111.65	1.59	10.16	4.71
1055	3	0					180	80	24.6914	1	29	1	0.5	1	1	2	6	33.3333	5.15	1.87	4.8	0.95	19.7917	2.85	59.375	3	1	1.172	109.42	1.65	12.31	4.74
1056	0.1	0					156	52	21.3675	2	59	3	0.9	1	0				5.02	1.89	4.85	1.48	30.5155	2.6	53.6082	1.75676	0.77	2.151	113.58	1.91	14.54	4.54
1057	0.06	0					161	52.5	20.2538	2	39	2	1.1	1	0				4.98	0.94	5.46	1.44	26.3736	3.47	63.5531	2.40972	0.55	2.025	99.62	1.92	11.98	5.01
1058	0.75	0					164	75	27.8852	1	43	2	0.3	1	0				4.83	1.2	3.8	1.03	27.1053	2.26	59.4737	2.19417	0.51	1.41	106.67	1.47	14.54	5.12
1059	0.02	0					168	61	21.6128	2	53	2	0.6	1	0				5.03	1.33	5.1	1.36	26.6667	3.12	61.1765	2.29412	0.62	1.48	110.83	1.68	11.36	4.83
1060	0.5	0					179	68	21.2228	1	49	2	0.3	1	0				4.27	1.49	4.08	1.21	29.6569	2.19	53.6765	1.80992	0.68	3.044	102.93	1.8	13.67	4.27
1061	0.05	0					162	68	25.9107	2	32	1	2.4	3	1	5	25	20	4.25	1.73	3.95	1.12	28.3544	2.33	58.9873	2.08036	0.5	2.397	117.88	1.6	11.97	5.36
1062	0.5	0					166	60	21.7738	2	69	3	0.8	1	0				5.24	0.97	4.26	1.5	35.2113	2.11	49.5305	1.40667	0.65	0.851	91.75	1.47	12.2	5.01
1063	1	0					165	59	21.6713	2	49	2	0.4	1	0				4.9	0.78	4.23	1.19	28.1324	2.65	62.6478	2.22689	0.39	3.569	102.53	1.55	11.49	4.9
1064	0.8	0					155	45	18.7305	2	28	1	0.6	1	1	3	5	60	4.44	0.68	4.61	1.93	41.8655	2.41	52.2777	1.2487	0.27	0.022	149.55	1.56	13.78	5
1065	3	0					159	68	26.8977	2	34	1	0.5	1	0				5.1	1.57	4.41	1.15	26.0771	2.68	60.771	2.33043	0.58	3.042	103.74	1.84	12.32	4.73
1066	0.05	0					167	54.5	19.5418	2	47	2	0.5	1	0				5.14	0.74	3.37	1.04	30.8605	1.96	58.1602	1.88462	0.37	0.802	100.03	1.31	13.65	5.27
1067	0.1	1			1		162	60	22.8624	2	54	2	2	2	1	1	6	16.6667	4.43	1.43	5.54	1.21	21.8412	3.59	64.8014	2.96694	0.74	1.027	94.08	1.55	13.28	4.26
1068	0.5	0					157	54	21.9076	2	58	3	0.5	2	0				4.63	3.08	4.99	1.18	23.6473	2.56	51.3026	2.16949	1.25	0.986	84.22	1.86	12.4	5.2
1069	0.1	0					163	55	20.7008	2	38	2	0.7	3	1	2	4	50	4.93	0.74	4.86	1.3	26.749	3.14	64.6091	2.41538	0.42	1.158	75.85	1.62	12.32	4.36
1070	0.08	0					157	46	18.662	2	27	1	0.7	1	1	2	11	18.1818	4.86	0.99	4.13	1.47	35.5932	2.18	52.7845	1.48299	0.48	2.864	107.01	1.45	13.67	5
1071	1	0					150	62.5	27.7778	2	35	2	1.3	1	1	3	9	33.3333	5.17	1.3	4.47	1.15	25.7271	2.65	59.2841	2.30435	0.67	1.796	118.83	1.53	14.06	4.84
1072	1	0					165	57	20.9366	1	59	3	0.5	2	0				4.57	0.98	4.69	1.75	37.3134	2.49	53.0917	1.42286	0.45	0.496	116.42	1.57	11.3	5.09
1073	0.7	0					170	59	20.4152	2	29	1	0.5	1	0				4.49	0.56	4.16	1.27	30.5288	2.4	57.6923	1.88976	0.49	2.093	120.76	1.54	11.24	4.5
1074	0.8	0					165	62	22.7732	2	37	2	0.3	2	1	8	15	53.3333	4.46	1.53	4.24	0.9	21.2264	2.67	62.9717	2.96667	0.67	2.705	100.33	1.41	13.53	5.13
1075	0.1	0					162	58	22.1003	2	43	2	0.6	1	1	3	14	21.4286	5.41	1.69	5.41	1.74	32.1627	3.07	56.7468	1.76437	0.6	2.198	120.46	1.74	13.59	4.95
1076	0.25	0					164	52	19.3337	2	36	2	1.3	1	1	2	11	18.1818	4.62	1.37	4.65	0.93	20	3.1	66.6667	3.33333	0.62	1.632	103.93	1.45	11.98	4.04
1077	0.1	0					170	65	22.4913	1	30	1	0.5	1	1	3	9	33.3333	4.36	0.46	3.62	1.73	47.7901	1.7	46.9613	0.982659	0.19	2.58	80.06	1.32	11.72	5.04
1078	N	0					167	65	23.3067	2	49	2	0.2	1	0				5.29	1.63	4.24	1.1	25.9434	2.21	52.1226	2.00909	0.93	0.974	88.53	1.5	10.72	4.36
1079	0.9	0					153	56.5	24.136	2	60	3	0.8	1	0				5.42	1.85	6.96	1.69	24.2816	4.31	61.9253	2.5503	0.96	0.737	76.91	1.55	12.83	4.98
1080	0.6	0					151	48	21.0517	2	50	2	0.4	2	0				4.94	1.61	5.96	1.34	22.4832	3.77	63.255	2.81343	0.85	1.502	64.77	1.41	13.88	4.86
1081	3	0					170	65	22.4913	2	48	2	0.5	1	1	3	5	60	4.62	0.93	3.38	0.96	28.4024	1.84	54.4379	1.91667	0.58	1.743	95.84	1.61	12.71	4.32
1082	1	0					155	53	22.0604	2	59	3	0.3	1	0				5.58	1.08	5.59	1.36	24.3292	3.46	61.8962	2.54412	0.77	1.995	100.07	1.38	11.5	4.06
1083	0.1	0					158	65	26.0375	2	57	3	0.8	1	0				5.43	1.86	5.62	1.01	17.9715	3.62	64.4128	3.58416	0.99	1.891	92.08	1.59	12.08	4.77
1084	0.1	0					175	76	24.8163	1	51	2	1	1	1	3	4	75	5.23	3.26	4.14	1.11	26.8116	1.74	42.029	1.56757	1.29	0.991	126.98	1.39	10.27	3.99
1085	1	0					173	61.5	20.5486	1	41	2	0.5	1	1	2	7	28.5714	4.71	1.44	4.23	0.85	20.0946	2.67	63.1206	3.14118	0.71	0.783	106.41	1.65	12.59	4.56
1086	0.05	0					158	64	25.6369	2	41	2	0.6	1	0				5.98	1.7	4.54	0.93	20.4846	2.93	64.5374	3.15054	0.68	1.207	103.71	1.66	13.63	5.25
1087	2	0					170	54.6	18.8927	1	47	2	0.4	1	0				4.54	0.8	3.34	1.1	32.9341	1.74	52.0958	1.58182	0.5	0.532	82.65	1.33	11.39	4.23
1088	0.6	0					158	58	23.2335	2	32	1	0.7	1	1	1	8	12.5	5.03	0.9	3.95	1.47	37.2152	1.9	48.1013	1.29252	0.58	0.809	96.31	1.37	9.94	5.26
1089	0.5	0					160	60	23.4375	2	41	2	0.4	1	0				5.4	0.41	3.91	1.88	48.0818	1.66	42.4552	0.882979	0.37	4.836	127.51	1.81	12.16	5.16
1090	1	0					155	48	19.9792	2	60	3	0.6	2	0				6.42	1.63	4.96	1.19	23.9919	3.08	62.0968	2.58824	0.69	1.019	121.4	1.9	14.95	4.65
1091	10	0					176	63	20.3383	1	71	3	0.3	2	1	3	24	12.5	5.23	0.94	3.55	1.04	29.2958	2.22	62.5352	2.13462	0.29	2.405	146.92	1.59	13.43	4.14
1092	0.1	0					162	53	20.1951	2	34	1	0.5	1	0				4.67	0.75	3.32	1.48	44.5783	1.64	49.3976	1.10811	0.2	3.923	81.27	1.69	16.02	4.42
1093	5	0					155	67.5	28.0957	2	55	2	1.2	3	0				6.49	1.94	3.38	0.93	27.5148	1.72	50.8876	1.84946	0.73	2.442	67.8	1.31	10.17	4.79
1094	0.1	0					155	48	19.9792	2	50	2	0.5	1	1	1	4	25	4.39	1.49	4.69	1.48	31.5565	2.76	58.8486	1.86486	0.45	2.893	90.88	1.73	14.92	4.21
1095	3	0					168	74	26.2188	1	49	2	0.8	1	0				4.94	2.89	4.62	1.28	27.7056	2.14	46.3203	1.67188	1.2	0.792	133.86	1.45	13.5	4.13
1096	0.1	0					153	60.3	25.7593	2	27	1	1.2	1	0				4.81	0.53	3.16	1.61	50.9494	1.41	44.6203	0.875776	0.14	1.089	97.16	1.26	11.5	4.53
1097	5	0					180	67	20.679	1	34	1	0.5	1	0				4.85	2.21	4.14	0.74	17.8744	2.47	59.6618	3.33784	0.93	0.994	103.72	1.59	13.06	4.7
1098	0.02	0					162	62	23.6244	1	36	2	3	1	1	22	38	57.8947	5.09	1.09	4.53	1.13	24.9448	3.08	67.9912	2.72566	0.32	1.719	108.97	1.5	12.68	5.25
1099	0.1	0					156	65	26.7094	2	52	2	0.8	1	0				4.98	3.48	3.65	0.66	18.0822	1.88	51.5068	2.84848	1.11	1.29	104.08	1.65	12.58	4.98
1100	1	0					170	60	20.7612	1	50	2	0.5	1	0				5.58	1.25	4.7	1.12	23.8298	2.88	61.2766	2.57143	0.7	3.735	89.86	1.29	12.92	4.63
1101	0.02	0					159	75	29.6665	2	52	2	2.3	1	1	3	5	60	5.3	2.66	5.77	1.01	17.5043	3.47	60.1386	3.43564	1.29	1.379	89.98	1.67	12.58	4.87
1102	2	0					159	66	26.1066	2	41	2	1.5	3	1	8	9	88.8889	5.32	0.57	3.47	1.66	47.8386	1.67	48.1268	1.00602	0.14	0.658	96.24	1.72	12.82	4.36
1103	0.04	0					163	64	24.0882	1	64	3	0.8	3	1	7	32	21.875	4.8	1.9	4.21	0.9	21.3777	2.41	57.2447	2.67778	0.9	2.909	81.94	1.45	13.24	5.2
1104	0.1	0					176	91.5	29.539	1	41	2	0.9	1	1	1	2	50	6.24	3.1	4.01	0.89	22.1945	1.9	47.3815	2.13483	1.22	1.808	99.94	1.83	10.79	4.2
1105	0.5	0					150	61	27.1111	2	49	2	0.7	1	0				4.6	0.53	3.55	1.21	34.0845	2.01	56.6197	1.66116	0.33	0.611	136.35	1.39	13.02	5.43
1106	0.1	0					173	66	22.0522	1	31	1	2.3	2	0				4.67	1.19	4.23	0.97	22.9314	2.73	64.539	2.81443	0.53	1.03	101.2	1.55	14.48	4.44
1107	0.03	1		1			158	60	24.0346	2	59	3	1.2	4	0				4.5	1.22	4.2	1.77	42.1429	2.07	49.2857	1.16949	0.36	1.461	79.42	2.01	11.16	5
1108	0.05	0					152	59	25.5367	2	34	1	0.5	2	0				5.04	2.76	4.38	0.86	19.6347	2.47	56.3927	2.87209	1.05
1109	2	0					158	58	23.2335	2	26	1	0.4	2	1	4	12	33.3333	4.85	0.65	2.82	1.05	37.234	1.62	57.4468	1.54286	0.15	1.765	99.31	1.45	13.25	5.77
1110	0.1	0					154	53	22.3478	2	39	2	0.3	1	0				4.34	1.34	3.99	0.97	24.3108	2.5	62.6566	2.57732	0.52	1.005	90.72	1.79	14.61	5.41
1111	2	0					155	55	22.8928	2	39	2	0.7	3	0				4.68	0.79	4.05	1.17	28.8889	2.57	63.4568	2.19658	0.31	1.82	115.07	2.03	14.14	5.09
1112	1	0					166	45	16.3304	2	67	3	0.3	1	0				4.53	1.63	4.14	1.33	32.1256	1.99	48.0676	1.49624	0.82	0.779	120.21	1.48	12.3	4.45
1113	N	0					159	63	24.9199	2	57	3	0.7	3	0				4.65	1.24	5.68	1.18	20.7746	3.67	64.6127	3.11017	0.83	2.733	116.34	1.59	13.51	4.75
1114	5	0					160	65	25.3906	1	62	3	0.7	1	0				4.54	1.82	5.01	0.95	18.9621	3.18	63.4731	3.34737	0.88	2.235	79.66	1.71	11.5	4.66
1115	2	0					161	60	23.1473	2	32	1	0.3	2	1	1	15	6.66667	4.54	0.49	3.3	1.54	46.6667	1.54	46.6667	1	0.22	2.288	103.84	1.59	13.86	4.72
1116	N	0					175	78	25.4694	1	52	2	0.4	2	1	1	5	20	5.01	2.14	3.71	0.74	19.9461	2.33	62.8032	3.14865	0.64	1.115	90.5	1.67	11.58	4.86
1117	2	0					164	80	29.7442	2	59	3	2.1	1	0				5.34	1.18	4.67	1.3	27.8373	2.82	60.3854	2.16923	0.55	1.431	78.07	1.84	11.67	5.18
1118	0.04	0					150	57	25.3333	2	56	3	1.5	2	0				4.77	1.37	4.16	1.44	34.6154	1.99	47.8365	1.38194	0.73	1.416	112.78	1.74	11.03	3.42
1119	0.06	0					154	56	23.6128	2	58	3	0.7	1	0				4.51	1.98	5.53	1.35	24.4123	3.23	58.4087	2.39259	0.95	1.82	125.47	1.41	14.51	4.9
1120	2	0					162	68	25.9107	2	26	1	0.6	2	1	1	7	14.2857	4.68	0.82	3.81	1.22	32.021	2.22	58.2677	1.81967	0.37	1.93	103.04	1.84	12.59	4.51
1121	0.1	0					174	62	20.4783	1	32	1	0.8	1	0				4.77	0.65	4.19	1.54	36.7542	2.25	53.6993	1.46104	0.4	0.383	102.46	1.37	13.83	5.23
1122	1	1		1			168	55	19.487	2	53	2	0.3	2	0				5.09	0.73	4.55	1.45	31.8681	2.51	55.1648	1.73103	0.59	0.898	97.28	1.98	12.33	4.03
1123	1	0					155	54	22.4766	2	56	3	0.8	1	0				4.15	1.1	4.64	1.63	35.1293	2.52	54.3103	1.54601	0.49	0.584	78.86	1.33	13.59	3.81
1124	0.5	0					183	84	25.0829	1	31	1	1.6	2	1	1	2	50	5.68	0.69	3.14	1.19	37.8981	1.62	51.5924	1.36134	0.33	0.634	121.13	1.67	13.25	4.74
1125	10	1		1	1		165	68	24.977	1	51	2	0.3	2	1	1	6	16.6667	4.74	1.43	3.64	0.89	24.4505	2.12	58.2418	2.38202	0.63	0.866	89.05	1.28	11.86	4.66
1126	0.3	1		1			159	57.5	22.7444	2	58	3	0.7	1	0				5.32	2.38	3.93	0.88	22.3919	1.96	49.8728	2.22727	1.09	0.784	112.48	1.31	11.62	3.9
1127	3	0					183	83.5	24.9336	1	30	1	0.5	1	1	2	7	28.5714	5.24	1.44	4.75	1.01	21.2632	2.85	60	2.82178	0.89	1.382	94.49	1.72	15.94	4.29
1128	0.2	0					169	65	22.7583	1	34	1	1.8	5	1	30	40	75	4.39	2.09	3.39	0.93	27.4336	1.59	46.9027	1.70968	0.87	1.616	110.95	1.52	14.74	4.61
1129	0.04	0					169	63	22.0581	2	66	3	1	1	1	3	10	30	6.52	0.71	3.92	1	25.5102	2.69	68.6224	2.69	0.23	1.478	69.23	1.43	15.39	4.75
1130	0.05	0					170	85	29.4118	1	38	2	0.9	1	0				4.45	1.19	4.2	0.86	20.4762	2.68	63.8095	3.11628	0.66	1.337	131.66	1.66	13.84	4.57
1131	0.05	0					155	65	27.0552	2	58	3	0.8	2	0				4.59	2.73	3.87	0.92	23.7726	1.88	48.5788	2.04348	1.07	1.678	93.53	1.35	12.88	4.2
1132	0.03	1			1		167	60	21.5139	2	35	2	0.3	1	0				4.23	1.4	4.01	1.18	29.4264	2.26	56.3591	1.91525	0.57	1.484	94.69	1.61	13.36	5.32
1133	1	0					152	59	25.5367	2	47	2	1.2	2	0				5.27	0.85	3.96	1.26	31.8182	2.54	64.1414	2.01587	0.16	1.147	95.36	2.08	12.18	4.63
1134	0.1	0					152	49	21.2084	2	45	2	0.1	1	0				5.03	1.5	3.8	1.17	30.7895	2.07	54.4737	1.76923	0.56	2.126	101.63	1.49	14.05	5.22
1135	0.02	0					165	64	23.5078	2	51	2	0.4	2	0				5.22	0.9	4.35	1.17	26.8966	2.86	65.7471	2.44444	0.32	1.544	81.65	1.35	11.87	4.4
1136	0.1	0					172	63	21.2953	1	44	2	0.6	1	0				5.34	3.33	4.17	0.74	17.7458	2.2	52.7578	2.97297	1.23	0.993	90.81	1.63	14.26	3.84
1137	0.1	0					162	51	19.433	2	45	2	0.7	2	1	1	19	5.26316	4.75	1.18	3.34	1.23	36.8263	1.55	46.4072	1.26016	0.56	1.34	120.99	1.26	11.15	5.75
1138	6	0					165	65	23.8751	2	50	2	0.8	2	0				4.37	1.7	3.73	1.04	27.882	1.96	52.5469	1.88462	0.73	2.087	81.87	1.72	12.62	3.84
1139	0.3	0					168	81	28.699	2	44	2	2	2	0				5.56	1.55	4.97	0.8	16.0966	3.41	68.6117	4.2625	0.76	2.444	120.43	1.44	13.36	4.93
1140	0.06	0								2	28	1	1.5	1	1	2	4	50	4.8	0.71	3.81	1.37	35.958	2.09	54.8556	1.52555	0.35	1.817	106.49	1.76	15.2	5.09
1141	0.6	0					170	55	19.0311	1	35	2	0.5	3	1	10	42	23.8095	4.22	1.24	4.01	1.35	33.6658	2.18	54.3641	1.61481	0.48	0.918	103.99	1.71	13.59	4.3
1142	2	0					167	58	20.7967	2	50	2	1.2	3	0				4.5	1.53	3.29	1.05	31.9149	1.67	50.7599	1.59048	0.57	0.085	181.13	1.8	13.46	4.29
1143	0.2	0					168	60	21.2585	2	46	2	0.5	1	0				5.94	1	4.4	1.01	22.9545	2.88	65.4545	2.85149	0.51	1.896	93.13	1.96	13.71	4.42
1144	2	0					161	62	23.9188	2	47	2	0.3	1	0				4.8	1.22	4.38	1.53	34.9315	2.37	54.1096	1.54902	0.48	1.035	101.9	1.4	12.15	4.46
1145	0.2	0					171	77	26.3329	1	46	2	0.7	2	0				5.62	1.73	3.74	0.93	24.8663	2.16	57.754	2.32258	0.65	0.051	110.46	1.84	20.3	4.58
1146	0.4	0					173	85	28.4005	1	42	2	0.6	2	0				5.04	1.34	4.49	1.02	22.7171	2.84	63.2517	2.78431	0.63	1.351	101.94	1.7	13.88	5.27
1147	4	0					158	46.5	18.6268	2	40	2	0.3	1	0				4.65	0.77	4.3	1.55	36.0465	2.44	56.7442	1.57419	0.31	1.344	106.06	1.58	14.55	5.65
1148	0.1	0					152	60	25.9695	2	62	3	0.9	3	0				5.78	1.46	6.19	2.02	32.6333	3.53	57.0275	1.74752	0.64	0.888	106.7	1.51	11.98	3.97
1149	0.5	1	1	1			158	50	20.0288	2	51	2	0.7	2	1	1	8	12.5	4.67	0.83	5.23	2.1	40.153	2.69	51.434	1.28095	0.44	1.51	101.32	1.53	13.45	4.82
1150	0.05	0					170	110	38.0623	1	23	1	0.8	1	1	1	1	100	4.64	2.53	4.52	0.89	19.6903	2.8	61.9469	3.14607	0.83	1.22	111.22	1.49	12.86	4.29
1151	0.1	0					152	59	25.5367	2	45	2	0.8	1	0				5.09	2.4	5.56	1.24	22.3022	3.42	61.5108	2.75806	0.9	0.92	102.29	1.62	13.86	4.48
1152	2	0					158	54	21.6311	2	53	2	1	2	1	1	3	33.3333	4.74	1.26	4.45	1.29	28.9888	2.49	55.9551	1.93023	0.67	1.312	97.33	1.5	12.38	5.34
1153	0.8	0					174	80	26.4236	1	34	1	0.6	1	1	5	9	55.5556	5.26	1.95	3.94	0.93	23.6041	2.21	56.0914	2.37634	0.8	1.105	105.62	1.5	12.71	4.89
1154	0.3	0					158	52.5	21.0303	2	49	2	0.5	4	1	1	15	6.66667	4.46	1.03	4.5	1.72	38.2222	2.12	47.1111	1.23256	0.66	1.517	86.25	1.55	13.28	4.18
1155	2	0					165	48	17.6309	2	29	1	2.8	1	0				4.41	0.5	4.08	1.64	40.1961	1.99	48.7745	1.21341	0.45
1156	0.1	0					176	76	24.5351	1	52	2	1.5	2	1	4	12	33.3333	5.17	0.72	4.78	1.65	34.5188	2.57	53.7657	1.55758	0.56	0.797	131.82	1.52	11.95	3.75
1157	10	0					165	68	24.977	2	57	3	3	2	1	1	5	20	5.44	1.47	4.4	1.38	31.3636	2.43	55.2273	1.76087	0.59	0.462	83.16	1.62	12.34	4.29
1158	N	0					158	50	20.0288	2	45	2	0.5	1	0				5.05	0.56	3.69	1.57	42.5474	1.71	46.3415	1.08917	0.41	1.704	108	2.12	11.77	5.59
1159	2	0					171	75	25.6489	1	28	1	1.2	2	0				4.9	1.52	2.99	0.84	28.0936	1.41	47.1572	1.67857	0.74	3.918	122.62	1.58	13.31	4.08
1160	0.1	0								2	28	1	0.7	2	1	6	11	54.5455	4.47	0.99	4.07	1.44	35.3808	2.19	53.8084	1.52083	0.44	1.439	97.98	1.71	13.39	4.87
1161	0.02	0					155	56	23.3091	2	49	2	0.4	1	0				6.44	2.11	5.27	1.32	25.0474	3.12	59.203	2.36364	0.83	2.056	108.1	1.61	13.82	5.02
1162	0.1	0					160	55	21.4844	2	51	2	0.3	1	0				5.26	1.36	4.77	1.03	21.5933	3.06	64.1509	2.97087	0.68	1.682	98.62	2.45	13.49	4.86
1163	0.05	0					159	59	23.3377	2	57	3	1	2	0				5.82	1.09	4.66	1.03	22.103	3.06	65.6652	2.97087	0.57
1164	0.06	0					168	100	35.4308	1	35	2	0.3	2	1	1	3	33.3333	5.13	3.74	4.87	0.82	16.8378	2.73	56.0575	3.32927	1.32	1.711	94.65	1.61	14.62	4.71
1165	0.1	0					171	83	28.3848	1	33	1	1.1	1	0				5.99	5.14	6.47	0.78	12.0556	3.88	59.9691	4.97436	1.81	2.009	77.18	1.85	14.06	4.78
1166	0.3	0					157	56	22.719	2	50	2	0.5	1	0				4.4	1.83	4.2	0.85	20.2381	2.68	63.8095	3.15294	0.67	2.936	87.37	1.52	11.23	4.39
1167	0.05	0					186	82	23.7022	1	64	3	1.3	2	0				4.96	1.7	3.98	0.83	20.8543	2.34	58.794	2.81928	0.81	0.619	95.49	1.57	13.05	4.75
1168	0.2	0					160	98	38.2812	2	40	2	1	4	1	2	8	25	6.12	0.99	4.2	0.97	23.0952	2.81	66.9048	2.89691	0.42	1.01	115.09	1.59	13.25	4.44
1169	1	0					162	57.5	21.9098	2	32	1	0.9	1	1	4	6	66.6667	4.68	0.62	4.83	1.35	27.9503	3.11	64.3892	2.3037	0.37	1.132	86.86	1.73	13.82	5.37
1170	0.04	0					166	49	17.782	2	35	2	0.5	2	0				4.46	1.43	3.11	0.78	25.0804	1.74	55.9486	2.23077	0.59	2.625	142.71	1.04	11.66	3.82
1171	0.05	0					155	54	22.4766	2	54	2	0.4	3	0				6.24	2.76	4.99	0.9	18.0361	2.89	57.9158	3.21111	1.2	2.151	105.13	1.64	14.86	4.64
1172	0.1	0					160	60	23.4375	2	51	2	0.4	3	1	1	17	5.88235	4.74	0.83	5	1.48	29.6	3.03	60.6	2.0473	0.49	1.986	112.56	1.17	11.81	3.46
1173	2	0					152	46	19.91	2	57	3	0.7	1	0				4.64	1	3.94	1.72	43.6548	1.84	46.7005	1.06977	0.38	1.93	92.63	1.35	13.96	4.23
1174	2	0					163	54	20.3244	2	46	2	0.8	1	0				5.36	0.94	4.98	1.2	24.0964	3.19	64.0562	2.65833	0.59	1.779	116.22	1.48	14.08	4.79
1175	3	0					175	49	16	1	27	1	0.7	2	0				5.74	1.05	4.72	1.49	31.5678	2.73	57.839	1.83221	0.5	0.632	112.62	1.29	12.84	3.44
1176	1	0					155	42.5	17.6899	2	49	2	0.3	3	0				4.42	0.51	3.94	1.9	48.2234	1.73	43.9086	0.910526	0.31	1.219	127.64	1.6	13.31	4.21
1177	0.3	0					155	47.5	19.7711	2	39	2	0.7	1	0				5.83	1.73	8.05	2.21	27.4534	4.82	59.8758	2.181	1.02	2.044	109.03	1.4	14.97	4.14
1178	0.9	0					165	65	23.8751	2	56	3	0.6	1	0				4.88	1.61	5	1.45	29	3.03	60.6	2.08966	0.52	1.279	118	1.85	12.46	5.28
1179	0.1	0					153	51	21.7865	2	45	2	0.8	1	0				4.68	1.13	5.82	2.02	34.7079	3.43	58.9347	1.69802	0.37	1.301	110.32	1.84	12.18	4.43
1180	1	0					160	60	23.4375	2	49	2	0.9	2	0				5.57	0.88	4.35	1.55	35.6322	2.57	59.0805	1.65806	0.23	1.148	114.94	1.79	11.88	4.5
1181	0.03	0					158	53	21.2306	2	56	3	0.2	1	0				4.88	1	3.97	1.18	29.7229	2.42	60.9572	2.05085	0.37	1.331	79.39	1.71	14.2	4.78
1182	1	0					180	70	21.6049	1	38	2	0.7	1	1	2	4	50	4.96	0.89	3.78	1.15	30.4233	2.24	59.2593	1.94783	0.39	1.25	109.4	1.7	11.85	5.11
1183	0.1	0					165	68	24.977	2	41	2	0.6	1	0				4.08	0.69	3.92	1.27	32.398	2.38	60.7143	1.87402	0.27	2.31	98.72	1.49	13.37	5.09
1184	1	1		1			156	64.5	26.5039	2	64	3	1.2	1	1	1	2	50	5.47	2.36	4.78	0.95	19.8745	2.8	58.5774	2.94737	1.03
1185	0.6	0					179	76	23.7196	1	63	3	0.9	5	1	17	55	30.9091	5.69	1.59	4.04	1.21	29.9505	2.23	55.198	1.84298	0.6	0.428	91.94	1.87	12.88	5.34
1186	0.1	0					158	56	22.4323	2	71	3	3.5	1	1	2	3	66.6667	5.13	3.29	6.9	1.28	18.5507	4.32	62.6087	3.375	1.3	2.126	136.15	1.73	13.01	4.61
1187	0.05	1		1			155	59	24.5578	2	53	2	1.3	1	0				4.55	2.33	3.55	1.13	31.831	1.73	48.7324	1.53097	0.69	1.672	112.86	1.77	15.06	5.55
1188	0.3	0					160	67	26.1719	2	51	2	0.7	1	1	1	4	25	5.55	3.48	4.84	1.22	25.2066	2.65	54.7521	2.17213	0.97	1.123	90.52	1.27	11.99	4.73
1189	N	0					178	68.5	21.6197	2	53	2	1.1	2	0				4.82	2.36	3.11	0.7	22.508	1.26	40.5145	1.8	1.15	4.692	105.15	1.4	11.52	4.4
1190	2	0					158	55	22.0317	2	56	3	0.4	1	1	1	4	25	4.52	0.89	5.03	1.78	35.3877	2.67	53.0815	1.5	0.58	0.938	98.47	1.38	11.44	4.49
1191	2	0					171	80	27.3588	1	30	1	0.9	1	1	4	4	100	5.5	2.09	4.47	0.94	21.0291	2.56	57.2707	2.7234	0.97	3.329	105.46	1.72	14.59	5.57
1192	0.02	0					173	80	26.7299	1	39	2	2.5	3	1	1	7	14.2857	4.46	0.78	3.27	0.95	29.052	2.02	61.7737	2.12632	0.3	2.09	105.16	1.72	13.79	4.5
1193	4	0					178	90	28.4055	1	36	2	2.2	3	1	3	10	30	5.4	1.74	4.66	0.96	20.6009	2.74	58.7983	2.85417	0.96	2.435	97.36	1.6	12.87	4.8
1194	1	0					172	75	25.3515	1	50	2	0.7	2	1	4	7	57.1429	4.67	0.87	4.17	1.41	33.8129	2.21	52.9976	1.56738	0.55	0.92	75.4	1.46	12.68	4.55
1195	1	0					161	55	21.2183	2	38	2	1.1	2	1	3	4	75	3.98	0.32	4.18	1.59	38.0383	2.22	53.11	1.39623	0.37	0.797	94.61	1.88	13.88	5.49
1196	6	0					162	60	22.8624	2	29	1	0.6	1	0				5.05	1.12	4.97	1.38	27.7666	3	60.3622	2.17391	0.59	5.577	118.41	1.4	12.1	4.49
1197	1	0					160	50	19.5312	2	48	2	1.2	1	0				6.4	2.26	5.79	1.65	28.4974	3.29	56.8221	1.99394	0.85	1.865	81.55	1.64	12.76	4.67
1198	0.1	0					170	75	25.9516	1	74	3	0.8	2	1	2	3	66.6667	6.96	1.62	3.88	1.04	26.8041	2.13	54.8969	2.04808	0.71	1.604	112.81	1.67	11.39	5.22
1199	1	0					156	60	24.6548	2	39	2	0.6	2	1	1	7	14.2857	6.47	1.16	3.62	1.27	35.0829	1.75	48.3425	1.37795	0.6	1.047	80.11	1.67	14.87	4.6
1200	0.1	0					173	60	20.0474	1	75	3	0.8	1	0				5.26	0.88	5.55	1.71	30.8108	3.2	57.6577	1.87135	0.64	0.037	101.25	1.65	13.56	4.39
1201	0.06	0					171	85	29.0688	1	28	1	0.9	1	1	1	2	50	4.42	1.12	3.59	1.02	28.4123	2.05	57.1031	2.0098	0.52	1.249	84.57	1.6	15.19	4.79
1202	0.05	0					171	71	24.281	2	53	2	0.3	2	0				5.37	1.83	5	1.07	21.4	3.14	62.8	2.93458	0.79	0.626	102.85	1.45	13.07	5
1203	0.02	0					153	60	25.6312	2	55	2	1.1	1	0				4.61	1.88	4.51	1.33	29.49	2.38	52.7716	1.78947	0.8	0.485	110.16	1.69	13.44	5.26
1204	N	0					161	57.5	22.1828	2	40	2	0.7	1	0				5.89	0.78	5.16	2	38.7597	2.8	54.2636	1.4	0.36	0.847	91.49	1.7	14.62	4.78
1205	N	0					161	50	19.2894	2	37	2	0.8	1	1	2	7	28.5714	4.44	0.84	3.39	2.13	62.8319	0.98	28.9086	0.460094	0.28	1.094	134.81	1.53	13.75	4.86
1206	0.1	0					173	78	26.0617	1	35	2	1.8	2	1	6	6	100	4.98	2.45	4.41	0.9	20.4082	2.67	60.5442	2.96667	0.84	1.567	112.66	1.59	16.52	4.22
1207	0.1	0					160	60	23.4375	2	44	2	0.5	1	1	2	2	100	4.72	1.14	4.16	1.79	43.0288	2.02	48.5577	1.12849	0.35	1.725	124.02	1.83	12.15	4.86
1208	0.1	0					174	80	26.4236	1	52	2	1.3	1	1	4	4	100	4.71	0.99	5.05	1.06	20.9901	3.45	68.3168	3.25472	0.54	1.729	116.5	1.88	14	5.28
1209	0.2	1		1			158	75	30.0433	2	43	2	0.8	3	1	1	21	4.7619	4.23	2.25	4.5	1.06	23.5556	2.54	56.4444	2.39623	0.9	0.988	100.62	1.53	14.65	4.4
1210	15	1			1		158	60	24.0346	2	55	2	0.3	1	0				4.68	1.22	4	1.22	30.5	2.18	54.5	1.78689	0.6	3.716	105.74	1.54	13.33	4.16
1211	0.1	0					175	71	23.1837	1	40	2	0.3	1	0				5.11	0.9	6.18	0.96	15.534	4.5	72.8155	4.6875	0.72	2.376	123.17	1.85	14.63	5.44
1212	0.8	0					154	52	21.9261	2	29	1	0.6	3	0				4.51	1.07	3.33	1.34	40.2402	1.52	45.6456	1.13433	0.47	2.924	94.64	1.88	15.78	4.92
1213	0.2	0								2	53	2	0.6	1	0				4.95	0.44	3.01	1.25	41.5282	1.54	51.1628	1.232	0.22	1.222	80.5	1.71	13.36	5.22
1214	0.7	0					185	83	24.2513	1	27	1	0.5	1	1	1	5	20	4.78	1	4.55	1.07	23.5165	2.9	63.7363	2.71028	0.58	1.967	90.93	1.51	14.37	4.57
1215	0.7	0					180	81	25	1	26	1	0.7	1	1	2	3	66.6667	3.66	1.31	3.2	0.79	24.6875	1.73	54.0625	2.18987	0.68	3.09	120.44	1.39	14.86	4.8
1216	0.1	0					162	62.5	23.815	2	58	3	1	1	1	1	6	16.6667	5.2	0.99	4.64	1.43	30.819	2.65	57.1121	1.85315	0.56	1.423	89.78	1.76	13.28	3.54
1217	1	0					157	74	30.0215	2	61	3	0.6	2	0				4.69	2.09	6.39	1.73	27.0736	3.47	54.3036	2.00578	1.19	0.667	138.71	1.47	16.48	4.51
1218	0.03	0					158	61	24.4352	2	52	2	0.2	1	0				5.13	0.71	3.68	1.17	31.7935	1.96	53.2609	1.67521	0.55	1.188	107.47	1.52	13.35	4.79
1219	0.02	0					153	60	25.6312	2	54	2	0.6	3	0				6.8	0.73	5.15	2.43	47.1845	2.51	48.7379	1.03292	0.21	1.684	105.66	1.52	12.89	4.46
1220	0.02	0					160	51	19.9219	2	45	2	3.8	3	1	2	7	28.5714	5.01	1.31	5.56	1.18	21.223	3.65	65.6475	3.09322	0.73	1.72	82.89	1.54	12.17	4.14
1221	0.8	0					170	68	23.5294	2	29	1	0.6	1	0				4.84	0.6	2.9	1.09	37.5862	1.45	50	1.33028	0.36	1.457	94.69	1.41	13.75	4.04
1222	0.5	0					161	55	21.2183	2	55	2	0.7	3	0				5.29	0.9	3.41	1.22	35.7771	1.7	49.8534	1.39344	0.49	2.217	100.3	1.32	12.16	4.25
1223	0.7	0					169	82	28.7105	1	33	1	0.9	2	1	5	19	26.3158	5.21	2.11	4.13	0.79	19.1283	2.55	61.7433	3.22785	0.79	2.364	134.75	1.54	13.55	4.64
1224	0.1	0					156	50	20.5457	2	52	2	0.5	1	0				5.15	0.96	4.2	1.19	28.3333	2.43	57.8571	2.04202	0.58	1.417	100.4	1.39	11.99	4.46
1225	N	0					166	65	23.5883	2	64	3	0.3	1	0				6.77	0.81	5.59	1.38	24.6869	2.93	52.415	2.12319	1.28	2.147	108.48	1.87	15.85	4.35
1226	0.05	0					166	67.5	24.4956	2	32	1	2.5	1	1	2	3	66.6667	4.95	0.9	4.38	1.56	35.6164	2.29	52.2831	1.46795	0.53	1.21	106.72	1.41	11.96	4.13
1227	1	0					157	55	22.3133	2	55	2	0.3	2	0				4.8	0.84	4.49	1.41	31.4031	2.53	56.3474	1.79433	0.55	0.62	102.64	1.79	13.71	4.72
1228	0.1	0					160	58.5	22.8516	2	22	1	0.3	2	0				3.95	0.63	4.32	1.56	36.1111	2.51	58.1019	1.60897	0.25	1.861	117.59	1.71	13.19	4.56
1229	0.5	0					158	60	24.0346	2	32	1	0.8	3	0				4.36	1.56	5.11	1.33	26.0274	3.3	64.5793	2.4812	0.48	1.703	89.59	1.59	13.45	4.33
1230	0.03	0					160	51.5	20.1172	2	37	2	1.7	2	0				4.43	1.08	3.76	1.72	45.7447	1.62	43.0851	0.94186	0.42	3.441	99.86	1.47	14.21	4.63
1231	0.02	0					160	59	23.0469	2	57	3	0.7	3	1	1	7	14.2857	4.98	1.43	4.3	0.91	21.1628	2.69	62.5581	2.95604	0.7	3.485	124.35	1.65	11.52	3.83
1232	3	0					170	59	20.4152	2	38	2	0.8	1	0				4.96	1.46	4.8	1.22	25.4167	3.01	62.7083	2.46721	0.57	2.032	119.48	1.27	13.88	5.22
1233	2	0					158	54	21.6311	2	52	2	0.3	1	0				5.71	0.99	3.95	1.1	27.8481	2.47	62.5316	2.24545	0.38	1.179	108.63	1.92	14.49	3.84
1234	0.06	0					159	60.5	23.931	2	47	2	0.3	1	0				5.19	1.5	3.92	1.12	28.5714	2.17	55.3571	1.9375	0.63	0.548	102.68	1.73	14.25	5.36
1235	1	0					156	42	17.2584	2	25	1	0.9	1	0				4.54	0.88	3.82	1.51	39.5288	1.9	49.7382	1.25828	0.41	1.129	98.9	1.44	12.35	4.65
1236	0.04	0					152	57	24.6711	2	43	2	0.5	1	0				4.55	1.01	3.15	0.81	25.7143	1.96	62.2222	2.41975	0.38	1.053	129.99	1.55	14.41	4.74
1237	0.04	0					156	52	21.3675	2	23	1	2.2	1	1	19	48	39.5833	4.46	0.76	4.03	1.46	36.2283	2.19	54.3424	1.5	0.38	5.312	116.45	1.37	13.29	4.96
1238	0.25	0					172	80	27.0416	1	35	2	0.8	1	1	1	5	20	4.28	1.16	5.6	0.95	16.9643	3.76	67.1429	3.95789	0.89	2.216	81.38	1.87	12.27	4.51
1239	0.2	0					169	65	22.7583	1	34	1	1.8	5	1	38	64	59.375	4.32	1.97	4.7	1.17	24.8936	2.73	58.0851	2.33333	0.8	33.503	102.26	1.44	12.58	4.01
1240	0.1	1		1			162	62	23.6244	2	51	2	1.5	2	0				5.83	1.33	4.64	1.12	24.1379	2.89	62.2845	2.58036	0.63	0.81	141.11	1.36	12.79	4.54
1241	1	0					150	66	29.3333	2	46	2	0.6	1	0				5.31	1.38	6.02	1.13	18.7708	4.11	68.2724	3.63717	0.78	1.101	103.64	1.44	13.06	5.51
1242	0.2	0					161	62	23.9188	2	34	1	0.3	2	0				4.97	0.92	3.69	1.03	27.9133	2.1	56.9106	2.03883	0.56	1.323	91.71	1.64	14.71	4.47
1243	0.1	0					159	49	19.3821	2	37	2	1.6	2	1	3	34	8.82353	4.28	0.8	3.7	1.28	34.5946	1.96	52.973	1.53125	0.46	2.401	115.08	1.79	12.6	4.5
1244	2	0					160	58	22.6562	1	58	3	1.6	3	1	1	1	100	5.53	1.37	4.32	0.95	21.9907	2.71	62.7315	2.85263	0.66	1.69	77.23	1.78	13.42	5.05
1245	N	0					160	64	25	2	64	3	0.4	1	0				4.33	1.7	3.72	1.12	30.1075	1.95	52.4194	1.74107	0.65	2.184	90.57	1.55	13.64	4.79
1246	2	0					158	64	25.6369	2	58	3	0.6	1	0				4.7	1.72	4.92	1.23	25	3.11	63.2114	2.52846	0.58	2.966	119.39	1.59	12.57	4.16
1247	1	0					150	60	26.6667	2	61	3	0.5	3	0				5.74	1.39	5.39	1.22	22.6345	3.54	65.6772	2.90164	0.63	2.507	105.49	1.54	12.48	4.03
1248	0.1	0					162	67.5	25.7202	2	52	2	1	1	1	3	5	60	4.55	2.02	3.77	0.85	22.5464	2.02	53.5809	2.37647	0.9	2.197	96.13	1.56	10.86	5.09
1249	2	0					164.5	48	17.7382	2	26	1	1.3	1	1	2	14	14.2857	4.57	0.86	3.53	1.71	48.4419	1.61	45.6091	0.94152	0.21	4.498	96.17	1.25	14.05	4.64
1250	0.1	0					160	56.5	22.0703	2	57	3	0.8	1	1	1	4	25	5.55	1.26	4.97	0.9	18.1087	3.27	65.7948	3.63333	0.8	0.946	115.46	1.35	13.52	4.8
1251	4	1		1			167	75	26.8923	1	48	2	0.3	1	1	1	2	50	5.64	6.5	6.38	0.89	13.9498	2.87	44.9843	3.22472	2.62	0.602	98.28	1.93	13.18	4.83
1252	0.04	0					156	56	23.0112	2	53	2	0.5	1	0				4.97	1.43	4.85	1.54	31.7526	2.58	53.1959	1.67532	0.73	1.109	134.25	1.63	12.66	4.74
1253	0.1	0					162	57	21.7193	2	26	1	0.5	1	0				5.24	0.64	4.25	1.44	33.8824	2.37	55.7647	1.64583	0.44	0.83	91.49	1.55	15.09	4.74
1254	0.7	0					160	55	21.4844	1	65	3	0.5	1	0				4.29	0.66	3.66	0.91	24.8634	2.37	64.7541	2.6044	0.38	1.171	106.14	1.61	13.55	4.59
1255	4	1	1				167	80	28.6851	2	70	3	1	1	0				4.99	1.6	4.48	1.1	24.5536	2.5	55.8036	2.27273	0.88	1.293	104.84	1.58	12.68	4.3
1256	0.02	0					156	45	18.4911	2	53	2	0.6	2	1	3	4	75	5	0.64	3.54	1.88	53.1073	1.36	38.4181	0.723404	0.3	1.551	94.87	1.84	12.05	4.77
1257	3	0					155	46	19.1467	2	51	2	0.5	1	1	1	1	100	4.76	1.47	5.47	1.19	21.755	3.33	60.8775	2.79832	0.95	2.33	105.53	1.19	13.45	5.09
1258	0.1	0					171	85	29.0688	1	34	1	0.4	2	0				4.58	1.28	4.05	0.76	18.7654	2.55	62.963	3.35526	0.74	0.709	131.32	1.7	11.92	5.11
1259	0.05	0					160	53	20.7031	2	44	2	0.5	1	1	2	4	50	5.02	1.54	4.39	1.02	23.2346	2.56	58.3144	2.5098	0.81	2.349	66.44	1.56	13.23	4.61
1260	0.1	0					170	62.5	21.6263	1	62	3	0.4	1	1	2	2	100	5.82	1.31	4.66	0.87	18.6695	3.01	64.5923	3.45977	0.78	1.288	95.7	1.54	12	4.1
1261	10	0					156	50	20.5457	2	56	3	0.5	1	0				5.41	0.82	5.61	1.34	23.8859	3.6	64.1711	2.68657	0.67	3.538	84.14	1.4	11.98	4.32
1262	1	0					162	52	19.8141	2	29	1	0.8	1	0				4.65	2	3.57	1.4	39.2157	1.47	41.1765	1.05	0.7
1263	0.1	0					160	65	25.3906	2	39	2	1.2	8	1	15	35	42.8571	4.87	1.57	5.12	2.17	42.3828	2.29	44.7266	1.0553	0.66	2.66	115.03	1.59	12.7	4.42
1264	6	0					163	59	22.2063	2	52	2	1.5	5	0				5.19	4.9	6.11	0.99	16.2029	2.62	42.8805	2.64646	2.5	0.574	113.59	1.57	12.66	3.71
1265	0.35	0					165	71	26.079	2	47	2	0.3	1	1	2	3	66.6667	4.41	1.11	5.79	1.12	19.3437	3.82	65.9758	3.41071	0.85	1.541	114.6	1.64	12.91	5.04
1266	0.5	0					163	60	22.5827	2	58	3	0.7	1	0				4.44	2.36	5.35	1.49	27.8505	2.9	54.2056	1.94631	0.96	0.454	127.79	1.81	14.93	5.52
1267	N	0					176	77	24.858	1	33	1	0.5	1	0				5.04	0.96	5	0.94	18.8	3.47	69.4	3.69149	0.59	1.968	141	1.43	13.34	5.25
1268	0.1	0					162	62	23.6244	2	35	2	2.3	3	1	4	11	36.3636	4.39	0.82	3.04	1.02	33.5526	1.66	54.6053	1.62745	0.36	1.689	98.28	1.63	12.51	4.85
1269	2	0					158	55	22.0317	2	39	2	0.8	1	0				4.77	0.82	3.35	0.97	28.9552	2.03	60.597	2.09278	0.35	1.791	110.13	1.89	14.12	5.03
1270	1	1		1	1	1	174	78	25.763	1	26	1	0.9	1	1	3	12	25	4.71	1.05	3.28	0.9	27.439	1.92	58.5366	2.13333	0.46	0.762	108.87	1.59	16.14	4.96
1271	1	0					160	62.5	24.4141	2	36	2	2.5	2	0				5.04	0.98	3.81	1.35	35.4331	2.12	55.643	1.57037	0.34	2.375	102.75	1.72	12.7	5.49
1272	0.2	0					160	52	20.3125	2	30	1	0.5	1	0				4.9	1	5.66	1.17	20.6714	3.94	69.6113	3.36752	0.55	2.391	105.74	1.91	14.01	5.08
1273	0.1	0					147	40	18.5108	2	43	2	0.2	1	0				5.01	0.97	4.12	1.23	29.8544	2.51	60.9223	2.04065	0.38	2.04	102.08	1.88	12.47	5.22
1274	0.1	0					163	60.5	22.7709	2	62	3	1	3	1	2	15	13.3333	5.08	0.83	3.63	1.15	31.6804	1.98	54.5455	1.72174	0.5	0.808	64.52	1.73	14.99	5.61
1275	0.4	0					156	58	23.833	2	42	2	1	3	0				5.03	2.34	3.69	1.02	27.6423	1.87	50.6775	1.83333	0.8	1.233	98.02	1.25	11.23	3.93
1276	2	0					162	49	18.6709	2	47	2	1	3	1	2	7	28.5714	5.75	1.26	2.91	0.89	30.5842	1.54	52.921	1.73034	0.48	0.465	98.02	1.67	13.34	4.98
1277	0.7	0					160	64	25	2	28	1	0.5	1	1	1	4	25	5.52	1.94	4	1.05	26.25	2.1	52.5	2	0.85	2.498	122.74	1.53	13.81	4.8
1278	0.2	0					170	77	26.6436	2	52	2	0.9	2	1	2	10	20	4.48	1.54	4.48	1.11	24.7768	2.6	58.0357	2.34234	0.77	2.482	134.48	1.7	13.07	4.99
1279	0.1	1	1				164	52	19.3337	2	35	2	0.6	1	1	1	5	20	5.04	0.6	3.21	1.16	36.1371	1.72	53.5826	1.48276	0.33	1.691	102.75	1.61	13.11	4.3
1280	0.04	0					158	45	18.026	2	18	1	1.6	1	1	6	6	100	5.1	1.52	4.79	1.4	29.2276	2.89	60.334	2.06429	0.5	2.005	121.1	1.73	16.62	4.96
1281	0.04	0					175	65	21.2245	1	25	1	1.1	1	1	7	8	87.5	4.3	2.3	5.52	1.14	20.6522	3.27	59.2391	2.86842	1.11	2.56	129.25	1.44	14.83	4.39
1282	1	0					172	77	26.0276	1	36	2	0.8	2	0				4.59	1.36	4.03	0.88	21.8362	2.61	64.7643	2.96591	0.54	1.308	99.58	1.38	13.47	4.18
1283	N	0					153	50	21.3593	2	51	2	0.6	2	0				4.62	1.07	5.82	1.43	24.5704	3.73	64.0893	2.60839	0.66	1.943	90.76	1.81	15.9	4.86
1284	0.1	0					162	55	20.9572	2	44	2	0.6	1	1	1	13	7.69231	4.75	0.97	4.68	1.62	34.6154	2.78	59.4017	1.71605	0.28	1.647	136.79	1.83	14.26	4.75
1285	3	0					157	53	21.5019	2	38	2	0.5	2	1	6	6	100	4.66	0.55	5.6	1.36	24.2857	4.04	72.1429	2.97059	0.2	0.654	107.4	1.6	14.25	4.61
1286	0.06	0					164	57	21.1927	2	45	2	2	2	0				5.07	0.88	4.17	1.12	26.8585	2.63	63.0695	2.34821	0.42	0.548	125.4	1.68	13.94	5.28
1287	1	0					152	45	19.4771	2	36	2	2.2	1	1	1	6	16.6667	4.49	0.58	3.2	1.22	38.125	1.78	55.625	1.45902	0.2	3.403	112.85	1.42	14.14	4.3
1288	16	0					163	73	27.4756	2	72	3	0.7	2	0				5.11	1.91	4.72	1.17	24.7881	3.08	65.2542	2.63248	0.47	2.54	106.62	1.71	15.51	4.9
1289	0.03	0					150	45.5	20.2222	2	43	2	1.5	1	0				3.92	2.7	4.86	1.04	21.3992	3.05	62.7572	2.93269	0.77	1.212	93.9	1.64	15.27	4.75
1290	0.02	0					172	59	19.9432	1	44	2	0.7	1	0				4.96	0.89	4.43	1.11	25.0564	2.84	64.1084	2.55856	0.48	1.484	75.89	1.78	14.44	5.39
1291	0.1	0					174	75	24.7721	1	62	3	1.7	3	1	15	49	30.6122	4.73	2.29	3.16	0.76	24.0506	1.57	49.6835	2.06579	0.83	1.873	77.56	1.37	13.99	4.07
1292	5	1		1			150	44	19.5556	2	52	2	0.5	2	1	3	5	60	4.6	0.99	4.87	1.6	32.8542	2.93	60.1643	1.83125	0.34	1.541	125.47	1.66	16.04	5.13
1293	10	0					161	55	21.2183	2	60	3	0.5	2	0				4.96	1.01	3.81	1.37	35.958	2.12	55.643	1.54745	0.32	1.077	88.81	1.92	12.47	5.36
1294	0.02	0					175	67.5	22.0408	1	51	2	1.2	5	1	10	42	23.8095	4.32	1.51	4.34	1.02	23.5023	2.71	62.4424	2.65686	0.61	0.494	125.59	1.66	11.12	5.24
1295	6	1		1			169	68	23.8087	1	29	1	1.1	3	0				4.15	1.35	3.36	0.94	27.9762	1.95	58.0357	2.07447	0.47	1.888	121.98	1.88	16.08	5.31
1296	N	0								2	48	2	0.2	1	0				4.94	0.92	4.91	1.77	36.0489	2.96	60.2851	1.67232	0.18	1.018	91.24	1.65	14.08	4.71
1297	5	0					164	65	24.1672	2	56	3	0.5	1	0				5.04	1.3	4.68	1.23	26.2821	2.95	63.0342	2.39837	0.5	0.85	114.13	1.35	14.1	4.26
1298	10	0					165	56	20.5693	2	57	3	0.8	1	0				5.16	0.85	3.9	1.5	38.4615	1.96	50.2564	1.30667	0.44	1.043	82.57	1.76	14.06	5.03
1299	1	0					173	71.5	23.8899	1	57	3	2.1	1	0				4.66	1.89	5.08	0.74	14.5669	3.36	66.1417	4.54054	0.98	0.585	92.01	1.72	14.72	5.02
1300	4	0					168	61	21.6128	2	53	2	1	2	0				4.89	0.62	3.89	1.36	34.9614	2.32	59.6401	1.70588	0.21	1.929	108.26	1.39	13.35	4.18
1301	0.04	0					173	66	22.0522	2	26	1	1.2	1	1	4	6	66.6667	4.44	0.97	4.25	1.37	32.2353	2.35	55.2941	1.71533	0.53	1.247	122.78	0.61	14.85	2.01
1302	0.02	0					163	52	19.5717	2	36	2	0.4	1	0				4.81	0.61	4.51	1.33	29.49	2.83	62.7494	2.12782	0.35	1.944	131.99	1.42	11.5	4.26
1303	0.9	0					176	82.5	26.6335	1	63	3	1.2	2	0				5.88	1.96	3.58	1.3	36.3128	1.67	46.648	1.28462	0.61	0.751	82.36	1.66	13.84	5.21
1304	0.1	1		1			169	65	22.7583	2	33	1	0.9	1	0				5.16	0.76	4.27	1.18	27.6347	2.71	63.466	2.29661	0.38	0.879	89.11	1.47	13.92	4.26
1305	0.1	0					158	56.8	22.7528	2	48	2	0.9	1	0				5.27	2.09	3.8	0.96	25.2632	2.08	54.7368	2.16667	0.76	1.017	97.74	2.08	15.08	5.25
1306	0.02	0					158	45	18.026	2	42	2	0.5	1	0				4.39	1.34	4.15	1.38	33.253	2.26	54.4578	1.63768	0.51	0.843	115.75	1.64	16.43	5.16
1307	2	0					160	57	22.2656	2	65	3	0.4	1	0				5.25	2.16	5.38	1.24	23.0483	3.22	59.8513	2.59677	0.92	0.881	96.64	1.3	13.73	4.29
1308	0.2	0					156	52	21.3675	1	62	3	0.6	1	0				4.97	2.41	4.65	1.07	23.0108	2.76	59.3548	2.57944	0.82	4.637	111.44	1.4	13.7	4.7
1309	2	0					165	58	21.3039	2	36	2	0.8	1	0				4.23	0.46	3.39	1.43	42.1829	1.73	51.0324	1.20979	0.23	1.614	96.14	1.42	14.06	4.36
1310	10	1		1			158	48	19.2277	2	43	2	0.4	1	0				4.98	0.68	3.37	1.59	47.181	1.58	46.8843	0.993711	0.2	0.83	97.69	1.51	13.6	4.09
1311	0.1	0					175	65	21.2245	1	26	1	1.3	1	1	1	6	16.6667	4.55	1.32	3.5	1.29	36.8571	1.79	51.1429	1.3876	0.42	1.821	98.56	1.54	12.97	5.09
1312	0.9	0					155	46	19.1467	2	30	1	1.2	2	0				4.89	0.99	4.44	1.4	31.5315	2.58	58.1081	1.84286	0.46	5.774	93.23	1.66	12.68	4.64
1313	N	0					158	53	21.2306	2	36	2	0.5	1	1	2	8	25	4.42	0.95	4.62	1.03	22.2944	3	64.9351	2.91262	0.59	0.371	103.19	1.36	13.93	4.38
1314	0.05	0					175	75	24.4898	1	34	1	0.8	1	1	1	29	3.44828	5.15	1.36	4.55	1.02	22.4176	2.92	64.1758	2.86275	0.61	1.208	82.21	1.82	14.52	5.24
1315	0.06	0					152	47	20.3428	2	51	2	0.5	2	0				4.09	0.72	3.63	1.26	34.7107	2.07	57.0248	1.64286	0.3	1.142	104.95	1.41	14	4.23
1316	0.1	0					156	50	20.5457	2	56	3	0.8	1	0				4.65	1.58	4.58	1.21	26.4192	2.74	59.8253	2.26446	0.63	1.443	102.43	1.73	13.59	4.16
1317	3	0					158	63	25.2363	2	59	3	0.3	1	0				5.04	1.03	4.95	1.32	26.6667	3.2	64.6465	2.42424	0.43	1.215	98.46	1.47	11.48	4.34
1318	0.02	0					175	70	22.8571	1	33	1	1.6	1	0				4.88	0.68	5.26	1.12	21.2928	3.72	70.7224	3.32143	0.42	1.228	126.33	1.62	15.19	4.62
1319	0.5	0					183	100	29.8606	1	37	2	1.2	1	1	2	3	66.6667	4.99	1.38	4.63	0.9	19.4384	3.17	68.4665	3.52222	0.56	0.772	104.25	1.68	13.62	5.52
1320	0.05	1			1		158	55	22.0317	2	44	2	0.4	1	0				4.76	0.79	3.77	1.17	31.0345	2.37	62.8647	2.02564	0.23	0.946	118.74	1.49	14.28	4.72
1321	4	0					155	60	24.974	2	36	2	3.5	1	1	2	30	6.66667	4.72	1.44	2.76	0.81	29.3478	1.4	50.7246	1.7284	0.55	2.537	113.44	1.6	12.22	4.81
1322	2	0					160	46	17.9688	2	48	2	0.5	1	0				4.46	1.19	4.52	1.26	27.8761	2.76	61.0619	2.19048	0.5	0.704	105.46	1.81	17.31	4.82
1323	0.5	0					160	55	21.4844	2	33	1	1.2	2	1	1	11	9.09091	5.11	0.9	3.14	1.31	41.7197	1.57	50	1.19847	0.26	0.516	81.2	2.03	12.65	5.33
1324	0.25	0					153	51	21.7865	2	65	3	1.2	1	1	1	5	20	4.91	1.64	6.18	1.64	26.5372	3.67	59.3851	2.2378	0.87	1.108	102.8	1.59	11.58	4.66
1325	5	0					170	85	29.4118	1	57	3	0.5	1	1	2	5	40	4.35	1.32	4.09	0.89	21.7604	2.67	65.2812	3	0.53	1.995	82.56	1.7	11.37	4.47
1326	0.1	0					157	56	22.719	2	37	2	0.6	1	0				4.95	1.93	3.88	1.03	26.5464	2.18	56.1856	2.1165	0.67	1.074	103.74	2.68	12.54	7.89
1327	2	0					157	60.5	24.5446	2	31	1	0.8	1	0				5.3	1.69	5.1	1.14	22.3529	3.17	62.1569	2.7807	0.79	1.366	98.89	1.32	12.2	4.16
1328	N	0					174	96	31.7083	1	45	2	0.4	1	0				4.94	2.59	4.68	0.93	19.8718	2.82	60.2564	3.03226	0.93	0.789	111.46	1.89	13.04	4.89
1329	1	0					159	75	29.6665	2	34	1	1.6	1	0				4.35	1.85	3.92	1.04	26.5306	2.14	54.5918	2.05769	0.74	1.986	92.87	1.56	13.88	4.39
1330	0.02	0					160	70.5	27.5391	2	39	2	0.6	1	0				5.15	1.21	3.42	1.31	38.3041	1.64	47.9532	1.25191	0.47	1.145	95.59	1.78	13.09	5.45
1331	0.04	0					168	56	19.8413	2	35	2	1.6	2	0				4.58	1.79	3.17	1.36	42.9022	1.52	47.9495	1.11765	0.29	1.405	105.31	1.51	13.77	4.45
1332	0.6	0					164	55	20.4491	2	30	1	1.9	1	1	3	4	75	4.7	1.22	4.74	1.25	26.3713	2.82	59.4937	2.256	0.67	1.025	114.03	1.84	14.78	4.37
1333	0.1	0					157	51	20.6905	2	47	2	0.5	1	0				5.77	0.71	4.76	1.98	41.5966	2.45	51.4706	1.23737	0.33	1.644	98.31	1.44	13.04	4.45
1334	2	0					156	49	20.1348	2	58	3	0.6	3	0				4.25	1.54	4.16	1.41	33.8942	2.22	53.3654	1.57447	0.53	1.331	94.06	1.04	14.02	3.92
1335	0.04	0					166	73	26.4915	1	34	1	0.1	1	0				5.12	1.51	2.86	0.67	23.4266	1.63	56.993	2.43284	0.56	1.673	88.18	1.48	13.35	4.85
1336	0.1	0					159	64	25.3155	2	25	1	0.4	1	0				4.75	0.6	4.08	1.42	34.8039	2.38	58.3333	1.67606	0.28	1.053	109.2	1.69	15.65	4.64
1337	0.2	0					160	60	23.4375	2	51	2	0.4	1	0				5.37	0.82	5.01	1.51	30.1397	3.02	60.2794	2	0.48	1.8	94.73	1.51	11.97	5.46
1338	0.05	1		1			183	70	20.9024	1	33	1	1.2	3	1	9	16	56.25	4.53	0.96	4.26	1.41	33.0986	2.47	57.9812	1.75177	0.38	2.343	112.47	1.6	18.46	4.84
1339	0.1	0					170	72.5	25.0865	1	36	2	1	1	1	4	5	80	4.47	2.53	3.79	0.77	20.3166	2.33	61.4776	3.02597	0.69	3.932	143.55	1.14	15.1	4.23
1340	1	0					180	91	28.0864	1	34	1	1	1	1	4	4	100	4.89	1.13	4.01	0.81	20.1995	2.66	66.3342	3.28395	0.54	0.39	120.04	1.52	13.59	4.21
1341	0.1	0					151	51.5	22.5867	2	62	3	0.9	2	0				4.79	1.73	5.85	1.1	18.8034	3.63	62.0513	3.3	1.12	1.99	79.55	1.36	14.37	4.77
1342	0.1	0					170	76.5	26.4706	1	49	2	0.5	2	0				5.73	1.19	5.14	0.97	18.8716	3.49	67.8988	3.59794	0.68	0.796	89.8	1.66	12.64	4.93
1343	2	0					163	54	20.3244	2	59	3	0.7	1	0				4.53	0.85	5.21	1.48	28.4069	3.1	59.501	2.09459	0.63	1.146	99.81	1.84	12.64	4.41
1344	1	0					150	54	24	2	57	3	0.6	3	0				4.82	1.47	4.28	1.1	25.7009	2.54	59.3458	2.30909	0.64	0.559	102.76	1.5	12.93	4.69
1345	N	0					170	80	27.6817	1	57	3	0.4	1	0				5.27	1.71	4.21	0.84	19.9525	2.68	63.658	3.19048	0.69	0.782	88.27	1.53	12.71	4.17
1346	1	0					161	50	19.2894	2	39	2	1.2	3	1	6	11	54.5455	4.53	0.8	4.39	1.7	38.7244	2.35	53.5308	1.38235	0.34	0.76	71.63	1.63	12.73	5.12
1347	2	0					160	50	19.5312	2	58	3	0.3	1	0				4.87	1.74	4.61	1.26	27.3319	2.52	54.6638	2	0.83	0.672	94.87	1.8	13.61	5.26
1348	0.3	0					158	47.5	19.0274	2	32	1	0.5	2	0				4.8	0.56	4.39	1.19	27.1071	2.56	58.3144	2.15126	0.64	1.589	103.66	1.47	13.85	5.27
1349	0.1	0					170	77	26.6436	2	26	1	2.5	3	1	17	21	80.9524	4.77	1.7	5.48	1.16	21.1679	3.51	64.0511	3.02586	0.81	1.006	100.65	1.82	12.71	5.36
1350	0.2	0					163	64	24.0882	2	30	1	0.7	1	0				5.57	1.94	4.71	0.96	20.3822	3.05	64.7558	3.17708	0.7	0.805	100.18	1.6	13.73	4.52
1351	0.2	0					170	72	24.9135	1	46	2	1.3	3	1	5	69	7.24638	5.08	1.51	3.24	0.73	22.5309	1.8	55.5556	2.46575	0.71	1.387	96.62	1.38	13.68	4.5
1352	1	0					159	54	21.3599	2	58	3	0.6	1	1	3	7	42.8571	4.88	1.81	4.19	0.96	22.9117	2.46	58.7112	2.5625	0.77	1.184	88.74	1.78	14.42	5.48
1353	3	0					158	54	21.6311	2	57	3	0.5	1	0				5.25	1.56	3.82	1.07	28.0105	2.42	63.3508	2.26168	0.33	0.965	102.6	1.43	13.02	4.61
1354	0.3	0					158	58	23.2335	2	46	2	0.5	2	1	1	4	25	4.76	1.2	5.73	1.49	26.0035	3.88	67.7138	2.60403	0.36	6.211	115.36	1.7	13.46	4.99
1355	0.05	0					168	69	24.4473	1	48	2	2.4	1	1	2	5	40	4.44	0.86	3.35	1.24	37.0149	1.77	52.8358	1.42742	0.34	1.181	94.72	1.57	14.58	4.83
1356	0.1	0					170	85	29.4118	1	33	1	0.6	1	0				4.76	0.86	3.37	0.85	25.2226	2.09	62.0178	2.45882	0.43	1.016	114.96	1.38	12.42	4.14
1357	0.2	1	1				165	70	25.7117	1	29	1	0.7	1	1	6	7	85.7143	4.31	1.94	3.53	0.63	17.847	2.27	64.3059	3.60317	0.63	1.483	97.14	1.45	12.73	4.25
1358	0.1	0					158	52.2	20.9101	2	50	2	0.5	1	1	1	3	33.3333	4.44	1.03	5.13	1.62	31.5789	3.1	60.4288	1.91358	0.41	2.03	110.81	1.77	14.52	5.16
1359	0.1	0					166	56.5	20.5037	2	54	2	1.3	2	0				5.27	0.77	3.98	1.18	29.6482	2.34	58.794	1.98305	0.46
1360	0.04	0					154	54	22.7694	2	59	3	0.5	1	1	1	11	9.09091	5.83	2.21	6.15	1.45	23.5772	3.84	62.439	2.64828	0.86	1.176	99.84	1.26	13.67	4.77
1361	0.1	0					168	50	17.7154	2	29	1	1.7	1	1	3	15	20	4.64	0.33	3.98	2.39	60.0503	1.46	36.6834	0.610879	0.13	1.007	90.95	1.99	14.11	5.46
1362	0.1	0					150	55	24.4444	2	53	2	1	1	1	3	5	60	3.99	3.4	7.85	1.62	20.6369	5.19	66.1146	3.2037	1.04	3.287	102	1.93	12.01	5.69
1363	1	1		1			158	66.5	26.6384	2	57	3	0.3	1	0				4.87	2.15	3.25	0.8	24.6154	1.58	48.6154	1.975	0.87	6.088	76.43	1.64	12.16	5.12
1364	0.1	0					162	60	22.8624	2	52	2	1.4	1	0				6.18	1.24	4.6	1.25	27.1739	2.94	63.913	2.352	0.41	1.893	87.99	1.63	13.21	4.71
1365	0.3	0					166	60	21.7738	1	40	2	0.5	1	1	2	5	40	5.14	0.62	4.54	1.72	37.8855	2.48	54.6256	1.44186	0.34	0.942	90.02	1.73	13.23	4.68
1366	2	0					165	52.5	19.2837	1	66	3	2.1	1	1	2	5	40	4.51	1.01	4.73	1.3	27.4841	2.69	56.871	2.06923	0.74	0.635	89.23	1.98	15.36	4.6
1367	0.1	0					160	55	21.4844	2	29	1	0.8	1	0				5.54	0.47	4.39	1.58	35.9909	2.48	56.492	1.56962	0.33	2.365	116.79	1.57	14.47	4.32
1368	N	0					161	60	23.1473	2	33	1	0.3	1	0				4.81	0.98	4.43	1.46	32.9571	2.64	59.5937	1.80822	0.33	1.686	100.9	1.85	12.4	5.43
1369	2	0					160	60	23.4375	2	31	1	0.8	1	0				4.54	0.9	4.01	0.87	21.6958	2.54	63.3416	2.91954	0.6	2.016	113.3	1.78	12.83	4.86
1370	0.1	0					153	59	25.204	2	40	2	0.7	2	0				5.04	2.05	3.78	1.01	26.7196	2.07	54.7619	2.0495	0.7	2.608	117.05	1.73	12.28	4.12
1371	1	0					155	55	22.8928	2	52	2	0.2	1	0				4.96	1.01	5.02	1.06	21.1155	3.36	66.9323	3.16981	0.6	2.28	101.69	1.73	15.14	4.85
1372	0.1	0					178	76	23.9869	1	53	2	0.6	1	0				4.66	1.01	3.85	0.84	21.8182	2.54	65.974	3.02381	0.47	2.897	99.03	1.96	15.19	4.69
1373	0.06	0					173	65	21.7181	1	30	1	0.6	3	1	7	34	20.5882	4.41	1.09	3.72	1.1	29.5699	1.99	53.4946	1.80909	0.63	0.942	112.05	1.67	13.95	5.7
1374	0.1	0					172	75	25.3515	1	31	1	0.5	1	0				4.42	1.44	3.77	1.04	27.5862	2.01	53.3156	1.93269	0.72	1.471	122.16	1.63	13.72	4.56
1375	0.2	0					176	78	25.1808	1	39	2	0.4	1	1	2	7	28.5714	4.66	2.05	3.55	0.87	24.507	1.88	52.9577	2.16092	0.8	1.267	99.12	1.3	14.16	4.76
1376	0.1	0					157	52	21.0962	2	36	2	1	1	0				4.81	0.74	3.46	1.59	45.9538	1.6	46.2428	1.00629	0.27	3.28	89.59	1.46	12.14	4.01
1377	0.4	0					158	53	21.2306	2	58	3	1	1	1	1	2	50	4.64	0.98	4.78	1.31	27.4059	2.81	58.7866	2.14504	0.66	1.085	131.45	1.8	15.46	4.73
1378	0.03	0					179	66.5	20.7547	1	31	1	1.5	1	1	3	3	100	4.19	1.71	5.53	0.91	16.4557	3.71	67.0886	4.07692	0.91	1.374	87.38	1.61	12.38	4.42
1379	0.03	0					152	48	20.7756	2	61	3	1.3	2	0				4.89	1.21	5.85	1.98	33.8462	3.28	56.0684	1.65657	0.59	3.104	83.35	1.43	12.23	3.71
1380	0.1	0					163	55	20.7008	2	35	2	0.4	3	1	2	56	3.57143	4.64	0.87	3.72	1.15	30.914	2.1	56.4516	1.82609	0.47	1.87	111.07	1.59	13.38	4.7
1381	0.1	0					163	68	25.5937	2	46	2	1.5	2	0				4.73	1.41	3.4	0.75	22.0588	2.02	59.4118	2.69333	0.63	0.917	83.59	1.93	14.31	4.93
1382	0.1	0					162	56	21.3382	2	39	2	0.4	1	0				6.1	2.14	4.5	1.08	24	2.64	58.6667	2.44444	0.78	1.462	113.26	1.95	14.73	5.33
1383	1	0					155	52.5	21.8522	2	38	2	0.3	1	0				4.96	1.43	4.64	1.82	39.2241	2.27	48.9224	1.24725	0.55	1.094	82.51	1.72	14.41	5.02
1384	0.2	0					172	57	19.2672	1	23	1	0.4	1	1	6	21	28.5714	4.98	0.65	3.08	1.24	40.2597	1.46	47.4026	1.17742	0.38	0.968	83.7	1.46	12.54	3.94
1385	0.1	0					160	71	27.7344	2	46	2	0.6	2	1	2	6	33.3333	5.17	1.77	7.26	1.28	17.6309	4.92	67.7686	3.84375	1.06	2.157	94.41	2.15	12.52	5.24
1386	0.1	0					154	57	24.0344	2	53	2	1	3	1	4	11	36.3636	4.61	3.1	5.23	1.01	19.3117	2.78	53.1549	2.75248	1.44	2.116	122.5	1.44	16.57	3.89
1387	0.1	0					165	59	21.6713	2	36	2	0.6	1	1	2	5	40	5.07	0.76	4	1.33	33.25	2.23	55.75	1.67669	0.44	1.234	87.15	1.41	13.31	4.36
1388	0.06	0					174	81	26.7539	1	48	2	1.2	2	0				5.93	1.63	4.68	1	21.3675	3.06	65.3846	3.06	0.62	0.717	98.99	1.47	14.9	4.92
1389	0.1	0					167	62.5	22.4103	1	65	3	0.5	1	0				4.92	1.07	6.09	1.59	26.1084	3.81	62.5616	2.39623	0.69	1.157	128.61	1.82	14.73	4.69
1390	0.1	0					170	70	24.2215	1	37	2	0.5	1	1	1	1	100	4.64	1.27	4.07	0.96	23.5872	2.46	60.4423	2.5625	0.65	0.619	136.73	1.38	13.28	3.66
1391	1	0					158	47.5	19.0274	2	36	2	2.5	1	0				4.43	0.97	4.37	1.44	32.9519	2.52	57.6659	1.75	0.41	1.661	108.45	1.31	12.91	3.22
1392	0.08	1	1		1		155	69.5	28.9282	2	39	2	0.6	3	0				4.77	1.07	4.41	0.98	22.2222	2.84	64.3991	2.89796	0.59	2.054	61.87	1.3	15.9	3
1393	0.04	0					160	75	29.2969	1	55	2	2.3	1	1	6	13	46.1538	4.54	1.76	4.38	1.15	26.2557	2.59	59.1324	2.25217	0.64	4.898	123.36	1.24	14.18	4.75
1394	0.05	0					172	85	28.7317	1	36	2	0.8	1	1	1	4	25	5.43	1.78	6.07	1.2	19.7694	4.08	67.2158	3.4	0.79	1.337	98.54	1.7	10.59	4.28
1395	0.5	1			1		163	65	24.4646	2	40	2	0.7	3	1	1	6	16.6667	5.49	1.19	3.99	1.11	27.8195	2.36	59.1479	2.12613	0.52	0.883	96.53	1.38	14.13	3.93
1396	0.1	0					165	51	18.7328	2	50	2	0.4	1	1	1	13	7.69231	6.51	0.56	4.17	1.76	42.2062	2.09	50.1199	1.1875	0.32	1.935	110.73	1.3	11.94	4.21
1397	1	0					160	56	21.875	2	42	2	0.8	1	1	1	6	16.6667	5.41	0.54	4.45	1.27	28.5393	2.83	63.5955	2.22835	0.35	0.451	89	1.43	12.76	4.11
1398	1	0					160	60	23.4375	2	35	2	0.8	1	0				4.88	0.54	3.53	1.5	42.4929	1.74	49.2918	1.16	0.29	1.265	112.74	1.36	13.95	3.65
1399	0.9	0					158	47	18.8271	2	35	2	0.4	1	0				5.58	0.54	4.08	1.91	46.8137	1.87	45.8333	0.979058	0.3	0.751	92.41	1.89	13.31	4.89
1400	0.1	0					170	57	19.7232	2	44	2	0.6	1	0				4.93	0.91	4.56	1.63	35.7456	2.2	48.2456	1.34969	0.73	0.887	90.33	1.58	13.86	4.26
1401	0.1	0					158	53	21.2306	2	46	2	0.9	1	1	9	19	47.3684	4.97	0.49	4.04	1.6	39.604	2.03	50.2475	1.26875	0.41	0.85	117.45	1.55	12.96	4.39
1402	0.05	0					165	86	31.5886	2	52	2	0.7	1	1	4	11	36.3636	5.18	2.07	4.97	1.26	25.3521	2.8	56.338	2.22222	0.91	1.957	103.56	1.53	13.85	4.09
1403	0.6	0					160	51	19.9219	2	37	2	1.5	7	0				5.58	2.51	5.07	0.97	19.1321	3.37	66.4694	3.47423	0.73	1.524	104.56	1.33	12.25	4
1404	0.1	0					172	58	19.6052	1	29	1	0.6	1	1	2	6	33.3333	4.6	1.48	3.65	0.98	26.8493	2.04	55.8904	2.08163	0.63	1.749	112.37	1.71	15.48	5.32
1405	0.02	0					162	61	23.2434	2	46	2	0.4	1	0				5	0.61	4.1	1.33	32.439	2.53	61.7073	1.90226	0.24	1.715	128.99	1.81	13.77	5.56
1406	20	0					153	57	24.3496	2	62	3	0.5	3	0				5.2	0.91	6.02	1.48	24.5847	3.96	65.7807	2.67568	0.58	2.981	82.81	1.54	13.69	3.98
1407	0.2	1			1		167	66	23.6652	1	73	3	1.6	2	1	2	16	12.5	4.83	0.91	4.15	1.23	29.6386	2.37	57.1084	1.92683	0.55	6.176	95	1.24	12.14	4.34
1408	0.02	0					170	83.5	28.8927	2	56	3	0.6	1	0				5.26	1.86	3.63	0.97	26.7218	1.93	53.168	1.98969	0.73	1.853	128.98	1.75	13.83	4.93
1409	0.1	0					153	48	20.5049	2	41	2	0.5	1	1	3	6	50	5.07	0.63	3.29	1.32	40.1216	1.68	51.0638	1.27273	0.29	3.325	121.01	1.65	13.02	5.26
1410	1	0					158	63	25.2363	2	54	2	0.5	1	0				5.45	2.51	5.94	0.78	13.1313	4.05	68.1818	5.19231	1.11	3.6	92.99	1.49	14.58	4.66
1411	0.1	0					150	51	22.6667	2	70	3	0.9	1	0				4.64	3.98	4.91	0.92	18.7373	2.56	52.1385	2.78261	1.43	2.226	132.11	1.43	15.47	4.92
1412	0.1	0					161	70.5	27.198	2	44	2	1.2	2	1	2	3	66.6667	4.24	1.35	5.36	1.28	23.8806	3.28	61.194	2.5625	0.8	1.789	112.85	1.75	11.67	5.5
1413	2	0					158	64.5	25.8372	2	60	3	0.5	1	0				6.71	1.23	3.86	1.31	33.9378	1.99	51.5544	1.51908	0.56	1.94	96.85	1.61	12.59	5.16
1414	0.4	0					155	60	24.974	2	44	2	0.2	1	0				4.88	1.47	3.75	1.36	36.2667	1.66	44.2667	1.22059	0.73	1.061	113.48	1.38	13.12	4.28
1415	2	0					167	65	23.3067	2	39	2	0.9	1	0				4.61	2.43	4.14	0.82	19.8068	2.11	50.9662	2.57317	1.21	4.346	95.86	1.39	12.64	3.9
1416	0.9	0					176	77.5	25.0194	1	30	1	0.7	3	0				4.72	1.23	5.56	1.27	22.8417	3.45	62.0504	2.71654	0.84	0.762	100.45	1.34	12.91	4.18
1417	N	0					160	41	16.0156	2	32	1	0.4	1	1	1	7	14.2857	4.7	0.66	3.85	1.47	38.1818	1.93	50.1299	1.31293	0.45	1.31	93.55	1.56	13.16	4.79
1418	0.5	0					159.5	53	20.8331	2	37	2	0.7	1	0				4.96	1.11	4.06	1.24	30.5419	2.43	59.8522	1.95968	0.39	1.578	97.77	1.49	12.92	4.62
1419	3	0					178	80	25.2493	1	30	1	2.5	2	1	11	32	34.375	4.56	0.54	3.21	1.21	37.6947	1.59	49.5327	1.31405	0.41	1.238	72.35	1.39	15.09	4.18
1420	0.35	0					160	50	19.5312	2	41	2	0.5	1	0				4.68	1.03	5.12	1.67	32.6172	2.96	57.8125	1.77246	0.49	1.169	113.44	1.67	13.06	5.16
1421	5	0					183	70	20.9024	1	30	1	3	1	1	2	2	100	5.43	2.51	4.68	0.97	20.7265	2.69	57.4786	2.7732	1.02	2.171	99.31	1.68	12.78	5.01
1422	0.1	0					158	70	28.0404	2	52	2	0.3	1	0				5.53	2.06	4.73	1.02	21.5645	2.88	60.8879	2.82353	0.83	1.032	101.28	1.36	13.87	4.47
1423	3	0					172	80	27.0416	1	37	2	0.6	1	0				5.31	2.66	5.65	1.11	19.646	3.52	62.3009	3.17117	1.02	3.125	131.26	1.4	12.98	3.95
1424	1	0					166	78	28.306	2	36	2	0.5	1	0				4.92	1.33	4.16	0.96	23.0769	2.57	61.7788	2.67708	0.63	1.337	98.05	1.48	11.21	4.49
1425	2	0					160	52	20.3125	2	30	1	1.2	1	1	9	39	23.0769	4.92	1.03	4.89	1.16	23.7219	3.12	63.8037	2.68966	0.61	2.299	93.05	1.21	11.36	5.19
1426	1	0					171	76	25.9909	1	31	1	0.3	1	0				4.62	1.17	3.99	0.8	20.0501	2.67	66.9173	3.3375	0.52	0.757	84.78	1.13	12.19	3.39
1427	3	0					170	56.5	19.5502	2	57	3	0.5	2	0				4.83	2.06	4.63	1.28	27.6458	2.73	58.9633	2.13281	0.62	0.777	114.85	1.14	12.97	4.68
1428	2	0					167	63	22.5896	2	33	1	0.5	1	1	3	5	60	5.1	1.17	4.44	1.27	28.6036	2.49	56.0811	1.96063	0.68	1.946	93.42	1.84	12.99	4.56
1429	5	0					160	70	27.3438	2	59	3	0.4	2	0				5.02	1.25	4.28	1.08	25.2336	2.53	59.1121	2.34259	0.67	3.869	93.79	1.97	12.41	4.13
1430	3	0					177	80	25.5354	1	57	3	0.8	1	1	1	3	33.3333	5.84	2.01	5.2	0.71	13.6538	3.66	70.3846	5.15493	0.83	1.728	126.51	1.67	13.1	3.21
1431	4	0					165	57.5	21.1203	2	50	2	0.9	5	1	1	15	6.66667	5.26	0.69	4.13	1.47	35.5932	2.29	55.4479	1.55782	0.37	0.273	85.35	1.48	16.52	4.68
1432	0.1	0					168	52	18.424	2	29	1	0.5	1	1	6	15	40	5.03	1.22	3.46	1.17	33.815	1.75	50.578	1.49573	0.54	1.458	111.53	1.28	11.41	5.43
1433	0.1	0					160	53.5	20.8984	2	72	3	1.7	1	0				4.59	1.75	3.76	1.36	36.1702	1.74	46.2766	1.27941	0.66	1.709	104.51	1.96	12.94	4.12
1434	6	0					162	52	19.8141	2	50	2	0.5	2	0				5.18	1.27	4.51	1.64	36.3636	2.18	48.337	1.32927	0.69	0.982	103.19	2.06	14.62	3.7
1435	4	0					170	63	21.7993	2	40	2	1.6	3	1	2	9	22.2222	4.69	0.59	4.53	1.68	37.0861	2.62	57.8366	1.55952	0.23	0.706	98.22	1.62	15.61	4.57
1436	4	0					165	54	19.8347	2	47	2	0.4	1	0				4.43	0.79	3.41	1.15	33.7243	1.88	55.132	1.63478	0.38	1.72	104.5	1.64	13.06	5.5
1437	N	0					176	65	20.984	1	37	2	0.2	1	0				4.67	1.53	4.92	1.15	23.374	3.13	63.6179	2.72174	0.64	1.124	98.47	1.35	14.22	4.01
1438	1	0					165	60	22.0386	2	42	2	0.7	2	1	4	8	50	4.63	0.81	4.2	1.16	27.619	2.85	67.8571	2.4569	0.19	1.374	87.36	1.46	15.39	3.85
1439	0.2	1	1		1		160	60	23.4375	1	59	3	3	1	1	16	56	28.5714	4.88	1.16	3.73	0.94	25.2011	2.32	62.1984	2.46809	0.47	0.059	122.77	1.29	13.73	3.84
1440	6	0					158	64	25.6369	2	59	3	1	2	1	6	28	21.4286	4.78	0.83	3.52	1.31	37.2159	1.81	51.4205	1.38168	0.4	1.35	99.94	1.68	12.31	4.37
1441	0.25	0					167	78.5	28.1473	1	40	2	0.7	1	0				5.26	0.61	4.8	1.12	23.3333	3.17	66.0417	2.83036	0.51	1.505	121.12	1.35	14.57	4.9
1442	2	0					158	51	20.4294	2	50	2	0.7	1	0				5.55	2.8	3.07	0.81	26.3844	1.37	44.6254	1.69136	0.89	3.342	116.41	1.58	13.31	4.55
1443	0.2	0					180	70	21.6049	1	59	3	0.7	2	1	5	14	35.7143	5.13	0.63	4.09	1.41	34.4743	2.39	58.4352	1.69504	0.29	0.85	94.84	1.28	13.14	4.09
1444	0.03	0					161	68	26.2336	2	46	2	1	2	0				5.02	0.95	4.03	1.21	30.0248	2.49	61.7866	2.05785	0.33	1.051	112.49	1.08	14.05	3.43
1445	1	0					175	71	23.1837	1	39	2	0.6	2	1	2	5	40	5.11	0.54	3.06	1.1	35.9477	1.7	55.5556	1.54545	0.26	1.321	91.39	1.63	12.83	4.96
1446	3	0					184	80	23.6295	1	35	2	0.3	1	0				4.97	1.13	5	1.14	22.8	3.34	66.8	2.92982	0.52	2.662	111.69	1.53	13.64	4.66
1447	0.04	1				1	160	60	23.4375	1	55	2	0.4	1	0				5.56	1.08	4.21	1.07	25.4157	2.62	62.2328	2.4486	0.52	1.808	124.27	1.24	13.93	3.44
1448	0.2	0					183	73.5	21.9475	1	36	2	0.8	1	1	1	5	20	5.33	1.76	4.32	0.68	15.7407	3.02	69.9074	4.44118	0.62	1.541	133.62	1.48	14.3	4.17
1449	0.2	0					161	49	18.9036	2	39	2	0.4	1	0				5.62	0.39	4.18	1.65	39.4737	2.27	54.3062	1.37576	0.26	1.2	98.69	1.66	13.85	4.81
1450	0.1	0					162.5	51	19.3136	2	26	1	0.3	1	0				5.29	0.9	4.64	1.62	34.9138	2.6	56.0345	1.60494	0.42	1.13	85.17	1.52	11.8	4.34
1451	0.1	0								2	35	2	0.6	1	0				4.43	1.14	4.19	1.26	30.0716	2.53	60.3819	2.00794	0.4	1.301	97.39	1.44	12.05	4.07
1452	1	0					150	49	21.7778	2	39	2	0.2	1	0				4.74	1.25	4.23	1.12	26.4775	2.7	63.8298	2.41071	0.41	1.184	104.91	1.7	16.11	4.97
1453	N	0					151	45.5	19.9553	2	35	2	1	2	1	2	12	16.6667	5.31	1.42	5.04	0.86	17.0635	3.53	70.0397	4.10465	0.65	3.147	93.74	1.68	15.46	4.75
1454	N	0					171	72	24.623	1	30	1	0.2	1	0				5.2	1.13	4.34	0.84	19.3548	2.61	60.1382	3.10714	0.89	0.597	125.78	1.33	13.91	3.85
1455	0.02	0					160	55	21.4844	2	54	2	0.6	1	1	1	8	12.5	5.44	1.67	6.27	1.04	16.5869	4.56	72.7273	4.38462	0.67	1.272	107.48	1.05	13.61	4.15
1456	2	0					156	59	24.2439	2	61	3	0.4	2	0				4.78	2.47	5.5	0.9	16.3636	3.39	61.6364	3.76667	1.21	2.541	106.42	1.24	11.31	4.09
1457	N	0					160	57.5	22.4609	2	49	2	0.2	1	0				4.94	1.02	4.27	1.07	25.0585	2.59	60.6557	2.42056	0.61	1.87	107.01	1.28	11.82	4.08
1458	2.5	0					170	62	21.4533	1	53	2	0.3	1	1	1	7	14.2857	5.88	2.17	4.6	0.92	20	2.61	56.7391	2.83696	1.07	0.138	113.83	1.26	14.21	3.03
1459	0.1	0					155	52	21.6441	2	29	1	3	1	0				5.18	0.94	3.69	1.4	37.9404	1.85	50.1355	1.32143	0.44	1.105	132.98	1.56	13.21	3.57
1460	1	0					158	60	24.0346	2	34	1	0.5	1	1	4	11	36.3636	5.48	1.65	4.62	1.41	30.5195	2.78	60.1732	1.97163	0.43	4.806	92.69	1.21	12.27	3.9
1461	0.1	0					153	49	20.9321	2	45	2	0.3	2	0				5.46	1.7	3.45	0.89	25.7971	1.77	51.3043	1.98876	0.79	2.543	87.23	1.21	13.94	3.94
1462	0.1	0					163	67	25.2174	2	55	2	1.5	1	0				4.52	1.03	2.79	1.01	36.2007	1.24	44.4444	1.22772	0.54	2.931	91.22	1.52	14.08	3.72
1463	7	0					150	45	20	2	37	2	0.6	1	0				4.66	1.59	4.05	1.12	27.6543	2.56	63.2099	2.28571	0.37	1.525	90.77	1.56	12.5	4.58
1464	N	0					155	54	22.4766	2	56	3	0.2	1	0				5.23	1.56	5.22	1.15	22.0307	3.2	61.3027	2.78261	0.87	1.327	114.68	1.38	14.39	4.59
1465	0.05	0					175	82	26.7755	1	68	3	0.8	1	0				5.45	1.35	4.54	0.97	21.3656	2.91	64.0969	3	0.66	2.332	92.44	1.54	12.87	4.97
1466	0.45	0					165	69	25.3444	2	42	2	0.5	1	1	2	5	40	5.09	1.12	3.68	1.15	31.25	2.2	59.7826	1.91304	0.33	1.834	88.61	1.56	11.06	4.83
1467	0.5	0					158	64	25.6369	2	59	3	0.7	2	0				5.88	2.5	5.12	0.93	18.1641	3.24	63.2812	3.48387	0.95	1.785	97.82	1.51	13.06	4.65
1468	0.05	0					158	48	19.2277	2	40	2	0.9	2	1	1	10	10	4.82	1.22	4.94	1.21	24.4939	3.38	68.4211	2.79339	0.35	2.755	109.99	1.57	13.29	4.3
1469	0.2	0					155	61	25.3902	2	52	2	0.5	1	0				4.08	1.58	5.53	1.33	24.0506	3.65	66.0036	2.74436	0.55	1.447	101.08	1.43	12.99	3.73
1470	0.2	0					156	60	24.6548	2	51	2	0.6	1	1	1	2	50	6.28	1.62	4.25	1.07	25.1765	2.78	65.4118	2.59813	0.4	0.764	121.4	1.57	13.7	4.79
1471	4	0					165	50	18.3655	2	38	2	0.3	1	0				4.51	1.05	3.93	1.11	28.2443	2.43	61.8321	2.18919	0.39	1.378	110.27	1.55	13.11	4.38
1472	2	0					160	46	17.9688	2	45	2	0.6	2	0				4.57	0.76	4.34	1.38	31.7972	2.57	59.2166	1.86232	0.39	1.431	72.53	1.46	11.51	4.74
1473	0.3	0					162	65	24.7676	2	55	2	0.7	2	1	2	22	9.09091	5.08	2.51	5.25	1.13	21.5238	3.44	65.5238	3.04425	0.68	1.216	84.03	1.63	13.76	5.04
1474	0.1	0					176	50	16.1415	1	40	2	0.6	1	0				4.83	0.85	4.61	0.87	18.872	3.27	70.9328	3.75862	0.47	2.828	110.59	1.58	12.37	4.8
1475	1	0					158	57.3	22.9531	2	57	3	0.3	1	0				4.78	2.54	4.26	1.08	25.3521	1.94	45.5399	1.7963	1.24	3.002	135.78	1.68	14.69	4.73
1476	0.15	0					156	65	26.7094	2	44	2	1	4	0				5.12	1.72	4.52	0.97	21.4602	2.87	63.4956	2.95876	0.68	1.106	109.34	1.19	12.75	4.68
1477	0.1	0					171	71	24.281	1	43	2	0.7	1	1	3	4	75	4.8	3.76	3.69	0.66	17.8862	1.58	42.8184	2.39394	1.45	1.166	130.2	1.42	14.48	5.09
1478	0.08	0					170	70	24.2215	1	38	2	0.7	1	0				4.83	2.48	4.84	0.73	15.0826	3.1	64.0496	4.24658	1.01
1479	4	0					165	60	22.0386	1	31	1	0.3	1	0				4.98	1.25	4.38	1.11	25.3425	2.66	60.7306	2.3964	0.61	1.21	101.97	1.31	14.53	3.29
1480	0.25	0					166	63	22.8625	1	54	2	0.8	1	0				4.97	1.7	4.78	0.94	19.6653	3.1	64.8536	3.29787	0.74	1.385	89.16	1.71	12.02	4.99
1481	0.1	1			1		160	57	22.2656	2	55	2	0.9	5	1	13	23	56.5217	4.72	1.73	5.14	1.09	21.2062	3.31	64.3969	3.0367	0.74	2.205	103.01	1.42	11.08	4.31
1482	1	1		1			174	75	24.7721	1	59	3	0.8	1	0				5.74	1.33	3.26	1.19	36.5031	1.54	47.2393	1.29412	0.53	0.672	107.66	1.5	15.8	5
1483	0.08	0					169	74	25.9095	1	58	3	1	3	0				5.27	0.86	3.77	0.97	25.7294	2.41	63.9257	2.48454	0.39	1.936	87.06	1.68	13.03	5.26
1484	3	0					160	70	27.3438	2	54	2	0.8	2	0				4.68	3.86	6.15	0.89	14.4715	3.56	57.8862	4	1.7	1.583	100.64	1.19	13.05	4.73
1485	0.2	0					158	59	23.634	2	64	3	1	2	0				5.64	0.99	3.67	1.15	31.3351	2.2	59.9455	1.91304	0.32
1486	0.7	0					173.5	55	18.2711	2	38	2	0.6	1	0				3.89	0.92	4.11	1.13	27.4939	2.6	63.2603	2.30088	0.38	1.551	110.03	1.21	12.95	4.32
1487	0.6	0					156	46	18.902	2	40	2	0.6	1	1	1	4	25	4.53	0.65	3.61	1.13	31.3019	2.26	62.6039	2	0.22	0.524	115.21	1.54	13.88	5.77
1488	0.03	0					162	54	20.5761	2	26	1	0.8	1	1	3	13	23.0769	5.15	0.72	3.51	1.37	39.0313	1.86	52.9915	1.35766	0.28	1.299	117.52	1.55	14.31	5.38
1489	0.1	0					155	49	20.3954	2	54	2	1.2	1	0				5.6	2.17	5.97	1.06	17.7554	3.79	63.4841	3.57547	1.12	2.501	102.93	1.4	14.73	4.53
1490	1	0					163.5	82	30.6746	1	43	2	1.5	1	1	2	4	50	4.05	1.69	4.34	1.09	25.1152	2.82	64.977	2.58716	0.43	1.024	75.74	1.42	14.43	4.58
1491	0.1	0					165	58	21.3039	1	58	3	1.2	5	1	1	10	10	5.27	1.68	4.69	0.9	19.1898	3.28	69.936	3.64444	0.51	0.64	85.84	1.18	12.13	4.8
1492	0.05	0					163	62	23.3355	2	33	1	0.7	1	0				4.87	0.73	5.05	1.48	29.3069	3.05	60.396	2.06081	0.52	0.855	96.28	1.5	12.79	3.9
1493	0.1	0					162	55	20.9572	2	61	3	0.6	2	0				5.4	0.68	4.29	1.68	39.1608	2.22	51.7483	1.32143	0.39	0.568	129.45	1.26	12.45	4.43
1494	0.2	0					173	72	24.0569	1	39	2	1.2	1	1	3	9	33.3333	5.29	2.17	5.97	1.06	17.7554	3.79	63.4841	3.57547	1.12	1.468	108.35	1.68	13.83	5.39
1495	0.2	0					160	62	24.2188	2	34	1	0.3	1	0				5.23	1.95	5.27	1.04	19.7343	3.26	61.8596	3.13462	0.97	1.929	119.68	1.49	13.94	4.19
1496	0.1	0					160	80	31.25	2	53	2	1.5	2	1	7	31	22.5806	5.26	1.65	4.14	0.97	23.43	2.36	57.0048	2.43299	0.81	0.045	99.85	0.7	14.96	2.31
1497	0.3	0					160	57.5	22.4609	2	29	1	0.4	1	0				4.9	0.46	3.32	1.57	47.2892	1.26	37.9518	0.802548	0.49	2.133	121.71	1.65	12.75	5.11
1498	0.3	0					158	55	22.0317	2	30	1	0.6	1	0				5.05	0.8	4.59	1.48	32.244	2.9	63.1808	1.95946	0.21	1.499	126.41	1.85	13.84	5.51
1499	0.1	1			1		158	60	24.0346	2	67	3	1.4	2	1	3	13	23.0769	5.66	2.21	5.85	1.14	19.4872	3.84	65.641	3.36842	0.87
1500	7	0					180	97.5	30.0926	1	35	2	0.7	1	1	1	2	50	5.11	0.97	3.99	1.03	25.8145	2.54	63.6591	2.46602	0.42	4.859	68.47	1.62	14.66	4.52
1501	0.25	0					172	75	25.3515	1	52	2	0.5	2	1	4	10	40	5.1	0.99	2.89	1.19	41.1765	1.32	45.6747	1.10924	0.38	2.135	108.61	1.38	16.18	4.72
1502	2	0					160	62	24.2188	1	56	3	0.4	1	1	2	3	66.6667	5.09	1.47	5.3	1.79	33.7736	3	56.6038	1.67598	0.51	1.388	105.09	1.47	11.78	4.63
1503	0.1	0					164	53	19.7055	2	33	1	0.4	4	1	3	4	75	4.98	0.67	3.49	1.51	43.2665	1.56	44.6991	1.03311	0.42	1.483	80.28	1.37	13.17	4.44
1504	3	0					155	50	20.8117	2	43	2	0.7	1	0				4.72	0.89	4.19	1.24	29.5943	2.62	62.5298	2.1129	0.33	4.196	95.39	1.41	11.32	3.75
1505	1	0					150	60	26.6667	2	51	2	0.7	2	0				4.84	2.4	3.59	1.06	29.5265	1.93	53.7604	1.82075	0.6	0.833	120.62	1.31	15.2	4.28
1506	4	0					170	75	25.9516	1	38	2	0.9	1	1	7	8	87.5	4.27	1.75	4.9	1.15	23.4694	2.9	59.1837	2.52174	0.85	0.924	63.29	1.58	12.6	4.83
1507	0.04	0					168	72	25.5102	1	34	1	0.7	1	1	7	8	87.5	4.81	2.14	4.39	0.84	19.1344	2.7	61.5034	3.21429	0.85	0.688	84.46	1.29	15.44	4.29
1508	1	0					176	81	26.1493	1	46	2	0.8	1	1	2	8	25	5.43	1.68	3.93	0.9	22.9008	2.24	56.9975	2.48889	0.79	2.701	91.49	1.47	12.11	4.89
1509	N	0					158	56	22.4323	2	52	2	0.9	1	0				5.64	0.53	5.41	2.05	37.8928	2.96	54.7135	1.4439	0.4	0.893	118.26	1.35	12.66	4.97
1510	N	0					160	48	18.75	2	35	2	1.8	2	1	3	6	50	5.34	1.09	4.86	1.98	40.7407	2.24	46.0905	1.13131	0.64	1.788	96.49	1.21	14.41	4.09
1511	0.2	0					155	41	17.0656	2	38	2	0.6	1	0				4.88	0.53	4.04	1.47	36.3861	2.25	55.6931	1.53061	0.32	1.917	112.87	1.38	14.62	4.41
1512	N	0					161	62	23.9188	2	46	2	0.2	1	0				4.54	1.33	4.01	1.31	32.6683	2.06	51.3716	1.57252	0.64	2.996	87.87	1.34	13.94	4.73
1513	N	0								2	35	2	0.6	1	0				4.98	0.63	2.63	1.38	52.4715	0.89	33.8403	0.644928	0.36	4.307	91.54	1.31	15.1	4.22
1514	1	0					166	56	20.3223	2	43	2	0.4	1	0				4.6	0.87	2.98	1.34	44.9664	1.25	41.9463	0.932836	0.39	2.801	110.1	1.22	14.38	4.29
1515	10	0					160	74	28.9062	2	58	3	3	1	0				6.26	1.61	5.95	1.39	23.3613	3.71	62.3529	2.66906	0.85	0.755	108.48	1.43	12.22	5.33
1516	1	0					162	50	19.052	2	53	2	0.2	1	1	1	8	12.5	4.99	0.35	3.48	1.35	38.7931	1.86	53.4483	1.37778	0.27	2.319	94.66	1.54	12.43	4.72
1517	5	1		1			162	57	21.7193	1	53	2	1	2	0				4.44	1.1	4.54	0.81	17.8414	3.09	68.0617	3.81481	0.64	1.816	105.82	1.52	14.82	4.73
1518	0.03	0					164	55	20.4491	1	61	3	0.4	1	0				4.31	1.82	5.54	1.1	19.8556	3.27	59.0253	2.97273	1.17	1.671	107.88	1.42	14.08	4.59
1519	0.8	0					150	57.5	25.5556	2	43	2	0.6	2	0				5.16	0.55	3.73	1.23	32.9759	2.18	58.445	1.77236	0.32	0.833	55.15	1.56	13.36	5.28
1520	2	0					166	78	28.306	1	67	3	1	2	0				5.03	2.82	4.93	1.12	22.7181	2.59	52.5355	2.3125	1.22	2.334	81.21	1.14	13.22	4.72
1521	3	0					155	42	17.4818	2	59	3	0.6	1	1	2	4	50	5.02	1.92	5.28	1.15	21.7803	3.07	58.1439	2.66957	1.06	1.047	83.96	1.25	11.99	3.22
1522	0.25	0					155	60	24.974	2	51	2	0.4	1	0				4.83	1.94	4.63	1.13	24.406	2.61	56.3715	2.30973	0.89	0.861	97.59	1.75	14.72	4.72
1523	0.06	0					152	46	19.91	2	51	2	0.8	2	0				5.61	0.62	5.36	2.72	50.7463	2.3	42.9104	0.845588	0.34	3.895	114.87	1.1	12.51	4.29
1524	N	0					163	52	19.5717	2	27	1	0.8	3	1	1	5	20	4.57	0.66	3.85	1.4	36.3636	2.11	54.8052	1.50714	0.34	1.092	115.79	1.5	14.51	5.24
1525	0.04	0					153	58	24.7768	2	58	3	0.4	2	0				4.43	1.05	5.7	1.56	27.3684	3.62	63.5088	2.32051	0.52	0.764	87.97	1.8	14.08	5.21
1526	0.2	0					169	50	17.5064	2	33	1	1.3	1	1	11	29	37.931	5.23	0.79	3.83	1.1	28.7206	2.44	63.7076	2.21818	0.29	1.308	104.76	1.7	13.81	5.11
1527	0.5	0					165	78.5	28.8338	1	40	2	2.8	1	0				5.42	3.17	4.39	0.92	20.9567	2.4	54.6697	2.6087	1.07	1.417	133.38	1.45	12.72	4.31
1528	1	0					178	73	23.04	1	45	2	1	3	1	7	18	38.8889	4.99	1.09	5.06	1.23	24.3083	3.14	62.0553	2.55285	0.69	1.332	89.81	1.6	15.78	5.38
1529	0.1	0					175	79	25.7959	1	37	2	0.7	1	0				4.93	0.9	2.55	0.97	38.0392	1.21	47.451	1.24742	0.37	0.601	91.91	1.52	12.26	4.46
1530	0.1	0					162	65	24.7676	2	49	2	0.7	1	0				5.14	0.82	5.71	1.07	18.7391	3.95	69.1769	3.69159	0.69	1.705	94.82	1.21	13.56	4.43
1531	0.2	0					160	58	22.6562	2	53	2	0.8	2	1	3	14	21.4286	5.08	0.86	4.76	1.37	28.7815	2.77	58.1933	2.0219	0.62	1.154	130.72	1.8	12.37	4.71
1532	0.05	0					161	65	25.0762	2	60	3	0.6	1	0				5.07	0.97	3.88	1.18	30.4124	2.08	53.6082	1.76271	0.62	2.18	90.23	1.39	14.97	4.43
1533	0.2	0					172	60	20.2812	1	58	3	1.3	3	1	7	10	70	5.56	1.13	6.05	1.68	27.7686	3.75	61.9835	2.23214	0.62	2.314	92.71	1.16	14.83	4.85
1534	0.1	1	1		1		161	70	27.0051	1	55	2	0.5	1	0				5	1.97	4.06	1.05	25.8621	2.2	54.1872	2.09524	0.81	2.089	111.45	1.5	13.34	4.6
1535	2	0					163	55	20.7008	2	34	1	0.4	1	0				5.38	0.75	4.07	1.8	44.226	1.71	42.0147	0.95	0.56	0.73	82.95	1.51	12.94	5.07
1536	N	0					160	50	19.5312	2	35	2	0.4	1	1	2	9	22.2222	5.23	0.52	4.43	1.74	39.2777	2.24	50.5643	1.28736	0.45	1.037	110.6	1.54	13.51	4.26
1537	5	0					160	54	21.0938	2	38	2	1.5	2	1	4	9	44.4444	5.1	0.52	3.04	1.4	46.0526	1.41	46.3816	1.00714	0.23	3.799	109.12	1.28	15.37	4.14
1538	0.1	0					160	64	25	2	25	1	0.8	1	0				5.12	3.44	5.61	0.87	15.508	3.26	58.1105	3.74713	1.48	1.7	109.82	1.77	13.47	5.46
1539	0.5	0					155	55	22.8928	2	38	2	1	1	0				5.52	0.6	4.5	2.06	45.7778	2.02	44.8889	0.980583	0.42	0.651	107.65	1.65	13.4	4.74
1540	5	0					179	105	32.7705	1	39	2	0.8	1	1	4	9	44.4444	5.27	2.05	5.95	0.99	16.6387	4.05	68.0672	4.09091	0.91	1.03	79.39	1.2	14.55	3.87
1541	0.16	0					159	60	23.7332	2	52	2	0.5	2	0				5.85	1.61	5.79	1.66	28.6701	3.47	59.9309	2.09036	0.66	1.621	130.03	1.48	15.59	5.06
1542	1	0					166	57	20.6852	2	35	2	0.4	1	0				4.72	0.67	3.52	1.15	32.6705	2.09	59.375	1.81739	0.28	1.532	101.8	1.59	14.37	4.58
1543	3	0					178	70	22.0932	1	51	2	0.5	1	0				5.89	1.41	4.07	0.97	23.8329	2.65	65.1106	2.73196	0.45	1.1	113.94	1.37	13.71	3.49
1544	0.1	0					170	86	29.7578	1	32	1	0.6	1	1	2	4	50	4.47	3.15	4.51	1.17	25.9424	2.31	51.2195	1.97436	1.03	1.273	102.88	1.46	13.76	4.83
1545	0.1	0					162	53	20.1951	2	59	3	1	1	1	1	4	25	5.49	1.47	4.33	1.23	28.4065	2.58	59.5843	2.09756	0.52	1.06	98.12	1.04	12.71	3.5
1546	1	1			1		168	80	28.3447	2	40	2	1.4	3	0				4.78	0.95	5.17	1.31	25.3385	3.41	65.9574	2.60305	0.45	1.125	74.15	1.53	14.02	4.22
1547	0.08	0					166	72	26.1286	1	35	2	1.6	2	1	9	10	90	5.3	1.05	3.42	0.88	25.731	2	58.4795	2.27273	0.54	1.215	92.84	1.36	13.8	4.51
1548	0.2	0					163	61	22.9591	2	44	2	0.6	2	1	4	9	44.4444	4.63	1.1	4.79	1.11	23.1733	3.02	63.048	2.72072	0.66	2.418	107.13	1.35	11.74	4.45
1549	0.05	0					160	64	25	2	34	1	0.8	2	0				5.26	1.28	4.13	0.98	23.7288	2.46	59.5642	2.5102	0.69	2.182	89.8	1.46	13.65	4.57
1550	0.1	0					175	75	24.4898	1	37	2	0.5	1	0				5.25	0.97	3.46	1.01	29.1908	1.87	54.0462	1.85149	0.58	1.457	99.53	1.51	13.74	4.6
1551	0.1	0					158	63	25.2363	2	49	2	0.4	1	0				5.69	0.7	4.41	1.27	28.7982	2.53	57.3696	1.99213	0.61	3.456	101.79	1.49	13.67	4.83
1552	6	1		1	1		175	78	25.4694	1	47	2	2.2	1	0				6.39	1.9	5.69	1.29	22.6714	3.42	60.1054	2.65116	0.98	2.454	94.93	1.3	13.59	4.32
1553	0.25	0					170	67.5	23.3564	2	23	1	1.1	1	1	1	3	33.3333	4.65	0.62	3.56	1.53	42.9775	1.64	46.0674	1.0719	0.39	1.927	110.16	1.45	12.68	5.16
1554	6	0					170	80	27.6817	1	37	2	0.6	1	0				5.05	1.8	4.02	0.99	24.6269	2.37	58.9552	2.39394	0.66	2.081	107.95	1.64	13.8	4.97
1555	1	0					158	57.5	23.0332	2	32	1	0.2	1	0				5.01	0.81	4.28	1.35	31.5421	2.56	59.8131	1.8963	0.37	2.209	104.33	1.5	14.11	5.05
1556	2	0					164	51.5	19.1478	2	50	2	0.7	1	0				4.67	1.2	4.42	1.17	26.4706	2.42	54.7511	2.06838	0.83	2.441	96.03	1.71	13.11	4.4
1557	3	0					167	50	17.9282	2	36	2	0.9	1	1	1	6	16.6667	5.13	0.55	4.79	1.72	35.9081	2.62	54.6973	1.52326	0.45	2.041	120.29	1.22	13.35	4.71
1558	0.1	0					168	65	23.03	2	44	2	1.8	1	0				5.01	1.51	5	1.38	27.6	2.74	54.8	1.98551	0.88	1.725	115.06	1.77	12.27	4.61
1559	10	1				1	163	62	23.3355	2	66	3	0.6	2	1	1	10	10	5.39	2.13	6.16	0.97	15.7468	4.11	66.7208	4.23711	1.08	2.009	93.31	1.52	11.76	5.6
1560	2	0					175	90	29.3878	2	37	2	0.4	1	0				5.25	1.67	5.74	1.27	22.1254	3.73	64.9826	2.93701	0.74	1.391	101.47	1.68	13.92	4.98
1561	0.5	0					159	60	23.7332	2	57	3	0.3	1	1	1	9	11.1111	4.96	1.71	5.87	1.54	26.2351	3.61	61.4991	2.34416	0.72	2.785	98.36	1.27	13.65	4.2
1562	0.04	0					174	82	27.0842	1	29	1	0.9	1	1	2	13	15.3846	5.05	2.37	4.59	0.94	20.4793	2.79	60.7843	2.96809	0.86	1.672	114.32	1.5	13.69	4.86
1563	0.1	0					160	65	25.3906	2	68	3	1.5	2	1	2	10	20	5.71	0.7	5.41	1.22	22.5508	3.47	64.1405	2.84426	0.72	1.299	110.07	1.36	13.22	4.85
1564	0.02	0					170	85	29.4118	2	43	2	0.4	1	0				5	1.46	5.58	1.59	28.4946	3.33	59.6774	2.09434	0.66	1.32	89.66	1.35	13.45	4.91
1565	0.3	0					172	68	22.9854	1	46	2	0.6	1	1	1	5	20	4.73	1.19	4.81	1.04	21.6216	3.21	66.736	3.08654	0.56	1.433	82.27	1.57	13.3	4.04
1566	0.1	0					173	84	28.0664	1	39	2	0.8	2	1	9	10	90	4.73	1.09	4.56	1.14	25	2.53	55.4825	2.2193	0.89	1.404	104.35	1.64	13.76	4.98
1567	0.3	0					155	52	21.6441	2	58	3	0.4	1	0				4.68	1.6	5.8	1.25	21.5517	3.53	60.8621	2.824	1.02	1.143	87.06	1.39	12.64	4.44
1568	1	1		1			154	59	24.8777	2	54	2	0.2	2	0				5.43	1.07	5.11	1.17	22.8963	3.39	66.3405	2.89744	0.55
1569	0.05	0					161	62	23.9188	2	25	1	1.1	1	0				4.83	0.54	4.09	1.19	29.0954	2.4	58.6797	2.01681	0.5	2.707	118.28	1.74	13.23	5.63
1570	5	0					166	61	22.1367	2	32	1	0.8	1	1	1	4	25	5.13	1.09	4.14	1.06	25.6039	2.47	59.6618	2.33019	0.61	1.321	90.23	1.39	13.1	4.99
1571	0.1	1		1			155	65	27.0552	2	63	3	3.8	3	1	9	21	42.8571	5.44	2.63	3.97	1.06	26.7003	1.91	48.1108	1.80189	1	1.791	84.59	1.67	12.63	5.32
1572	0.05	0					165	75	27.5482	1	38	2	1.5	2	1	1	8	12.5	5.52	4.32	5.1	0.94	18.4314	2.57	50.3922	2.73404	1.59	1.897	96.34	1.34	12.95	5.01
1573	0.2	0					180	70	21.6049	1	59	3	0.7	2	1	5	14	35.7143	5.34	0.74	5.13	1.27	24.7563	3.17	61.7934	2.49606	0.69	0.637	107.06	1.42	12.14	4.83
1574	0.4	0					176	68	21.9525	1	59	3	0.7	1	1	3	6	50	5.68	1.18	4.28	1.07	25	2.72	63.5514	2.54206	0.49	2.608	110.07	1.33	14.28	4.61
1575	0.5	0					160	50	19.5312	2	38	2	0.5	2	1	5	5	100	4.78	1.45	4.45	1.7	38.2022	2.25	50.5618	1.32353	0.5	1.782	115.05	1.65	12.39	5.43
1576	3	0					155	55	22.8928	2	46	2	0.5	3	1	2	6	33.3333	4.72	1.03	3.96	1.2	30.303	2.25	56.8182	1.875	0.51	1.513	114.49	1.18	12.84	4.12
1577	10	1		1			159	51	20.1733	2	44	2	0.3	2	0				5.26	1.4	3.72	0.99	26.6129	2.33	62.6344	2.35354	0.4	4.72	92.49	1.33	14.64	4.82
1578	0.2	0					168	49	17.3611	1	61	3	0.2	2	1	4	11	36.3636	5	0.82	4.66	1.56	33.4764	2.74	58.7983	1.75641	0.36	1.514	120.49	1.39	14.32	4.77
1579	0.1	0					160	62	24.2188	2	44	2	3.5	1	0				5.24	1.41	4.04	0.99	24.505	2.64	65.3465	2.66667	0.41	0.649	110.3	1.43	14.59	5
1580	0.06	0					160	63	24.6094	2	41	2	0.4	1	0				4.44	0.86	4.09	1.2	29.3399	2.61	63.8142	2.175	0.28	2.618	117.58	1.66	13.31	4.83
1581	0.06	0					160	63	24.6094	2	48	2	0.7	1	1	2	10	20	5.01	2.07	4.52	1.03	22.7876	2.82	62.3894	2.73786	0.67	1.787	90.62	1.75	14.05	5.53
1582	0.1	0					170	63.8	22.0761	2	35	2	0.9	1	0				5.04	0.73	4.93	2.11	42.7992	2.63	53.3469	1.24645	0.19	1.25	88.38	1.54	14.05	5.33
1583	0.05	0					160	54	21.0938	2	34	1	1.8	1	1	12	23	52.1739	5.31	0.69	3.76	1.29	34.3085	2.15	57.1809	1.66667	0.32	1.142	98.02	1.18	13.2	4.85
1584	2.5	1	1				160	42	16.4062	2	61	3	0.3	2	0				4.74	0.86	5.87	1.81	30.8348	3.45	58.7734	1.90608	0.61	1.738	89.61	1.08	13.25	3.65
1585	1	1		1			163	70	26.3465	1	35	2	0.5	2	1	1	5	20	5.25	0.58	3.12	1.2	38.4615	1.59	50.9615	1.325	0.33	0.72	92.87	1.13	13.56	4.27
1586	0.05	0					175	93	30.3673	1	31	1	0.7	2	0				6.38	3.9	4.42	0.7	15.8371	2.38	53.8462	3.4	1.34	1.072	103.5	1.48	12.56	4.79
1587	5	0					159	51	20.1733	2	57	3	0.5	2	0				5.51	1.34	4.71	1.02	21.6561	3.01	63.9066	2.95098	0.68	0.962	108.28	1.61	12.89	5.02
1588	0.1	0					170	80	27.6817	1	72	3	0.8	4	1	3	10	30	6.62	1.09	3.18	1.1	34.5912	1.54	48.4277	1.4	0.54	3.079	115.95	1.66	14.88	5.45
1589	0.03	0					179	90	28.089	1	48	2	0.3	1	0				5.42	2.19	5.56	1.04	18.705	3.55	63.8489	3.41346	0.97	0.685	114.54	1.38	14.79	4.5
1590	1	0					160	57	22.2656	2	35	2	0.3	1	0				5.3	0.56	3.86	1.32	34.1969	2.16	55.9585	1.63636	0.38	1.301	130.42	1.41	13.49	5.42
1591	2	0					180	63	19.4444	1	26	1	0.8	1	1	4	22	18.1818	4.72	1.12	3.64	1.07	29.3956	1.96	53.8462	1.83178	0.61	3.506	102.88	1.41	14.43	4.86
1592	1	0					177	88	28.089	1	63	3	0.5	1	0				5.84	1.7	5.18	1.32	25.4826	3.08	59.4595	2.33333	0.78	1.835	119.59	1.33	12.75	5.14
1593	5	0					173	80	26.7299	1	65	3	2.5	1	0				5.3	1.53	5.49	1.7	30.9654	2.81	51.184	1.65294	0.98
1594	0.2	0					163	68	25.5937	2	35	2	0.8	2	0				5.51	0.94	5.04	1.05	20.8333	3.43	68.0556	3.26667	0.56	1.031	82.18	1.35	11.03	5.04
1595	0.2	0					177	98.6	31.4724	1	35	2	1.6	1	0				6.43	2.19	4.99	1	20.0401	2.99	59.9198	2.99	1	2.065	92.36	1.48	15.51	4.6
1596	0.2	0					157	48	19.4734	2	41	2	0.4	1	0				5.19	0.53	3.72	1.15	30.914	2.17	58.3333	1.88696	0.4	1.812	101.21	1.5	14.69	4.93
1597	1	0					178	84	26.5118	1	39	2	0.5	1	0				4.9	1.94	3.3	0.81	24.5455	1.72	52.1212	2.12346	0.77	1.609	97.21	1.27	12.72	4.54
1598	0.1	0					168	58	20.5499	2	39	2	0.7	1	1	1	3	33.3333	5.03	1.62	6.21	1.43	23.0274	3.86	62.1578	2.6993	0.92	1.102	81.3	1.2	11.65	4.62
1599	0.1	0					160	46.5	18.1641	2	33	1	0.7	1	0				5.42	0.89	5.3	1.56	29.434	3.41	64.3396	2.1859	0.33	1.331	144.73	1.61	13.87	4.12
1600	5	1		1			173	67	22.3863	1	58	3	1.1	1	0				5.7	1.72	5.94	1.3	21.8855	3.8	63.9731	2.92308	0.84	0.877	111.48	1.07	13.14	3.58
1601	0.02	0					174	70	23.1206	1	27	1	0.8	1	1	5	13	38.4615	4.32	1.41	4.13	0.82	19.8547	2.59	62.7119	3.15854	0.72	1.39	98.56	1.3	13.9	4.1
1602	7	0					150	45	20	2	67	3	1.2	1	0				5.21	0.35	3.23	1.97	60.9907	1.15	35.6037	0.583756	0.11	2.924	128.83	1.35	15.38	4.05
1603	0.4	1		1	1		152	59	25.5367	2	37	2	0.5	1	1	4	11	36.3636	5.35	1.17	4.91	1.15	23.4216	3.13	63.7475	2.72174	0.63	1.005	79.76	1.47	14.54	5
1604	0.1	0					160	62.5	24.4141	2	36	2	1.3	1	0				4.86	0.52	2.77	1.03	37.1841	1.4	50.5415	1.35922	0.34	2.93	127.33	1.61	12.26	5.16
1605	0.03	0					156	57	23.4221	2	35	2	2.8	2	1	11	38	28.9474	4.9	0.92	3.4	1.09	32.0588	1.88	55.2941	1.72477	0.43	0.518	86.12	1.58	17.06	4.92
1606	4	0					166	54	19.5965	2	53	2	1.5	1	1	3	4	75	5.82	0.52	5.67	2.04	35.9788	3.1	54.6737	1.51961	0.53	1.481	89.82	1.26	11.77	4.69
1607	0.05	0					160	63.5	24.8047	2	53	2	1	2	0				5.44	0.5	3.4	1.63	47.9412	1.38	40.5882	0.846626	0.39	2.641	84.91	1.74	12.84	5.18
1608	N	0					170	80	27.6817	1	34	1	1.8	1	1	2	4	50	4.99	1.61	4.7	1.02	21.7021	2.97	63.1915	2.91176	0.71	1.857	96.63	1.2	12.85	4.65
1609	N	0					162	50	19.052	2	40	2	0.3	1	0				5.16	0.79	5.03	1.89	37.5746	2.7	53.6779	1.42857	0.44	2.169	98.47	1.37	13.73	4.8
1610	0.1	0					160	54	21.0938	2	49	2	1.2	2	0				5.21	0.89	4.38	1.52	34.7032	2.46	56.1644	1.61842	0.4	1.097	104.1	1.57	12.42	4.38
1611	6	0					160	54	21.0938	2	53	2	0.6	1	0				5.8	0.74	5.53	1.73	31.2839	3.28	59.3128	1.89595	0.52	1.275	110.92	1.45	14.29	6.64
1612	0.2	0					155	84	34.9636	2	34	1	0.8	1	0				5.02	1.39	3.87	1.14	29.4574	2.22	57.3643	1.94737	0.51	2.147	109.05	1.27	12.9	4.34
1613	0.08	0					153	48	20.5049	2	41	2	0.6	1	1	1	2	50	4.92	0.33	4.25	1.75	41.1765	2.12	49.8824	1.21143	0.38	1.15	116.3	0.99	15.28	4.71
1614	0.2	0					162	50	19.052	2	29	1	0.7	1	1	3	8	37.5	4.75	0.61	5.09	1.96	38.5069	2.71	53.2417	1.38265	0.42	2.829	106.76	1.43	14.26	4.42
1615	0.3	0					160	80	31.25	1	28	1	0.5	1	1	1	8	12.5	4.95	1.36	3.72	1.04	27.957	2.07	55.6452	1.99038	0.61	0.887	132.63	2.32	15.16	5.22
1616	0.7	1		1	1		170	69	23.8754	1	46	2	0.3	1	0	1	6	16.6667	4.23	2.71	7.59	1.34	17.6548	4.74	62.4506	3.53731	1.51	1.328	97.25	1.53	17.08	4.59
1617	0.1	0					155	51	21.2279	2	55	2	0.7	2	0				5.76	1.41	4.96	1.35	27.2177	2.9	58.4677	2.14815	0.71	2.762	112.02	1.52	13.82	4.95
1618	0.5	0					152	52.5	22.7233	2	53	2	0.8	1	0				5.21	1.45	4.79	1.25	26.096	2.94	61.3779	2.352	0.6	1.234	93.9	1.4	11.77	4.85
1619	6	0					168	50	17.7154	2	69	3	0.3	1	0				5.27	1.38	4.62	1.76	38.0952	2.19	47.4026	1.24432	0.67	0.591	100.97	1.14	13.89	3.84
1620	4	0					169	55	19.257	2	33	1	0.5	1	0				4.86	0.54	2.86	1.07	37.4126	1.52	53.1469	1.42056	0.27	1.219	110.22	1.37	14.59	4.99
1621	0.02	0					156	53.7	22.0661	2	49	2	0.5	1	1	1	5	20	5.13	1.01	4.88	1.31	26.8443	3.08	63.1148	2.35115	0.49	1.18	103.09	1.44	12.82	4.68
1622	0.1	1			1		183	92	27.4717	1	38	2	0.7	1	1	1	15	6.66667	5.21	1.08	4.33	1.37	31.6397	2.54	58.6605	1.85401	0.42	1.537	112.67	1.46	14.07	4.26
1623	1	0					158	54	21.6311	2	28	1	0.5	2	0				4.42	0.56	3.74	1.11	29.6791	2.36	63.1016	2.12613	0.27	2.08	116.66	1.3	11.71	4.3
1624	1	0					160	60	23.4375	2	51	2	0.5	2	0				5.64	1.2	5.85	1.56	26.6667	3.84	65.641	2.46154	0.45	4.594	110.54	1.32	13.85	3.93
1625	0.1	0					158	50	20.0288	2	29	1	1.3	1	1	2	6	33.3333	5.06	0.49	3.7	1.52	41.0811	1.93	52.1622	1.26974	0.25	1.285	88.92	1.37	14.58	4.53
1626	0.1	0					173	70	23.3887	1	54	2	0.6	1	0				5.32	1.16	4.37	1.12	25.6293	2.93	67.0481	2.61607	0.32	1.112	103.89	1.53	15.97	4.27
1627	0.1	0					155	60	24.974	2	35	2	0.4	1	0				5.6	0.79	3.59	1.08	30.0836	2.18	60.7242	2.01852	0.33	0.828	91.43	1.26	12.8	3.65
1628	0.05	0					160	60	23.4375	1	62	3	1.2	1	0				4.5	1.47	3.18	0.71	22.327	1.88	59.1195	2.64789	0.59	0.602	115.66	1.34	12.08	5.16
1629	0.5	0					150	52.5	23.3333	2	51	2	0.6	1	1	1	5	20	5.17	1.18	4.38	1.25	28.5388	2.35	53.653	1.88	0.78	3.939	78.78	1.34	10.81	4.27
1630	3	0					156	55	22.6003	2	50	2	0.4	1	0				5.88	0.42	3.98	1.49	37.4372	2.06	51.7588	1.38255	0.43	0.793	86.13	1.51	12.11	5.4
1631	2	0					158	45.5	18.2262	2	64	3	0.5	1	0				5.26	0.93	4.94	1.55	31.3765	2.64	53.4413	1.70323	0.75	1.583	98.3	1.8	14.96	5.66
1632	1	0					160	57.5	22.4609	2	49	2	0.5	1	0				5.4	1.21	4.79	1.19	24.8434	2.7	56.3674	2.26891	0.9	2.516	96.63	1.2	11.95	3.88
1633	2	0					155	61.5	25.5983	2	68	3	0.5	3	1	1	8	12.5	5.54	0.97	6.82	1.43	20.9677	4.79	70.2346	3.34965	0.6	1.349	106.39	1.62	13.87	4.23
1634	1	0					160	47	18.3594	2	26	1	0.6	1	1	1	4	25	4.67	0.69	3.97	1.51	38.0353	2.03	51.1335	1.34437	0.43	1.679	112.63	1.43	14.1	4.1
1635	3	0					155	57.5	23.9334	2	45	2	0.3	3	0				4.88	3.31	4.32	0.84	19.4444	2.39	55.3241	2.84524	1.09	0.845	122.17	1.51	14.16	4.47
1636	1	0					171	92	31.4627	1	44	2	0.9	1	1	1	2	50	4.22	2.1	2.61	0.74	28.3525	1.3	49.8084	1.75676	0.57	1.183	94.51	1.3	11.92	4.08
1637	0.02	0					160	63.5	24.8047	2	46	2	0.8	1	0				5.13	1.84	5.13	1.22	23.7817	3.37	65.692	2.7623	0.54	1.006	88.99	1.51	15.05	5.43
1638	6	0					157	58	23.5304	2	49	2	1.7	3	0				4.87	0.79	3.93	1.54	39.1858	2.07	52.6718	1.34416	0.32	2.749	94.19	1.37	13.42	4.52
1639	0.1	0					168	65	23.03	1	54	2	0.5	1	0				4.73	1.22	5.01	1.48	29.5409	3.11	62.0758	2.10135	0.42	1.128	76.86	1.12	12.02	3.4
1640	0.1	0					172	92	31.0979	1	45	2	1.2	5	1	7	41	17.0732	6.23	1.72	5.36	0.94	17.5373	3.71	69.2164	3.94681	0.71	2.861	84.07	1.52	19.92	4.97
1641	0.1	0					164	77.5	28.8147	2	34	1	0.5	1	0				5.94	2.92	4.79	0.84	17.5365	2.78	58.0376	3.30952	1.17	2.392	102.33	1.37	12.62	4.97
1642	0.06	0					158	58.5	23.4337	2	40	2	0.8	1	1	2	7	28.5714	5.04	0.29	3.27	1.38	42.2018	1.56	47.7064	1.13043	0.33	1.63	69.87	1.16	11.34	5.34
1643	0.05	0					160	52	20.3125	2	36	2	1.1	1	0				4.69	0.69	4.16	1.61	38.7019	2.06	49.5192	1.2795	0.49	1.603	102.47	1.61	12.27	5.13
1644	1	0					178	74	23.3556	1	29	1	0.8	1	1	5	7	71.4286	4.57	1.46	3.69	0.86	23.3062	2.14	57.9946	2.48837	0.69	1.256	108.97	1.49	13.95	5.4
1645	0.1	0					161	59	22.7615	2	24	1	0.8	2	1	2	18	11.1111	4.53	0.7	4.73	0.91	19.2389	3.07	64.9049	3.37363	0.75	1.745	120.98	1.41	20.87	4.23
1646	3	1		1			176	71	22.921	1	42	2	0.3	1	1	2	12	16.6667	5.29	0.68	4.62	1.36	29.4372	2.68	58.0087	1.97059	0.58	1.406	111.99	1.36	14.7	4.53
1647	0.4	0					165	47	17.2635	2	28	1	0.8	1	1	2	22	9.09091	5.45	0.55	4.17	1.67	40.048	2.06	49.4005	1.23353	0.44	0.01	137.38	1.6	15.69	5.24
1648	0.5	0					165	61	22.4059	2	36	2	0.3	2	0				4.78	0.86	4	1.2	30	2.3	57.5	1.91667	0.5	0.973	115.76	1.38	16.92	3.62
1649	3	0					159	57	22.5466	2	41	2	0.4	1	0				4.77	1.04	5.12	1.12	21.875	3.32	64.8438	2.96429	0.68	1.062	81.95	1.19	13.56	4
1650	0.05	0					162	50	19.052	2	35	2	1	3	1	1	7	14.2857	4.92	0.93	4.01	1.28	31.9202	2.17	54.1147	1.69531	0.56	2.171	90.95	1.43	12.18	4.82

## Sheet: Control group
NO	Gender(1:male,2:female)	Age (year)	Age groups(1:18-34;2:35-55;3:55-)	BMI	FBG (mmol/L)	TG (mmol/L)	TCH(mmol/L)	HDL-C (mmol/L)	HDL/TG	LDL-C (mmol/L)	LDL/TG	LDL/HDL	vLDL-C (mmol/L)	TSH(mIU/L)	TT4(nmol/L)	TT3(nmol/L)	FT4(pmol/L)	FT3(pmol/L)	甲状腺过氧化物酶抗体	甲状腺球蛋白抗体
1	2	55	2	23.07	4.6	4.11	6.17	1.08	17.5041	3.68	59.6434	3.40741	1.41	1.216	88.08	1.78	11.7	4.94	0.5	1.22
2	2	49	2	23.67	4.43	3.54	5.7	0.87	15.2632	3.28	57.5439	3.77011	1.55	2.099	103.79	1.2	12.65	4.25	0.51
3	2	64	3	24.14	4.86	3.46	4.69	0.72	15.3518	2.22	47.3348	3.08333	1.75	4.05	59.71	1.32	10.39	3.97	6.38
4	2	42	2	24.53	4.98	2.67	4.28	1.06	24.7664	2.12	49.5327	2	1.1	2.286	113.81	1.32	14.14	4.34	0.5	26.47
5	2	68	3	22.59	5.25	3.04	5.23	1.11	21.2237	2.76	52.7725	2.48649	1.36	2.012	116.38	1.7	12.12	4.76	0.05
6	2	52	2	24.17	5.33	3.27	5.68	0.96	16.9014	3.45	60.7394	3.59375	1.27	3.024	96.49	1.35	12.3	4.27	0.53	1.14
7	2	52	2	22.24	5.03	2.5	5.85	1.46	24.9573	3.37	57.6068	2.30822	1.02	2.125	95.11	1.34	12.95	4.04	982.99
8	2	50	2	18.85	4.11	1.93	5.22	1.53	29.3103	2.96	56.705	1.93464	0.73	1.34	95.19	1.23	12.33	4.32	0.5
9	2	50	2	19.54	4.72	1.99	4.41	1.5	34.0136	2.26	51.2472	1.50667	0.65
10	2	60	3	22.56	5	1.91	4.65	0.88	18.9247	2.83	60.8602	3.21591	0.94	2.353	105.73	1.5	13.99	4.37	1.01
11	2	49	2	23.81	5.26	1.9	4.5	1.53	34	2.51	55.7778	1.64052	0.46	1.275	85.13	1.75	13.36	4.74	37.61
12	2	54	2	24.18	5.84	1.79	5.19	1.27	24.4701	3.21	61.8497	2.52756	0.71	1.769	94.77	1.55
13	2	56	3	22.92	5.06	2.08	4.71	1.14	24.2038	2.78	59.0234	2.4386	0.79
14	2	54	2	24.96	4.59	1.49	4.57	1.26	27.5711	2.65	57.9869	2.10317	0.66	1.711	105.03	1.6	12.92	5.08
15	2	67	3	22.95	4.77	2.16	3.98	0.96	24.1206	2.12	53.2663	2.20833	0.9
16	2	68	3	28.94	5.12	2.33	4.33	1.37	31.6397	1.98	45.7275	1.44526	0.98	2.066	92.77	1.58	11.95	4.3	0.5
17	2	57	3	20.84	4.91	2.09	7.04	1.81	25.7102	4.11	58.3807	2.27072	1.12	0.92	91.84	1.6
18	2	59	3	24.13	4.77	1.68	4.68	0.99	21.1538	3	64.1026	3.0303	0.69	0.952	85.5	1.47
19	2	41	2	27.58	4.69	2.46	5.85	1.05	17.9487	3.51	60	3.34286	1.29
20	2	61	3	18.99	4.52	1.49	4.55	1.09	23.956	2.73	60	2.50459	0.73
21	2	39	2	21.36	4.45	1.41	6.94	1.81	26.0807	4.32	62.2478	2.38674	0.81
22	2	39	2		4.2	1.89	3.95	1.13	28.6076	2.04	51.6456	1.80531	0.78
23	2	42	2	21.62	4.88	1.98	4.15	0.93	22.4096	2.45	59.0361	2.63441	0.77
24	2	43	2	23.41	5.22	1.6	4.07	0.89	21.8673	2.3	56.5111	2.58427	0.88	0.897	83.25	1.38	12.54	4.1	0.5
25	2	50	2	22.43	5.03	1.99	4.68	1.01	21.5812	2.79	59.6154	2.76238	0.88	2.278	91.02	1.44
26	2	67	3	21.91	5.44	1.88	5.07	1.26	24.8521	2.89	57.002	2.29365	0.92	1.675	90.51	1.55	11.29	4	0.5
27	2	64	3	27.15	5.46	1.36	4.53	1.22	26.9316	2.53	55.8499	2.07377	0.78	0.855	102.97	1.62	13.41	4.3	0.5
28	2	42	2	21.06	4.2	1.52	5.01	1.31	26.1477	3.17	63.2735	2.41985	0.53	2.67	89.5	1.61	13.24	4.4
29	2	45	2	22.95	5.16	1.36	5.47	0.99	18.0987	3.52	64.351	3.55556	0.96	1.075	92.63	1.34
30	2	36	2	19.53	4.9	1.7	4.02	1.57	39.0547	1.82	45.2736	1.15924	0.63
31	2	29	1	24.09	3.91	1.75	4.37	1.33	30.4348	2.2	50.3432	1.65414	0.84	0.938	89.93	1.46
32	2	69	3		5.36	1.63	3.72	1.37	36.828	1.7	45.6989	1.24088	0.65	1.19	103.93	1.73	11.82	4.53	0.5
33	2	36	2	19.45	4.3	1.54	4.6	1.27	27.6087	2.47	53.6957	1.94488	0.86	0.859	75.79	1.12	12.47	3.72	0.5
34	2	37	2	20.57	4.8	1.68	3.9	1.02	26.1538	2.13	54.6154	2.08824	0.75
35	2	70	3	30.4	5.12	1.4	4.32	0.95	21.9907	2.55	59.0278	2.68421	0.82	1.738	104.62	1.43	14.56	4.34	3.04	0.61
36	2	47	2	27.57	5.9	1.8	4.34	0.94	21.659	2.76	63.5945	2.93617	0.64	1.716	101.32	1.67	13.78	4.49	0.5
37	2	62	3	25.87	4.64	1.41	3.89	1.19	30.5913	2.08	53.4704	1.7479	0.62
38	2	49	2	26.2	4.85	1.93	5.32	1.36	25.5639	2.99	56.203	2.19853	0.97	1.797	99.19	1.55
39	2	70	3	26.1	4.47	1.44	4.81	1.11	23.0769	3.06	63.6175	2.75676	0.64	1.282	111.12	1.53	12.05	4.52	0.57
40	2	48	2		5.53	1.49	4.62	1.08	23.3766	2.9	62.7706	2.68519	0.64
41	2	35	2	19.08	4.98	1.31	4.04	1.08	26.7327	2.29	56.6832	2.12037	0.67	2.805	69.93	1.29
42	2	52	2	22.32	4.43	1.64	4.89	1.18	24.1309	2.98	60.9407	2.52542	0.73	5.007	82.78	1.43	10.91	4.36	270.67
43	2	49	2	22.91	4.95	1.66	4.61	1.29	27.9826	2.68	58.1345	2.07752	0.61	1.704	84.85	1.47	11.29	3.74	2.2
44	2	51	2	23.08	4.76	1.5	5.4	1.77	32.7778	2.98	55.1852	1.68362	0.65	0.997	84	1.59	12.64	4.66	0.77	1.29
45	2	61	3	18.75	5.22	1.26	5.93	1.79	30.1855	3.64	61.3828	2.03352	0.5	1.159	125.74	1.86	13.37	4.94
46	2	59	3		4.94	1.55	5.8	1.4	24.1379	3.67	63.2759	2.62143	0.73	2.391	102.45	1.5
47	2	43	2	17.31	4.22	1.38	4.2	1.49	35.4762	2.19	52.1429	1.4698	0.52
48	2	28	1	20.68	5.36	1.2	3.73	1.12	30.0268	1.94	52.0107	1.73214	0.67	1.364	92.41	1.43
49	2	58	3	18.72	5.24	1.46	4.71	1.47	31.2102	2.53	53.7155	1.72109	0.71
50	2	60	3	25.62	4.83	1.62	5	1.43	28.6	2.77	55.4	1.93706	0.8	5.259	105.84	1.49	13.58	4.94	1000
51	2	42	2	25.1	5.53	1.44	3.9	0.95	24.359	2.49	63.8462	2.62105	0.46	1.763	116.27	1.63	16.29	4.64	0.5
52	2	54	2	20.17	4.46	1.39	5.3	1.79	33.7736	2.87	54.1509	1.60335	0.64	2.954	98.64	1.64	13.21	4.76	0.5	0.82
53	2	50	2	19.67	4.67	1.46	5.53	1.13	20.434	3.37	60.9403	2.9823	1.03	4.212	69.92	1.32	9.87	4.26	28.79	567.06
54	2	61	3	20.06	4.54	1.74	4.27	1.19	27.8689	1.97	46.1358	1.65546	1.11	1.567	98.46	1.36	12.71	4.15	0.5
55	2	42	2		5.01	1.2	4.29	1.18	27.5058	2.4	55.9441	2.0339	0.71
56	2	41	2	19.07	4.1	1.22	3.85	1.49	38.7013	2.01	52.2078	1.34899	0.35	1.459	99.3	1.39	14.19	4.57	3.03	2.52
57	2	44	2		5.42	1.31	4.95	1.28	25.8586	2.93	59.1919	2.28906	0.74
58	2	51	2	27.61	4.75	1.38	4.52	1.17	25.885	2.72	60.177	2.32479	0.63	3.202	100.84	1.9	10.36	4.99	0.75
59	2	68	3	24.57	5.61	1.42	5.27	1.24	23.5294	3.46	65.6546	2.79032	0.57	1.354	89.86	1.54
60	2	57	3	22.34	5.06	1.74	6.03	1.22	20.2322	4.1	67.9934	3.36066	0.71
61	2	53	2			1.69	4.99	1.3	26.0521	2.95	59.1182	2.26923	0.74
62	2	44	2	21.75	4.56	1.38	5.01	1.48	29.5409	2.92	58.2834	1.97297	0.61	0.628	106.45	1.5	12.77	4.07	0.63
63	2	54	2	22.79	4.94	1.28	4.94	1.48	29.9595	2.79	56.4777	1.88514	0.67	2.385	109.43	1.71	14.01	5.47	0.5
64	2	42	2	20.38	4.25	0.97	5.38	1.58	29.368	3.09	57.4349	1.9557	0.71	1.506	95.65	1.36	12.35	4.44	0.5
65	2	56	3	19.86	4.57	1.25	6.95	1.34	19.2806	4.82	69.3525	3.59701	0.79	1.454	75.58	1.25
66	2	53	2		5.98	1.4	5.39	1.36	25.2319	3.35	62.1521	2.46324	0.68
67	2	53	2	21.76	4.23	1.62	4.74	1.54	32.4895	2.56	54.0084	1.66234	0.64	1.24	122.22	1.51	14.98	4.48	0.64
68	2	45	2	25.63	4.58	1.57	4.39	1.16	26.4237	2.49	56.7198	2.14655	0.74	1.88	89.21	1.48	12.52	4.54	0.5	1.24
69	2	64	3	18.4	4.57	1.52	5.41	1.6	29.5749	3.04	56.1922	1.9	0.77	1.977	143.49	1.91	14.68	4.39	71.36
70	2	66	3	20.83	4.62	1.92	5.94	1.92	32.3232	3.12	52.5253	1.625	0.9
71	2	54	2	24.04	4.96	1.08	3.43	0.9	26.2391	1.98	57.7259	2.2	0.55	2.415	66.97	1.1
72	2	47	2	22.62	4.21	1.12	3.89	1.04	26.7352	2.39	61.4396	2.29808	0.46
73	2	62	3		5.66	1.09	5.81	2.22	38.21	3.07	52.8399	1.38288	0.52	2.347	103.07	1.58	12.77	4.24	0.5
74	2	64	3	27.74	4.45	1.44	4.3	0.87	20.2326	2.82	65.5814	3.24138	0.61	3.924	83.21	1.46	11.74	4.45	3.04
75	2	45	2	19.98	4.96	1.08	4.15	1.42	34.2169	2.27	54.6988	1.59859	0.46
76	2	50	2	23.24	4.81	1.09	4.89	1.21	24.7444	3.06	62.5767	2.52893	0.62	1.012	99.92	1.24	13.27	4.31
77	2	62	3	23.59	4.99	0.98	5.07	1.94	38.2643	2.68	52.86	1.38144	0.45	2.236	102.24	1.72	13.26	4.72	0.64
78	2	41	2	20.85	4.54	1.13	3.69	1.24	33.6043	2.12	57.4526	1.70968	0.33
79	2	28	1	21.22	4.61	1.26	3.39	1.06	31.2684	1.74	51.3274	1.64151	0.59
80	2	65	3	20.39	5.3	1.47	4.45	1.44	32.3596	2.33	52.3596	1.61806	0.68	2.195	98.89	1.29	12.2	4.73	0.5	0.84
81	2	51	2	18.17	4.8	1.27	5.65	1.81	32.0354	3.26	57.6991	1.8011	0.58	0.968	99.37	1.29	12.81	4.27	0.5	0.79
82	2	45	2	19.4	4.62	1	2.97	1.1	37.037	1.27	42.7609	1.15455	0.6	3.011	75.99	1.32	11.49	4.55	264.03
83	2	37	2	20.5	4.46	0.99	5.06	1.55	30.6324	2.79	55.1383	1.8	0.72	5.188	95.46	1.5
84	2	70	3	21.19	5.85	1.1	4.45	1.77	39.7753	2.43	54.6067	1.37288	0.25	2.305	89.66	1.51
85	2	63	3			1.16	3.79	1.18	31.1346	1.94	51.1873	1.64407	0.67
86	2	52	2	24.72	4.63	1.34	4.69	1.4	29.8507	2.55	54.371	1.82143	0.74
87	2	48	2	19.36	4.97	1.03	4.65	1.96	42.1505	2	43.0108	1.02041	0.69
88	2	30	1	18.72	5.11	1.23	4.92	1.75	35.5691	2.32	47.1545	1.32571	0.85	1.864	80.39	1.15
89	2	50	2	22.02	4.82	1.2	4.69	1.11	23.6674	2.97	63.3262	2.67568	0.61
90	2	49	2	23.25	4.96	1.24	5.25	1.34	25.5238	2.92	55.619	2.1791	0.99	1.156	112.04	1.6
91	2	46	2	19.23	4.66	0.76	4.43	1.17	26.4108	2.84	64.1084	2.42735	0.42	1.396	111.58	1.34	13.58	3.76	145.71
92	2	45	2	21.51	5.19	1.18	4.34	1.37	31.5668	2.66	61.2903	1.94161	0.31	0.496	65.92	1.3	12.13	4.47	0.5
93	2	49	2	22.25	4.5	0.95	3.32	1.16	34.9398	1.75	52.7108	1.50862	0.41	1.068	114.26	1.74	12.47	4.27	0.9
94	2	48	2	22.68	5	1.26	5.52	1.21	21.9203	3.73	67.5725	3.08264	0.58
95	2	41	2	19.86	4.42	0.94	6.28	2.03	32.3248	3.42	54.4586	1.68473	0.83	2.207	86.6	1.4	11.1	4.13	0.5
96	2	39	2	22.72	4.14	1.17	4.13	1.57	38.0145	2.18	52.7845	1.38854	0.38	3.707	81.57	1.23	11.39	4.1	1000	78.76
97	2	58	3	18.85	5.2	1.13	4.84	1.29	26.6529	3.01	62.1901	2.33333	0.54	1.092	108.52	1.5	13.68	4	357.96
98	2	57	3	23	4.24	1.13	5.47	1.51	27.6051	3.45	63.0713	2.28477	0.51	2.587	102.15	1.28	12.33	3.93	0.5
99	2	48	2	22.19	4.7	1.12	5.05	1.46	28.9109	2.76	54.6535	1.89041	0.83	1.541	90.52	1.48	11.98	5.08
100	2	42	2	24.05	4.9	1.02	3.91	1.16	29.6675	2.21	56.5217	1.90517	0.54	2.766	92.82	1.62	12.83	5.19
101	2	36	2		5.36	0.86	6.37	2.05	32.1821	3.67	57.6138	1.79024	0.65	2.175	107.81	1.42	14.16	3.86	0.5	1.29
102	2	51	2	21.05	3.85	1.03	4.42	2.02	45.7014	2.07	46.8326	1.02475	0.33	1.021	122.38	1.45	13.33	4.25	7.14
103	2	59	3	21.71	5.23	1.2	5.63	1.61	28.5968	3.28	58.2593	2.03727	0.74	1.397	101.15	1.34
104	2	45	2		4.42	1.12	5.22	1.36	26.0536	3.31	63.41	2.43382	0.55	5.045	107.85	1.58	12.04	4.08	0.5
105	2	47	2	21.34	4.27	1.1	5.05	1.46	28.9109	3.15	62.3762	2.15753	0.44	3.845	84.37	1.41
106	2	32	1		4.27	1.04	4.36	1.33	30.5046	2.37	54.3578	1.78195	0.66
107	2	59	3	22.51	4.43	1.15	3.74	1.03	27.5401	2.26	60.4278	2.19417	0.45	0.641	115.71	1.78	12.88	4.13	34.81
108	2	65	3		4.84	1.07	5.28	1.64	31.0606	3.28	62.1212	2	0.36	1.758	89.54	1.42	11.88	4.03	0.56	4.77
109	2	47	2		4.92	1.03	4.25	1.36	32	2.53	59.5294	1.86029	0.36
110	2	47	2		4.84	1.36	4.29	0.77	17.9487	2.67	62.2378	3.46753	0.85
111	2	54	2	24.05	5.47	1.13	4.97	1.55	31.1871	2.85	57.3441	1.83871	0.57	2.157	99.16	1.23
112	2	49	2		5.25	1.18	5.24	1.79	34.1603	3	57.2519	1.67598	0.45
113	2	42	2	18.67	4.65	1.03	3.66	0.95	25.9563	2.17	59.2896	2.28421	0.54	1.242	91.7	1.26	11.52	3.76	0.5
114	2	62	3	23.92	5.56	1.25	6.09	1.66	27.2578	4	65.6814	2.40964	0.43
115	2	55	2	22.93	4.54	0.93	4.77	1.36	28.5115	2.88	60.3774	2.11765	0.53
116	2	41	2	24.91	4.69	1.11	4.27	1.29	30.2108	2.44	57.1429	1.89147	0.54	3.164	61.1	1.14	11.17	4.02	1.61
117	2	56	3	23.45	4.45	1.2	5.14	1.26	24.5136	3.13	60.8949	2.48413	0.75	3.13	79.01	1.43	12.01	5.13	156.09	723.38
118	2	55	2	18.99	4.82	0.98	5.34	1.52	28.4644	3.19	59.7378	2.09868	0.63	0.565	97.31	1.54	12.22	5.36	0.5
119	2	50	2	20.89	4.83	1.3	3.81	1	26.2467	2.31	60.6299	2.31	0.5	2.972	94.76	1.53	11.75	5.03
120	2	58	3	24.92	4.35	0.9	4.31	2.2	51.0441	1.52	35.2668	0.690909	0.59
121	2	43	2	16.6	4.71	1.08	4.46	1.93	43.2735	2.08	46.6368	1.07772	0.45
122	2	29	1	22.34	3.99	1.02	3.29	1.08	32.8267	1.71	51.9757	1.58333	0.5
123	2	53	2	25.03	4.82	1.34	4.28	1.21	28.271	2.6	60.7477	2.14876	0.47	1.494	98.09	1.55	11.88	4.22	0.74
124	2	42	2	22.81	4.9	1.02	2.93	1.14	38.9078	1.22	41.6382	1.07018	0.57	0.851	87.15	1.47	10.91	4.19	0.5
125	2	46	2	30	5.62	0.93	4.29	1	23.31	2.74	63.8695	2.74	0.55
126	2	30	1	22.3	4.66	0.91	4.24	1.42	33.4906	2.35	55.4245	1.65493	0.47	1.179	93.43	1.41	13.68	4.81	0.71	1.22
127	2	32	1	21.67	4.73	1.02	4.77	1.25	26.2055	2.84	59.5388	2.272	0.68
128	2	37	2	26.3	4.5	1.12	3.53	1.22	34.5609	1.97	55.8074	1.61475	0.34
129	2	42	2	18.52	4.64	0.79	4.28	1.08	25.2336	2.72	63.5514	2.51852	0.48	1.869	102.69	1.16	11.9	4.35	0.5
130	2	42	2	23.14	4.88	0.96	4.27	1.59	37.2365	2.15	50.3513	1.3522	0.53
131	2	45	2		4.16	0.77	4.67	1.83	39.1863	2.22	47.5375	1.21311	0.62	0.61	89.64	1.16	11.87	3.95	0.5
132	2	50	2	26.81	4.45	0.92	5.13	1.39	27.0955	3.07	59.8441	2.20863	0.67	0.879	85.4	1.35	11.34	4.7	1.39
133	2	47	2		4.95	1.24	5.52	1.41	25.5435	3.46	62.6812	2.4539	0.65
134	2	42	2	19.83	4.05	1.12	3.41	1.45	42.522	1.31	38.4164	0.903448	0.65	2.489	98.18	1.52	12.53	4.57	0.5
135	2	51	2	25.99	5.66	1.1	4.42	1.12	25.3394	2.58	58.371	2.30357	0.72	0.765	89.64	1.32	13.41	3.79	0.67
136	2	53	2	23.29	5.54	1.15	5.3	1.4	26.4151	3.37	63.5849	2.40714	0.53	3.285	73.93	1.47	12.68	4.33	0.5
137	2	53	2	23.18	5.08	1.13	4.49	1.32	29.3987	2.67	59.4655	2.02273	0.5	1.573	82.82	1.48	11.41	4.86	0.5
138	2	39	2	25.3	4.71	1.28	5.76	1.34	23.2639	3.79	65.7986	2.82836	0.63	3.111	106.24	1.38	12.89	4.62	0.5
139	2	42	2	19.97	4.68	1.01	4.75	1.85	38.9474	2.28	48	1.23243	0.62	2.232	112.33	1.15	14.54	4.12	0.52
140	2	58	3	20.93	4.33	1.06	5.91	1.35	22.8426	3.83	64.8054	2.83704	0.73	3.12	107.38	1.64	12.38	4.43	0.5
141	2	32	1	23.15	4.55	0.77	3.35	1.29	38.5075	1.65	49.2537	1.27907	0.41
142	2	38	2	24.96	4.09	1.07	3.73	1.61	43.1635	1.72	46.1126	1.06832	0.4
143	2	48	2	19.56	4.28	0.9	4.89	2.14	43.7628	2.21	45.1943	1.03271	0.54	1.359	94.35	1.22	11.73	4.04	0.5
144	2	43	2	23.62	4.91	1.08	4.39	1.24	28.246	2.86	65.1481	2.30645	0.29	2.338	103.81	1.46	13.91	4.2	0.5
145	2	43	2	19.46	4.93	1.06	4.32	1.62	37.5	2.08	48.1481	1.28395	0.62	1.336	81.52	1.33
146	2	48	2	19.98	4.93	0.96	3.91	1.34	34.2711	1.99	50.8951	1.48507	0.58	4.792	95.84	1.26	11.84	4.21	178.32
147	2	54	2	20.29	4.09	0.91	4.05	1.58	39.0123	2.18	53.8272	1.37975	0.29	1.775	121.67	1.4	13.21	3.81	0.5
148	2	64	3	19.82	4.93	1.1	6.76	1.98	29.2899	4.13	61.0947	2.08586	0.65	1.825	97.24	1.68	12.46	4.36	10.5
149	2	39	2	18.01	4.44	1	4.93	2.06	41.785	2.71	54.9696	1.31553	0.16
150	2	40	2	20.19	5.16	0.98	4.2	1.09	25.9524	2.86	68.0952	2.62385	0.25
151	2	26	1	18.99	4.19	0.86	5.37	1.56	29.0503	3.27	60.8939	2.09615	0.54
152	2	52	2	22.31	4.56	0.94	3.71	1.28	34.5013	1.86	50.1348	1.45312	0.57
153	2	33	1	19.74	5.13	0.76	4.85	2.09	43.0928	2.5	51.5464	1.19617	0.26	1.48	107.91	1.52
154	2	44	2	19.42	4.79	0.87	3.69	1.41	38.2114	1.92	52.0325	1.3617	0.36	3.344	86.41	1.37	12.22	4.22	0.5	0.73
155	2	38	2	23.04	4.89	1.03	4.18	0.95	22.7273	2.54	60.7656	2.67368	0.69	0.601	93.88	1.41	12.28	5.2
156	2	66	3	28.91	4.94	0.78	4.07	1.31	32.1867	2.42	59.4595	1.84733	0.34	1.058	71.99	1.34	10.89	4.32
157	2	58	3	24.69	5.91	0.81	6.12	1.33	21.732	4.38	71.5686	3.29323	0.41	1.371	117.11	1.8	12.03	4.03	0.5
158	2	33	1	20.4	4.81	0.98	4.58	1.52	33.1878	2.5	54.5852	1.64474	0.56	1.751	96.77	1.58	13.1	5.11
159	2	35	2	22.37	4.67	0.98	4.42	1.62	36.6516	2.28	51.5837	1.40741	0.52
160	2	51	2	21.42	5.29	1.09	4.04	1.16	28.7129	2.27	56.1881	1.9569	0.61	1.229	90.87	1.4	11.04	4.32	2.24
161	2	46	2		6.26	1.04	4.75	1.35	28.4211	2.51	52.8421	1.85926	0.89
162	2	45	2	19.6	4.88	0.88	5.35	1.87	34.9533	3.23	60.3738	1.72727	0.25	0.701	79.92	1.4	11.62	4.22	0.68
163	2	59	3	25.21	5.16	0.91	5.78	1.64	28.3737	3.47	60.0346	2.11585	0.67	0.842	95.94	1.46	11.2	4.85
164	2	41	2	20	4.77	1.11	4.2	1.38	32.8571	2.26	53.8095	1.63768	0.56	1.174	111.22	1.57	13.48	4.29
165	2	38	2		4.86	0.84	4.42	1.78	40.2715	2.23	50.4525	1.25281	0.41	3.241	127.33	1.81	12.45	4.39	0.5	3.8
166	2	58	3	23.3	5.01	0.93	5.19	1.47	28.3237	3.19	61.4644	2.17007	0.53	4.162	69.06	1.06	10.24	4.47	0.5
167	2	52	2	21.67	5.09	1.05	5.72	1.54	26.9231	3.58	62.5874	2.32468	0.6	1.08	104.28	1.3
168	2	42	2	20.16	5.29	0.88	4.44	1.42	31.982	2.63	59.2342	1.85211	0.39
169	2	60	3	21.9	4.56	0.91	4.64	1.46	31.4655	2.31	49.7845	1.58219	0.87	2.317	102.41	1.41	12.67	3.39	39.84
170	2	53	2	21.64	5.06	1	5.32	2.16	40.6015	2.74	51.5038	1.26852	0.42
171	2	52	2	20.21	4.56	0.89	4.07	1.53	37.5921	2.06	50.6143	1.34641	0.48	1.5	117.2	1.72	11.82	3.5	422.75
172	2	56	3	19.07	4.49	0.89	4.34	2.02	46.5438	2.04	47.0046	1.0099	0.28	4.532	92.24	1.61	13.34	4.71	0.5
173	2	59	3	20.7	5.25	1.01	5.1	1.99	39.0196	2.76	54.1176	1.38693	0.35	1.591	117.67	1.79	15.28	4.71	0.5
174	2	55	2	19.44	4.42	1.05	4.78	1.62	33.8912	2.66	55.6485	1.64198	0.5	1.74	116.89	1.56	14.59	4.72	0.5
175	2	43	2	20.78	5	0.7	4.58	1.25	27.2926	2.84	62.0087	2.272	0.49	1.881	113.8	1.9	12.07	4.29	0.5
176	2	33	1	19.26	4.34	0.85	4.35	1.83	42.069	2.13	48.9655	1.16393	0.39
177	2	61	3	26.58	4.96	0.88	4.29	1.1	25.641	2.83	65.9674	2.57273	0.36	18.348	70.9	1.41	9.26	3.6	660.28	345.5
178	2	65	3	22.55	5.67	0.94	5.24	1.48	28.2443	3.31	63.1679	2.23649	0.45	2.851	119.4	1.45	13.79	5.07
179	2	59	3	28.22	5.46	1.06	4.09	1.16	28.3619	2.33	56.9682	2.00862	0.6	2.145	86.33	1.69	10.51	4.9	416.09
180	2	57	3	20.77	4.45	0.93	4.25	1.26	29.6471	2.37	55.7647	1.88095	0.62
181	2	59	3	20.11	4.93	0.81	3.82	0.96	25.1309	2.41	63.089	2.51042	0.45	1.641	116.76	1.88	13.78	4.65	1.11
182	2	39	2	17.6	5.24	0.87	4.15	1.83	44.0964	2.05	49.3976	1.12022	0.27	0.862	105.66	1.57	12.55	4.98	0.5
183	2	64	3	22.5	5.47	1.09	4.41	1.7	38.5488	1.97	44.6712	1.15882	0.74	0.861	99.41	1.38	12.39	4.15	0.96
184	2	64	3	22.02	4.28	0.91	3.44	1.15	33.4302	1.82	52.907	1.58261	0.47	1.649	101.26	1.71	13.82	5.21	0.5
185	2	43	2	21.95	3.96	0.88	3.89	1.22	31.3625	2.14	55.0129	1.7541	0.53	1.484	91.46	1.61	12.96	4.7	0.5
186	2	58	3	26.67	4.38	0.85	3.27	1.43	43.7309	1.44	44.0367	1.00699	0.4
187	2	46	2	24.12	4.53	0.73	4.34	1.33	30.6452	2.77	63.8249	2.08271	0.24	0.642	114.58	1.52	12.72	3.67	0.5
188	2	68	3	23.5	5.17	1.13	4.94	1.61	32.5911	2.99	60.5263	1.85714	0.34
189	2	40	2	18.32	4.35	0.95	4.83	1.82	37.6812	2.58	53.4161	1.41758	0.43	2.06	87.26	1.2
190	2	25	1	17.71	4.34	0.93	4.69	1.55	33.049	2.5	53.3049	1.6129	0.64
191	2	51	2	17.67	4.46	0.91	4.11	1.76	42.8224	1.8	43.7956	1.02273	0.55
192	2	36	2	19.39	4.54	0.92	3.83	1.29	33.6815	1.88	49.0862	1.45736	0.66	1.697	77.3	1.26	10.37	3.99	0.5
193	2	65	3	22.5	5.32	1.12	5.44	1.43	26.2868	3.36	61.7647	2.34965	0.65
194	2	31	1	17.66	4	0.74	5.07	2.27	44.7732	2.47	48.7179	1.08811	0.33
195	2	31	1	34.05	4.64	0.71	4.37	1.35	30.8924	2.78	63.6156	2.05926	0.24
196	2	51	2	21.05	5.33	0.94	5.11	1.87	36.5949	2.83	55.3816	1.51337	0.41
197	2	58	3		4.73	0.91	5.26	1.46	27.7567	3.2	60.8365	2.19178	0.6
198	2	37	2	25.96	4.7	0.76	4.61	1.2	26.0304	3.02	65.5098	2.51667	0.39
199	2	53	2	29.58	4.41	0.77	4.53	1.67	36.8653	2.5	55.1876	1.49701	0.36	1.923	88.2	1.35	13.37	4.99
200	2	61	3	19.96	4.25	0.92	5.14	1.54	29.9611	3.42	66.537	2.22078	0.18	1.798	81.51	1.3	13.18	4.08
201	2	40	2	19.36	4.86	0.86	3.52	1.28	36.3636	1.73	49.1477	1.35156	0.51	1.693	85.35	1.27	13.12	4.9	0.66
202	2	69	3	22.64	4.34	0.76	5.9	1.64	27.7966	3.81	64.5763	2.32317	0.45	1.492	143.11	1.39	16.19	5.58	0.5
203	2	25	1	18.71	5.1	0.83	3.9	1.36	34.8718	2.21	56.6667	1.625	0.33	2.658	103.69	1.56	14.11	5.21	0.5	0.67
204	2	32	1	21.23	4.94	0.98	4.66	1.14	24.4635	2.98	63.9485	2.61404	0.54	2.844	101.08	1.36	12.47	4.5
205	2	39	2	20.71	6	0.7	4.88	1.62	33.1967	2.81	57.582	1.73457	0.45
206	2	39	2	19.28	4.59	0.81	3.2	1.5	46.875	1.38	43.125	0.92	0.32	0.299	81.22	1.24
207	2	56	3	20.7	4.62	0.74	5.25	1.7	32.381	3.43	65.3333	2.01765	0.12
208	2	38	2	18.91	4.78	1	4.43	1.32	29.7968	2.42	54.6275	1.83333	0.69
209	2	37	2	24.04	4.97	0.69	4.35	1.47	33.7931	2.43	55.8621	1.65306	0.45	1.356	103.53	1.7	12.48	4.65	0.5
210	2	42	2		5.18	0.69	4.24	1.76	41.5094	2.17	51.1792	1.23295	0.31
211	2	48	2	16.69	4.92	1.09	3.7	1.54	41.6216	1.75	47.2973	1.13636	0.41
212	2	48	2	18.29	5.06	0.95	4.73	1.64	34.6723	2.65	56.0254	1.61585	0.44	2.568	76.52	1.13	13.54	3.86	0.68
213	2	38	2	16.36	5.19	0.77	4.19	1.52	36.2768	2.12	50.5967	1.39474	0.55	2.5	105.27	1.47	13.67	4.37
214	2	55	2	25.63	4.46	0.92	3.68	1.39	37.7717	1.85	50.2717	1.33094	0.44	1.227	108.17	1.77	12.93	5.28	2.55
215	2	40	2	19.94	4.5	0.81	3.55	1.44	40.5634	1.7	47.8873	1.18056	0.41	1.714	82.7	1.61	13.73	4.48
216	2	57	3	22.27	5.44	0.7	5.22	1.74	33.3333	3.17	60.728	1.82184	0.31	3.26	116.69	1.43	13.95	4.48	0.5
217	2	44	2	26.12	4.4	0.96	3.54	1.12	31.6384	2.11	59.6045	1.88393	0.31	1.482	81.29	1.22	11.43	3.46	0.58
218	2	55	2	25.14	4.45	0.82	4.18	1.11	26.555	2.54	60.7656	2.28829	0.53	0.736	133.86	1.78	14.18	4.72	0.63
219	2	56	3	22.79	5.14	0.75	4.36	1.31	30.0459	2.83	64.9083	2.16031	0.22	2.32	106.61	1.55	12.39	4.27	55.19
220	2	56	3	24.08	4.8	0.91	4.98	1.62	32.5301	2.94	59.0361	1.81481	0.42
221	2	40	2	22.67	4.42	0.93	4.65	1.03	22.1505	3.15	67.7419	3.05825	0.47	1.327	112.2	1.37	13.18	4.77	0.5	0.57
222	2	35	2	20.6	4.31	0.78	4.54	1.26	27.7533	2.82	62.1145	2.2381	0.46	1.904	96.4	1.52	13.17	4.23
223	2	35	2	22.09	4.86	0.9	4.12	1.17	28.3981	2.66	64.5631	2.2735	0.29
224	2	53	2	26.42	5.05	0.83	4.69	1.3	27.7186	2.83	60.3412	2.17692	0.56	1.902	92	0.99	14.1	4.49	0.66
225	2	42	2	19.14	3.88	1.05	4.11	1.28	31.1436	2.4	58.3942	1.875	0.43	2.032	105.84	1.24	13.09	4.24	0.6	2.9
226	2	44	2	29.44	4.63	0.81	4.19	1.27	30.3103	2.3	54.8926	1.81102	0.62
227	2	38	2	20.81	4.56	0.73	4.26	1.45	34.0376	2.2	51.6432	1.51724	0.61	0.926	130.65	1.39	13.87	4.08	0.5
228	2	55	2	25	5.34	0.69	4.84	1.89	39.0496	2.61	53.9256	1.38095	0.34	1.177	98.78	1.71	12.18	5.71	0.5	1.62
229	2	30	1	19.14	4.88	0.78	4.3	1.62	37.6744	2.22	51.6279	1.37037	0.46
230	2	37	2	21.35	4.53	0.74	4.13	1.24	30.0242	2.36	57.1429	1.90323	0.53	0.964	117.89	1.6	14.18	4.65	0.5	0.5
231	2	32	1	19.2	4.81	0.62	4.17	1.85	44.3645	1.98	47.482	1.07027	0.34	2.084	96.28	1.64	11.46	4.97
232	2	36	2	20.16	4.56	0.79	3.65	1.75	47.9452	1.79	49.0411	1.02286	0.11	0.911	76.92	1.2	11.33	3.97	0.5
233	2	26	1	18.83	4.61	0.67	4.3	1.96	45.5814	1.71	39.7674	0.872449	0.63	1.482	98.28	1.61	17.63	5.18	0.5
234	2	61	3	24.35	4.67	0.77	5.81	1.73	29.7762	3.55	61.1015	2.05202	0.53	0.874	98.75	1.66	12.31	5.08	0.52
235	2	54	2	24.36	5.81	0.69	3.39	1.3	38.3481	1.86	54.8673	1.43077	0.23
236	2	58	3	21.41	5.51	0.62	3.4	1.48	43.5294	1.6	47.0588	1.08108	0.32	1.177	89.51	1.47	12.44	3.83	2.14
237	2	37	2	18.98	4.47	0.77	4.31	1.36	31.5545	2.39	55.4524	1.75735	0.56	2.869	116.69	1.48	15.44	4.46
238	2	28	1	19.81	4.56	0.91	6.69	2.25	33.6323	3.97	59.3423	1.76444	0.47
239	2	31	1	19.77	5.06	0.73	4.26	1.4	32.8638	2.5	58.6854	1.78571	0.36	1.812	101	1.83
240	2	49	2	23.17	4.44	0.67	3.72	1.75	47.043	1.73	46.5054	0.988571	0.24	1.755	101.64	1.88	12.66	5.4	0.5	2.29
241	2	37	2		4.78	0.59	4.24	1.38	32.5472	2.59	61.0849	1.87681	0.27	1.093	111.82	1.52
242	2	26	1	25.55	4.68	0.71	5.47	1.76	32.1755	3.11	56.8556	1.76705	0.6
243	2	28	1	18.95	4.25	0.72	4.12	2.01	48.7864	1.86	45.1456	0.925373	0.25	1.769	86.85	1.34
244	2	62	3	19.32	4.83	0.81	5.41	1.8	33.2717	3.33	61.5527	1.85	0.28
245	2	40	2	21.93	4.95	0.75	3.96	1.22	30.8081	2.27	57.3232	1.86066	0.47
246	2	29	1	21.17	5.3	0.69	4.56	1.85	40.5702	2.27	49.7807	1.22703	0.44
247	2	38	2	22.58	4.39	0.71	5.14	1.83	35.6031	3.01	58.5603	1.64481	0.3	1.679	79.63	1.13	11.02	3.96	0.5
248	2	38	2	18.96	4.68	0.78	4.2	1.81	43.0952	2.05	48.8095	1.1326	0.34	2.212	93.83	1.19
249	2	40	2	19.93	4.61	0.72	3.97	1.44	36.272	2.04	51.3854	1.41667	0.49	1.202	140.59	1.58	16.93	5.02
250	2	56	3	26.42	4.32	0.92	3.96	1.49	37.6263	1.88	47.4747	1.26174	0.59	2.212	135	1.45	15.25	4.52	0.5	1.07
251	2	38	2	21.26	4.36	0.82	7.07	1.25	17.6803	5.21	73.6917	4.168	0.61
252	2	64	3	25.79	4.87	0.86	4.84	1.62	33.4711	2.75	56.8182	1.69753	0.47
253	2	44	2	22.07	4.34	0.6	4.29	1.37	31.9347	2.56	59.6737	1.86861	0.36	0.795	90.43	1.62	9.81	4.46	1.11
254	2	45	2	21.87	4.85	0.77	4.2	1.88	44.7619	1.78	42.381	0.946809	0.54	1.299	80.76	1.36	11.56	4.51
255	2	49	2	20.02	4.26	0.73	4.73	1.73	36.5751	2.24	47.3573	1.2948	0.76
256	2	56	3	24.64	5.92	0.66	5.04	2.41	47.8175	2.6	51.5873	1.07884	0.03	1.648	122.04	1.29	13.53	3.53	0.7
257	2	51	2	22.69	4.99	0.79	4.09	1.25	30.5623	2.18	53.3007	1.744	0.66	1.298	69.26	0.9	11.13	3.78	0.5
258	2	43	2	18.87	4.63	0.66	3.47	1.25	36.0231	1.68	48.415	1.344	0.54	1.683	100.2	1.16	13.08	3.73	1000
259	2	47	2	21.4	4.47	0.68	4.67	1.57	33.6188	2.7	57.8158	1.71975	0.4	1.014	120.14	1.51	14.17	4.84	0.5	3.52
260	2	57	3	19.84	5.11	0.67	3.3	0.97	29.3939	2.06	62.4242	2.12371	0.27
261	2	30	1	21.79	4.53	0.66	3.07	1.14	37.1336	1.65	53.7459	1.44737	0.28	5.219	109.94	1.56
262	2	47	2	19.81	5.07	0.72	3.96	1.72	43.4343	1.89	47.7273	1.09884	0.35	1.438	85.79	1.63
263	2	48	2	20.24	5.1	0.58	3.09	1.25	40.4531	1.57	50.8091	1.256	0.27	1.79	106.35	1.14	12.99	3.44	115.65
264	2	50	2		5.09	0.6	4.59	2.24	48.8017	2.18	47.4946	0.973214	0.17
265	2	55	2	24.23	4.49	0.62	4.17	1.78	42.6859	2.25	53.9568	1.26404	0.14	0.976	102.17	1.7	12.48	4.86	0.86
266	2	45	2		5.2	0.79	4.22	1.82	43.128	2.33	55.2133	1.28022	0.07
267	2	42	2	17.46	5.01	0.65	4.44	1.65	37.1622	2.26	50.9009	1.3697	0.53	1.023	118.44	1.72	16.44	5.09
268	2	49	2	22.31	4.61	0.57	3.32	1.29	38.8554	1.95	58.7349	1.51163	0.08
269	2	36	2	22.48	4.83	0.62	4.42	1.54	34.8416	2.63	59.5023	1.70779	0.25
270	2	38	2	20.23	4.81	0.62	4.53	1.87	41.2804	2.39	52.7594	1.27807	0.27	1.527	126.39	1.74	16.31	5.55
271	2	29	1	22.39	4.51	0.73	4.55	0.98	21.5385	3.17	69.6703	3.23469	0.4	2.263	98.89	1.32	13.04	4.39	0.5	1.22
272	2	51	2		4.34	0.76	4.82	1.61	33.4025	2.74	56.8465	1.70186	0.47	1.8	88.52	1.44	11.51	4.27	0.5
273	2	51	2	22.13	5.73	0.53	3.7	1.51	40.8108	1.8	48.6486	1.19205	0.39	0.575	73	1.32	11.42	4.04	0.97
274	2	42	2	18.09	4.42	0.61	3.2	1.48	46.25	1.49	46.5625	1.00676	0.23
275	2	47	2	24.78	4.74	0.65	3.61	1.6	44.3213	1.74	48.1994	1.0875	0.27	2.539	92.63	1.52	11.01	3.91	0.5	3.65
276	2	26	1	21.1	4.46	0.66	2.72	1.33	48.8971	1.25	45.9559	0.93985	0.14
277	2	49	2	22.17	5.02	0.74	4.81	1.21	25.1559	2.9	60.2911	2.39669	0.7
278	2	31	1	19.19	4.75	0.46	5.29	1.85	34.9716	3.21	60.6805	1.73514	0.23
279	2	41	2	18.46	4.03	0.56	3.55	1.43	40.2817	1.75	49.2958	1.22378	0.37	1.801	99.48	1.48	13.54	5.58	0.5
280	2	66	3	17.48	4.33	0.66	3.79	1.67	44.0633	1.66	43.7995	0.994012	0.46	2.447	100.06	1.6	12.91	3.94	34.72
281	2	46	2	24.41	5.02	0.7	4.21	1.66	39.4299	2.21	52.4941	1.33133	0.34	0.761	75.66	1.04	11.16	2.84	0.5
282	2	50	2	22.48	4.96	0.58	4.11	1.45	35.2798	2.26	54.9878	1.55862	0.4	0.787	79.57	1.08	10.65	3.45	0.5	0.31
283	2	42	2	24.04	4.76	0.57	4.01	1.4	34.9127	2.11	52.6185	1.50714	0.5	1.891	89.23	1.42	12.65	4.04	0.5
284	2	30	1	16.66	4.27	0.57	4.07	1.95	47.9115	1.82	44.7174	0.933333	0.3	3.243	105.97	1.58
285	2	68	3	22.7	4.65	0.65	4.23	1.69	39.9527	2.29	54.1371	1.35503	0.25	1.613	99	1.52	11.8	4.36	0.5
286	2	31	1		5.03	0.63	4.57	1.84	40.2626	2.49	54.4858	1.35326	0.24
287	2	51	2	20.85	3.87	0.58	3.33	1.39	41.7417	1.78	53.4535	1.28058	0.16	4.628	105.12	1.32	14.54	4.34	0.5
288	2	38	2	22.96	4.73	0.58	3.25	1.4	43.0769	1.75	53.8462	1.25	0.1	1.605	84.94	1.41	13.1	4.21	0.5	0.91
289	2	52	2	21.02	4.85	0.53	4.7	1.84	39.1489	2.45	52.1277	1.33152	0.41	1.794	103.7	1.49	13.91	4.34	0.5
290	2	36	2	20.82	4.13	0.52	3.39	1.53	45.1327	1.65	48.6726	1.07843	0.21	1.749	92.95	1.24	12.56	3.92	0.5	0.73
291	2	51	2	22.52	4.65	0.65	4.67	1.57	33.6188	2.79	59.743	1.77707	0.31	1.032	100.7	1.23	12.13	3.86
292	2	59	3	23.24	4.24	0.83	4.26	1.03	24.1784	2.59	60.7981	2.51456	0.64
293	2	51	2	21.31	4.23	0.58	6.35	1.88	29.6063	3.75	59.0551	1.99468	0.72	1.473	115.05	1.48	12.38	4.4	1.63	0.64
294	2	43	2	19.61	4.1	0.54	3.92	1.37	34.949	2.11	53.8265	1.54015	0.44
295	2	32	1	18.81	4.81	0.53	3.91	1.55	39.6419	2	51.1509	1.29032	0.36	3.605	101	1.54	12.45	4.95	0.5	0.57
296	2	42	2	21.12	4.29	0.65	4.75	1.99	41.8947	2.4	50.5263	1.20603	0.36	1.686	82.55	1.04	11.38	3.66	0.5	1.24
297	2	41	2	23.28	4.81	0.63	5.29	1.7	32.1361	3.09	58.4121	1.81765	0.5	1.339	107.13	1.39	12.62	4.33	0.5
298	2	56	3	20.54	4.61	0.6	4.23	1.82	43.026	2.13	50.3546	1.17033	0.28	1.049	87.96	1.42
299	2	69	3	22.99	4.96	0.74	3.75	1.39	37.0667	1.83	48.8	1.31655	0.53
300	2	66	3	25.79	4.66	0.57	4.42	1.2	27.1493	2.74	61.991	2.28333	0.48	1.066	128.34	1.42	13.88	4.8
301	2	28	1	19.6	4.88	0.53	3.22	1.27	39.441	1.61	50	1.26772	0.34
302	2	38	2	23.01	4.81	0.53	4.53	1.71	37.7483	2.55	56.2914	1.49123	0.27	0.562	125.57	1.36	15.54	4.62
303	2	51	2	21.56	5.02	0.52	3.86	1.63	42.228	1.94	50.2591	1.19018	0.29	0.495	88.06	1.18	12.63	3.59	0.5
304	2	32	1	20.37	4.96	0.62	3.6	1.24	34.4444	2.03	56.3889	1.6371	0.33	0.661	95.52	1.63	12.01	4.56	0.73
305	2	33	1	22.27	4.57	0.59	3.86	1.65	42.7461	1.8	46.6321	1.09091	0.41	0.973	82.66	1.27	11.83	3.63
306	2	42	2	18.82	4.81	0.55	4.52	1.83	40.4867	2.49	55.0885	1.36066	0.2	0.996	103.15	1.53
307	2	53	2		4.83	0.54	4.9	1.68	34.2857	2.98	60.8163	1.77381	0.24	1.79	96.17	1.47
308	2	44	2	19.52	4.21	0.45	3.4	1.43	42.0588	1.59	46.7647	1.11189	0.38	2.104	99.36	1.55	12.68	5.21	0.5
309	2	40	2	18.95	4.15	0.68	4.97	1.51	30.3823	3.06	61.5694	2.02649	0.4	0.832	92.25	1.11	13.12	4.05
310	2	35	2	20.96	4.87	0.51	3.49	1.24	35.5301	1.91	54.7278	1.54032	0.34
311	2	33	1	21.53	5.1	0.49	3.94	1.73	43.9086	2	50.7614	1.15607	0.21	0.89	45.02	0.88	9.7	3.95	0.95	0.42
312	2	35	2	19.26	5.02	0.55	4.51	2	44.3459	2.21	49.0022	1.105	0.3	2.8	85.71	1.1	13.06	4.48
313	2	30	1	19.64	4.32	0.59	4.21	1.99	47.2684	1.89	44.8931	0.949749	0.33	1.339	115.94	1.33
314	2	38	2		4.57	0.51	4	1.62	40.5	2.2	55	1.35802	0.18
315	2	39	2	22.52	4.57	0.45	3.45	1.61	46.6667	1.73	50.1449	1.07453	0.11	2.094	69.2	1.42	11.61	4.68
316	2	28	1	19.83	4.8	0.38	3.73	1.53	41.0188	2.11	56.5684	1.37908	0.09	1.379	100.88	1.74	14.55	4.84	0.5
317	2	28	1	20.53	4.29	0.53	4.13	1	24.2131	2.81	68.0387	2.81	0.32
318	2	28	1	20.32	3.87	0.53	3.68	1.59	43.2065	1.71	46.4674	1.07547	0.38	3.505	112.01	1.34	14.59	4.71	0.74
319	2	31	1	18.06	5.12	0.49	3.56	1.68	47.191	1.49	41.8539	0.886905	0.39
320	2	35	2	23.49	5.41	0.57	3.57	1.23	34.4538	2.03	56.8627	1.65041	0.31	0.776	89.83	1.29
321	2	41	2	19.23	4.35	0.66	3.22	1.37	42.5466	1.55	48.1366	1.13139	0.3	2.007	89.93	1.37	13.15	4.37	27.56	1.69
322	2	49	2	19.26	4	0.6	4.32	1.92	44.4444	2.03	46.9907	1.05729	0.37	3.522	67.95	1.2	11.03	4.1	0.67
323	2	49	2	23.45	4.99	0.4	4.4	1.82	41.3636	2.21	50.2273	1.21429	0.37	1.234	78.34	1.64	10.76	4.25	0.95
324	2	44	2	23.86	5.09	0.4	3.29	1.08	32.8267	1.86	56.535	1.72222	0.35	2.218	98.8	1.33	12.77	4.11	0.5	1.77
325	2	30	1		4.97	0.59	4.24	1.76	41.5094	2.25	53.066	1.27841	0.23
326	2	38	2	17.24	4.29	0.49	3.77	1.91	50.6631	1.53	40.5836	0.801047	0.33	1.665	79.37	1.15
327	2	43	2	17.31	5.13	0.56	4.14	1.73	41.7874	1.98	47.8261	1.14451	0.43	0.594	102.8	1.36	15.03	4.8	0.5	1.59
328	2	22	1	20.69	5.21	0.52	5.2	1.8	34.6154	2.91	55.9615	1.61667	0.49
329	2	30	1	21.72	4.28	0.48	3.43	1.31	38.1924	1.91	55.6851	1.45802	0.21	2.24	120.84	1.67	13.67	4.92	33.87	249.73
330	2	45	2	22.67	4.85	0.5	4.19	1.83	43.6754	2.01	47.9714	1.09836	0.35
331	2	47	2	22.81	4.06	0.53	4.11	1.78	43.309	2.07	50.365	1.16292	0.26	1.921	63.13	1.2	11.65	3.82	0.5
332	2	36	2	19.67	4.2	0.42	4.63	1.44	31.1015	2.72	58.7473	1.88889	0.47
333	2	29	1	18.65	4.4	0.39	3.5	1.62	46.2857	1.67	47.7143	1.03086	0.21	0.919	98.15	1.63	14.32	5	0.5	1.81
334	2	32	1	21.78	4.71	0.49	3.8	1.63	42.8947	1.87	49.2105	1.14724	0.3
335	2	29	1	19.68	4.11	0.37	2.9	1.53	52.7586	1.2	41.3793	0.784314	0.17	2.274	112.82	1.46	13.39	3.92	160.17	251.84
336	2	66	3	26.86	5.95	0.55	4.59	1.51	32.8976	2.67	58.1699	1.76821	0.41	1.77	95.76	1.63
337	2	27	1	18.43	4.49	0.33	3.43	1.93	56.2682	1.31	38.1924	0.678756	0.19	1.269	66	1.39	14.2	4.66	0.5
338	2	47	2		6.11	0.48	3.43	1.71	49.8542	1.37	39.9417	0.80117	0.35	2.896	66.69	0.94
339	2	54	2	21.62	4.7	0.47	3.11	1.84	59.164	1.13	36.3344	0.61413	0.14
340	2	33	1	19.32	4.66	0.36	2.94	1.31	44.5578	1.51	51.3605	1.15267	0.12	1.022	73.37	1.33	10.81	4.6
341	2	48	2		4.65	0.4	3.83	1.97	51.436	1.67	43.6031	0.847716	0.19	2.3	99.52	1.21
342	2	53	2	18.43	5	0.45	5.9	2.3	38.9831	3.06	51.8644	1.33043	0.54	1.299	94.77	1.08	11.41	2.63	4.53
343	2	32	1	17.2	4.87	0.4	3.16	1.41	44.6203	1.41	44.6203	1	0.34	0.788	102.03	1.18	13.54	3.78	0.5
344	2	32	1	16.19	4.87	0.44	3.99	1.78	44.6115	1.75	43.8596	0.983146	0.46
345	2	35	2	18.17	4.72	0.41	3.62	1.91	52.7624	1.46	40.3315	0.764398	0.25	2.355	73.32	1.28	11.19	4.08	9.32	22.21
346	1	36	2	20.94	4.89	0.74	4.5	1.79	39.7778	2.21	49.1111	1.23464	0.5
347	1	44	2		4.68	2.44	4.5	0.84	18.6667	2.55	56.6667	3.03571	1.11	0.701	114.29	1.8	13.54	4.8
348	1	39	2	26.25	5.17	1.15	3.64	0.73	20.0549	2.39	65.6593	3.27397	0.52	1.806	113.25	1.53
349	1	58	3		4.43	1.88	4.28	0.99	23.1308	2.49	58.1776	2.51515	0.8	0.269	105.09	1.6
350	1	67	3	23.62	5.45	1.54	6	1.2	20	4.18	69.6667	3.48333	0.62	2.367	119.41	1.66	11.92	4.22	0.5
351	1	69	3	25.87	5.02	1.96	5.02	0.97	19.3227	3.2	63.745	3.29897	0.85	1.515	101.9	1.81	12.19	4.98	0.5
352	1	47	2	23.46	4.68	1.28	4.53	1.19	26.2693	2.66	58.7196	2.23529	0.68	0.647	105.22	1.87	13.38	5.01	0.5
353	1	43	2	29.93	5.79	3.08	4.15	0.85	20.4819	2.12	51.0843	2.49412	1.18	1.864	80.46	1.24	12.65	3.83	0.5
354	1	39	2	28.86	4.98	1.01	4.81	1.15	23.9085	3.28	68.1913	2.85217	0.38
355	1	35	2	24.16	4.23	1.67	4.92	1.05	21.3415	3.1	63.0081	2.95238	0.77
356	1	40	2	28.14	5.09	5.35	4.58	0.96	20.9607	2.11	46.0699	2.19792	1.51	1.256	97.88	1.68	12.81	4.85	0.5
357	1	55	2	26.83	4.35	2.95	5.12	1	19.5312	3.08	60.1562	3.08	1.04	1.373	106.83	1.49	14.23	4.49	0.61
358	1	69	3	24.73	5.46	1.67	5.21	1.1	21.1132	3.41	65.4511	3.1	0.7	1.443	111.98	1.74	14.3	4.72	0.5
359	1	37	2	19.66	4.65	0.89	5.32	1.97	37.0301	3.11	58.4586	1.57868	0.24
360	1	35	2	25.81	4.89	2.43	4.62	0.68	14.7186	2.98	64.5022	4.38235	0.96
361	1	41	2	26.53	4.59	1.02	4.12	1.1	26.699	2.57	62.3786	2.33636	0.45	5.118	109.12	1.33	14.2	3.36	0.5	0.43
362	1	43	2	24.26	4.98	0.99	4.06	1.29	31.7734	2.41	59.3596	1.86822	0.36	1.087	92.34	1.81	12.34	4.84	0.94
363	1	29	1	28.05	5.78	2.1	4.55	1.18	25.9341	2.62	57.5824	2.22034	0.75	2.15	111.4	1.73	15.26	5.86	0.5
364	1	49	2	25.17	4.78	1.42	4.57	1.24	27.1335	2.9	63.4573	2.33871	0.43	0.887	100.96	2.05	13.49	5.46	0.5	0.52
365	1	50	2	23.56	5.59	3.01	6.53	1.08	16.5391	4.31	66.0031	3.99074	1.14	1.793	70.56	1.61	11.19	5.43	0.5	0.9
366	1	40	2	26.48	4.22	2.09	5.2	1.28	24.6154	3.17	60.9615	2.47656	0.75	1.617	93.86	1.71	12.92	4.39	0.5
367	1	37	2	30.56	5.78	1.73	5.9	0.87	14.7458	4.24	71.8644	4.87356	0.79	1.152	113.65	1.62	13.01	4.99	0.5	0.87
368	1	40	2	21.72	4.64	1.37	4.19	0.98	23.389	2.63	62.7685	2.68367	0.58	0.872	97.93	1.89	12.84	5.77	352.01
369	1	37	2	23.48	4.82	1.03	3.71	1.14	30.7278	2.13	57.4124	1.86842	0.44	0.843	105.75	1.57	13.09	4.98	0.58	1.25
370	1	40	2	20.55	5.19	1	3.97	1.53	38.539	1.9	47.8589	1.24183	0.54
371	1	41	2	26.67	4.78	0.94	4.64	1.37	29.5259	2.85	61.4224	2.08029	0.42
372	1	44	2	21.79	4.3	0.51	5.64	2.02	35.8156	3.21	56.9149	1.58911	0.41
373	1	48	2	18.82	4.56	0.86	3.74	1.39	37.1658	2.01	53.7433	1.44604	0.34
374	1	38	2	26.79	5	0.57	3.74	1.14	30.4813	2.1	56.1497	1.84211	0.5
375	1	37	2	23.79	5.25	1.14	4.11	1.24	30.1703	2.43	59.1241	1.95968	0.44	0.857	88.41	1.51
376	1	28	1	24.06	4.67	0.41	4.23	1.59	37.5887	2.36	55.792	1.48428	0.28	3.81	86.01	1.63	13.09	4.48	0.5
377	1	38	2	24.68	5.08	1.16	4.3	1.08	25.1163	2.61	60.6977	2.41667	0.61	1.195	93.16	2.05	13.26	5.06	0.5
378	1	49	2	27.99	5.08	1.75	3.82	0.95	24.8691	2.02	52.8796	2.12632	0.85	1.734	79.21	1.45	12.34	4.13	0.87
379	1	40	2	23.05	5.63	0.66	5.84	1.67	28.5959	3.48	59.589	2.08383	0.69	1.535	83.91	1.62	13.12	4.78	0.5
380	1	48	2	23.98	5.48	0.68	4.29	1.35	31.4685	2.43	56.6434	1.8	0.51	2.616	107.48	1.62	13.35	4.53
381	1	56	3	23.19	4.36	3.4	5.23	1.05	20.0765	2.99	57.1702	2.84762	1.19	1.516	98.39	1.59	13.37	4.91	0.58	2.38
382	1	58	3	22.59	5.21	1.15	6.06	1.79	29.538	3.34	55.1155	1.86592	0.93	3.445	74.84	1.39	12.59	5.01	95.67	42.5
383	1	57	3	22.6	6.32	2.17	4.78	0.96	20.0837	2.89	60.4603	3.01042	0.93	2.29	84.91	1.8	12.86	4.76	0.5	0.5
384	1	44	2	29.51	5.08	3.27	5.64	0.89	15.7801	3.36	59.5745	3.77528	1.39
385	1	58	3	22.19	5.21	2.2	5.39	0.88	16.3265	3.45	64.0074	3.92045	1.06	2.886	83.9	1.86	12.41	5.85	0.5
386	1	47	2	20.59	4.45	0.73	4.13	1.02	24.6973	2.55	61.7433	2.5	0.56	1.842	100.03	1.59	13.56	4.91	0.5
387	1	39	2	29.07	4.28	1.37	5.9	1.32	22.3729	3.53	59.8305	2.67424	1.05	1.477	111.32	1.7	14.27	5.46	0.5
388	1	46	2	25.49	5.46	1.69	4.56	1.12	24.5614	2.72	59.6491	2.42857	0.72	1.393	97.88	1.6	16.25	4.74	0.5
389	1	49	2	26.89	4.25	1.37	3.42	1.05	30.7018	1.75	51.1696	1.66667	0.62	1.641	100.36	1.62
390	1	58	3	27.3	5.02	0.86	4.38	1.77	40.411	2.15	49.0868	1.21469	0.46	0.802	105.88	1.46
391	1	44	2	24.86	5.91	1.24	5.02	1.03	20.5179	3.31	65.9363	3.21359	0.68	1.153	82.36	1.33	13.38	4.2	0.5
392	1	58	3	24	4.82	0.92	3.55	1.5	42.2535	1.72	48.4507	1.14667	0.33	0.632	103.27	1.45
393	1	56	3	27.86	5.24	0.96	5.68	1.45	25.5282	3.73	65.669	2.57241	0.5	0.849	76.17	1.73
394	1	50	2		5.23	1.56	5.91	1.12	18.9509	4.17	70.5584	3.72321	0.62	1.089	90.62	1.82	11.7	4.96
395	1	56	3	24.99	4.5	0.69	5.62	1.59	28.2918	3.63	64.5907	2.28302	0.4	1.62	86.23	1.52	13.87	4.5
396	1	70	3	27.8	5.2	1.41	4.72	1.16	24.5763	2.83	59.9576	2.43966	0.73	0.809	99.26	1.79	13.91	4.44	0.65
397	1	57	3	20.45	5.18	1.53	4.81	1.27	26.4033	2.89	60.0832	2.27559	0.65	1.045	89.74	1.46	14.52	4.44	0.5
398	1	58	3	27.68	6.06	2.78	5.05	0.94	18.6139	2.94	58.2178	3.12766	1.17
399	1	57	3	22.59	4.27	0.83	4.97	1.47	29.5775	2.93	58.9537	1.9932	0.57
400	1	59	3	24.55	5.62	1.12	4.5	1.13	25.1111	2.57	57.1111	2.27434	0.8
401	1	60	3	24.08	5.6	1.72	4.06	1.01	24.8768	2.04	50.2463	2.0198	1.01
402	1	58	3	23.77	5.5	0.96	4.09	1.17	28.6064	2.27	55.5012	1.94017	0.65
403	1	58	3	22.07	4.8	0.84	4.39	1.54	35.0797	2.38	54.2141	1.54545	0.47
404	1	57	3	26.47	6.01	1.34	4.62	1.46	31.6017	2.46	53.2468	1.68493	0.7	0.63	73.73	1.38	11.25	4.11	0.83
405	1	56	3	27.85	5.03	0.8	3.65	1	27.3973	2.16	59.1781	2.16	0.49	1.559	87.52	1.32	12.1	4.01	0.5
406	1	54	2	24.78	4.98	0.82	3.79	1.28	33.7731	1.9	50.1319	1.48438	0.61	1.158	85.56	1.31	11.86	4.35	8.61
407	1	53	2	22.38	4.58	0.46	2.97	1.24	41.7508	1.47	49.4949	1.18548	0.26	0.919	96.71	1.71	11.94	5.13	0.5
408	1	64	3	26.7	4.21	1.13	6.3	1.41	22.381	4.26	67.619	3.02128	0.63	1.837	88.82	1.23	13.08	4.31
409	1	55	2	23.71	5.17	1.24	5.25	1.51	28.7619	3.21	61.1429	2.12583	0.53
410	1	60	3	23.6	4.46	1.59	3.39	0.91	26.8437	1.6	47.1976	1.75824	0.88	1.345	84.07	1.42	11.57	4.37	0.5
411	1	58	3	27.34	5.4	2.84	5.25	1.18	22.4762	2.76	52.5714	2.33898	1.31	0.676	87.13	1.29	15.08	4.8	0.5
412	1	63	3	20.61	4.65	1.31	4.07	1.38	33.9066	2.03	49.8771	1.47101	0.66
413	1	62	3	16.36	5.4	0.55	4.68	2.32	49.5726	1.81	38.6752	0.780172	0.55
414	1	56	3	25.54	4.42	1.89	5.48	1.33	24.2701	3.3	60.219	2.4812	0.85	1.696	75.35	1.59	10.78	5.46	1.2	0.73
415	1	52	2	26.63	4.73	3.14	5.08	1	19.685	2.88	56.6929	2.88	1.2	1.531	98.37	1.41	12.51	5.29	0.5
416	1	58	3	23.31	4.88	1.17	4.01	1.16	28.9277	2.24	55.8603	1.93103	0.61	1.185	94.44	1.4
417	1	54	2	26.89	4.82	2.42	5.11	0.97	18.9824	3.14	61.4481	3.23711	1	1.137	124.02	1.48	15.28	4.44	0.5
418	1	60	3	27.6	5.1	0.85	4.46	1.52	34.0807	2.58	57.8475	1.69737	0.36	1.424	115.47	1.38	14.4	3.91	0.5
419	1	62	3	25.37	4.53	1.2	5.39	1.08	20.0371	3.66	67.9035	3.38889	0.65
420	1	51	2	25.25	4.43	1.47	4.67	1.18	25.2677	2.96	63.3833	2.50847	0.53
421	1	57	3	22.6	6.32	2.17	4.78	0.96	20.0837	2.89	60.4603	3.01042	0.93	2.29	84.91	1.8	12.86	4.76	0.5	0.5
422	2	43	2	23.88	5.64	0.72	4.66	1.63	34.9785	2.48	53.2189	1.52147	0.55	1.902	80.87	1.23
423	2	46	2	23.37	5.54	0.92	4.89	1.82	37.2188	2.58	52.7607	1.41758	0.49	2.544	78.33	1.06	11.54	3.54	0.5
424	2	52	2	22.86	5.43	0.99	4.76	1.27	26.6807	2.97	62.395	2.33858	0.52	3.021	68.63	1.34	11.64	4.46	0.66	1.64
425	2	50	2	21.14	4.7	0.59	4.75	1.93	40.6316	2.4	50.5263	1.24352	0.42	3.009	90.08	1.31
426	2	27	1	22.24	4.75	0.78	4.16	1.52	36.5385	2.29	55.0481	1.50658	0.35	1.366	106.29	1.59
427	2	55	2		5.34	0.93	4.57	1.24	27.1335	2.85	62.3632	2.29839	0.48	1.712	92.54	1.45
428	2	55	2	22.83	4.68	0.7	4.38	1.84	42.0091	2.12	48.4018	1.15217	0.42	1.375	90.17	1.16	12.49	3.74
429	2	30	1		5.52	0.79	3.68	1.75	47.5543	1.53	41.5761	0.874286	0.4	0.83	103.36	1.89
430	2	50	2	25.97	4.54	0.69	5.28	1.75	33.1439	2.72	51.5152	1.55429	0.81
431	2	56	3	20.34	4.89	0.73	4.87	1.4	28.7474	3.1	63.655	2.21429	0.37	3.315	104.85	1.64	13.78	4.72
432	2	27	1	18.9	4.78	0.81	4.98	1.98	39.759	2.52	50.6024	1.27273	0.48
433	2	60	3	23.42	5.4	0.62	4.74	1.01	21.308	2.52	53.1646	2.49505	1.21
434	2	60	2	18.74	4.89	0.89	4.59	2	43.573	2.25	49.0196	1.125	0.34	1.198	104.07	1.57	12.67	4.75	0.5
435	2	30	1	21.04	4.62	0.66	4.07	1.63	40.0491	1.99	48.8943	1.22086	0.45	0.645	76.93	1.21
436	2	26	1			0.55	3.69	1.35	36.5854	1.98	53.6585	1.46667	0.36
437	2	28	1	19.96	4.5	0.47	4.22	1.93	45.7346	1.93	45.7346	1	0.36
438	2	27	1	19.81	4.68	0.62	4.78	1.36	28.4519	2.95	61.7155	2.16912	0.47
439	2	60	3	19	5.34	0.86	4.9	1.73	35.3061	2.75	56.1224	1.5896	0.42
440	2	26	1	17.76	5.2	0.54	3.89	1.35	34.7044	2.11	54.2416	1.56296	0.43
441	2	27	1	23.98	4.31	0.6	3.49	1.47	42.1203	1.7	48.7106	1.15646	0.32
442	2	56	3		4.31	0.72	4.6	1.66	36.087	2.59	56.3043	1.56024	0.35	2.934	90.77	1.53	11.99	4.67
443	2	25	1	25.93	5.1	0.7	3.68	1.46	39.6739	1.83	49.7283	1.25342	0.39
444	2	52	2	16.38	5.17	0.68	4.01	1.65	41.1471	1.97	49.1272	1.19394	0.39
445	2	51	2	23.51	5.03	0.61	3.62	0.92	25.4144	2.4	66.2983	2.6087	0.3
446	2	24	1	18.11	5.24	0.63	4.16	1.84	44.2308	2.01	48.3173	1.09239	0.31
447	2	65	2	21.16	4.74	0.75	5.25	1.7	32.381	3.14	59.8095	1.84706	0.41
448	2	27	1	17.92	4.48	0.62	4.56	1.56	34.2105	2.64	57.8947	1.69231	0.36	1.198	117.3	1.53	15.51	3.66	1.07
449	2	52	2	21.41	4.43	0.6	4.27	1.76	41.2178	2.17	50.8197	1.23295	0.34
450	2	26	1	20.67	4.53	0.67	4.92	1.74	35.3659	2.76	56.0976	1.58621	0.42	1.71	84.61	1.24	11.3	3.51	0.83	1.15
451	2	31	1	19.92	5.15	0.81	4.13	1.17	28.3293	2.53	61.2591	2.16239	0.43	1.757	81.78	1.5	12.14	4.88	0.75
452	2	52	2	25.39	5.72	0.76	3.52	1.31	37.2159	1.75	49.7159	1.33588	0.46
453	2	51	2	25.42	4.54	0.83	4.75	1.56	32.8421	2.67	56.2105	1.71154	0.52	1.695	95.88	1.34	12.16	4.1	0.67
454	2	31	1	20.08	5.63	0.52	4.68	1.91	40.812	2.35	50.2137	1.23037	0.42	1.475	94.02	1.52
455	2	30	1	19.75	4.55	0.72	3.86	1.46	37.8238	1.91	49.4819	1.30822	0.49	0.831	102.3	1.43
456	1	43	2	22.71	4.69	0.76	3.47	0.91	26.2248	2.2	63.4006	2.41758	0.36	1.88	102.67	1.97	12.55	5.67	0.5
457	1	46	2	19.2	4.56	0.83	5.15	1.56	30.2913	3.23	62.7184	2.07051	0.36	1.605	105.16	1.68	13.23	4.77	0.73
458	1	39	2	23.53	5.25	0.51	3.53	1.03	29.1785	2.25	63.7394	2.18447	0.25	0.677	87.98	1.55	12.85	5.14	0.5
459	1	46	2	19.35	4.53	0.72	3.5	1.39	39.7143	1.77	50.5714	1.27338	0.34	1.163	99	1.8	12.36	4.85	0.52
460	1	26	1	17.86	4.57	0.81	4.26	1.79	42.0188	2.27	53.2864	1.26816	0.2
461	1	31	1	22.47	4.55	0.64	4.36	1.71	39.2202	2.44	55.9633	1.4269	0.21	2.051	95.62	1.78
462	1	29	1	26.84	4.29	0.71	3.44	0.77	22.3837	2.3	66.8605	2.98701	0.37
463	1	34	1	23.66	4.85	0.74	4.36	1.42	32.5688	2.52	57.7982	1.77465	0.42	1.034	107.15	1.72
464	1	29	1	25.71	5.28	0.86	4.22	1.63	38.6256	2.29	54.2654	1.40491	0.3	2.129	77.04	1.44
465	1	31	1	23.69	4.78	0.81	3.93	1.24	31.5522	2.17	55.2163	1.75	0.52	1.073	98.05	1.29
466	1	31	1		5.36	0.63	3.81	1.29	33.8583	2.16	56.6929	1.67442	0.36	1.397	97.64	1.81
467	1	36	2	20.52	4.67	0.77	2.98	0.91	30.5369	1.76	59.0604	1.93407	0.31	4.369	81.57	1.49
468	1	30	1	23.77	5.32	0.99	4.34	1.41	32.4885	2.44	56.2212	1.7305	0.49	2.651	85.36	1.55
469	1	26	1	23.73	4.8	0.87	5.07	1.47	28.9941	3.27	64.497	2.22449	0.33	1.044	87.65	1.65	14	5.54	0.5	0.75
470	1	33	1	18.12	5.43	0.94	4.31	1.33	30.8585	2.4	55.6845	1.80451	0.58	1.966	85.37	1.51
471	1	48	2		5.51	1.24	4.36	0.96	22.0183	2.76	63.3028	2.875	0.64	0.509	111.32	1.42
472	1	24	1	25.93	4.35	0.86	3.74	1.25	33.4225	2.12	56.6845	1.696	0.37	1.251	89.07	1.57
473	1	26	1	23.73	5.13	0.87	5.07	1.47	28.9941	3.27	64.497	2.22449	0.33	1.044	87.65	1.65	14	5.54	0.5	0.76
474	1	61	3		5.38	0.75	4.44	1.55	34.9099	2.62	59.009	1.69032	0.27	0.795	93.51	1.75
475	1	29	1	25.3	4.84	0.61	4.58	2.02	44.1048	2.27	49.5633	1.12376	0.29	1.253	78.6	1.64
476	1	30	1	27.26	4.65	1.13	4.83	0.89	18.4265	3.11	64.3892	3.49438	0.83	0.987	89.05	1.44	13.61	4.66	0.5
477	1	39	2	22.47	5.22	0.74	3.79	1.51	39.8417	1.8	47.4934	1.19205	0.48	1.043	109.43	1.88	12.75	5.21	0.5
478	1	27	1	20.8	5.45	0.7	3.89	1.34	34.4473	2.24	57.5835	1.67164	0.31
479	1	32	1	24.8	4.32	0.73	3.94	1.19	30.203	2.38	60.4061	2	0.37	1.572	95.69	1.76	11.75	5.57
480	1	39	2	28.86	4.98	1.01	4.81	1.15	23.9085	3.28	68.1913	2.85217	0.38
481	1	61	3	23.09	4.71	0.72	4.14	1.41	34.058	2.19	52.8986	1.55319	0.54
482	1	42	2	25.03	5.44	0.87	4.6	1.27	27.6087	2.72	59.1304	2.14173	0.61
483	1	34	1	24.43	5.34	0.64	4.65	1.76	37.8495	2.72	58.4946	1.54545	0.17	3.294	103.48	1.57
484	1	31	1	24.09	5.13	0.8	4.1	1.26	30.7317	2.44	59.5122	1.93651	0.4	1.208	94.55	1.52	12.71	4.95	0.5
485	1	29	1	24.55	5.14	0.71	3.95	1.55	39.2405	2.03	51.3924	1.30968	0.37
486	1	40	2		4.59	0.5	4.62	1.58	34.1991	2.42	52.381	1.53165	0.62
487	1	30	1	25.04	4.85	0.83	3.83	1.12	29.2428	2.33	60.8355	2.08036	0.38
488	1	31	1	23.56	4.91	0.9	3.51	1.18	33.6182	1.86	52.9915	1.57627	0.47
489	1	26	1	23	4.86	0.81	3.98	1.45	36.4322	2.19	55.0251	1.51034	0.34	1.66	101.1	1.67	14.58	4.81	0.5
490	1	28	1	22.35	4.33	0.85	3.74	1.26	33.6898	2.17	58.0214	1.72222	0.31	2.171	86.78	1.84	12.5	4.89	0.52
491	1	47	2	22.02	4.45	0.96	4.24	1.31	30.8962	2.42	57.0755	1.84733	0.51	1.843	87.73	1.72	11.73	5.19	1.22
492	1	50	2	28.19	5.85	1.1	3.26	1.07	32.8221	1.72	52.7607	1.60748	0.47
493	1	46	2	22.03	5.03	0.52	4.93	1.32	26.7748	2.91	59.0264	2.20455	0.7	0.952	98.55	1.33	14.9	4.44	0.77
494	1	26	1	21.59	5.24	0.67	3.68	1.38	37.5	1.76	47.8261	1.27536	0.54
495	1	27	1	25.04	4.68	0.83	3.92	1.28	32.6531	2.14	54.5918	1.67188	0.5
496	1	27	1	20.96	5.68	0.63	4.2	1.17	27.8571	2.72	64.7619	2.32479	0.31
497	1	40	2	20.03	4.82	0.88	3.86	1.45	37.5648	2.12	54.9223	1.46207	0.29	2.481	102.43	1.26	15.09	4.29	0.5	1.14
498	1	37	2	19.99	4.8	0.94	4.84	1.73	35.7438	2.68	55.3719	1.54913	0.43	0.987	91.38	1.2	13.33	4.11	0.5	1.04
499	1	53	2		4.43	1.45	5.31	1.16	21.8456	3.43	64.5951	2.9569	0.72	2.604	73.1	1.18	11.93	4.2
500	1	52	2	26.17	5.72	1.98	5.85	1	17.094	3.81	65.1282	3.81	1.04	2.005	109.58	1.87	14.32	5.32
501	2	47	2	23.77	5.47	0.46	4.3	1.29	30	2.56	59.5349	1.9845	0.45	1.986	74.66	1.6	11.78	5.06
502	2	63	3	23.76	4.7	0.98	5.5	1.55	28.1818	3.27	59.4545	2.10968	0.68	2.677	131.2	2.01	14.84	5.8
503	1	45	2	23.6	4.21	0.68	3.9	1.14	29.2308	2.27	58.2051	1.99123	0.49	1.838	99.39	1.67	12.63	4.96
504	1	37	2	26.74	4.82	3.42	5.03	0.75	14.9105	3.09	61.4314	4.12	1.19	3.984	96.47	1.81	12.37	5.37
505	2	32	1	18.38	4.42	0.53	4.58	1.54	33.6245	2.6	56.7686	1.68831	0.44	1.747	93.28	1.58	13.28	4.65
506	1	43	2	25.86	4.83	1.47	4.72	1.7	36.0169	2.35	49.7881	1.38235	0.67	1.428	103.13	1.85	13.56	5.3
507	2	42	2	24.58	5.2	0.69	4.26	1.41	33.0986	2.5	58.6854	1.77305	0.35	2.042	96.91	1.73	12.57	4.85
508	2	41	2	22.52	4.73	0.53	4.69	1.46	31.1301	2.91	62.0469	1.99315	0.32	2.179	89.24	1.5	12.31	4.16
509	1	39	2	25.16	4.83	1.19	3.24	0.68	20.9877	1.95	60.1852	2.86765	0.61	1.752	73.18	1.7	11.74	4.82
510	2	46	2	21.72	4.95	1.2	3.71	1.38	37.1968	1.87	50.4043	1.35507	0.46	1.918	87.97	1.41	12.45	4.74
511	2	45	2	26.69	5.04	1.58	4.33	1.06	24.4804	2.65	61.2009	2.5	0.62	4.518	76.75	1.45	11.38	4.39
512	1	47	2	24.96	4.78	1.19	4.67	0.79	16.9165	3.23	69.1649	4.08861	0.65	1.934	131.73	1.73	17.01	5.05
513	2	40	2	23.47	4.66	2.1	6.08	0.87	14.3092	4.12	67.7632	4.73563	1.09	1.035	74.63	1.45	10.75	4.44
514	2	67	3	20.52	4.52	0.78	4.98	1.72	34.5382	2.8	56.2249	1.62791	0.46	1.394	122.17	1.68	14.43	4.63
515	2	35	2	23.88	5.46	0.93	4.81	1.24	25.7796	2.97	61.7464	2.39516	0.6	3.198	97.48	1.56
516	2	32	1	21.08	4.83	0.77	3.81	1.3	34.1207	2.28	59.8425	1.75385	0.23	1.321	89.47	1.4	12.29	4.38
517	2	30	1	21.27	4.69	0.85	4.45	1.1	24.7191	2.78	62.4719	2.52727	0.57	4.333	112.81	1.88	13.93	5.22
518	2	31	1	18.99	5.21	0.74	3.78	1.56	41.2698	1.86	49.2063	1.19231	0.36	0.661	107.35	1.63	13.85	4.53
519	2	43	2	24.69	5.37	0.61	4.61	1.75	37.961	2.45	53.1453	1.4	0.41	1.883	91.04	1.33	12.83	3.75
520	1	49	2	24	5.18	0.59	4.85	1.66	34.2268	2.79	57.5258	1.68072	0.4	1.485	89.88	1.64	12.4	4.76
521	2	35	2	24.96	5.22	0.96	5.13	1.47	28.655	3.03	59.0643	2.06122	0.63	1.245	90.64	1.73	13.3	4.95
522	2	70	3	22.89	5.66	1	5.91	1.78	30.1184	3.57	60.4061	2.00562	0.56	2.978	90.21	1.53	12.84	4.21
523	2	36	2	21.4	5.14	0.74	4.66	1.46	31.3305	2.7	57.9399	1.84932	0.5	2.845	85.6	1.47	12.73	4.89
524	1	47	2	30.39	4.63	2.59	4.69	0.79	16.8443	2.9	61.8337	3.67089	1	2.145	97.41	1.71	12.28	4.32
525	1	31	1	19.8	4.76	1.34	3.59	1.09	30.3621	1.83	50.9749	1.6789	0.67	3.299	83.84	1.59	13.11	4.86
526	2	33	1	16.18	4.14	0.75	5.58	1.93	34.5878	3.32	59.4982	1.72021	0.33	1.174	97.94	1.46	13.7	4.01
527	2	67	3	22.11	4.91	2.02	6.03	1.28	21.2272	3.82	63.3499	2.98438	0.93	0.832	112.88	1.56	15.26	4.6
528	2	46	2	22.88	4.73	0.99	4.75	1.44	30.3158	2.7	56.8421	1.875	0.61	0.734	111.03	1.54	13.61	4.09
529	1	61	3	23.86	5.56	1.3	4.1	1.06	25.8537	2.3	56.0976	2.16981	0.74	1.928	102.8	2.03
530	2	61	3	23.31	5.13	0.93	3.91	1.3	33.2481	2.13	54.4757	1.63846	0.48	1.546	115.09	1.77	14.89	4.89
531	1	68	3	24.27	4.92	0.99	5.51	1.26	22.8675	3.54	64.2468	2.80952	0.71	1.693	83.3	1.45	11.44	4.07
532	2	32	1	19.41	4.81	0.54	3.58	1.51	42.1788	1.81	50.5587	1.19868	0.26	4.434	71.91	1.39	10.37	4.09
533	2	49	2	21.64	4.11	2.09	4.24	1.08	25.4717	2.35	55.4245	2.17593	0.81	2.219	100.08	1.42	13.78	4.61
534	2	47	2	28.64	4.61	1.26	4.36	1.44	33.0275	2.34	53.6697	1.625	0.58	1.537	114.43	2.2	13.03	5.27
535	2	38	2	20.88	4.69	0.58	3.84	1.37	35.6771	2.15	55.9896	1.56934	0.32	0.802	99.48	1.16	14.36	3.53
536	2	69	3	20.62	4.74	1.74	4.67	1.23	26.3383	2.52	53.9615	2.04878	0.92	3.233	121.45	1.31	16.6	4.04
537	2	43	2	21.12	4.85	0.67	4.12	1.44	34.9515	2.3	55.8252	1.59722	0.38	1.639	95.68	1.5	13.43	4.24
538	1	27	1	21.45	4.55	1.29	4.7	1.3	27.6596	2.83	60.2128	2.17692	0.57	1.011	124.57	1.39	16.97	4.49
539	2	65	3	23.42	4.94	1.22	5.85	1.63	27.8632	3.47	59.3162	2.12883	0.75	1.297	76.94	1.19	11.79	3.8
540	1	71	3	24.96	4.88	1.89	4.93	1.29	26.1663	2.95	59.8377	2.28682	0.69	2.008	99.96	1.72	12.21	4.66
541	1	62	3	25.42	5.16	1.04	5.73	1.22	21.2914	3.77	65.7941	3.09016	0.74	1.875	90.82	1.58	13.95	4.44
542	1	33	1	28.69	5.46	1.21	6.14	1.82	29.6417	3.74	60.9121	2.05495	0.58	3.209	78.25	1.56	12.77	5.02
543	2	31	1	21.47	4.63	0.94	4.01	1.59	39.6509	2	49.8753	1.25786	0.42	0.898	89.89	1.29	14.3	4.5
544	1	41	2	23.67	5.1	0.76	3.73	1.07	28.6863	2.19	58.7131	2.04673	0.47	0.714	105.76	1.8
545	2	40	2	19.63	5.14	0.74	4.66	1.46	31.3305	2.7	57.9399	1.84932	0.5	1.817	111.3	1.83	14.99	4.77
546	1	59	3	27.27	5.1	1.02	4.63	1.07	23.1102	2.89	62.419	2.70093	0.67	0.981	107.74	6.13
547	2	36	2	19.69	4.98	0.58	4.83	1.74	36.0248	2.63	54.4513	1.51149	0.46	0.221	96.99	1.55	12.75	4.19
548	2	67	3	25.12	5.9	1.48	5.16	1.32	25.5814	3.08	59.6899	2.33333	0.76	2.948	123.51	1.85	15.16	5.38
549	2	33	1	20.34	4.26	0.71	3.59	1.38	38.4401	1.81	50.4178	1.31159	0.4	1.275	98.46	1.88	15.01	4.88
550	2	37	2	24.16	5.1	0.82	4.18	1.44	34.4498	2.33	55.7416	1.61806	0.41	2.226	99.34	1.55	12.65	4.04
551	2	57	3	24.14	4.78	0.56	3.67	1.78	48.5014	1.49	40.5995	0.837079	0.4	1.707	121.72	1.74	13.07	4.67
552	1	41	2	18.14	4.69	0.73	3.93	1.42	36.1323	2.02	51.3995	1.42254	0.49	2.64	111.55	1.99	13.48	4.94
553	2	32	1	22.82	4.54	1.42	4.79	1.23	25.6785	2.63	54.9061	2.13821	0.93	2.605	87.79	1.38	12.44	4.31
554	2	42	2	23.43	5.23	0.55	4.05	1.72	42.4691	1.7	41.9753	0.988372	0.63	2.039	96.75	1.38	13.74	4.39
555	2	39	2	20.03	4.6	0.46	3.3	0.88	26.6667	2.02	61.2121	2.29545	0.4	3.607	84.8	1.13	12.69	3.57
556	1	34	1	24.33	5.03	2.93	5.85	1.02	17.4359	3.51	60	3.44118	1.32	1.749	98.46	1.78
557	2	39	2	20.01	4.55	1.31	5.07	1.2	23.6686	3.05	60.1578	2.54167	0.82	1.663	93.15	1.46	13.54	4.77
558	1	72	3	19.67	4.75	0.82	5.75	1.22	21.2174	3.86	67.1304	3.16393	0.67	0.906	98.54	1.6	11.47	4.72
559	2	33	1	24.12	4.42	0.85	5.6	2.23	39.8214	2.54	45.3571	1.13901	0.83	1.906	75.67	1.56	11.03	5
560	2	33	1	20.44	4.51	0.81	4	1.41	35.25	2.15	53.75	1.52482	0.44	1.746	82.16	1.22	12.3	4.4
561	2	39	2	18.82	4.67	1.09	4.64	0.99	21.3362	3.05	65.7328	3.08081	0.6	1.693	102.74	1.7	13.09	4.99
562	2	33	1	19.61	4.86	0.71	4.62	1.41	30.5195	2.59	56.0606	1.83688	0.62	3.655	77.3	1.34	12.25	4.13
563	1	38	2	25.99	4.67	0.66	4.29	1.54	35.8974	2.21	51.5152	1.43506	0.54	1.382	111.37	2.05	14.93	5.63
564	2	53	2	21.01	4.92	0.99	4.82	1.98	41.0788	2.39	49.5851	1.20707	0.45	1.433	97.16	1.1	12.97	4.23
565	2	31	1	18.71	5.41	2.54	4.57	0.87	19.0372	2.68	58.6433	3.08046	1.02	1.34	92.99	1.7	13.08	5.13
566	2	70	3	22.35	4.8	1.14	8.79	1.35	15.3584	5.42	61.661	4.01481	2.02	0.937	96.23	1.57	12.7	4.59
567	2	49	2	23.2	5.35	1.16	4.23	0.98	23.1678	2.63	62.1749	2.68367	0.62	2.28	110.47	1.57	12.83	4.89
568	2	40	2	18.63	4.74	0.45	4.27	1.83	42.8571	1.72	40.281	0.939891	0.72	1.438	90.59	1.46	11.68	4.16
569	2	40	2	20.48	4.89	0.55	4.72	1.7	36.0169	2.61	55.2966	1.53529	0.41	0.435	132.56	1.79	15.96	5.09
570	1	28	1	22.58	5.25	0.71	4.09	1.17	28.6064	2.2	53.7897	1.88034	0.72	2.022	119.58	1.62	14.71	4.77
571	2	51	2		5.17	1.12	4.68	1.29	27.5641	2.79	59.6154	2.16279	0.6	4.388	80.34	1.38	10.31	3.71
572	2	30	1	21.34	5.62	0.66	4.72	1.52	32.2034	2.68	56.7797	1.76316	0.52	2.026	100.69	1.67	12.78	5.12
573	2	37	2	19.76	4.63	3.37	5.5	0.98	17.8182	3.03	55.0909	3.09184	1.49	1.664	94.25	1.49	13.06	4.2
574	1	50	2	27.92	5.56	1.43	4.99	0.98	19.6393	3.28	65.7315	3.34694	0.73	1.509	83.34	1.43	11.41	4.51
575	2	45	2	18.65	5.55	1.05	4.82	1.33	27.5934	3.02	62.6556	2.27068	0.47	2.09	95.46	1.36	13	3.79
576	2	55	2	25.22	5.12	1.38	5.19	1.18	22.736	3.41	65.7033	2.88983	0.6	1.664	109.7	1.36	13.77	4.04
577	2	33	1	21.21	4.69	2.02	3.66	0.77	21.0383	2.17	59.2896	2.81818	0.72	0.326	89.34	1.58	13.19	4.88
578	1	26	1	19	5	1.34	4.03	0.88	21.8362	2.59	64.268	2.94318	0.56	2.795	114.27	1.67	13.96	4.8
579	1	68	3	21.87	4.85	1.33	3.98	1.3	32.6633	2.02	50.7538	1.55385	0.66	3.567	86.36	1.45	11.98	4.07
580	2	41	2	20.77	4.76	0.69	3.93	1.56	39.6947	1.9	48.3461	1.21795	0.47	1.044	95.65	1.53	12.49	4.36
581	2	28	1	17.48	4.15	2.1	5.9	2.06	34.9153	2.9	49.1525	1.40777	0.94	1.108	93.86	1.82	11.81	5.05
582	2	32	1	19.89	4.84	1.12	3.98	0.91	22.8643	2.56	64.3216	2.81319	0.51	1.879	95.99	1.59	12.23	5.09
583	1	72	3	23.65	4.83	0.98	4.49	1.61	35.8575	2.31	51.4477	1.43478	0.57	3.877	91.21	1.46	12.25	4.39
584	2	41	2	22.21	4.27	0.65	4.49	1.5	33.4076	2.47	55.0111	1.64667	0.52	2.286	82.85	1.3	11.95	3.94
585	2	34	1	26	4.49	1.22	5.59	1.96	35.0626	2.78	49.7317	1.41837	0.85	1.342	90.92	1.49	12.52	4.48
586	1	40	2	20.72	5.36	1.05	4.91	1.24	25.2546	2.96	60.2851	2.3871	0.71	1.01	99.72	1.44	12.01	4.62
587	2	40	2		4.29	0.76	3.69	1.23	33.3333	1.92	52.0325	1.56098	0.54	1.756	83.04	1.26	10.71	3.36
588	2	40	2	25.33	4.61	0.87	4.95	1.18	23.8384	3.24	65.4545	2.74576	0.53	3.469	96.14	1.35	13.18	4.08
589	2	30	1	20.09	5.07	0.8	5.91	2.46	41.6244	3	50.7614	1.21951	0.45	2.02	99.05	1.37	13.13	4.22
590	1	40	2	24.84	5.47	0.56	4.89	2.49	50.9202	2.11	43.1493	0.84739	0.29	3.433	101.36	1.85	12.44	4.92
591	1	58	3	26.54	4.38	0.88	3.96	1.43	36.1111	2.03	51.2626	1.41958	0.5	3.615	75.75	1.63	10.55	4.53
592	2	38	2	21.22	5.32	0.69	4.08	1.31	32.1078	2.35	57.598	1.79389	0.42	1.602	134.83	2.14	12.13	4.84
593	2	33	1	19.64	4.08	2.38	5.67	1.05	18.5185	3.66	64.5503	3.48571	0.96	2.143	106.65	1.73	13.57	4.52
594	2	42	2	26.09	4.93	1.57	3.65	1.24	33.9726	1.76	48.2192	1.41935	0.65	1.235	96.15	1.69	13.31	4.69
595	2	28	1	20.64	4.79	1.85	4.63	0.93	20.0864	3.04	65.6587	3.26882	0.66	0.856	107.89	1.82	13.99	4.65
596	2	29	1	17.3	4.24	0.65	5.18	2.34	45.1737	2.34	45.1737	1	0.5	1.195	114.14	1.7	13.18	4.72
597	2	37	2	19.09	4.23	0.79	3.94	1.34	34.0102	2.1	53.2995	1.56716	0.5	1.203	95.8	1.42	12.9	4.11
598	2	41	2	20.3	4.91	1.02	3.36	1.47	43.75	1.12	33.3333	0.761905	0.77	1.463	97.83	1.31	13.9	4.41
599	1	34	1	22.98	4.78	1.37	3.61	1.16	32.133	1.89	52.3546	1.62931	0.56	1.501	109.11	1.56	14.79	4.73
600	2	46	2	24.11	4.84	0.62	4.05	1.74	42.963	1.99	49.1358	1.14368	0.32	1.014	104.36	1.91	13.32	4.71
601	2	37	2	19.71	5.3	0.9	4.98	1.65	33.1325	2.46	49.3976	1.49091	0.87	1.845	117.27	1.6	14.88	4.41
602	2	43	2		5.15	0.71	3.26	1.56	47.8528	1.35	41.411	0.865385	0.35	1.404	101.02	1.82	13.24	5.09
603	1	29	1	22.53	4.9	1.19	5.13	0.84	16.3743	3.69	71.9298	4.39286	0.6	1.522	89.78	1.57	13.55	4.84
604	2	33	1	21.13	4.77	1.26	4.14	1.3	31.401	2.23	53.8647	1.71538	0.61	0.965	89.6	1.56	12.55	5.11
605	2	29	1	21.89	4.59	1.64	4.72	1.21	25.6356	2.98	63.1356	2.46281	0.53	1.471	97.73	1.39	13.56	4.26
606	1	65	3	24.83	4.9	0.93	3.43	1.43	41.691	1.53	44.6064	1.06993	0.47	1	82.57	1.6	11.6	4.4
607	1	35	2	25.54	5.25	1.74	3.44	0.86	25	1.9	55.2326	2.2093	0.68	1.141	94.62	1.96	12.65	5.92
608	2	48	2	20.56	5.07	0.71	3.18	1.09	34.2767	1.77	55.6604	1.62385	0.32	1.903	121.28	1.41	12.98	3.81
609	2	49	2	21.51	4.39	0.54	4.01	1.76	43.8903	1.89	47.1322	1.07386	0.36	0.926	94.79	1.33	14.28	4.2
610	1	53	2	23.95	6.05	1.61	5.51	1.29	23.412	3.27	59.3466	2.53488	0.95	1.129	93.17	1.64	13.81	5.33
611	2	31	1		5.01	1.64	3.69	0.9	24.3902	1.94	52.5745	2.15556	0.85	2.718	116.39	1.68	13.84	4.35
612	1	35	2	22.91	4.96	1.83	5.52	1.15	20.8333	3.5	63.4058	3.04348	0.87	1.71	91.58	1.74	11.9	5.28
613	2	30	1	20.85	5	1.07	4.17	1.37	32.8537	2.38	57.0743	1.73723	0.42	0.958	94.7	1.52	13.69	5.05
614	2	47	2	20.83	4.37	0.99	4.86	1.06	21.8107	3.11	63.9918	2.93396	0.69	1.224	113.05	1.66	12.83	4.78
615	2	29	1	17.19	4.79	1.36	5.68	1.24	21.831	3.61	63.5563	2.91129	0.83	1.352	94.19	1.7	12.84	5.11
616	2	60	3	21.68	4.48	0.53	3.27	1.21	37.0031	1.74	53.211	1.43802	0.32	1.091	108.64	1.84	12.66	5.28
617	1	50	2	24.07	4.47	0.63	3.47	1.13	32.5648	1.68	48.415	1.48673	0.66	1.686	96.81	1.75	11.95	4.73
618	2	30	1	18.47	4.44	0.94	4.43	1.23	27.7652	2.72	61.3995	2.21138	0.48	0.966	110.81	1.77	14.35	5.43
619	2	44	2	22.6	4.99	0.66	4.85	1.79	36.9072	2.61	53.8144	1.4581	0.45	4.777	97.77	1.41	12.8	4.48
620	2	72	3	27.62	4.15	1.05	4.48	1.48	33.0357	2.43	54.2411	1.64189	0.57	1.412	109.82	1.66	13.22	5.23
621	1	34	1	19.41	4.67	2.12	6.32	1.02	16.1392	4.39	69.462	4.30392	0.91	2.181	92.4	1.56	11.5	4.45
622	1	68	3	22.12	4.45	1.43	3.83	1.03	26.893	2.2	57.4413	2.13592	0.6	1.77	106.37	1.78	11.89	5.05
623	1	56	3	27.05	4.7	0.69	3.57	1.59	44.5378	1.43	40.056	0.899371	0.55	1.394	122.85	1.39	16.03	4.68
624	2	41	2	20.19	5.26	1.29	4.14	1.38	33.3333	2.07	50	1.5	0.69	0.954	96.33	1.67	11.63	4.6
625	2	39	2	19.23	4.5	1.13	5.45	1.38	25.3211	3.26	59.8165	2.36232	0.81	0.787	88.53	1.27	12.1	4.36
626	2	36	2	21.74	4.94	0.42	4.27	2.05	48.0094	1.84	43.0913	0.897561	0.38	2.909	117.57	1.66	12.38	4.46
627	1	26	1	19.42	4.12	1.4	5.29	1.08	20.4159	3.45	65.2174	3.19444	0.76	0.919	103.47	1.53	14.01	4.89
628	2	45	2	20.11	4.75	1.03	4.59	1.63	35.512	2.46	53.5948	1.5092	0.5	1.373	109.97	1.47	13.38	4.61
629	2	35	2		4.16	1.14	4.36	1.15	26.3761	2.29	52.5229	1.9913	0.92	0.975	138.77	1.92	12.21	4.63
630	1	41	2	19.2	4.77	0.7	3.53	1.6	45.3258	1.55	43.9093	0.96875	0.38	1.942	101.58	1.29	15.28	4.86
631	2	68	3	24.64	4.5	0.8	4.58	1.68	36.6812	2.43	53.0568	1.44643	0.47	4.025	89.16	1.38	11.7	3.77
632	1	45	2		4.92	1.47	3.98	1.36	34.1709	1.8	45.2261	1.32353	0.82	0.838	91.46	1.57	12.73	4.66
633	2	30	1	21.89	4.3	1.03	3.92	1.2	30.6122	2.25	57.398	1.875	0.47	1.695	84.38	1.42	13.64	4.47
634	2	55	2	25.93	5.36	1.57	6.77	2.2	32.4963	3.84	56.7208	1.74545	0.73	5.127	123.22	1.8	13.89	4.53
635	2	37	2	22.73	5.01	0.43	3.93	1.61	40.9669	1.92	48.855	1.19255	0.4	2.491	89.77	1.39	13.48	4.16
636	2	41	2	23.33	4.34	0.74	3.52	1.56	44.3182	1.48	42.0455	0.948718	0.48	0.633	92.54	1.86	12.06	5.04
637	2	29	1	19.91	5.53	0.63	5.12	1.21	23.6328	3.18	62.1094	2.6281	0.73	2.77	79.44	1.45	12.76	4.59
638	1	35	2	22.45	4.33	1.22	3.78	1.23	32.5397	1.86	49.2063	1.5122	0.69	2.737	95.81	1.7	12.52	4.89
639	2	35	2	22.04	4.98	1.04	4.42	1.23	27.8281	2.49	56.3348	2.02439	0.7	2.746	73.68	1.18	11.83	4.16
640	1	47	2	24.85	4.67	1.35	3.74	1.37	36.631	1.81	48.3957	1.32117	0.56	1.125	116.26	1.91	14.96	5.21
641	1	40	2	29.64	4.78	1.23	4.58	1.09	23.7991	3.01	65.7205	2.76147	0.48	1.316	110.06	1.67	12.4	4.69
642	1	47	2	23.85	5.66	2.64	4.07	0.76	18.6732	1.99	48.8943	2.61842	1.32	1.991	91.72	1.58	13.13	4.18
643	2	40	2	19.5	4.72	0.7	4.28	1.85	43.2243	1.94	45.3271	1.04865	0.49	1.271	91.14	1.79	12.43	4.01
644	2	32	1	17.83	5.21	0.87	4.05	1.68	41.4815	1.98	48.8889	1.17857	0.39	1.759	100.07	1.43	14.03	4.59
645	1	35	2	25.64	5.07	1.12	5.43	1.83	33.7017	3.15	58.011	1.72131	0.45	1.456	88.06	1.53	13.64	4.82
646	1	31	1	17.82	4.96	0.64	4.46	1.62	36.3229	2.37	53.139	1.46296	0.47	0.734	93.09	1.61	12.53	4.47
647	1	27	1	25.08	3.86	0.95	4.79	1.53	31.9415	2.53	52.8184	1.65359	0.73	2.877	101	1.74	13.77	5.62
648	2	67	3	22.45	4.76	1.4	4.37	1.18	27.0023	2.63	60.1831	2.22881	0.56	3.255	103.56	1.81	12.75	5.3
649	2	39	2	18.59	6	2.08	5.18	0.78	15.0579	3.17	61.1969	4.0641	1.23	1.897	92.76	1.45	12.77	4.35
650	2	42	2	24.39	5.34	0.63	4.32	1.21	28.0093	2.56	59.2593	2.1157	0.55	0.903	90.12	1.41	12.37	4.18
651	2	45	2	21.51	4.56	0.47	4.48	1.41	31.4732	2.64	58.9286	1.87234	0.43	2.815	97.74	1.36	11.99	4.43
652	1	42	2	20.39	4.58	0.71	3.91	2.13	54.4757	1.41	36.0614	0.661972	0.37	2.5	97.52	1.57	11.81	4.74
653	1	56	3	24.87	4.47	0.9	5.02	1.31	26.0956	3.17	63.1474	2.41985	0.54	2.186	89.41	1.79	10.2	5
654	1	53	2		5.9	1.61	4.18	0.86	20.5742	2.49	59.5694	2.89535	0.83	2.334	104.61	1.72	13.28	4.9
655	1	39	2	22.52	5.68	1.42	3.74	1.04	27.8075	1.8	48.1283	1.73077	0.9	0.935	105.3	1.8	13.38	4.76
656	1	63	3	23.79	4.41	0.46	4.98	1.77	35.5422	2.54	51.004	1.43503	0.67	1.483	104.5	1.6	13.44	4.66
657	1	34	1	26.93	4.58	0.71	4.76	1.39	29.2017	2.75	57.7731	1.97842	0.62	0.695	72.55	1.56	13.44	4.88
658	1	39	2	22.66	5.33	1.19	5.41	1.45	26.8022	3.04	56.1922	2.09655	0.92	1.399	89.59	1.58	13.08	4.44
659	2	41	2	20.45	5.61	1.48	3.9	0.94	24.1026	2.06	52.8205	2.19149	0.9	2.199	73.76	1.3	12.8	3.73
660	1	47	2	23.87	5.04	1.14	3.95	1.3	32.9114	2.03	51.3924	1.56154	0.62	1.694	84.87	1.41	12.95	3.91
661	1	49	2	24.57	4.49	0.54	3.98	1.19	29.8995	2.41	60.5528	2.02521	0.38	1.522	93.35	1.77	12.87	5.07
662	2	59	3	24.42	4.98	1.52	3.81	1.04	27.2966	1.9	49.8688	1.82692	0.87	1.088	97.3	1.56	13.51	4.33
663	1	44	2	23.19	4.86	0.77	5.19	1.64	31.5992	3.05	58.7669	1.85976	0.5	0.795	111.03	1.77	13.71	5.12
664	2	44	2	21.83	4.92	1.12	3.7	1.35	36.4865	1.73	46.7568	1.28148	0.62	2.174	74.26	1.51	11.43	4.9
665	2	37	2	20.27	4.59	0.92	5.32	2.05	38.5338	2.42	45.4887	1.18049	0.85	3.175	120.68	2.15	15.88	5.3
666	2	39	2		5.17	1.14	4.46	1.08	24.2152	2.73	61.2108	2.52778	0.65	0.664	71.11	1.35	11.42	3.98
667	2	40	2	22.76	4.93	1.32	5.82	1.4	24.055	3.29	56.5292	2.35	1.13	1.45	99.86	1.44	13.55	4.29
668	2	41	2	20.81	5.36	0.89	3.35	0.95	28.3582	1.64	48.9552	1.72632	0.76	1.297	90	1.4	12.53	3.93
669	2	51	2	25.22	4.54	0.4	4.97	1.49	29.9799	2.84	57.1429	1.90604	0.64	1.114	88.58	1.63	10.62	3.42
670	1	63	3		5.46	1.27	3.72	1.16	31.1828	1.84	49.4624	1.58621	0.72	1.949	83.43	1.46	11.35	4.15
671	2	61	3	23.3	5.1	0.79	4.7	1.28	27.234	2.95	62.766	2.30469	0.47	2.869	98.48	1.58	13.38	4.67
672	2	44	2	26.59	5.03	1.32	4.78	1.16	24.2678	2.78	58.159	2.39655	0.84	1.548	82.4	1.2	12.82	3.55
673	1	36	2	21.7	4.47	1.34	5.78	0.96	16.609	4.03	69.7232	4.19792	0.79	1.571	70.8	1.53	11.58	4.63
674	2	40	2	20.03	4.94	6	5.4	0.73	13.5185	1.43	26.4815	1.9589	3.24	1.828	114.85	1.35	13.34	3.66
675	1	28	1	22.24	5	0.49	3.61	1.23	34.072	2.06	57.0637	1.6748	0.32	2.762	78.24	1.6	12.71	5.12
676	2	35	2	20.93	4.76	1.19	4.51	1.41	31.2639	2.56	56.7627	1.8156	0.54	2.744	105.35	1.2	13.9	3.8
677	1	54	2	26.73	4.65	1.04	4.39	1.26	28.7016	2.37	53.9863	1.88095	0.76	2.49	84.75	1.49	11.86	4.88
678	1	53	2	25.15	5.51	0.81	3.92	2.17	55.3571	1.27	32.398	0.585253	0.48	0.871	106.04	1.7	13.34	4.47
679	1	57	3	22.99	5.54	1.19	6.42	1.32	20.5607	3.87	60.2804	2.93182	1.23	1.514	109.45	2.11	14.12	5.66
680	2	42	2	21.57	6.04	2.05	6.09	1.23	20.197	3.63	59.6059	2.95122	1.23	0.533	91.76	1.34	12.5	3.91
681	2	61	3	19.31	4.8	0.56	4.46	1.8	40.3587	2.19	49.1031	1.21667	0.47	1.621	121.66	2.06	12.71	5.13
682	1	42	2	21.77	5.47	1.32	6.2	2.44	39.3548	3.03	48.871	1.2418	0.73	0.916	84.93	1.56	12.85	4.41
683	1	56	3	27.57	4.92	1.53	6.1	1.2	19.6721	3.89	63.7705	3.24167	1.01	0.941	92.42	1.52	11.2	4.98
684	2	67	3	24.38	5.11	1.29	4.09	0.78	19.0709	2.39	58.4352	3.0641	0.92	0.027	118.07	1.45	16.66	4.5
685	2	40	2		5.42	0.77	3.33	0.84	25.2252	2.01	60.3604	2.39286	0.48	1.078	85.93	1.54	12.66	4.51
686	1	38	2	24.65	5.25	2.04	4.7	1.2	25.5319	2.37	50.4255	1.975	1.13	2.11	67.45	1.45	11.9	4.85
687	2	41	2		4.51	2.42	5.28	1.31	24.8106	2.88	54.5455	2.19847	1.09	2.04	94.71	1.61	12.84	4.73
688	2	37	2	20.31	4.56	0.62	3.72	1.36	36.5591	1.92	51.6129	1.41176	0.44	1.749	89.29	1.45	11.56	4.52
689	1	38	2	24.15	4.77	0.91	5.2	1.46	28.0769	3.02	58.0769	2.06849	0.72	2.011	104.05	1.55	15.28	5.11
690	2	70	3	19.9	4.56	1.49	4.29	1.48	34.4988	2.08	48.4848	1.40541	0.73	2.178	118.93	1.9	14.01	4.95
691	2	67	3	24.01	5.43	3.23	4.42	0.78	17.6471	2.52	57.0136	3.23077	1.12	1.008	94.18	1.69	12.72	4.87
692	1	33	1	23.4	5.09	2.44	4.55	0.89	19.5604	2.69	59.1209	3.02247	0.97	1.664	115.81	1.85	14.24	5.37
693	2	41	2		4.97	2.63	4.36	0.72	16.5138	2.6	59.633	3.61111	1.04	0.915	88.7	1.32	13.81	4.21
694	2	44	2		4.44	0.94	4.01	1.01	25.187	2.56	63.8404	2.53465	0.44	1.225	91.48	1.29	14.11	4.35
695	1	34	1	23.4	4.98	1.29	4.89	1.65	33.7423	2.69	55.0102	1.6303	0.55	2.923	63.27	1.3	11.08	4.35
696	1	34	1	23.39	4.84	1.66	5.11	1.25	24.4618	2.92	57.1429	2.336	0.94	0.535	118.31	1.92	13.09	4.97
697	1	32	1	24.93	4.76	0.82	5.13	1.25	24.3665	3.28	63.9376	2.624	0.6	1.537	99.05	1.49	13.08	4.85
698	1	32	1	23.89	4.72	1.99	7.59	2.03	26.7457	4.23	55.7312	2.08374	1.33	1.777	109.99	1.63	14.54	4.91
699	1	34	1	27.71	5.06	1.87	5.11	1.55	30.3327	2.12	41.4873	1.36774	1.44	2.418	103.17	1.62	12.28	5.36
700	1	29	1	26.49	4.31	0.95	3.94	1.31	33.2487	2.17	55.0761	1.65649	0.46	1.367	100.67	2.01	12.63	5.1
701	1	52	2	18.69	5.23	0.58	3.4	1.22	35.8824	1.74	51.1765	1.42623	0.44	2.907	105.69	1.98	13.02	5.15
702	1	41	2	23.91	5.93	0.73	5.91	2.02	34.1794	3.07	51.9459	1.5198	0.82	2.363	110.26	1.81	13.06	5.06
703	2	64	3	24.02	6.18	2.16	4.25	0.67	15.7647	2.84	66.8235	4.23881	0.74	3.281	74.79	1.44	11.88	4.48
704	1	30	1	23.77	4.65	0.79	2.35	1.11	47.234	0.9	38.2979	0.810811	0.34	0.997	101.43	1.86	13.44	5.43
705	1	51	2	23.01	4.81	1.89	5.34	1	18.7266	3.51	65.7303	3.51	0.83	1.907	90.86	1.77	12.54	4.38
706	2	57	3	18.15	4.72	1.35	6.01	1.2	19.9667	4.03	67.0549	3.35833	0.78	2.399	89.83	1.44	12.02	4.28
707	2	44	2		5.09	1.08	4.11	1.09	26.5207	2.57	62.5304	2.3578	0.45	2.244	99.87	1.58	12.39	4.77
708	1	62	3	25.72	5.23	2.8	5.43	1.57	28.9134	2.97	54.6961	1.89172	0.89	2.641	120.79	1.93	13.03	5.23
709	2	42	2	19.71	4.67	2.95	4.85	0.91	18.7629	2.58	53.1959	2.83516	1.36	2.678	113.02	1.61	13.07	4
710	1	41	2	21.11	5.55	3.12	4.52	0.77	17.0354	2.69	59.5133	3.49351	1.06	0.621	75.63	1.5	12.28	4.02
711	2	40	2	23.6	4.25	1.35	4.35	1.44	33.1034	2.34	53.7931	1.625	0.57	2.388	97.54	1.42	11.76	3.89
712	2	39	2	20.42	5.02	1.21	4.21	1.29	30.6413	2.39	56.7696	1.85271	0.53	1.758	120.82	1.87	14.29	4.68
713	1	49	2	26.03	5.12	1.24	4.6	1.24	26.9565	2.81	61.087	2.26613	0.55	1.009	94.81	1.43	13.41	4.39
714	2	50	2	21.49	5.25	1.67	6.08	1.16	19.0789	3.99	65.625	3.43966	0.93	1.968	82.22	1.51	11.29	4.5
715	1	58	3	25.62	4.78	1.07	4.93	1.34	27.1805	3.07	62.2718	2.29104	0.52	0.607	86.49	1.36	12.64	4.29
716	1	59	3	24.73	4.89	0.59	4.24	1.84	43.3962	2.04	48.1132	1.1087	0.36	0.509	79.84	1.52	12.94	4.12
717	1	50	2	27.9	5.06	1.46	4.58	1.36	29.6943	2.65	57.8603	1.94853	0.57	1.823	73.01	1.41	12.03	4.72
718	1	58	3	21.39	5.03	1.88	6.44	1.03	15.9938	4.36	67.7019	4.23301	1.05	1.19	76.26	1.27	12.66	4.89
719	1	34	1	25.62	5.23	0.93	4.72	2.37	50.2119	1.73	36.6525	0.729958	0.62	0.963	116.83	1.41	14.53	4.71
720	2	41	2	22.01	5.17	1.54	4.43	1.19	26.8623	2.62	59.1422	2.20168	0.62	1.325	68.96	1.4	11.7	3.86
721	1	37	2	18.79	5.6	1.44	4.53	1.25	27.5938	2.76	60.9272	2.208	0.52	1.112	110.52	1.67	14.24	5.07
722	1	47	2	25.86	4.5	1.22	4.72	1.3	27.5424	2.81	59.5339	2.16154	0.61	1.38	110.56	1.92	12.59	5.81
723	1	48	2	22.41	5.74	1.95	4.19	0.96	22.9117	2.46	58.7112	2.5625	0.77	1.247	105.05	1.69	12.91	5.38
724	2	53	2	26.3	4.79	2.56	3.53	0.93	26.3456	1.73	49.0085	1.86022	0.87	2.122	95.02	1.82	12.94	5.14
725	1	55	2	24.99	4.9	0.84	3.82	1.26	32.9843	2.15	56.2827	1.70635	0.41	0.708	79.2	1.66	11.2	4.83
726	1	47	2	28.63	4.78	1.96	5.63	1.58	28.0639	3.45	61.2789	2.18354	0.6	2.637	116.55	1.33	14.89	3.94
727	1	36	2	24.54	5.48	1.26	4.04	0.93	23.0198	2.4	59.4059	2.58065	0.71	2.235	102.69	1.65	13.29	4.75
728	2	42	2	23.85	5.06	1.67	4.43	0.85	19.1874	2.9	65.4628	3.41176	0.68	1.647	101.83	1.53	11.88	3.89
729	1	56	3	24.13	5.01	0.8	2.83	1.07	37.8092	1.34	47.3498	1.25234	0.42	1.075	54.83	1.25	11.73	3.99
730	1	29	1	18.91	5.53	1.47	3.78	0.86	22.7513	2.36	62.4339	2.74419	0.56	1.866	99.13	1.53	15.43	5.06
731	1	55	2	22.29	5.04	1.28	4.76	1.47	30.8824	2.8	58.8235	1.90476	0.49	0.814	107.33	1.88	14.03	5.27
732	1	43	2	22.83	4.98	0.69	3.14	1.56	49.6815	1.31	41.7197	0.839744	0.27	2.182	76.37	1.31	12.83	4.03
733	1	40	2	23.88	5.23	0.71	5.12	1.52	29.6875	3.2	62.5	2.10526	0.4	1.064	99.67	1.68	12.56	4.59
734	1	49	2	24.72	4.9	2.24	5.1	1.07	20.9804	3.21	62.9412	3	0.82	1.913	94.76	1.5	14.55	5.23
735	1	53	2	23.89	4.45	0.75	4.89	2.05	41.9223	2.52	51.5337	1.22927	0.32	4.356	72.65	1.4	12.07	5.19
736	2	55	2	22.81	5.3	0.77	4.09	1.99	48.6553	1.66	40.5868	0.834171	0.44	2.047	115.49	1.54	13.63	3.95
737	2	44	2	23.52	4.43	0.89	3.37	1.05	31.1573	1.96	58.1602	1.86667	0.36	4.234	89.39	1.37	12.57	4.11
738	1	60	3	25.95	6.04	3.56	4.99	0.85	17.0341	2.82	56.513	3.31765	1.32	1.277	116.15	1.77	14.15	4.52
739	1	40	2	30.48	5.03	0.88	3.12	1.24	39.7436	1.42	45.5128	1.14516	0.46	1.465	128.18	1.85	14.59	5.32
740	1	35	2	26.4	5.13	1.22	5.55	1.15	20.7207	3.9	70.2703	3.3913	0.5	0.93	56.6	1.39	12.67	4.58
741	1	43	2	26.54	4.68	1.6	5	0.91	18.2	3.34	66.8	3.67033	0.75	1.019	83.22	1.4	13.57	4.32
742	1	41	2	24.13	4.65	1.84	5.58	1.11	19.8925	3.71	66.4875	3.34234	0.76	0.649	89.14	1.39	13.66	4.87
743	1	59	3	26.3	4.65	0.92	3.84	1.35	35.1562	2.11	54.9479	1.56296	0.38	1.423	78.92	1.35	13.5	4.84
744	2	52	2	22.72	4.3	1.19	3.27	0.92	28.1346	1.77	54.1284	1.92391	0.58	0.958	103.67	1.47	13.5	4.55
745	2	56	3	23.31	5.53	2.82	4.14	0.81	19.5652	2.18	52.657	2.69136	1.15	1.752	85.8	1.62	11.82	4.77
746	2	49	2	21.66	5.65	0.81	4.99	1.83	36.6733	2.65	53.1062	1.44809	0.51	1.997	92.88	1.47	12.71	4.34
747	2	52	2	22.08	5.12	0.89	5.25	1.49	28.381	3.19	60.7619	2.14094	0.57	2.264	94.59	1.4	13.99	4.48
748	1	30	1	24.38	4.84	1.74	4.7	0.95	20.2128	3.1	65.9574	3.26316	0.65	2.381	114.1	1.98	14.01	5.24
749	2	52	2	28.64	4.58	0.45	4.38	2.15	49.0868	2	45.6621	0.930233	0.23	2.565	86.95	1.41	12.06	4.3
750	1	53	2	23.33	4.3	1.37	4.48	1.31	29.2411	2.68	59.8214	2.0458	0.49	1.855	100.1	1.65	12.37	4.45
751	1	53	2	24.27	5.32	1.35	5.25	1.11	21.1429	3.17	60.381	2.85586	0.97	3.159	88.73	1.44	12.84	4.84
752	1	32	1	24.08	4.66	1.12	4.23	1.19	28.1324	2.48	58.6288	2.08403	0.56	2.521	121.47	2.28	15.53	6.8
753	1	35	2	24.77	4.89	2.05	4.79	1.35	28.1837	2.71	56.5762	2.00741	0.73	1.42	92.68	1.7	13.6	5.62
754	1	35	2	24.53	4.44	0.84	3.74	1.2	32.0856	2.18	58.2888	1.81667	0.36	1.475	101.02	1.52	16.47	4.99
755	1	66	3	19.88	4.03	1.43	3.88	1.44	37.1134	2.04	52.5773	1.41667	0.4	1.997	92.51	1.57	12.16	4.04
756	1	43	2	23.48	4.64	2.2	5.65	1.05	18.5841	3.73	66.0177	3.55238	0.87	0.98	113.69	1.71	16.42	5.27
757	1	60	3	26.9	4.53	0.76	4.19	1.32	31.5036	2.59	61.8138	1.96212	0.28	0.991	100.79	1.55	14.69	4.95
758	1	37	2	23.01	4.2	0.78	4.67	1.29	27.6231	2.88	61.6702	2.23256	0.5	1.238	101.58	1.71	14.09	4.92
759	1	33	1	22.8	4.75	1.03	4.91	1.07	21.7923	3.11	63.3401	2.90654	0.73	1.242	85.14	1.39	14.12	4.58
760	1	44	2	22.48	4.91	1.22	4.21	1.41	33.4917	2.25	53.4442	1.59574	0.55	1.636	100.48	1.8	12.64	4.4
761	1	43	2	22.41	4.52	1.11	3.73	1.18	31.6354	2.14	57.3727	1.81356	0.41	3.42	100.44	1.82	12.9	4.87
762	1	55	2	22.64	5.22	1.34	4.72	1.42	30.0847	2.59	54.8729	1.82394	0.71	1.022	63.61	1.19	13.7	4.12
763	1	43	2	23.78	4.47	4.08	5.55	0.69	12.4324	3.02	54.4144	4.37681	1.84	1.298	111.26	1.43	16.06	4.75
764	1	47	2	22.31	4.5	1.59	5.08	0.94	18.5039	3.13	61.6142	3.32979	1.01	1.01	95.79	1.56	13.59	3.8
765	1	50	2	22.98	4.77	0.68	3.83	1.67	43.6031	1.78	46.4752	1.06587	0.38	1.063	66.07	1.48	11.75	4.28
766	1	49	2	25.17	4.94	0.78	3.75	1.42	37.8667	1.96	52.2667	1.38028	0.37	1.323	117.35	1.79	15.16	4
767	1	55	2	21.39	4.53	2.08	5.06	1.01	19.9605	3.02	59.6838	2.9901	1.03	2.319	71.56	1.42	10.63	4.04
768	1	50	2	23.93	4.67	0.53	4.46	1.36	30.4933	2.69	60.3139	1.97794	0.41	1.215	113.47	1.73	14.02	4.05
769	1	36	2	21.9	5.2	1.2	4.01	1.02	25.4364	2.31	57.606	2.26471	0.68	0.816	110.35	2.06	13.63	5.38
770	1	29	1	21.34	4.41	0.98	3.34	1.28	38.3234	1.48	44.3114	1.15625	0.58	1.215	79.87	1.68	13.05	4.09
771	1	46	2	21.82	4.92	0.87	4.08	1.15	28.1863	2.4	58.8235	2.08696	0.53	1.609	96.85	1.92	12.69	4.58
772	1	61	3	25.92	4.98	0.86	4.44	1.38	31.0811	2.6	58.5586	1.88406	0.46	1.784	79.78	1.99	11.34	4.57
773	1	39	2	22.4	4.92	1.22	5.05	1.48	29.3069	2.68	53.0693	1.81081	0.89	1.28	106.1	1.95	13.67	5.09
774	1	46	2	25.11	4.63	1.29	4.5	1.62	36	2.37	52.6667	1.46296	0.51	1.753	97.59	1.71	14.43	4.47
775	1	59	3	21.79	5.04	0.85	4.69	1.41	30.064	3.01	64.1791	2.13475	0.27	1.157	119.26	2.23	14.07	4.59
776	1	31	1	25.11	4.9	0.6	3.89	1.15	29.563	2.51	64.5244	2.18261	0.23	1.515	78.76	1.52	12.63	4.13
777	1	38	2	29.44	4.54	2.17	4.95	0.88	17.7778	3.28	66.2626	3.72727	0.79	2.653	90.52	1.82	12.83	3.96
778	1	44	2	25.33	4.39	1.75	4.83	1.29	26.7081	2.47	51.1387	1.91473	1.07	2.679	101.35	1.72	14.2	4.75
779	1	61	3	20.94	5.01	1.12	4.99	1.21	24.2485	3.01	60.3206	2.4876	0.77	1.391	81.32	1.58	12.89	3.98
780	1	46	2	26.38	4.77	1.4	3.29	0.99	30.0912	1.67	50.7599	1.68687	0.63	1.521	70.65	1.56	12.43	4.1
781	1	30	1	17.67	4.75	1.42	4.71	1.14	24.2038	2.72	57.7495	2.38596	0.85	3.293	110.84	1.51	15.84	4.69
782	1	59	3	23.87	5.14	3.09	4.66	0.99	21.2446	2.2	47.2103	2.22222	1.47	1.812	115.29	1.84	14.72	4.96
783	1	51	2	23.77	5.1	0.89	3.92	1.12	28.5714	2.4	61.2245	2.14286	0.4	1.197	90.49	1.61	11.84	4.91
784	1	49	2	29.64	4.06	0.93	4.47	0.95	21.2528	3.07	68.6801	3.23158	0.45	2.309	96.48	1.52	12.89	4.94
785	1	28	1	25.83	4.21	0.6	4.59	1.77	38.5621	2.34	50.9804	1.32203	0.48	8.948	92.98	1.29	13.53	4.17
786	1	30	1	22.25	5.29	0.55	6.73	2.67	39.6731	3.59	53.3432	1.34457	0.47	1.692	83.12	1.83	12.06	5.4
787	1	34	1	21.56	4.93	1.01	4.51	1.49	33.0377	2.51	55.6541	1.68456	0.51	2.325	115.43	1.85	14.75	5.63
788	1	34	1	27.3	5.16	1.04	2.88	0.82	28.4722	1.51	52.4306	1.84146	0.55	2.774	99.02	1.77	12.69	4.7
789	1	32	1	24.01	4.47	3.36	3.77	0.79	20.9549	1.01	26.7905	1.27848	1.97	1.679	81.5	1.41	14.95	4.33
790	1	34	1	19.13	4.37	0.66	3.6	1.79	49.7222	1.47	40.8333	0.821229	0.34	1.076	100.13	1.88	15.8	5.27
791	1	29	1	23.97	4.62	0.65	5.03	1.05	20.8748	3.56	70.7753	3.39048	0.42	1.29	97.76	1.51	14.96	4.83
792	1	28	1	18.01	5.2	0.86	4.87	2.28	46.8172	2.11	43.3265	0.925439	0.48	1.587	111.94	1.72	15.3	5.16
793	1	30	1	22.41	4.8	0.62	4.73	1.32	27.907	2.93	61.945	2.2197	0.48	0.573	74.11	1.47	12.89	5.11
794	1	32	1	23.14	4.37	1.38	4.9	1.37	27.9592	2.82	57.551	2.05839	0.71	1.814	131.76	1.8	14.61	4.46
795	1	33	1	21.12	4.46	1.88	5.17	1.41	27.2727	2.77	53.5783	1.96454	0.99	1.43	127.55	1.53	14.82	4.67
796	1	36	2	22.01	4.13	0.71	4.83	1.52	31.47	2.74	56.7288	1.80263	0.57	2.199	83.86	1.17	14.29	4.94
797	1	28	1	18.03	4.61	1.06	4.89	1.53	31.2883	2.95	60.3272	1.9281	0.41	1.275	107.15	1.43	14.67	4.94
798	1	47	2	25.39	3.96	2.52	4.58	1.08	23.5808	2.44	53.2751	2.25926	1.06	1.181	76.42	1.81	11.56	4.94
799	1	30	1	23.67	3.73	1.57	4.06	1.01	24.8768	2.38	58.6207	2.35644	0.67	1.647	68.17	1.51	10.98	4.96
800	1	28	1	23.74	4.61	1.56	3.8	0.95	25	2.12	55.7895	2.23158	0.73	1.897	83.55	1.48	13.97	5.03
801	1	42	2	28.05	4.33	1.29	4	0.82	20.5	2.47	61.75	3.0122	0.71	1.208	103.84	1.57	13.33	4.32
802	1	37	2	20.41	4.87	2.57	6.24	1.08	17.3077	4.2	67.3077	3.88889	0.96	2.007	113.32	2.03	13.02	4.71
803	1	33	1	22.96	4.8	1.41	4.36	1.05	24.0826	2.65	60.7798	2.52381	0.66	1.29	82.63	1.79	11.64	4.95
804	1	32	1	27.92	4.64	1.1	4.11	1.41	34.3066	2.2	53.528	1.56028	0.5	2.181	100.3	1.48	14.75	5.13
805	1	31	1	25.18	4.65	1.28	3.55	1.33	37.4648	1.54	43.3803	1.15789	0.68	1.013	89.51	1.71	12.45	4.6
806	1	37	2	30.48	4.73	2.4	5.37	1.17	21.7877	3.08	57.3557	2.63248	1.12	0.844	52.84	1.1	11.75	4.26
807	1	56	3	25.32	5.31	0.59	4.77	1.46	30.608	2.72	57.0231	1.86301	0.59	1.718	80.69	1.58	10.89	4.34
808	1	41	2	20.9	5.38	3.17	6.53	0.99	15.1608	3.95	60.49	3.9899	1.59	3.322	89.69	1.7	12.31	4.9
809	1	46	2	24.04	4.17	0.72	4.7	1.8	38.2979	2.42	51.4894	1.34444	0.48	0.954	95.74	1.41	12.11	3.89
810	1	53	2	22.53	5.14	1.32	6.19	1.56	25.2019	3.72	60.0969	2.38462	0.91	1.606	100.76	1.44	12.55	4.02
811	2	34	1	23	4.66	0.68	4.85	2.15	44.3299	2.37	48.866	1.10233	0.33	1.835	96.75	1.5	12.37	4.69
812	1	56	3	17.02	4.87	0.7	3.4	1.44	42.3529	1.47	43.2353	1.02083	0.49	3.621	99.43	1.58	12.85	4.41
813	2	52	2	25.58	4.05	0.93	4.34	1.68	38.7097	1.99	45.8525	1.18452	0.67	1.461	89.42	1.34	11.98	4.1
814	1	48	2	27.19	4.56	0.79	4.06	1.34	33.0049	2.14	52.7094	1.59701	0.58	1.639	70.28	1.17	11.34	3.66
815	1	62	3	24.63	4.85	1.42	4.92	0.88	17.8862	3.14	63.8211	3.56818	0.9	2.061	102.08	1.83	11.55	4.45
816	1	54	2	20.35	5.45	0.99	5.04	1.26	25	3.03	60.119	2.40476	0.75	3.185	105.24	2.04	12.18	5.39
817	1	38	2	26.21	4.74	0.7	3.66	1.24	33.8798	1.89	51.6393	1.52419	0.53	1.488	89.45	1.41	12.67	4.83
818	2	48	2	22.6	5.3	1.06	3.39	0.94	27.7286	2.03	59.882	2.15957	0.42	0.837	79.49	1.21	11.54	3.71
819	1	36	2	25.57	5.84	1.45	3.38	1.16	34.3195	1.54	45.5621	1.32759	0.68	0.97	82.93	1.59	12.86	4.57
820	1	43	2	25.07	5.02	1.24	3.12	0.98	31.4103	1.58	50.641	1.61224	0.56	2.777	79.49	1.55	11.09	4.81
821	1	51	2	26.29	3.06	0.72	4.98	1.44	28.9157	2.91	58.4337	2.02083	0.63	2.612	94.27	1.8	11.38	4.72
822	2	72	3	24.15	5.16	1.34	6.47	1.01	15.6105	4.36	67.3879	4.31683	1.1	1.978	81.84	1.36	11.86	3.92
823	1	33	1	26.66	5.02	0.66	4.45	1.21	27.191	2.56	57.5281	2.1157	0.68	2.301	90.09	1.72	12.45	5.38
824	1	70	3	21.05	4.54	0.93	3.99	1.03	25.8145	2.35	58.8972	2.28155	0.61	1.336	78.36	1.91	10.26	3.91
825	1	41	2	23.28	5.29	0.75	6.17	2.11	34.1977	3.44	55.7536	1.63033	0.62	2.364	85.08	1.97	10.94	4.91
826	1	40	2	24.67	4.29	0.51	3.21	1.61	50.1558	1.31	40.81	0.813665	0.29	1.211	88.21	1.83	11.88	4.8
827	1	31	1	26.73	5.02	0.56	4.6	1.62	35.2174	2.56	55.6522	1.58025	0.42	0.955	93.79	1.67	12.87	4.08
828	2	48	2	20.23	4.02	1.71	5.75	2.38	41.3913	2.61	45.3913	1.09664	0.76	1.574	94.48	1.38	13	3.81
829	1	50	2	24.18	4.65	0.63	4.7	1.99	42.3404	2.38	50.6383	1.19598	0.33	1.17	79.4	1.44	12.24	4.45
830	1	29	1	22.77	4.55	1.02	2.89	1.17	40.4844	1.31	45.3287	1.11966	0.41	1.409	111.06	1.57	14.08	4.51
831	1	62	3	22.14	4.73	1.4	4.81	1.2	24.948	2.68	55.7173	2.23333	0.93	1.792	92.34	1.57	13.18	4.74
832	2	57	3	33.91	4.13	0.44	3.8	1.86	48.9474	1.62	42.6316	0.870968	0.32	2.678	72.4	1.59	11.65	4.75
833	2	62	3	19.61	4.44	1.26	5.48	1.37	25	3.48	63.5036	2.54015	0.63	0.628	118.99	1.56	13.02	4.19
834	1	58	3	25.62	5.16	1.14	3.71	0.97	26.1456	1.95	52.5606	2.01031	0.79	1.84	94.7	2.01	10.77	4.69
835	1	34	1	27.45	4.6	1.26	4.55	1.31	28.7912	2.44	53.6264	1.8626	0.8	2.188	100.39	1.65	12.03	4.62
836	1	41	2	21.45	4.53	0.53	4.41	1.35	30.6122	2.43	55.102	1.8	0.63	1.874	88.64	1.63	12.27	4.51
837	1	39	2	17.2	4.78	0.62	4.43	1.31	29.5711	2.47	55.7562	1.8855	0.65	1.819	113.01	1.59	13.85	4.45
838	1	32	1	24.55	4.66	0.89	3.79	1.02	26.9129	2.25	59.3668	2.20588	0.52	1.335	85.16	1.81	11.64	4.82
839	1	52	2	23.24	4.47	2.66	4.37	0.79	18.0778	2.48	56.7506	3.13924	1.1	1.682	109.21	1.81	12.88	5.13
840	1	28	1	21.86	3.89	0.86	5.37	1.16	21.6015	3.42	63.6872	2.94828	0.79	1.255	99.26	1.58	12.74	4.64
841	1	55	2	26.36	5.56	1.39	3.95	0.98	24.8101	2.25	56.962	2.29592	0.72	1.539	88.77	1.32	12.93	4.62
842	1	49	2	18.52	5.03	0.45	3.85	2.17	56.3636	1.41	36.6234	0.64977	0.27	2.165	81.77	1.43	10.61	4.22
843	1	56	3	24.55	4.53	0.98	5.76	1.37	23.7847	3.49	60.5903	2.54745	0.9	5.167	85.02	1.24	12.25	4.43
844	1	48	2	28.82	4.85	1.94	5.89	0.91	15.4499	3.79	64.3463	4.16484	1.19	1.241	86.87	1.64	11.14	4.84
845	1	42	2	23.49	5.23	4.26	5.01	0.89	17.7645	2.35	46.9062	2.64045	1.77	1.023	93.22	1.46	12.26	4.73
846	1	52	2	30.48	5.26	2.64	3.97	0.91	22.9219	1.74	43.8287	1.91209	1.32	79.986	46.13	1.31	6.03	3.62
847	1	34	1	23.87	5.24	0.78	4.73	1.71	36.1522	2.46	52.0085	1.4386	0.56	1.319	97.99	1.84	12.13	4.92
848	1	38	2	24.88	5.22	0.78	5.43	1.39	25.5985	3.32	61.1418	2.38849	0.72	1.27	73.94	1.4	10.96	3.86
849	1	51	2	24.45	5.09	1.27	5.5	1.27	23.0909	3.33	60.5455	2.62205	0.9	1.806	117.25	1.65	13.94	5
850	1	54	2	22.17	4.38	2.68	5.83	1.18	20.2401	3.58	61.4065	3.0339	1.07	1.278	73.88	1.47	10.62	4.47
851	1	53	2	21.6	4.51	1.04	5.99	1.16	19.3656	3.8	63.4391	3.27586	1.03	1.219	97.48	1.63	13.24	4.59
852	1	38	2	24.53	4.42	0.58	3.32	1.02	30.7229	1.96	59.0361	1.92157	0.34	2.282	79.03	1.56	11.26	4.81
853	1	41	2	23.96	4.36	2	5.93	1.53	25.801	3.21	54.1315	2.09804	1.19	1.313	99.52	1.64	12.25	5.03
854	1	58	3	22.05	4.99	2.02	4.86	1.21	24.8971	2.27	46.7078	1.87603	1.38	1.034	103.6	1.46	12.67	4.47
855	1	60	3	29.76	4.18	1.89	4.49	1.03	22.9399	2.48	55.2339	2.40777	0.98	2.626	100.66	1.95	11.3	5.03
856	1	45	2	26.95	4.57	1.99	3.79	0.94	24.8021	1.81	47.7573	1.92553	1.04	1.689	104.01	1.61	12.99	4.71
857	1	59	3	18.17	4.34	0.99	5.19	1.51	29.0944	2.93	56.4547	1.9404	0.75	1.384	74.13	1.23	10.66	4.03
858	1	40	2	24.74	4.57	1.5	4.3	0.88	20.4651	2.4	55.814	2.72727	1.02	2.997	83.93	1.46	11.3	3.39
859	1	39	2	24.89	5.64	1.77	4.81	1.13	23.4927	2.7	56.1331	2.38938	0.98	0.597	89.03	1.47	12.72	4.85
860	1	52	2	25.48	5.29	1.07	5.63	1.2	21.3144	3.47	61.6341	2.89167	0.96	1.581	94.24	1.54	12.24	4.86
861	1	39	2	23.44	3.61	1.78	5.28	1.22	23.1061	2.74	51.8939	2.2459	1.32	1.123	112.47	1.94	13.26	4.88
862	1	60	3	20.41	4.56	0.63	5.77	2.22	38.4749	2.88	49.9133	1.2973	0.67	0.62	72.33	1.26	12.54	4.47
863	1	39	2	19.56	4.71	0.92	3.98	0.9	22.6131	2.3	57.7889	2.55556	0.78	1.017	115.59	1.63	12.98	3.92
864	1	46	2	24.69	4.49	1.94	5.76	1.03	17.8819	3.38	58.6806	3.28155	1.35	1.517	122.19	1.76	13.84	5.1
865	1	50	2	19.72	4.7	1.27	5.35	1.59	29.7196	2.76	51.5888	1.73585	1	2.547	89.3	1.61	12.03	4.69
866	1	40	2	22.75	4.33	3.72	5.04	0.74	14.6825	2.62	51.9841	3.54054	1.68	0.662	78.94	1.3	13.49	4.48
867	1	57	3	24.13	4.37	1.03	5.37	1.22	22.7188	3.09	57.5419	2.53279	1.06	0.891	79.99	1.53	11.28	4.28
868	1	58	3	25.94	4.22	1.2	3.52	1.2	34.0909	1.63	46.3068	1.35833	0.69	2.439	69.17	1.51	10.39	4.34
869	1	51	2	23.8	4.75	1.6	4.87	1.3	26.694	2.48	50.924	1.90769	1.09	1.175	98.16	1.46	14.3	4.87
870	1	45	2	26.07	4.36	1.84	5.09	1	19.6464	2.97	58.3497	2.97	1.12	2.42	105.91	1.71	12.63	4.75
871	1	43	2	25.6	4.64	1.11	4.51	0.92	20.3991	2.61	57.8714	2.83696	0.98	1.14	128.5	2.24	13.88	5.74
872	1	49	2	24.43	4.4	0.87	5.17	1.27	24.5648	3.03	58.6074	2.38583	0.87	1.136	117.17	1.57	13.61	4.83
873	1	49	2	22.13	4.39	1.22	3.93	1.23	31.2977	1.97	50.1272	1.60163	0.73	0.837	89.64	1.61	12.31	4.82
874	1	41	2	25.79	5.44	2.04	4.91	1.18	24.0326	2.67	54.3788	2.26271	1.06	1.404	80.3	1.47	13.49	4.8
875	1	50	2	22.48	4.38	1.9	5.14	0.86	16.7315	3.23	62.8405	3.75581	1.05	2.677	104.32	1.67	12.52	4.38
876	1	51	2	28.36	4.97	4.22	3.49	0.86	24.6418	1.34	38.3954	1.55814	1.29	2.424	88.4	1.69	10.59	5.11
877	1	54	2	28.74	4.85	1.46	3.89	0.85	21.8509	2.18	56.0411	2.56471	0.86	2.65	55.21	1.24	9.25	4.26
878	1	48	2	24.54	4.72	0.63	4.28	1.9	44.3925	2	46.729	1.05263	0.38	1.778	61.24	1.27	9.94	4.44
879	1	29	1	20.31	4.68	0.79	3.14	0.91	28.9809	1.63	51.9108	1.79121	0.6	4.516	130.51	1.89	16.64	5.3
880	1	30	1	24.55	4.46	1.7	4.26	1.01	23.7089	2.21	51.8779	2.18812	1.04	1.751	97.81	1.44	13.58	4.71
881	1	29	1	23.14	4.52	1.95	6.05	0.9	14.876	3.69	60.9917	4.1	1.46	1.68	104.64	1.75	12.75	5.58
882	1	31	1	22.57	4.64	0.86	4.17	1.11	26.6187	2.33	55.8753	2.0991	0.73	2.122	107.58	1.59	12.4	4.51
